# Supplementary material
Source: publisher figshare collection journal article supplement (https://acs.figshare.com/ndownloader/files/3856123)
Supplement: Supplementary file 1 [file 3856123]

## Sheet: Peptide List n=2868
Supplementary Table 2A: List of 2868 peptides identified using iTRAQ
Distinct Peptide Index	Protein N	Representative Accession	Sequence	Modifications	Cleavages	Theoretical MW	# Features	Max Conf	Score at Max Conf	Log Precursor Signal (z w max sig)	Fraction of Total Signal for Sequence	Redundant Acquisitions	Acquisition Time (Min) Max Conf	Apex Retention Time (Min)
1	1	sp|P21333|FLNA_HUMAN	AEAGVPAEFSIWTR	iTRAQ8plex@N-term		1836.97	1	99	17	5.44998	1	16	67.9567	68.0067
2	1	sp|P21333|FLNA_HUMAN	AEFTVETR	iTRAQ8plex@N-term		1255.67	1	99	14	4.13004	1	34	49.1577	49.2085
3	1	sp|P21333|FLNA_HUMAN	AEISFEDR	iTRAQ8plex@N-term		1269.65	1	99	10	3.65225	1	19	51.5086	51.5438
4	1	sp|P21333|FLNA_HUMAN	AEISCTDNQDGTCSVSYLPVLPGDYSILVK	iTRAQ8plex@N-term; Methylthio(C)@5; Methylthio(C)@13; iTRAQ8plex(K)@30		3886.9	4	99	10	4.0035	1	1	83.2623	83.2237
5	1	sp|P21333|FLNA_HUMAN	AFGPGLQGGSAGSPAR	iTRAQ8plex@N-term		1732.92	1	99	20	3.97607	1	4	50.9625	50.9677
6	1	sp|P21333|FLNA_HUMAN	AGNNMLLVGVHGPR	iTRAQ8plex@N-term		1737.96	1	99	13	4.40849	1	6	54.7444	54.6316
7	1	sp|P21333|FLNA_HUMAN	AGVAPLQVK	iTRAQ8plex@N-term; iTRAQ8plex(K)@9		1489.94	2	99	12	3.80611	1	2	51.9307	51.9543
8	1	sp|P21333|FLNA_HUMAN	AHEPTYFTVDCAEAGQGDVSIGIK	iTRAQ8plex@N-term; Methylthio(C)@11; iTRAQ8plex(K)@24		3161.56	3	99	15	4.69905	0.647659	2	67.5816	67.5935
9	1	sp|P21333|FLNA_HUMAN	AHEPTYFTVDCAEAGQGDVSIGIK	iTRAQ8plex@N-term; Methylthio(C)@11; Deamidated(Q)@16; iTRAQ8plex(K)@24		3162.55	4	99	13	4.43466	0.352341	1	66.6454	66.6084
10	1	sp|P21333|FLNA_HUMAN	AHVVPCFDASK	iTRAQ8plex@N-term; Methylthio(C)@6; iTRAQ8plex(K)@11		1826.96	3	99	9	4.37096	1	5	56.393	56.3158
11	1	sp|P21333|FLNA_HUMAN	ANLPQSFQVDTSK	iTRAQ8plex@N-term; iTRAQ8plex(K)@13		2042.13	2	99	10	4.3616	1	3	57.376	57.2479
12	1	sp|P21333|FLNA_HUMAN	ASGPGLNTTGVPASLPVEFTIDAK	iTRAQ8plex@N-term; iTRAQ8plex(K)@24		2949.63	2	99	16	5.25303	0.859109	10	71.5284	71.6236
13	1	sp|P21333|FLNA_HUMAN	ASGPGLNTTGVPASLPVEFTIDAK	iTRAQ8plex@N-term; Deamidated(N)@7; iTRAQ8plex(K)@24		2950.61	3	99	18	4.46786	0.140891	9	72.514	72.4314
14	1	sp|P21333|FLNA_HUMAN	AWGPGLEGGVVGK	iTRAQ8plex@N-term; iTRAQ8plex(K)@13		1834.06	2	99	16	4.8805	1	7	59.5426	59.5578
15	1	sp|P21333|FLNA_HUMAN	AYGPGIEPTGNMVK	iTRAQ8plex@N-term; iTRAQ8plex(K)@14		2041.11	2	99	17	4.30554	1	9	55.4876	55.4503
16	1	sp|P21333|FLNA_HUMAN	CAPGVVGPAEADIDFDIIR	iTRAQ8plex@N-term; Methylthio(C)@1		2307.15	2	99	17	5.61438	1	18	75.7886	75.978
17	1	sp|P21333|FLNA_HUMAN	CSYQPTMEGVHTVHVTFAGVPIPR	iTRAQ8plex@N-term; Methylthio(C)@1		2975.48	2	99	14	4.37891	1	3	66.1888	66.1114
18	1	sp|P21333|FLNA_HUMAN	DAGEGGLSLAIEGPSK	iTRAQ8plex@N-term; iTRAQ8plex(K)@16		2108.16	2	99	16	5.00668	1	16	59.3207	59.4208
19	1	sp|P21333|FLNA_HUMAN	DAGEGLLAVQITDPEGKPK	iTRAQ8plex@N-term; iTRAQ8plex(K)@17; iTRAQ8plex(K)@19		2849.63	3	98.54	12	4.82973	1	7	59.742	59.7954
20	1	sp|P21333|FLNA_HUMAN	DAPQDFHPDR	iTRAQ8plex@N-term		1500.73	1	99	14	3.51772	1	3	41.8494	41.8546
21	1	sp|P21333|FLNA_HUMAN	DGSCGVAYVVQEPGDYEVSVK	iTRAQ8plex@N-term; Methylthio(C)@4; iTRAQ8plex(K)@21		2854.4	3	99	17	4.85092	1	10	66.151	66.1562
22	1	sp|P21333|FLNA_HUMAN	EAGAGGLAIAVEGPSK	iTRAQ8plex@N-term; iTRAQ8plex(K)@16		2034.16	2	99	17	4.69012	1	14	57.5761	57.5617
23	1	sp|P21333|FLNA_HUMAN	EATTEFSVDAR	iTRAQ8plex@N-term		1528.77	1	99	15	5.0971	1	20	51.2773	51.3805
24	1	sp|P21333|FLNA_HUMAN	EEGPYEVEVTYDGVPVPGSPFPLEAVAPTKPSK	iTRAQ8plex@N-term; iTRAQ8plex(K)@30; iTRAQ8plex(K)@33		4397.35	3	99	16	5.05961	1	7	72.2907	72.2959
25	1	sp|P21333|FLNA_HUMAN	EGPYSISVLYGDEEVPR	iTRAQ8plex@N-term		2213.12	1	99	16	5.2542	1	8	66.3644	66.4667
26	1	sp|P21333|FLNA_HUMAN	ENGVYLIDVK	iTRAQ8plex@N-term; Deamidated(N)@2; iTRAQ8plex(K)@10		1758	3	99	12	4.6196	1	4	61.3441	61.4083
27	1	sp|P21333|FLNA_HUMAN	ETGEHLVHVK	iTRAQ8plex@N-term; iTRAQ8plex(K)@10		1756.01	2	99	13	3.51148	1	6	43.2781	43.2833
28	1	sp|P21333|FLNA_HUMAN	FGGEHVPNSPFQVTALAGDQPSVQPPLR	iTRAQ8plex@N-term		3248.69	1	99	16	5.38827	1	8	67.8013	67.9103
29	1	sp|P21333|FLNA_HUMAN	FNEEHIPDSPFVVPVASPSGDAR	iTRAQ8plex@N-term		2770.39	1	99	17	5.14323	0.827955	11	66.0122	66.1562
30	1	sp|P21333|FLNA_HUMAN	FNEEHIPDSPFVVPVASPSGDAR	iTRAQ8plex@N-term; Deamidated(N)@2		2771.37	2	99	11	4.46087	0.172045	3	68.0307	68.091
31	1	sp|P21333|FLNA_HUMAN	GAGTGGLGLAVEGPSEAK	iTRAQ8plex@N-term; iTRAQ8plex(K)@18		2178.21	2	99	16	4.57875	1	13	56.2017	56.2658
32	1	sp|P21333|FLNA_HUMAN	GAGSYTIMVLFADQATPTSPIR	iTRAQ8plex@N-term		2599.36	1	99	21	5.04573	0.427503	6	78.9515	79.0085
33	1	sp|P21333|FLNA_HUMAN	GAGSYTIMVLFADQATPTSPIR	iTRAQ8plex@N-term; Deamidated(Q)@14		2600.35	2	99	16	5.17257	0.572497	1	77.2009	77.3018
34	1	sp|P21333|FLNA_HUMAN	GLVEPVDVVDNADGTQTVNYVPSR	iTRAQ8plex@N-term		2847.46	1	99	25	5.2358	1	9	64.538	64.5886
35	1	sp|P21333|FLNA_HUMAN	GTVEPQLEAR	iTRAQ8plex@N-term		1402.77	1	99	13	3.60487	1	4	46.6345	46.6173
36	1	sp|P21333|FLNA_HUMAN	HTAMVSWGGVSIPNSPFR	iTRAQ8plex@N-term		2246.16	1	99	17	5.1302	1	6	65.6893	65.8386
37	1	sp|P21333|FLNA_HUMAN	IANLQTDLSDGLR	iTRAQ8plex@N-term		1718.95	1	99	18	5.34678	1	13	67.8096	67.8648
38	1	sp|P21333|FLNA_HUMAN	IECDDKGDGSCDVR	iTRAQ8plex@N-term; Methylthio(C)@3; iTRAQ8plex(K)@6; Methylthio(C)@11	missed K-G@6	2210.99	5	99	15	4.91601	1	17	54.3406	54.3133
39	1	sp|P21333|FLNA_HUMAN	IPEISIQDMTAQVTSPSGK	iTRAQ8plex@N-term; iTRAQ8plex(K)@19		2609.42	2	99	12	4.93612	1	5	70.8844	70.993
40	1	sp|P21333|FLNA_HUMAN	IVGPSGAAVPCK	iTRAQ8plex@N-term; Methylthio(C)@11; iTRAQ8plex(K)@12		1751.99	3	99	11	4.64961	1	5	57.5711	57.6488
41	1	sp|P21333|FLNA_HUMAN	KGEITGEVR	iTRAQ8plex@N-term; iTRAQ8plex(K)@1	missed K-G@1	1595.95	3	99	13	3.5783	1	4	45.1509	45.1111
42	1	sp|P21333|FLNA_HUMAN	LDVQFSGLTK	iTRAQ8plex@N-term; iTRAQ8plex(K)@10		1715.01	2	99	12	4.4413	1	6	62.3979	62.3575
43	1	sp|P21333|FLNA_HUMAN	LIALLEVLSQK	iTRAQ8plex@N-term; iTRAQ8plex(K)@11		1834.18	2	99	16	4.84081	1	20	92.255	92.2261
44	1	sp|P21333|FLNA_HUMAN	LIALLEVLSQKK	iTRAQ8plex@N-term; iTRAQ8plex(K)@11; iTRAQ8plex(K)@12	missed K-K@11	2266.48	4	98.47	10	4.58083	1	1	84.7554	84.7019
45	1	sp|P21333|FLNA_HUMAN	LLGWIQNK	iTRAQ8plex@N-term; iTRAQ8plex(K)@8		1578.97	2	99	12	5.05327	1	13	69.9448	70.0494
46	1	sp|P21333|FLNA_HUMAN	LQVEPAVDTSGVQCYGPGIEGQGVFR	iTRAQ8plex@N-term; Methylthio(C)@14		3055.5	2	99	23	5.75536	1	13	71.7994	71.8948
47	1	sp|P21333|FLNA_HUMAN	LSPFMADIR	iTRAQ8plex@N-term		1352.74	1	99	8	4.84968	1	5	65.2598	65.1608
48	1	sp|P21333|FLNA_HUMAN	LYSVSYLLK	iTRAQ8plex@N-term; iTRAQ8plex(K)@9		1693.03	2	99	11	5.02434	1	12	71.0064	71.0432
49	1	sp|P21333|FLNA_HUMAN	MDCQECPEGYR	iTRAQ8plex@N-term; Methylthio(C)@3; Methylthio(C)@6		1725.66	3	99	12	4.31203	1	7	58.2031	58.2217
50	1	sp|P21333|FLNA_HUMAN	RAEFTVETR	iTRAQ8plex@N-term	missed R-A@1	1411.77	2	99	14	4.13242	1	6	43.9593	44.0096
51	1	sp|P21333|FLNA_HUMAN	SADFVVEAIGDDVGTLGFSVEGPSQAK	iTRAQ8plex@N-term; iTRAQ8plex(K)@27		3302.71	2	99	18	4.90678	1	24	82.645	82.6519
52	1	sp|P21333|FLNA_HUMAN	SAGQGEVLVYVEDPAGHQEEAK	iTRAQ8plex@N-term; iTRAQ8plex(K)@22		2920.5	2	99	18	5.05781	1	9	57.8243	57.9238
53	1	sp|P21333|FLNA_HUMAN	SPFEVYVDK	iTRAQ8plex@N-term; iTRAQ8plex(K)@9		1690.94	2	98.99	10	4.81657	1	5	60.3432	60.3719
54	1	sp|P21333|FLNA_HUMAN	SPFSVAVSPSLDLSK	iTRAQ8plex@N-term; iTRAQ8plex(K)@15		2141.22	2	99	16	5.58144	1	9	67.0382	67.0534
55	1	sp|P21333|FLNA_HUMAN	SPYTVTVGQACNPSACR	iTRAQ8plex@N-term; Methylthio(C)@11; Methylthio(C)@16		2148.97	3	99	15	5.07791	1	6	63.5864	63.6438
56	1	sp|P21333|FLNA_HUMAN	SSFTVDCSK	iTRAQ8plex@N-term; Methylthio(C)@7; iTRAQ8plex(K)@9		1626.82	3	99	10	4.53721	1	8	56.3853	56.2318
57	1	sp|P21333|FLNA_HUMAN	TFSVWYVPEVTGTHK	iTRAQ8plex@N-term; iTRAQ8plex(K)@15		2358.28	2	99	15	5.00379	1	6	64.4059	64.3692
58	1	sp|P21333|FLNA_HUMAN	TGVAVNKPAEFTVDAK	iTRAQ8plex@N-term; iTRAQ8plex(K)@7; iTRAQ8plex(K)@16		2558.48	3	99	11	4.39032	1	4	54.5741	54.6788
59	1	sp|P21333|FLNA_HUMAN	VANPSGNLTETYVQDR	iTRAQ8plex@N-term		2067.05	1	99	17	4.70728	0.702069	3	55.1258	55.1769
60	1	sp|P21333|FLNA_HUMAN	VANPSGNLTETYVQDR	iTRAQ8plex@N-term; Deamidated(N)@7		2068.04	2	99	16	4.33502	0.297931	4	54.7033	54.7153
61	1	sp|P21333|FLNA_HUMAN	VAQPTITDNKDGTVTVR	iTRAQ8plex@N-term; iTRAQ8plex(K)@10	missed K-D@10	2422.36	3	99	12	4.26446	1	5	51.1405	51.1491
62	1	sp|P21333|FLNA_HUMAN	VDVGKDQEFTVK	iTRAQ8plex@N-term; iTRAQ8plex(K)@5; iTRAQ8plex(K)@12	missed K-D@5	2276.31	4	97.98	9	4.09548	1	3	53.3656	53.3926
63	1	sp|P21333|FLNA_HUMAN	VEYTPYEEGLHSVDVTYDGSPVPSSPFQVPVTEGCDPSR	iTRAQ8plex@N-term; Methylthio(C)@35		4589.12	2	99	17	5.0818	1	6	75.2698	75.3628
64	1	sp|P21333|FLNA_HUMAN	VGSAADIPINISETDLSLLTATVVPPSGR	iTRAQ8plex@N-term		3196.75	1	99	26	5.48902	1	23	86.3837	86.3479
65	1	sp|P21333|FLNA_HUMAN	VHSPSGALEECYVTEIDQDK	iTRAQ8plex@N-term; Methylthio(C)@11; iTRAQ8plex(K)@20		2873.4	3	99	14	4.77532	1	3	65.2733	65.2852
66	1	sp|P21333|FLNA_HUMAN	VQVQDNEGCPVEALVK	iTRAQ8plex@N-term; Methylthio(C)@9; iTRAQ8plex(K)@16		2381.25	3	99	15	5.00324	1	12	65.3977	65.3609
67	1	sp|P21333|FLNA_HUMAN	VSGLGEK	iTRAQ8plex@N-term; iTRAQ8plex(K)@7		1296.79	2	98.97	11	3.57054	1	2	47.4721	47.4773
68	1	sp|P21333|FLNA_HUMAN	VSGQGLHEGHTFEPAEFIIDTR	iTRAQ8plex@N-term		2743.39	1	99	16	4.5395	1	1	62.6689	62.6858
69	1	sp|P21333|FLNA_HUMAN	VTAQGPGLEPSGNIANK	iTRAQ8plex@N-term; iTRAQ8plex(K)@17		2260.26	2	99	16	4.20839	1	8	53.6742	53.6795
70	1	sp|P21333|FLNA_HUMAN	VTVLFAGQHIAK	iTRAQ8plex@N-term; iTRAQ8plex(K)@12		1891.15	2	99	10	4.86796	1	15	61.7589	61.6547
71	1	sp|P21333|FLNA_HUMAN	VTYTPMAPGSYLISIK	iTRAQ8plex@N-term; iTRAQ8plex(K)@16		2348.33	2	99	12	5.39548	1	9	69.3411	69.4162
72	1	sp|P21333|FLNA_HUMAN	YAPSEAGLHEMDIR	iTRAQ8plex@N-term		1891.94	1	99	13	4.32282	1	3	55.4809	55.4503
73	1	sp|P21333|FLNA_HUMAN	YGGDEIPFSPYR	iTRAQ8plex@N-term		1703.85	1	99	12	4.78492	1	6	60.9976	61.0663
74	1	sp|P21333|FLNA_HUMAN	YGGQPVPNFPSK	iTRAQ8plex@N-term; iTRAQ8plex(K)@12		1898.05	2	99	11	4.15616	1	3	55.6122	55.5987
75	1	sp|P21333|FLNA_HUMAN	YNEQHVPGSPFTAR	iTRAQ8plex@N-term		1905.96	1	99	13	3.99987	1	3	50.3115	50.3168
76	1	sp|P21333|FLNA_HUMAN	YTILIK	iTRAQ8plex@N-term; iTRAQ8plex(K)@6		1357.88	2	98.82	7	4.37256	1	3	59.4037	59.3949
77	1	sp|P21333|FLNA_HUMAN	YTPVQQGPVGVNVTYGGDPIPK	iTRAQ8plex@N-term; iTRAQ8plex(K)@22		2893.58	2	99	14	5.30362	1	8	62.125	62.1759
78	1	sp|P21333|FLNA_HUMAN	YWPQEAGEYAVHVLCNSEDIR	iTRAQ8plex@N-term; Methylthio(C)@15		2828.32	2	99	14	5.32421	0.725661	25	80.4012	80.5439
79	1	sp|P21333|FLNA_HUMAN	YWPQEAGEYAVHVLCNSEDIR	iTRAQ8plex@N-term; Methylthio(C)@15; Deamidated(N)@16		2829.3	3	99	16	4.90176	0.274339	5	79.9776	79.8041
80	2	sp|P35579|MYH9_HUMAN	ALEEAMEQK	iTRAQ8plex@N-term; iTRAQ8plex(K)@9		1655.9	2	98.49	11	4.59912	1	9	57.1243	57.0135
81	2	sp|P35579|MYH9_HUMAN	ALEQQVEEMK	iTRAQ8plex@N-term; iTRAQ8plex(K)@10		1811.99	2	99	12	4.58994	1	15	59.0137	59.0323
82	2	sp|P35579|MYH9_HUMAN	ALELDSNLYR	iTRAQ8plex@N-term		1496.81	1	99	14	4.69814	1	26	60.5512	60.4951
83	2	sp|P35579|MYH9_HUMAN	ANLQIDQINTDLNLER	iTRAQ8plex@N-term		2173.16	1	99	17	4.79152	1	9	66.1062	66.1562
84	2	sp|P35579|MYH9_HUMAN	ASITALEAK	iTRAQ8plex@N-term; iTRAQ8plex(K)@9		1510.92	2	99	13	4.47756	1	7	54.3065	54.2404
85	2	sp|P35579|MYH9_HUMAN	ASREEILAQAK	iTRAQ8plex@N-term; iTRAQ8plex(K)@11	missed R-E@3	1823.07	3	97.5	11	3.92583	1	2	47.3182	47.3402
86	2	sp|P35579|MYH9_HUMAN	DFSALESQLQDTQELLQEENR	iTRAQ8plex@N-term		2796.37	1	99	26	5.78656	0.966383	24	79.7012	79.6238
87	2	sp|P35579|MYH9_HUMAN	DFSALESQLQDTQELLQEENR	iTRAQ8plex@N-term; Deamidated(N)@20		2797.36	2	99	13	4.32797	0.0336173	2	79.0038	79.0157
88	2	sp|P35579|MYH9_HUMAN	DLEGLSQR	iTRAQ8plex@N-term		1220.67	1	99	10	3.70492	1	6	49.0142	49.0261
89	2	sp|P35579|MYH9_HUMAN	DLGEELEALK	iTRAQ8plex@N-term; iTRAQ8plex(K)@10		1723.98	2	99	13	5.09212	1	8	66.1595	66.1411
90	2	sp|P35579|MYH9_HUMAN	DLGEELEALKTELEDTLDSTAAQQELR	iTRAQ8plex@N-term; iTRAQ8plex(K)@10	missed K-T@10	3624.88	3	99	23	5.30807	1	22	91.8664	91.6572
91	2	sp|P35579|MYH9_HUMAN	DVLLQVDDER	iTRAQ8plex@N-term		1504.8	1	99	10	4.1499	1	5	58.2116	58.1977
92	2	sp|P35579|MYH9_HUMAN	EDQSILCTGESGAGK	iTRAQ8plex@N-term; Methylthio(C)@7; iTRAQ8plex(K)@15		2148.07	3	99	14	3.8697	1	4	55.8911	55.898
93	2	sp|P35579|MYH9_HUMAN	EEILAQAK	iTRAQ8plex@N-term; iTRAQ8plex(K)@8		1508.9	2	99	10	4.10291	1	8	54.964	54.8564
94	2	sp|P35579|MYH9_HUMAN	ELESQISELQEDLESER	iTRAQ8plex@N-term		2337.15	1	99	20	5.42851	1	20	77.6524	77.5299
95	2	sp|P35579|MYH9_HUMAN	EMEAELEDER	iTRAQ8plex@N-term		1553.72	1	99	10	3.73272	1	7	53.1589	53.2276
96	2	sp|P35579|MYH9_HUMAN	EQADFAIEALAK	iTRAQ8plex@N-term; iTRAQ8plex(K)@12		1913.07	2	99	17	4.60406	1	9	63.9048	63.9551
97	2	sp|P35579|MYH9_HUMAN	EQEVNILK	iTRAQ8plex@N-term; iTRAQ8plex(K)@8		1579.94	2	99	10	4.15427	1	4	53.6487	53.7174
98	2	sp|P35579|MYH9_HUMAN	FVSELWK	iTRAQ8plex@N-term; iTRAQ8plex(K)@7		1515.89	2	98.44	8	5.01711	1	12	67.7377	67.9103
99	2	sp|P35579|MYH9_HUMAN	GALALEEK	iTRAQ8plex@N-term; iTRAQ8plex(K)@8		1437.87	2	99	10	4.30443	1	7	51.7495	51.7831
100	2	sp|P35579|MYH9_HUMAN	HSQAVEELAEQLEQTK	iTRAQ8plex@N-term; iTRAQ8plex(K)@16		2447.31	2	99	17	4.89989	1	8	63.8953	63.8597
101	2	sp|P35579|MYH9_HUMAN	IAEFTTNLTEEEEK	iTRAQ8plex@N-term; iTRAQ8plex(K)@14		2261.19	2	99	17	4.89348	1	14	67.0245	67.0298
102	2	sp|P35579|MYH9_HUMAN	IAQLEEQLDNETK	iTRAQ8plex@N-term; iTRAQ8plex(K)@13		2138.17	2	99	17	4.88998	0.771897	8	68.0407	68.046
103	2	sp|P35579|MYH9_HUMAN	IAQLEEQLDNETK	iTRAQ8plex@N-term; Deamidated(N)@10; iTRAQ8plex(K)@13		2139.15	3	99	10	4.36056	0.228103	1	67.6307	67.6011
104	2	sp|P35579|MYH9_HUMAN	IAQLEEELEEEQGNTELINDR	iTRAQ8plex@N-term		2775.37	1	99	25	5.62151	0.678568	26	77.2529	77.1731
105	2	sp|P35579|MYH9_HUMAN	IAQLEEELEEEQGNTELINDR	iTRAQ8plex@N-term; Deamidated(N)@19		2776.36	2	99	24	5.29701	0.321432	16	77.7465	77.8422
106	2	sp|P35579|MYH9_HUMAN	IAQLEEELEEEQGNTELINDRLK	iTRAQ8plex@N-term; Deamidated(N)@19; iTRAQ8plex(K)@23	missed R-L@21	3321.74	4	99	17	4.83103	1	4	74.6362	74.6464
107	2	sp|P35579|MYH9_HUMAN	IMGIPEEEQMGLLR	iTRAQ8plex@N-term		1919.02	1	99	14	4.97989	1	15	69.5913	69.6417
108	2	sp|P35579|MYH9_HUMAN	INFDVNGYIVGANIETYLLEK	iTRAQ8plex@N-term; Deamidated(N)@6; iTRAQ8plex(K)@21		2993.62	3	99	12	4.0984	1	6	86.0609	86.0363
109	2	sp|P35579|MYH9_HUMAN	IRELESQISELQEDLESER	iTRAQ8plex@N-term	missed R-E@2	2606.33	2	99	14	4.76827	1	7	81.308	81.371
110	2	sp|P35579|MYH9_HUMAN	KANLQIDQINTDLNLER	iTRAQ8plex@N-term; iTRAQ8plex(K)@1	missed K-A@1	2605.46	3	99	13	4.95624	0.639162	5	60.9098	60.9334
111	2	sp|P35579|MYH9_HUMAN	KANLQIDQINTDLNLER	iTRAQ8plex@N-term; iTRAQ8plex(K)@1; Deamidated(Q)@5	missed K-A@1	2606.45	4	98.39	13	4.70794	0.360838	2	61.8173	61.8359
112	2	sp|P35579|MYH9_HUMAN	KLEGDSTDLSDQIAELQAQIAELK	iTRAQ8plex@N-term; iTRAQ8plex(K)@1; iTRAQ8plex(K)@24	missed K-L@1	3526.95	4	99	11	5.71214	1	13	79.0492	79.0157
113	2	sp|P35579|MYH9_HUMAN	KMQQNIQELEEQLEEEESAR	iTRAQ8plex@N-term; iTRAQ8plex(K)@1	missed K-M@1	3068.55	3	99	14	4.94167	0.719934	10	68.7972	68.7672
114	2	sp|P35579|MYH9_HUMAN	KMQQNIQELEEQLEEEESAR	iTRAQ8plex@N-term; iTRAQ8plex(K)@1; Deamidated(Q)@12	missed K-M@1	3069.54	4	99	14	4.53163	0.280066	2	68.7168	68.6768
115	2	sp|P35579|MYH9_HUMAN	KQELEEICHDLEAR	iTRAQ8plex@N-term; iTRAQ8plex(K)@1; Methylthio(C)@8	missed K-Q@1	2366.22	4	99	13	5.32782	1	11	71.2253	71.2071
116	2	sp|P35579|MYH9_HUMAN	LDPHLVLDQLR	iTRAQ8plex@N-term		1621.95	1	99	14	5.37939	1	13	66.2147	66.2006
117	2	sp|P35579|MYH9_HUMAN	LEEEQIILEDQNCK	iTRAQ8plex@N-term; Methylthio(C)@13; iTRAQ8plex(K)@14		2357.21	3	99	13	4.54578	1	2	65.696	65.6578
118	2	sp|P35579|MYH9_HUMAN	LEGDSTDLSDQIAELQAQIAELK	iTRAQ8plex@N-term; iTRAQ8plex(K)@23		3094.65	2	99	20	5.15721	1	15	85.3102	85.3619
119	2	sp|P35579|MYH9_HUMAN	LEVNLQAMK	iTRAQ8plex@N-term; iTRAQ8plex(K)@9		1652.97	2	99	12	5.20267	0.916499	8	60.9304	61.0051
120	2	sp|P35579|MYH9_HUMAN	LEVNLQAMK	iTRAQ8plex@N-term; Oxidation(M)@8; iTRAQ8plex(K)@9		1668.97	3	99	8	4.16224	0.0835014	5	55.1056	55.2174
121	2	sp|P35579|MYH9_HUMAN	LKDVLLQVDDER	iTRAQ8plex@N-term; iTRAQ8plex(K)@2	missed K-D@2	2050.19	3	98.38	12	4.68858	1	9	66.0739	66.1411
122	2	sp|P35579|MYH9_HUMAN	LQEMEGTVK	iTRAQ8plex@N-term; iTRAQ8plex(K)@9		1641.92	2	98.26	7	3.96539	1	4	56.2635	56.225
123	2	sp|P35579|MYH9_HUMAN	LQLQEQLQAETELCAEAEELR	iTRAQ8plex@N-term; Methylthio(C)@14		2793.38	2	99	21	5.51403	1	36	82.3331	82.0324
124	2	sp|P35579|MYH9_HUMAN	LQQELDDLLVDLDHQR	iTRAQ8plex@N-term		2253.19	1	99	22	6.156	1	57	82.7725	82.8779
125	2	sp|P35579|MYH9_HUMAN	LQQLFNHTMFILEQEEYQR	iTRAQ8plex@N-term		2770.41	1	99	15	4.36592	1	2	84.0446	84.0598
126	2	sp|P35579|MYH9_HUMAN	LQVELDNVTGLLSQSDSK	iTRAQ8plex@N-term; iTRAQ8plex(K)@18		2553.41	2	99	12	5.70201	1	23	76.5864	76.4661
127	2	sp|P35579|MYH9_HUMAN	LTEMETLQSQLMAEK	iTRAQ8plex@N-term; iTRAQ8plex(K)@15		2359.26	2	99	15	5.19648	0.720118	39	75.5281	75.3189
128	2	sp|P35579|MYH9_HUMAN	LTEMETLQSQLMAEK	iTRAQ8plex@N-term; Deamidated(Q)@10; iTRAQ8plex(K)@15		2360.24	3	99	10	4.27291	0.0858687	3	73.0687	73.0578
129	2	sp|P35579|MYH9_HUMAN	LTEMETLQSQLMAEK	iTRAQ8plex@N-term; Oxidation(M)@12; iTRAQ8plex(K)@15		2375.25	3	99	11	4.6269	0.194013	4	69.0706	69.0842
130	2	sp|P35579|MYH9_HUMAN	MQQNIQELEEQLEEEESAR	iTRAQ8plex@N-term		2636.25	1	99	20	5.71585	0.798304	12	75.6584	75.7581
131	2	sp|P35579|MYH9_HUMAN	MQQNIQELEEQLEEEESAR	iTRAQ8plex@N-term; Deamidated(Q)@6		2637.24	2	99	17	4.90263	0.122728	1	74.0996	74.2438
132	2	sp|P35579|MYH9_HUMAN	MQQNIQELEEQLEEEESAR	iTRAQ8plex@N-term; Oxidation(M)@1		2652.25	2	99	14	4.71114	0.0789685	2	66.5562	66.5631
133	2	sp|P35579|MYH9_HUMAN	NKHEAMITDLEER	iTRAQ8plex@N-term; iTRAQ8plex(K)@2	missed K-H@2	2193.17	3	99	15	4.13644	1	5	49.6306	49.6475
134	2	sp|P35579|MYH9_HUMAN	NLPIYSEEIVEMYK	iTRAQ8plex@N-term; iTRAQ8plex(K)@14		2335.26	2	99	8	4.26816	1	2	71.8467	71.8786
135	2	sp|P35579|MYH9_HUMAN	NWQWWR	iTRAQ8plex@N-term		1278.66	1	98.88	9	4.98408	1	5	63.4695	63.5384
136	2	sp|P35579|MYH9_HUMAN	QAQQERDELADEIANSSGK	Gln->pyro-Glu@N-term; iTRAQ8plex(K)@19	missed R-D@6	2375.15	3	99	17	4.68786	0.540657	2	58.7662	58.7274
137	2	sp|P35579|MYH9_HUMAN	QAQQERDELADEIANSSGK	iTRAQ8plex@N-term; iTRAQ8plex(K)@19	missed R-D@6	2696.38	3	99	12	4.56422	0.406705	3	55.6673	55.6792
138	2	sp|P35579|MYH9_HUMAN	QAQQERDELADEIANSSGK	iTRAQ8plex@N-term; Deamidated(N)@15; iTRAQ8plex(K)@19	missed R-D@6	2697.37	4	99	12	3.67624	0.052638	4	53.2647	53.27
139	2	sp|P35579|MYH9_HUMAN	QELEEICHDLEAR	Gln->pyro-Glu@N-term; Methylthio(C)@7		1612.69	2	99	13	4.89544	0.601856	5	79.4937	79.4672
140	2	sp|P35579|MYH9_HUMAN	QELEEICHDLEAR	iTRAQ8plex@N-term; Methylthio(C)@7		1933.92	2	99	14	4.71599	0.398144	1	72.2542	72.2827
141	2	sp|P35579|MYH9_HUMAN	QIATLHAQVADMK	Gln->pyro-Glu@N-term; iTRAQ8plex(K)@13		1711.92	2	99	15	4.76603	0.519281	7	58.9605	58.9658
142	2	sp|P35579|MYH9_HUMAN	QIATLHAQVADMK	iTRAQ8plex@N-term; iTRAQ8plex(K)@13		2033.16	2	99	13	4.73252	0.480719	8	54.952	55.0244
143	2	sp|P35579|MYH9_HUMAN	QLEEAEEEAQR	iTRAQ8plex@N-term		1634.81	1	99	14	3.74943	1	5	51.5479	51.6517
144	2	sp|P35579|MYH9_HUMAN	QLLQANPILEAFGNAK	Gln->pyro-Glu@N-term; iTRAQ8plex(K)@16		2013.12	2	99	10	4.57444	0.112689	2	85.7937	85.824
145	2	sp|P35579|MYH9_HUMAN	QLLQANPILEAFGNAK	iTRAQ8plex@N-term; iTRAQ8plex(K)@16		2334.35	2	99	14	5.28893	0.58395	13	76.6239	76.8636
146	2	sp|P35579|MYH9_HUMAN	QLLQANPILEAFGNAK	iTRAQ8plex@N-term; Deamidated(N)@14; iTRAQ8plex(K)@16		2335.34	3	99	15	5.00451	0.303361	19	74.748	74.8491
147	2	sp|P35579|MYH9_HUMAN	QTLENERGELANEVK	Gln->pyro-Glu@N-term; iTRAQ8plex(K)@15	missed R-G@7	2016.04	3	99	11	4.34686	1	4	54.6247	54.5876
148	2	sp|P35579|MYH9_HUMAN	RGDLPFVVPR	iTRAQ8plex@N-term	missed R-G@1	1458.86	2	98.11	11	4.65097	1	3	55.874	55.8164
149	2	sp|P35579|MYH9_HUMAN	SMAVAAR	iTRAQ8plex@N-term		1008.57	1	98.85	11	3.45803	1	1	39.6343	39.5961
150	2	sp|P35579|MYH9_HUMAN	SMEAEMIQLQEELAAAER	iTRAQ8plex@N-term		2352.16	1	99	24	5.64321	0.781112	26	79.644	79.6676
151	2	sp|P35579|MYH9_HUMAN	SMEAEMIQLQEELAAAER	iTRAQ8plex@N-term; Deamidated(Q)@8		2353.14	2	99	18	4.79585	0.111008	3	77.3943	77.678
152	2	sp|P35579|MYH9_HUMAN	SMEAEMIQLQEELAAAER	iTRAQ8plex@N-term; Oxidation(M)@2		2368.16	2	99	17	4.78344	0.10788	8	69.0865	69.1001
153	2	sp|P35579|MYH9_HUMAN	TELEDTLDSTAAQQELR	iTRAQ8plex@N-term		2223.12	1	99	19	4.80829	1	7	63.4897	63.6357
154	2	sp|P35579|MYH9_HUMAN	TEMEDLMSSK	iTRAQ8plex@N-term; iTRAQ8plex(K)@10		1777.91	2	99	10	4.47534	1	2	59.5392	59.4664
155	2	sp|P35579|MYH9_HUMAN	THEAQIQEMR	iTRAQ8plex@N-term		1545.79	1	99	15	3.58715	1	6	42.2911	42.3131
156	2	sp|P35579|MYH9_HUMAN	TQLEELEDELQATEDAK	iTRAQ8plex@N-term; iTRAQ8plex(K)@17		2569.32	2	99	20	5.79214	1	19	72.466	72.5209
157	2	sp|P35579|MYH9_HUMAN	VEAQLQELQVK	iTRAQ8plex@N-term; iTRAQ8plex(K)@11		1892.12	2	99	9	4.64132	1	4	62.2564	62.1909
158	2	sp|P35579|MYH9_HUMAN	VEDMAELTCLNEASVLHNLK	iTRAQ8plex@N-term; Methylthio(C)@9; iTRAQ8plex(K)@20		2882.48	3	99	14	4.49383	0.536203	2	80.2599	80.2399
159	2	sp|P35579|MYH9_HUMAN	VEDMAELTCLNEASVLHNLK	iTRAQ8plex@N-term; Methylthio(C)@9; Deamidated(N)@11; iTRAQ8plex(K)@20		2883.46	4	97.47	11	4.43083	0.463797	1	80.1402	80.1219
160	2	sp|P35579|MYH9_HUMAN	VEEEAAQK	iTRAQ8plex@N-term; iTRAQ8plex(K)@8		1510.85	2	99	12	3.60163	1	6	44.3475	44.308
161	2	sp|P35579|MYH9_HUMAN	VISGVLQLGNIVFK	iTRAQ8plex@N-term; iTRAQ8plex(K)@14		2094.3	2	99	10	5.39216	1	82	84.5118	84.7155
162	2	sp|P35579|MYH9_HUMAN	VSHLLGINVTDFTR	iTRAQ8plex@N-term		1875.05	1	99	15	4.75155	1	3	68.3799	68.4051
163	2	sp|P35579|MYH9_HUMAN	VVFQEFR	iTRAQ8plex@N-term		1227.69	1	99	9	4.66781	1	8	59.9146	59.9751
164	3	sp|Q9Y490|TLN1_HUMAN	AGALQCSPSDAYTK	iTRAQ8plex@N-term; Methylthio(C)@6; iTRAQ8plex(K)@14		2065.04	3	99	12	4.31205	1	3	56.681	56.6016
165	3	sp|Q9Y490|TLN1_HUMAN	AIAVTVQEMVTK	iTRAQ8plex@N-term; iTRAQ8plex(K)@12		1897.12	2	99	12	4.44784	0.80112	13	69.3628	69.3831
166	3	sp|Q9Y490|TLN1_HUMAN	AIAVTVQEMVTK	iTRAQ8plex@N-term; Deamidated(Q)@7; iTRAQ8plex(K)@12		1898.1	3	99	10	3.84273	0.19888	1	68.3793	68.4975
167	3	sp|Q9Y490|TLN1_HUMAN	ALDGAFTEENR	iTRAQ8plex@N-term		1525.77	1	99	12	3.86279	1	3	54.0286	54.104
168	3	sp|Q9Y490|TLN1_HUMAN	ALGDLISATK	iTRAQ8plex@N-term; iTRAQ8plex(K)@10		1595.97	2	99	13	4.59106	1	18	64.992	64.9802
169	3	sp|Q9Y490|TLN1_HUMAN	ALSTDPAAPNLK	iTRAQ8plex@N-term; iTRAQ8plex(K)@12		1805.05	2	98.98	10	3.88485	1	6	53.0503	53.0333
170	3	sp|Q9Y490|TLN1_HUMAN	APGQLECETAIAALNSCLR	iTRAQ8plex@N-term; Methylthio(C)@7; Methylthio(C)@17		2355.14	3	99	11	4.30423	1	1	92.4536	92.5022
171	3	sp|Q9Y490|TLN1_HUMAN	AQEACGPLEMDSALSVVQNLEK	iTRAQ8plex@N-term; Methylthio(C)@5; iTRAQ8plex(K)@22		2985.51	3	99	17	4.41895	1	6	80.6257	80.5891
172	3	sp|Q9Y490|TLN1_HUMAN	ASSLIEEAK	iTRAQ8plex@N-term; iTRAQ8plex(K)@9		1554.91	2	99	12	4.56213	1	8	54.7846	54.7665
173	3	sp|Q9Y490|TLN1_HUMAN	ASVPTIQDQASAMQLSQCAK	iTRAQ8plex@N-term; Methylthio(C)@18; iTRAQ8plex(K)@20		2730.4	3	99	13	4.57673	0.539612	2	64.1009	64.1532
174	3	sp|Q9Y490|TLN1_HUMAN	ASVPTIQDQASAMQLSQCAK	iTRAQ8plex@N-term; Deamidated(Q)@9; Methylthio(C)@18; iTRAQ8plex(K)@20		2731.38	4	99	14	4.50777	0.460388	4	63.7131	63.8086
175	3	sp|Q9Y490|TLN1_HUMAN	AVASAAAALVLK	iTRAQ8plex@N-term; iTRAQ8plex(K)@12		1692.08	2	99	14	5.34203	1	17	67.5114	68.0008
176	3	sp|Q9Y490|TLN1_HUMAN	AVAEQIPLLVQGVR	iTRAQ8plex@N-term		1796.08	1	99	11	4.53481	1	2	69.3561	69.4276
177	3	sp|Q9Y490|TLN1_HUMAN	AVEGCVSASQAATEDGQLLR	iTRAQ8plex@N-term; Methylthio(C)@5		2354.15	2	99	19	4.84469	0.64603	14	69.2793	69.2059
178	3	sp|Q9Y490|TLN1_HUMAN	AVEGCVSASQAATEDGQLLR	iTRAQ8plex@N-term; Methylthio(C)@5; Deamidated(Q)@10		2355.14	3	99	17	4.5834	0.35397	3	67.6468	67.8404
179	3	sp|Q9Y490|TLN1_HUMAN	AVGDASK	iTRAQ8plex@N-term; iTRAQ8plex(K)@7		1254.74	2	97.9	11	3.55787	1	2	38.8936	38.8543
180	3	sp|Q9Y490|TLN1_HUMAN	AVSSAIAQLLGEVAQGNENYAGIAAR	iTRAQ8plex@N-term		2876.53	1	99	17	5.2312	0.205352	14	86.9909	87.278
181	3	sp|Q9Y490|TLN1_HUMAN	AVSSAIAQLLGEVAQGNENYAGIAAR	iTRAQ8plex@N-term; Deamidated(N)@19		2877.51	2	99	18	5.81888	0.794648	1	88.8012	88.9489
182	3	sp|Q9Y490|TLN1_HUMAN	AVTDSINQLITMCTQQAPGQK	iTRAQ8plex@N-term; Methylthio(C)@13; iTRAQ8plex(K)@21		2900.5	3	99	20	5.4059	0.83757	25	85.5334	85.5871
183	3	sp|Q9Y490|TLN1_HUMAN	AVTDSINQLITMCTQQAPGQK	iTRAQ8plex@N-term; Oxidation(M)@12; Methylthio(C)@13; iTRAQ8plex(K)@21		2916.5	4	99	11	4.69354	0.16243	3	80.071	80.0499
184	3	sp|Q9Y490|TLN1_HUMAN	DKAPGQLECETAIAALNSCLR	iTRAQ8plex@N-term; iTRAQ8plex(K)@2; Methylthio(C)@9; Methylthio(C)@19	missed K-A@2	2902.46	5	99	11	5.32293	1	10	84.6999	84.6834
185	3	sp|Q9Y490|TLN1_HUMAN	EADESLNFEEQILEAAK	iTRAQ8plex@N-term; iTRAQ8plex(K)@17		2543.32	2	99	16	5.44006	1	16	73.7374	73.7236
186	3	sp|Q9Y490|TLN1_HUMAN	ECANGYLELLDHVLLTLQKPSPELK	iTRAQ8plex@N-term; Methylthio(C)@2; iTRAQ8plex(K)@19; iTRAQ8plex(K)@25		3781.09	4	99	12	5.0859	0.671795	2	86.016	85.9914
187	3	sp|Q9Y490|TLN1_HUMAN	ECANGYLELLDHVLLTLQKPSPELK	iTRAQ8plex@N-term; Methylthio(C)@2; Deamidated(N)@4; iTRAQ8plex(K)@19; iTRAQ8plex(K)@25		3782.08	5	99	15	4.77481	0.328205	23	85.7581	85.6319
188	3	sp|Q9Y490|TLN1_HUMAN	ERIPEAPAGPPSDFGLFLSDDDPK	iTRAQ8plex@N-term; iTRAQ8plex(K)@24	missed R-I@2	3177.64	3	99	15	4.81513	1	3	67.0143	67.0312
189	3	sp|Q9Y490|TLN1_HUMAN	EVANSTANLVK	iTRAQ8plex@N-term; iTRAQ8plex(K)@11		1753.02	2	99	9	3.87157	1	2	51.7796	51.837
190	3	sp|Q9Y490|TLN1_HUMAN	EVIQEWNLTNIK	iTRAQ8plex@N-term; iTRAQ8plex(K)@12		2094.19	2	99	15	4.72104	1	10	66.7832	66.745
191	3	sp|Q9Y490|TLN1_HUMAN	FGQDFSTFLEAGVEMAGQAPSQEDR	iTRAQ8plex@N-term		3020.41	1	99	21	5.5021	1	18	84.5734	84.4922
192	3	sp|Q9Y490|TLN1_HUMAN	GLAGAVSELLR	iTRAQ8plex@N-term		1388.83	1	99	17	5.56731	1	26	72.8913	72.9716
193	3	sp|Q9Y490|TLN1_HUMAN	GSQAQPDSPSAQLALIAASQSFLQPGGK	iTRAQ8plex@N-term; iTRAQ8plex(K)@28		3361.81	2	99	16	5.18586	1	5	76.4941	76.6392
194	3	sp|Q9Y490|TLN1_HUMAN	GTEWVDPEDPTVIAENELLGAAAAIEAAAK	iTRAQ8plex@N-term; iTRAQ8plex(K)@30		3658.92	2	99	21	4.84647	0.784305	14	93.8608	94.0434
195	3	sp|Q9Y490|TLN1_HUMAN	GTEWVDPEDPTVIAENELLGAAAAIEAAAK	iTRAQ8plex@N-term; Deamidated(N)@16; iTRAQ8plex(K)@30		3659.9	3	99	11	4.28583	0.215695	2	94.243	94.0006
196	3	sp|Q9Y490|TLN1_HUMAN	GVAALTSDPAVQAIVLDTASDVLDK	iTRAQ8plex@N-term; iTRAQ8plex(K)@25		3076.71	2	99	18	4.58244	1	12	86.1207	86.2149
197	3	sp|Q9Y490|TLN1_HUMAN	GVGAAATAVTQALNELLQHVK	iTRAQ8plex@N-term; iTRAQ8plex(K)@21		2698.56	2	99	19	6.25566	0.706413	20	89.9041	89.4548
198	3	sp|Q9Y490|TLN1_HUMAN	GVGAAATAVTQALNELLQHVK	iTRAQ8plex@N-term; Deamidated(N)@14; iTRAQ8plex(K)@21		2699.54	3	99	9	5.87434	0.293587	2	90.9175	90.5593
199	3	sp|Q9Y490|TLN1_HUMAN	ILAQATSDLVNAIK	iTRAQ8plex@N-term; iTRAQ8plex(K)@14		2064.24	2	99	12	4.68731	1	25	81.7696	81.7966
200	3	sp|Q9Y490|TLN1_HUMAN	IPEAPAGPPSDFGLFLSDDDPK	iTRAQ8plex@N-term; iTRAQ8plex(K)@22		2892.5	2	99	12	4.8546	1	15	72.6348	72.6862
201	3	sp|Q9Y490|TLN1_HUMAN	LADVVK	iTRAQ8plex@N-term; iTRAQ8plex(K)@6		1251.8	2	97.47	6	3.70044	1	4	54.1864	54.2676
202	3	sp|Q9Y490|TLN1_HUMAN	LAQAAQSSVATITR	iTRAQ8plex@N-term		1719.98	1	99	13	4.55362	1	2	62.4851	62.5955
203	3	sp|Q9Y490|TLN1_HUMAN	LGAASLGAEDPETQVVLINAVK	iTRAQ8plex@N-term; iTRAQ8plex(K)@22		2802.6	2	99	20	4.9866	0.753202	8	71.1213	71.1283
204	3	sp|Q9Y490|TLN1_HUMAN	LGAASLGAEDPETQVVLINAVK	iTRAQ8plex@N-term; Deamidated(N)@19; iTRAQ8plex(K)@22		2803.58	3	99	15	4.50203	0.246798	7	69.0954	69.1173
205	3	sp|Q9Y490|TLN1_HUMAN	LHTDDELNWLDHGR	iTRAQ8plex@N-term		2024	1	99	15	4.58409	1	5	57.805	57.7911
206	3	sp|Q9Y490|TLN1_HUMAN	LLAALLEDEGGSGRPLLQAAK	iTRAQ8plex@N-term; iTRAQ8plex(K)@21		2729.59	2	99	11	5.00642	0.785057	21	76.1222	76.1072
207	3	sp|Q9Y490|TLN1_HUMAN	LLAALLEDEGGSGRPLLQAAK	iTRAQ8plex@N-term; Deamidated(Q)@18; iTRAQ8plex(K)@21		2730.57	3	99	12	4.44384	0.214943	1	76.3291	76.2212
208	3	sp|Q9Y490|TLN1_HUMAN	LNEAAAGLNQAATELVQASR	iTRAQ8plex@N-term		2330.25	1	99	17	5.01306	1	6	79.7384	79.9332
209	3	sp|Q9Y490|TLN1_HUMAN	NLGTALAELR	iTRAQ8plex@N-term		1360.8	1	99	11	4.6578	1	5	64.0468	64.127
210	3	sp|Q9Y490|TLN1_HUMAN	QNLLQAAGNVGQASGELLQQIGESDTDPHFQDALMQLAK	Gln->pyro-Glu@N-term; iTRAQ8plex(K)@39		4422.21	2	99	15	5.36468	0.512106	6	92.3092	92.4031
211	3	sp|Q9Y490|TLN1_HUMAN	QNLLQAAGNVGQASGELLQQIGESDTDPHFQDALMQLAK	iTRAQ8plex@N-term; iTRAQ8plex(K)@39		4743.44	2	99	14	5.30563	0.447002	6	86.0659	86.1708
212	3	sp|Q9Y490|TLN1_HUMAN	QNLLQAAGNVGQASGELLQQIGESDTDPHFQDALMQLAK	iTRAQ8plex@N-term; Deamidated(N)@2; iTRAQ8plex(K)@39		4744.42	3	99	11	3.83168	0.0150092	1	88.1869	88.1955
213	3	sp|Q9Y490|TLN1_HUMAN	QNLLQAAGNVGQASGELLQQIGESDTDPHFQDALMQLAK	iTRAQ8plex@N-term; Oxidation(M)@35; iTRAQ8plex(K)@39		4759.43	3	98.39	10	4.06833	0.0258829	1	84.6693	84.7278
214	3	sp|Q9Y490|TLN1_HUMAN	SNTSPEELGPLANQLTSDYGR	iTRAQ8plex@N-term		2552.27	1	99	19	4.91223	1	7	66.7754	66.6922
215	3	sp|Q9Y490|TLN1_HUMAN	TLAESALQLLYTAK	iTRAQ8plex@N-term; iTRAQ8plex(K)@14		2129.26	2	99	17	5.84806	0.588762	46	80.4024	80.4698
216	3	sp|Q9Y490|TLN1_HUMAN	TLAESALQLLYTAK	iTRAQ8plex@N-term; Deamidated(Q)@8; iTRAQ8plex(K)@14		2130.24	3	99	17	5.69221	0.411238	2	78.7942	78.6401
217	3	sp|Q9Y490|TLN1_HUMAN	TMLESAGGLIQTAR	iTRAQ8plex@N-term		1750.96	1	99	17	5.07302	1	3	63.015	63.0352
218	3	sp|Q9Y490|TLN1_HUMAN	TMQFEPSTMVYDACR	iTRAQ8plex@N-term; Methylthio(C)@14		2127.94	2	99	12	4.51549	1	6	71.038	70.998
219	3	sp|Q9Y490|TLN1_HUMAN	TVTDMLMTICAR	iTRAQ8plex@N-term; Methylthio(C)@10		1703.84	2	99	6	4.4422	1	1	84.4216	84.5035
220	3	sp|Q9Y490|TLN1_HUMAN	VAGSVTELIQAAEAMK	iTRAQ8plex@N-term; iTRAQ8plex(K)@16		2225.26	2	99	17	5.50248	1	29	84.2009	84.178
221	3	sp|Q9Y490|TLN1_HUMAN	VGAIPANALDDGQWSQGLISAAR	iTRAQ8plex@N-term		2613.38	1	99	17	4.83154	1	3	73.7134	73.8117
222	3	sp|Q9Y490|TLN1_HUMAN	VGDDPAVWQLK	iTRAQ8plex@N-term; iTRAQ8plex(K)@11		1835.04	2	99	12	4.26345	1	7	61.1763	61.1375
223	3	sp|Q9Y490|TLN1_HUMAN	VMVTNVTSLLK	iTRAQ8plex@N-term; iTRAQ8plex(K)@11		1812.1	2	99	12	4.96059	0.814952	4	69.1767	69.1164
224	3	sp|Q9Y490|TLN1_HUMAN	VMVTNVTSLLK	iTRAQ8plex@N-term; Deamidated(N)@5; iTRAQ8plex(K)@11		1813.08	3	99	14	4.31675	0.185048	2	68.2125	68.2411
225	3	sp|Q9Y490|TLN1_HUMAN	VSHVLAALQAGNR	iTRAQ8plex@N-term		1638.95	1	99	17	5.16902	1	3	59.459	59.4439
226	3	sp|Q9Y490|TLN1_HUMAN	VSQMAQYFEPLTLAAVGAASK	iTRAQ8plex@N-term; iTRAQ8plex(K)@21		2789.52	2	99	12	4.58993	1	10	83.5261	83.6404
227	3	sp|Q9Y490|TLN1_HUMAN	VVAPTISSPVCQEQLVEAGR	iTRAQ8plex@N-term; Methylthio(C)@11		2432.27	2	99	22	5.18495	1	6	67.585	67.5935
228	3	sp|Q9Y490|TLN1_HUMAN	YDQATDTILTVTENIFSSMGDAGEMVR	iTRAQ8plex@N-term		3267.56	1	99	22	5.14411	0.93934	6	97.5715	97.54
229	3	sp|Q9Y490|TLN1_HUMAN	YDQATDTILTVTENIFSSMGDAGEMVR	iTRAQ8plex@N-term; Oxidation(M)@25		3283.55	2	99	11	3.95419	0.0606602	1	96.7382	96.7435
230	4	sp|P02788|TRFL_HUMAN	ADAVTLDGGFIYEAGLAPYK	iTRAQ8plex@N-term; iTRAQ8plex(K)@20		2678.44	2	99	17	5.553	1	53	74.0263	74.1258
231	4	sp|P02788|TRFL_HUMAN	CAFSSQEPYFSYSGAFK	iTRAQ8plex@N-term; Methylthio(C)@1; iTRAQ8plex(K)@17		2572.22	3	99	19	5.66147	0.787571	21	71.118	71.2189
232	4	sp|P02788|TRFL_HUMAN	CAFSSQEPYFSYSGAFK	iTRAQ8plex@N-term; Methylthio(C)@1; Deamidated(Q)@6; iTRAQ8plex(K)@17		2573.21	4	99	12	5.09239	0.212429	2	69.7473	69.8227
233	4	sp|P02788|TRFL_HUMAN	CGLVPVLAENYK	iTRAQ8plex@N-term; Methylthio(C)@1; iTRAQ8plex(K)@12		1959.08	3	99	15	5.56875	0.97786	39	72.6281	72.7449
234	4	sp|P02788|TRFL_HUMAN	CGLVPVLAENYK	iTRAQ8plex@N-term; Methylthio(C)@1; Deamidated(N)@10; iTRAQ8plex(K)@12		1960.06	4	99	11	3.92366	0.0221403	3	71.0549	71.1236
235	4	sp|P02788|TRFL_HUMAN	CLAENAGDVAFVK	iTRAQ8plex@N-term; Methylthio(C)@1; iTRAQ8plex(K)@13		1990.05	3	99	16	5.55562	0.825492	23	64.3365	64.136
236	4	sp|P02788|TRFL_HUMAN	CLAENAGDVAFVK	iTRAQ8plex@N-term; Methylthio(C)@1; Deamidated(N)@5; iTRAQ8plex(K)@13		1991.03	4	99	11	4.88073	0.174508	3	64.7113	64.8193
237	4	sp|P02788|TRFL_HUMAN	CSTSPLLEACEFLR	iTRAQ8plex@N-term; Methylthio(C)@1; Methylthio(C)@10		1963.92	3	99	20	6.18701	1	19	86.6428	86.7038
238	4	sp|P02788|TRFL_HUMAN	DGAGDVAFIR	iTRAQ8plex@N-term		1323.71	1	99	14	4.7278	1	27	53.9975	54.0311
239	4	sp|P02788|TRFL_HUMAN	DSAIGFSR	iTRAQ8plex@N-term		1155.62	1	99	13	4.32123	1	6	47.6718	47.7684
240	4	sp|P02788|TRFL_HUMAN	DSPIQCIQAIAENR	iTRAQ8plex@N-term; Methylthio(C)@6		1906.95	2	99	18	6.0664	0.974145	20	77.0988	77.3953
241	4	sp|P02788|TRFL_HUMAN	DSPIQCIQAIAENR	iTRAQ8plex@N-term; Methylthio(C)@6; Deamidated(N)@13		1907.94	3	99	10	4.49031	0.0258545	8	76.7274	76.7377
242	4	sp|P02788|TRFL_HUMAN	DVTVLQNTDGNNNEAWAK	iTRAQ8plex@N-term; iTRAQ8plex(K)@18		2596.33	2	99	14	4.65064	0.762286	11	57.4496	57.5005
243	4	sp|P02788|TRFL_HUMAN	DVTVLQNTDGNNNEAWAK	iTRAQ8plex@N-term; Deamidated(N)@13; iTRAQ8plex(K)@18		2597.32	3	99	13	4.14457	0.237714	10	58.1265	58.1317
244	4	sp|P02788|TRFL_HUMAN	EDAIWNLLR	iTRAQ8plex@N-term		1432.8	1	99	15	5.86605	0.901653	80	75.4269	75.5384
245	4	sp|P02788|TRFL_HUMAN	EDAIWNLLR	iTRAQ8plex@N-term; Deamidated(N)@6		1433.78	2	99	12	4.90377	0.0983474	2	74.3559	74.3331
246	4	sp|P02788|TRFL_HUMAN	ESTVFEDLSDEAERDEYELLCPDNTR	iTRAQ8plex@N-term; Methylthio(C)@21	missed R-D@14	3424.52	3	99	13	5.43406	0.522577	37	82.056	82.2912
247	4	sp|P02788|TRFL_HUMAN	ESTVFEDLSDEAERDEYELLCPDNTR	iTRAQ8plex@N-term; Methylthio(C)@21; Deamidated(N)@24	missed R-D@14	3425.51	4	99	14	5.39481	0.477423	20	82.1511	82.1563
248	4	sp|P02788|TRFL_HUMAN	FCLFQSETK	iTRAQ8plex@N-term; Methylthio(C)@2; iTRAQ8plex(K)@9		1755.91	3	99	11	5.57568	1	9	67.2583	67.3337
249	4	sp|P02788|TRFL_HUMAN	FDEYFSQSCAPGSDPR	iTRAQ8plex@N-term; Methylthio(C)@9		2154.93	2	99	15	5.99133	1	15	67.895	68.0008
250	4	sp|P02788|TRFL_HUMAN	FFSASCVPGADK	iTRAQ8plex@N-term; Methylthio(C)@6; iTRAQ8plex(K)@12		1881.96	3	99	12	4.91817	1	22	65.8489	65.9296
251	4	sp|P02788|TRFL_HUMAN	FFSASCVPGADKGQFPNLCR	iTRAQ8plex@N-term; Methylthio(C)@6; iTRAQ8plex(K)@12; Methylthio(C)@19	missed K-G@12	2843.38	5	99	14	5.30859	1	3	73.6471	73.7529
252	4	sp|P02788|TRFL_HUMAN	FQLFGSPSGQK	iTRAQ8plex@N-term; iTRAQ8plex(K)@11		1803.01	2	99	14	5.26496	0.885478	33	62.1121	62.2361
253	4	sp|P02788|TRFL_HUMAN	FQLFGSPSGQK	iTRAQ8plex@N-term; Deamidated(Q)@10; iTRAQ8plex(K)@11		1804	3	99	11	4.37667	0.114522	1	62.0233	62.2264
254	4	sp|P02788|TRFL_HUMAN	GEADAMSLDGGYVYTAGK	iTRAQ8plex@N-term; iTRAQ8plex(K)@18		2412.21	2	99	19	5.50473	0.954561	16	60.2701	60.3192
255	4	sp|P02788|TRFL_HUMAN	GEADAMSLDGGYVYTAGK	iTRAQ8plex@N-term; Oxidation(M)@6; iTRAQ8plex(K)@18		2428.2	3	99	11	4.18236	0.0454391	5	55.4792	55.4961
256	4	sp|P02788|TRFL_HUMAN	GGSFQLNELQGLK	iTRAQ8plex@N-term; iTRAQ8plex(K)@13		1998.14	2	99	18	4.82155	1	15	64.3446	64.3498
257	4	sp|P02788|TRFL_HUMAN	GPPVSCIK	iTRAQ8plex@N-term; Methylthio(C)@6; iTRAQ8plex(K)@8		1453.82	3	99	10	4.26647	1	8	55.0468	55.0355
258	4	sp|P02788|TRFL_HUMAN	GQFPNLCR	iTRAQ8plex@N-term; Methylthio(C)@7		1283.64	2	99	10	5.02915	1	26	59.052	59.0393
259	4	sp|P02788|TRFL_HUMAN	IDSGLYLGSGYFTAIQNLR	iTRAQ8plex@N-term		2391.27	1	99	23	6.03015	0.945804	56	80.8969	80.8226
260	4	sp|P02788|TRFL_HUMAN	IDSGLYLGSGYFTAIQNLR	iTRAQ8plex@N-term; Deamidated(N)@17		2392.26	2	99	19	4.78832	0.0541962	9	76.761	76.7377
261	4	sp|P02788|TRFL_HUMAN	KCSTSPLLEACEFLR	iTRAQ8plex@N-term; iTRAQ8plex(K)@1; Methylthio(C)@2; Methylthio(C)@11	missed K-C@1	2396.22	5	99	14	5.20832	1	8	77.2025	77.1891
262	4	sp|P02788|TRFL_HUMAN	KSEEEVAAR	iTRAQ8plex@N-term; iTRAQ8plex(K)@1	missed K-S@1	1625.92	3	99	13	3.51574	1	14	39.7963	39.758
263	4	sp|P02788|TRFL_HUMAN	LADFALLCLDGK	iTRAQ8plex@N-term; Methylthio(C)@8; iTRAQ8plex(K)@12		1932.07	3	99	12	6.49957	1	76	87.9172	88.0807
264	4	sp|P02788|TRFL_HUMAN	LCAGTGENK	iTRAQ8plex@N-term; Methylthio(C)@2; iTRAQ8plex(K)@9		1545.81	3	99	12	4.28108	1	4	51.1272	51.2403
265	4	sp|P02788|TRFL_HUMAN	LRPVAAEVYGTER	iTRAQ8plex@N-term		1763.98	1	99	19	5.5381	1	18	52.706	52.802
266	4	sp|P02788|TRFL_HUMAN	NLLFNDNTECLAR	iTRAQ8plex@N-term; Methylthio(C)@10		1871.92	2	99	18	5.69777	0.851815	12	66.4582	66.6017
267	4	sp|P02788|TRFL_HUMAN	NLLFNDNTECLAR	iTRAQ8plex@N-term; Deamidated(N)@5; Methylthio(C)@10		1872.9	3	99	14	4.93822	0.148185	22	66.5021	66.5762
268	4	sp|P02788|TRFL_HUMAN	QVLLHQQAK	Gln->pyro-Glu@N-term; iTRAQ8plex(K)@9		1350.79	2	99	14	4.16259	0.717118	7	48.7752	48.7804
269	4	sp|P02788|TRFL_HUMAN	QVLLHQQAK	iTRAQ8plex@N-term; iTRAQ8plex(K)@9		1672.02	2	99	14	3.75861	0.282882	14	46.2505	46.346
270	4	sp|P02788|TRFL_HUMAN	RDSPIQCIQAIAENR	iTRAQ8plex@N-term; Methylthio(C)@7	missed R-D@1	2063.06	3	99	14	5.20877	1	5	67.6433	67.5247
271	4	sp|P02788|TRFL_HUMAN	RSDTSLTWNSVK	iTRAQ8plex@N-term; iTRAQ8plex(K)@12	missed R-S@1	2001.11	3	99	13	3.92059	1	9	51.3722	51.3774
272	4	sp|P02788|TRFL_HUMAN	SCHLAMAPNHAVVSR	iTRAQ8plex@N-term; Methylthio(C)@2		1941.96	2	99	17	3.99913	1	5	49.7977	49.7794
273	4	sp|P02788|TRFL_HUMAN	SDTSLTWNSVK	iTRAQ8plex@N-term; iTRAQ8plex(K)@11		1845.01	2	99	12	4.63234	0.687407	7	55.2031	55.2166
274	4	sp|P02788|TRFL_HUMAN	SDTSLTWNSVK	iTRAQ8plex@N-term; Deamidated(N)@8; iTRAQ8plex(K)@11		1845.99	3	99	10	4.2901	0.312593	4	54.7363	54.6624
275	4	sp|P02788|TRFL_HUMAN	SNLCALCIGDEQGENK	iTRAQ8plex@N-term; Methylthio(C)@4; Methylthio(C)@7; iTRAQ8plex(K)@16		2393.13	4	99	14		0	14	74.0761	74.0365
276	4	sp|P02788|TRFL_HUMAN	SNLCALCIGDEQGENK	iTRAQ8plex@N-term; Deamidated(N)@2; Methylthio(C)@4; Methylthio(C)@7; iTRAQ8plex(K)@16		2394.11	5	99	14	4.51768	1	6	76.9745	76.9466
277	4	sp|P02788|TRFL_HUMAN	SQQSSDPDPNCVDRPVEGYLAVAVVR	iTRAQ8plex@N-term; Methylthio(C)@11		3150.54	2	99	17	5.40361	1	9	65.4666	65.5221
278	4	sp|P02788|TRFL_HUMAN	SVNGKEDAIWNLLR	iTRAQ8plex@N-term; Deamidated(N)@3; iTRAQ8plex(K)@5	missed K-E@5	2223.25	4	99	16	6.02389	1	70	69.8423	69.6944
279	4	sp|P02788|TRFL_HUMAN	SVQWCAVSQPEATK	iTRAQ8plex@N-term; Methylthio(C)@5; iTRAQ8plex(K)@14		2187.13	3	99	16	5.39299	1	9	60.1164	60.1233
280	4	sp|P02788|TRFL_HUMAN	TAGWNVPIGTLRPFLNWTGPPEPIEAAVAR	iTRAQ8plex@N-term		3533.91	1	99	16	4.89171	1	5	81.1584	81.2168
281	4	sp|P02788|TRFL_HUMAN	THYYAVAVVK	iTRAQ8plex@N-term; iTRAQ8plex(K)@10		1758.03	2	99	15	4.28697	1	19	50.9126	50.9668
282	4	sp|P02788|TRFL_HUMAN	VPSHAVVAR	iTRAQ8plex@N-term		1238.74	1	99	13	3.78118	1	8	40.3667	40.3287
283	4	sp|P02788|TRFL_HUMAN	VVWCAVGEQELR	iTRAQ8plex@N-term; Methylthio(C)@4		1737.88	2	99	12	5.66374	1	10	72.446	72.6102
284	4	sp|P02788|TRFL_HUMAN	YLGPQYVAGITNLK	iTRAQ8plex@N-term; iTRAQ8plex(K)@14		2144.25	2	99	15	5.68124	0.84745	21	67.2613	67.1871
285	4	sp|P02788|TRFL_HUMAN	YLGPQYVAGITNLK	iTRAQ8plex@N-term; Deamidated(N)@12; iTRAQ8plex(K)@14		2145.23	3	99	16	4.93654	0.15255	6	66.2779	66.2948
286	4	sp|P02788|TRFL_HUMAN	YYGYTGAFR	iTRAQ8plex@N-term		1400.7	1	99	14	4.95849	1	13	56.5363	56.5864
287	5	sp|P12814|ACTN1_HUMAN	ACLISLGYDIGNDPQGEAEFAR	iTRAQ8plex@N-term; Methylthio(C)@2		2688.28	2	99	21	5.26266	0.889818	13	77.6541	77.7534
288	5	sp|P12814|ACTN1_HUMAN	ACLISLGYDIGNDPQGEAEFAR	iTRAQ8plex@N-term; Methylthio(C)@2; Deamidated(Q)@15		2689.27	3	99	11	4.35547	0.110182	2	77.0121	77.0291
289	5	sp|P12814|ACTN1_HUMAN	AGTQIENIEEDFR	iTRAQ8plex@N-term		1824.92	1	99	15	4.79102	1	4	65.2001	65.2498
290	5	sp|P12814|ACTN1_HUMAN	AGTQIENIEEDFRDGLK	iTRAQ8plex@N-term; iTRAQ8plex(K)@17	missed R-D@13	2542.35	3	99	9	5.06718	1	5	67.7615	67.7883
291	5	sp|P12814|ACTN1_HUMAN	AIMTYVSSFYHAFSGAQK	iTRAQ8plex@N-term; iTRAQ8plex(K)@18		2615.37	2	99	8	4.68459	1	1	81.1594	81.2375
292	5	sp|P12814|ACTN1_HUMAN	ALDFIASK	iTRAQ8plex@N-term; iTRAQ8plex(K)@8		1471.89	2	99	11	4.94022	1	16	63.5757	63.6564
293	5	sp|P12814|ACTN1_HUMAN	CQLEINFNTLQTK	iTRAQ8plex@N-term; Methylthio(C)@1; iTRAQ8plex(K)@13		2205.17	3	99	15	4.85043	1	6	70.0734	70.0034
294	5	sp|P12814|ACTN1_HUMAN	DDPLTNLNTAFDVAEK	iTRAQ8plex@N-term; iTRAQ8plex(K)@16		2370.25	2	99	10	4.64654	1	4	68.8426	68.8293
295	5	sp|P12814|ACTN1_HUMAN	DGLGFCALIHR	iTRAQ8plex@N-term; Methylthio(C)@6		1550.8	2	99	15	5.20584	1	6	68.9503	69.0288
296	5	sp|P12814|ACTN1_HUMAN	DYETATLSEIK	iTRAQ8plex@N-term; iTRAQ8plex(K)@11		1877.02	2	99	11	4.40175	1	1	57.3923	57.4091
297	5	sp|P12814|ACTN1_HUMAN	EGLLLWCQR	iTRAQ8plex@N-term; Methylthio(C)@7		1466.77	2	99	14	5.42471	0.571236	27	73.0308	72.7907
298	5	sp|P12814|ACTN1_HUMAN	EGLLLWCQR	iTRAQ8plex@N-term; Methylthio(C)@7; Deamidated(Q)@8		1467.75	3	99	11	5.30011	0.428764	3	72.8678	72.7907
299	5	sp|P12814|ACTN1_HUMAN	ETADTDTADQVMASFK	iTRAQ8plex@N-term; Deamidated(Q)@10; iTRAQ8plex(K)@16		2338.15	3	99	11	4.60871	1	1	63.0946	63.0799
300	5	sp|P12814|ACTN1_HUMAN	GISQEQMNEFR	iTRAQ8plex@N-term		1641.81	1	99	12	3.80808	1	5	53.0863	53.0916
301	5	sp|P12814|ACTN1_HUMAN	GYEEWLLNEIR	iTRAQ8plex@N-term		1724.9	1	99	17	5.84116	0.911198	25	74.1615	74.2591
302	5	sp|P12814|ACTN1_HUMAN	GYEEWLLNEIR	iTRAQ8plex@N-term; Deamidated(N)@8		1725.89	2	99	11	4.82997	0.088802	9	69.1604	69.1455
303	5	sp|P12814|ACTN1_HUMAN	ICDQWDNLGALTQK	iTRAQ8plex@N-term; Methylthio(C)@2; iTRAQ8plex(K)@14		2258.16	3	99	15	5.36763	1	37	75.4792	75.6263
304	5	sp|P12814|ACTN1_HUMAN	IDQLEGDHQLIQEALIFDNK	iTRAQ8plex@N-term; iTRAQ8plex(K)@20		2946.59	2	99	21	4.84969	0.881908	16	74.5633	74.6145
305	5	sp|P12814|ACTN1_HUMAN	IDQLEGDHQLIQEALIFDNK	iTRAQ8plex@N-term; Deamidated(Q)@9; iTRAQ8plex(K)@20		2947.58	3	99	16	3.97649	0.118092	2	74.5649	74.6145
306	5	sp|P12814|ACTN1_HUMAN	ISIEMHGTLEDQLSHLR	iTRAQ8plex@N-term		2282.2	1	99	15	5.34557	1	6	64.0991	64.0004
307	5	sp|P12814|ACTN1_HUMAN	LASDLLEWIR	iTRAQ8plex@N-term		1518.87	1	99	16	5.99265	1	109	83.5394	83.1917
308	5	sp|P12814|ACTN1_HUMAN	LLETIDQLYLEYAK	iTRAQ8plex@N-term; iTRAQ8plex(K)@14		2319.32	2	99	16	5.67419	1	98	90.3169	90.6474
309	5	sp|P12814|ACTN1_HUMAN	LMLLLEVISGER	iTRAQ8plex@N-term; Oxidation(M)@2		1691.98	2	99	7	3.60799	1	1	94.4539	94.3992
310	5	sp|P12814|ACTN1_HUMAN	MLDAEDIVGTARPDEK	iTRAQ8plex@N-term; iTRAQ8plex(K)@16		2367.26	2	98.03	11	4.89246	1	6	60.5005	60.4804
311	5	sp|P12814|ACTN1_HUMAN	MVSDINNAWGCLEQVEK	iTRAQ8plex@N-term; Methylthio(C)@11; iTRAQ8plex(K)@17		2589.29	3	99	16	5.27705	0.774978	17	81.4831	81.451
312	5	sp|P12814|ACTN1_HUMAN	MVSDINNAWGCLEQVEK	iTRAQ8plex@N-term; Deamidated(N)@6; Methylthio(C)@11; iTRAQ8plex(K)@17		2590.27	4	99	17	4.73998	0.225022	14	73.9397	73.95
313	5	sp|P12814|ACTN1_HUMAN	NYITMDELR	iTRAQ8plex@N-term		1457.75	1	99	10	4.04246	1	3	58.5105	58.519
314	5	sp|P12814|ACTN1_HUMAN	QFGAQANVIGPWIQTK	iTRAQ8plex@N-term; iTRAQ8plex(K)@16		2365.34	2	99	15	4.69954	1	8	66.379	66.3489
315	5	sp|P12814|ACTN1_HUMAN	QKDYETATLSEIK	Gln->pyro-Glu@N-term; iTRAQ8plex(K)@2; iTRAQ8plex(K)@13	missed K-D@2	2116.15	4	98.88	12	4.5023	1	5	58.6597	58.6246
316	5	sp|P12814|ACTN1_HUMAN	TINEVENQILTR	iTRAQ8plex@N-term		1732.96	1	99	17	5.33405	1	13	65.0638	65.1155
317	5	sp|P12814|ACTN1_HUMAN	VEQIAAIAQELNELDYYDSPSVNAR	iTRAQ8plex@N-term		3111.57	1	99	18	4.71299	0.874706	13	86.5045	86.3479
318	5	sp|P12814|ACTN1_HUMAN	VEQIAAIAQELNELDYYDSPSVNAR	iTRAQ8plex@N-term; Deamidated(N)@23		3112.55	2	99	15	3.86906	0.125294	3	88.1436	88.0593
319	5	sp|P12814|ACTN1_HUMAN	VGWEQLLTTIAR	iTRAQ8plex@N-term		1689.97	1	99	18	6.67947	1	11	77.2692	77.2795
320	5	sp|P12814|ACTN1_HUMAN	VLAVNQENEQLMEDYEK	iTRAQ8plex@N-term; iTRAQ8plex(K)@17		2659.36	2	99	17	5.01478	1	10	65.6822	65.7025
321	6	sp|P05164|PERM_HUMAN	AVSNEIVR	iTRAQ8plex@N-term		1190.69	1	99	14	4.16313	1	6	45.8397	45.8449
322	6	sp|P05164|PERM_HUMAN	DFVNCSTLPALNLASWR	iTRAQ8plex@N-term; Methylthio(C)@5		2256.13	2	99	10	4.38957	0.090759	16	81.0935	81.1271
323	6	sp|P05164|PERM_HUMAN	DFVNCSTLPALNLASWR	iTRAQ8plex@N-term; Deamidated(N)@4; Methylthio(C)@5		2257.12	3	99	13	5.39036	0.909241	19	82.5798	82.7423
324	6	sp|P05164|PERM_HUMAN	DHGLPGYNAWR	iTRAQ8plex@N-term		1588.81	1	99	13	4.89761	1	6	51.9509	52.0166
325	6	sp|P05164|PERM_HUMAN	DYLPLVLGPTAMR	iTRAQ8plex@N-term		1748.98	1	99	17	5.24316	1	15	70.3789	70.4558
326	6	sp|P05164|PERM_HUMAN	FCGLPQPETVGQLGTVLR	iTRAQ8plex@N-term; Methylthio(C)@2		2264.2	2	99	22	6.14501	1	37	78.0455	77.9317
327	6	sp|P05164|PERM_HUMAN	FPTDQLTPDQER	iTRAQ8plex@N-term		1749.88	1	99	12	4.25737	1	10	55.1715	55.2221
328	6	sp|P05164|PERM_HUMAN	FWWENEGVFSMQQR	iTRAQ8plex@N-term; Oxidation(M)@11		2163.02	2	99	19	5.76008	1	11	72.274	72.3862
329	6	sp|P05164|PERM_HUMAN	IANVFTNAFR	iTRAQ8plex@N-term		1455.81	1	99	12	5.40563	0.855323	28	70.5542	70.5911
330	6	sp|P05164|PERM_HUMAN	IANVFTNAFR	iTRAQ8plex@N-term; Deamidated(N)@7		1456.8	2	99	13	4.6339	0.144677	11	69.3495	69.3388
331	6	sp|P05164|PERM_HUMAN	IGLDLPALNMQR	iTRAQ8plex@N-term		1643.93	1	99	16	5.76466	0.683963	16	70.0601	70.3162
332	6	sp|P05164|PERM_HUMAN	IGLDLPALNMQR	iTRAQ8plex@N-term; Deamidated(N)@9		1644.92	2	99	13	5.37136	0.276521	16	70.6876	70.3162
333	6	sp|P05164|PERM_HUMAN	IGLDLPALNMQR	iTRAQ8plex@N-term; Oxidation(M)@10		1659.93	2	99	12	4.5264	0.0395161	6	65.4057	65.4359
334	6	sp|P05164|PERM_HUMAN	IICDNTGITTVSK	iTRAQ8plex@N-term; Methylthio(C)@3; iTRAQ8plex(K)@13		2018.1	3	99	17	4.65171	1	14	63.0412	63.0915
335	6	sp|P05164|PERM_HUMAN	IKNQADCIPFFR	iTRAQ8plex@N-term; iTRAQ8plex(K)@2; Methylthio(C)@7	missed K-N@2	2105.14	4	99	12	4.71934	1	10	65.233	65.2186
336	6	sp|P05164|PERM_HUMAN	IPCFLAGDTR	iTRAQ8plex@N-term; Methylthio(C)@3		1441.74	2	99	9	5.01368	1	27	69.6049	69.4613
337	6	sp|P05164|PERM_HUMAN	KIVGAMVQIITYRDYLPLVLGPTAMR	iTRAQ8plex@N-term; iTRAQ8plex(K)@1	missed K-I@1; missed R-D@13	3526.04	4	99	8	4.27268	1	1	87.4517	87.3405
338	6	sp|P05164|PERM_HUMAN	KLMEQYGTPNNIDIWMGGVSEPLK	iTRAQ8plex@N-term; iTRAQ8plex(K)@1; iTRAQ8plex(K)@24	missed K-L@1	3631.95	4	99	13	4.89976	1	10	70.0235	70.0774
339	6	sp|P05164|PERM_HUMAN	KLMEQYGTPNNIDIWMGGVSEPLKR	iTRAQ8plex@N-term; iTRAQ8plex(K)@1; iTRAQ8plex(K)@24	missed K-L@1; missed K-R@24	3788.05	5	99	12	4.98616	1	6	66.5235	66.5337
340	6	sp|P05164|PERM_HUMAN	LMEQYGTPNNIDIWMGGVSEPLK	iTRAQ8plex@N-term; iTRAQ8plex(K)@23		3199.65	2	99	11	4.90013	0.522458	10	76.3183	76.3764
341	6	sp|P05164|PERM_HUMAN	LMEQYGTPNNIDIWMGGVSEPLK	iTRAQ8plex@N-term; Deamidated(N)@10; iTRAQ8plex(K)@23		3200.63	3	99	12	4.86109	0.477542	4	76.8127	76.783
342	6	sp|P05164|PERM_HUMAN	LMEQYGTPNNIDIWMGGVSEPLKR	iTRAQ8plex@N-term; iTRAQ8plex(K)@23	missed K-R@23	3355.75	3	99	15	4.60104	1	9	71.5754	71.5822
343	6	sp|P05164|PERM_HUMAN	LYQEAR	iTRAQ8plex@N-term		1082.6	1	99	9	3.81981	1	6	43.7901	43.8086
344	6	sp|P05164|PERM_HUMAN	NGFPVALAR	iTRAQ8plex@N-term; Deamidated(N)@1		1248.71	2	99	8	4.32381	1	14	58.2986	58.2435
345	6	sp|P05164|PERM_HUMAN	NQADCIPFFR	iTRAQ8plex@N-term; Methylthio(C)@5		1559.75	2	99	14	5.39618	0.927738	8	67.8483	67.9299
346	6	sp|P05164|PERM_HUMAN	NQADCIPFFR	iTRAQ8plex@N-term; Deamidated(N)@1; Methylthio(C)@5		1560.74	3	99	13	4.28767	0.0722619	3	71.6336	71.6688
347	6	sp|P05164|PERM_HUMAN	NQINALTSFVDASMVYGSEEPLAR	iTRAQ8plex@N-term		2915.46	1	99	24	5.95186	0.825378	22	81.6092	81.707
348	6	sp|P05164|PERM_HUMAN	NQINALTSFVDASMVYGSEEPLAR	iTRAQ8plex@N-term; Deamidated(N)@4		2916.45	2	99	18	5.18519	0.14125	40	80.0447	80.0947
349	6	sp|P05164|PERM_HUMAN	NQINALTSFVDASMVYGSEEPLAR	iTRAQ8plex@N-term; Oxidation(M)@14		2931.46	2	99	15	4.55858	0.0333713	3	76.0765	76.0399
350	6	sp|P05164|PERM_HUMAN	QALAQISLPR	iTRAQ8plex@N-term		1399.85	1	99	13	4.68999	1	11	59.1123	59.1458
351	6	sp|P05164|PERM_HUMAN	QNQIAVDEIR	iTRAQ8plex@N-term		1488.82	1	99	14	4.11291	1	3	50.6261	50.6934
352	6	sp|P05164|PERM_HUMAN	RFCGLPQPETVGQLGTVLR	iTRAQ8plex@N-term; Methylthio(C)@3	missed R-F@1	2420.3	3	99	17	5.12716	1	8	68.1697	68.1849
353	6	sp|P05164|PERM_HUMAN	RNGFPVALAR	iTRAQ8plex@N-term; Deamidated(N)@2	missed R-N@1	1404.81	3	99	9	4.05751	1	5	52.276	52.0778
354	6	sp|P05164|PERM_HUMAN	SLMFMQWGQLLDHDLDFTPEPAAR	iTRAQ8plex@N-term		3121.53	1	99	14	4.29911	0.6007	27	83.8459	83.8182
355	6	sp|P05164|PERM_HUMAN	SLMFMQWGQLLDHDLDFTPEPAAR	iTRAQ8plex@N-term; Oxidation(M)@5		3137.53	2	99	14	4.12176	0.3993	17	83.2764	83.2816
356	6	sp|P05164|PERM_HUMAN	SSEMPELTSMHTLLLR	iTRAQ8plex@N-term		2148.12	1	99	15	4.86467	1	19	67.2231	67.1871
357	6	sp|P05164|PERM_HUMAN	VFFASWR	iTRAQ8plex@N-term		1215.67	1	99	9	4.82599	1	13	67.8733	67.8198
358	6	sp|P05164|PERM_HUMAN	VGPLLACIIGTQFR	iTRAQ8plex@N-term; Methylthio(C)@7		1837.03	2	99	14	5.04077	1	32	89.5238	89.4548
359	6	sp|P05164|PERM_HUMAN	VVLEGGIDPILR	iTRAQ8plex@N-term		1583.96	1	99	18	6.02803	1	27	67.5833	67.6387
360	6	sp|P05164|PERM_HUMAN	WLPAEYEDGFSLPYGWTPGVK	iTRAQ8plex@N-term; iTRAQ8plex(K)@21		3019.56	2	99	17	6.28259	1	35	81.3835	81.3629
361	6	sp|P05164|PERM_HUMAN	YGHTLIQPFMFR	iTRAQ8plex@N-term		1812.97	1	99	8	4.55787	1	7	64.6752	64.6651
362	7	sp|P18206|VINC_HUMAN	AIPDLTAPVAAVQAAVSNLVR	iTRAQ8plex@N-term		2379.38	1	99	13	5.66549	0.978248	25	90.4984	90.7793
363	7	sp|P18206|VINC_HUMAN	AIPDLTAPVAAVQAAVSNLVR	iTRAQ8plex@N-term; Deamidated(N)@18		2380.36	2	99	10	4.01254	0.0217523	7	91.9437	92.0501
364	7	sp|P18206|VINC_HUMAN	ALASQLQDSLK	iTRAQ8plex@N-term; iTRAQ8plex(K)@11		1781.05	2	99	10	4.47084	1	6	60.0161	59.8532
365	7	sp|P18206|VINC_HUMAN	CDRVDQLTAQLADLAAR	iTRAQ8plex@N-term; Methylthio(C)@1	missed R-V@3	2208.13	3	99	12	4.80995	1	7	74.2932	74.2635
366	7	sp|P18206|VINC_HUMAN	EILGTCK	iTRAQ8plex@N-term; Methylthio(C)@6; iTRAQ8plex(K)@7		1416.79	3	98.3	7	4.00522	1	5	56.805	56.8352
367	7	sp|P18206|VINC_HUMAN	ELLPVLISAMK	iTRAQ8plex@N-term; iTRAQ8plex(K)@11		1821.13	2	99	10	5.66702	1	22	78.7089	78.9634
368	7	sp|P18206|VINC_HUMAN	ELTPQVVSAAR	iTRAQ8plex@N-term		1473.85	1	99	11	4.04891	1	6	51.8988	51.9712
369	7	sp|P18206|VINC_HUMAN	GILSGTSDLLLTFDEAEVR	iTRAQ8plex@N-term		2339.25	1	99	17	5.68011	1	30	81.6867	81.7966
370	7	sp|P18206|VINC_HUMAN	GNDIIAAAK	iTRAQ8plex@N-term; iTRAQ8plex(K)@9		1479.89	2	99	12	3.91845	1	6	50.6669	50.6921
371	7	sp|P18206|VINC_HUMAN	IAELCDDPK	iTRAQ8plex@N-term; Methylthio(C)@5; iTRAQ8plex(K)@9		1656.87	3	99	13	4.50469	1	3	65.8868	65.8711
372	7	sp|P18206|VINC_HUMAN	KIDAAQNWLADPNGGPEGEEQIR	iTRAQ8plex@N-term; iTRAQ8plex(K)@1	missed K-I@1	3115.61	3	99	14	4.81915	0.496293	2	61.1033	61.1119
373	7	sp|P18206|VINC_HUMAN	KIDAAQNWLADPNGGPEGEEQIR	iTRAQ8plex@N-term; iTRAQ8plex(K)@1; Deamidated(N)@13	missed K-I@1	3116.6	4	99	15	4.82559	0.503707	7	61.5867	61.6842
374	7	sp|P18206|VINC_HUMAN	LANVMMGPYR	iTRAQ8plex@N-term		1454.77	1	99	10	4.17603	1	4	63.85	63.8378
375	7	sp|P18206|VINC_HUMAN	LVQAAQMLQSDPYSVPAR	iTRAQ8plex@N-term		2277.21	1	99	19	5.28269	0.945816	7	72.733	72.8354
376	7	sp|P18206|VINC_HUMAN	LVQAAQMLQSDPYSVPAR	iTRAQ8plex@N-term; Deamidated(Q)@9		2278.19	2	99	10	4.04076	0.0541842	1	72.8963	72.881
377	7	sp|P18206|VINC_HUMAN	MALLMAEMSR	iTRAQ8plex@N-term		1455.76	1	99	9	4.27298	1	7	74.4059	74.4429
378	7	sp|P18206|VINC_HUMAN	MLGQMTDQVADLR	iTRAQ8plex@N-term		1780.91	1	99	15	4.79346	1	17	67.5162	67.5248
379	7	sp|P18206|VINC_HUMAN	MQEAMTQEVSDVFSDTTTPIK	iTRAQ8plex@N-term; iTRAQ8plex(K)@21		2965.49	2	99	16	5.289	1	12	78.3592	78.2426
380	7	sp|P18206|VINC_HUMAN	MSAEINEIIR	iTRAQ8plex@N-term		1478.81	1	99	15	5.42114	1	25	65.783	65.884
381	7	sp|P18206|VINC_HUMAN	MTGLVDEAIDTK	iTRAQ8plex@N-term; iTRAQ8plex(K)@12		1900.04	2	99	10	4.54612	1	7	67.3786	67.4122
382	7	sp|P18206|VINC_HUMAN	NQGIEEALK	iTRAQ8plex@N-term; iTRAQ8plex(K)@9		1608.93	2	98.91	10	3.89724	1	1	52.3017	52.3319
383	7	sp|P18206|VINC_HUMAN	QILDEAGK	iTRAQ8plex@N-term; iTRAQ8plex(K)@8		1480.87	2	99	12	3.84646	1	2	50.8858	50.8654
384	7	sp|P18206|VINC_HUMAN	SLGEISALTSK	iTRAQ8plex@N-term; iTRAQ8plex(K)@11		1713.01	2	99	13	4.32556	1	12	62.0941	62.0585
385	7	sp|P18206|VINC_HUMAN	SLLDASEEAIKK	iTRAQ8plex@N-term; iTRAQ8plex(K)@11; iTRAQ8plex(K)@12	missed K-K@11	2215.32	4	99	10	4.26961	1	3	58.1285	58.2435
386	7	sp|P18206|VINC_HUMAN	STVEGIQASVK	iTRAQ8plex@N-term; iTRAQ8plex(K)@11		1726.01	2	99	14	4.4036	1	7	52.2766	52.3319
387	7	sp|P18206|VINC_HUMAN	TNISDEESEQATEMLVHNAQNLMQSVK	iTRAQ8plex@N-term; iTRAQ8plex(K)@27		3653.81	2	99	14	4.31668	1	5	78.2463	78.2119
388	7	sp|P18206|VINC_HUMAN	VDQLTAQLADLAAR	iTRAQ8plex@N-term		1788	1	99	15	5.2911	1	16	76.571	76.684
389	7	sp|P18206|VINC_HUMAN	VLQLTSWDEDAWASK	iTRAQ8plex@N-term; iTRAQ8plex(K)@15		2356.25	2	99	16	4.93276	0.224738	4	73.7592	73.8532
390	7	sp|P18206|VINC_HUMAN	VLQLTSWDEDAWASK	iTRAQ8plex@N-term; Deamidated(Q)@3; iTRAQ8plex(K)@15		2357.24	3	99	12	5.47054	0.775262	3	73.5613	73.6194
391	7	sp|P18206|VINC_HUMAN	WIDNPTVDDR	iTRAQ8plex@N-term		1533.77	1	99	11	4.2647	1	12	56.8864	56.8933
392	8	sp|P13796|PLSL_HUMAN	AACLPLPGYR	iTRAQ8plex@N-term; Methylthio(C)@3		1409.75	2	99	8	4.49578	1	4	64.9187	64.9088
393	8	sp|P13796|PLSL_HUMAN	AECMLQQAER	iTRAQ8plex@N-term; Methylthio(C)@3		1527.72	2	97.86	9	3.89708	1	4	58.3716	58.3329
394	8	sp|P13796|PLSL_HUMAN	ALENDPDCR	iTRAQ8plex@N-term; Methylthio(C)@8		1381.63	2	99	11	3.54045	1	2	49.1199	49.1061
395	8	sp|P13796|PLSL_HUMAN	AYYHLLEQVAPK	iTRAQ8plex@N-term; iTRAQ8plex(K)@12		2039.17	2	99	9	4.34163	1	7	62.5644	62.6449
396	8	sp|P13796|PLSL_HUMAN	EGESLEDLMK	iTRAQ8plex@N-term; iTRAQ8plex(K)@10		1757.93	2	99	10	4.74783	1	7	60.6602	60.7269
397	8	sp|P13796|PLSL_HUMAN	EITENLMATGDLDQDGR	iTRAQ8plex@N-term		2181.05	1	99	20	4.74784	0.850328	5	63.1769	63.2275
398	8	sp|P13796|PLSL_HUMAN	EITENLMATGDLDQDGR	iTRAQ8plex@N-term; Oxidation(M)@7		2197.05	2	99	15	3.99339	0.149672	5	57.5938	57.5547
399	8	sp|P13796|PLSL_HUMAN	FSLVGIGGQDLNEGNR	iTRAQ8plex@N-term		1979.04	1	99	15	4.96721	1	4	66.6267	66.6469
400	8	sp|P13796|PLSL_HUMAN	GDEEGVPAVVIDMSGLR	iTRAQ8plex@N-term		2047.06	1	99	17	4.78737	1	13	72.6929	72.6998
401	8	sp|P13796|PLSL_HUMAN	GSVSDEEMMELR	iTRAQ8plex@N-term		1685.79	1	99	16	4.48051	0.858169	10	56.6703	56.6755
402	8	sp|P13796|PLSL_HUMAN	GSVSDEEMMELR	iTRAQ8plex@N-term; Oxidation(M)@8		1701.79	2	99	15	3.69871	0.141831	3	50.4311	50.4044
403	8	sp|P13796|PLSL_HUMAN	HVIPMNPNTNDLFNAVGDGIVLCK	iTRAQ8plex@N-term; Methylthio(C)@23; iTRAQ8plex(K)@24		3234.68	3	99	15	4.59571	0.673024	11	76.6853	76.6472
404	8	sp|P13796|PLSL_HUMAN	HVIPMNPNTNDLFNAVGDGIVLCK	iTRAQ8plex@N-term; Deamidated(N)@10; Methylthio(C)@23; iTRAQ8plex(K)@24		3235.67	4	99	12	4.28219	0.326976	8	78.186	78.1537
405	8	sp|P13796|PLSL_HUMAN	IGLFADIELSR	iTRAQ8plex@N-term		1536.88	1	99	13	4.4865	1	42	77.5879	77.5749
406	8	sp|P13796|PLSL_HUMAN	IGNFSTDIK	iTRAQ8plex@N-term; iTRAQ8plex(K)@9		1601.92	2	99	12	4.6227	1	6	58.585	58.656
407	8	sp|P13796|PLSL_HUMAN	ISFDEFIK	iTRAQ8plex@N-term; iTRAQ8plex(K)@8		1605.92	2	98.9	12	5.63013	1	9	66.6757	66.7126
408	8	sp|P13796|PLSL_HUMAN	ISTSLPVLDLIDAIQPGSINYDLLK	iTRAQ8plex@N-term; iTRAQ8plex(K)@25		3305.89	2	99	16	4.73419	0.732985	23	94.2569	94.1306
409	8	sp|P13796|PLSL_HUMAN	ISTSLPVLDLIDAIQPGSINYDLLK	iTRAQ8plex@N-term; Deamidated(N)@20; iTRAQ8plex(K)@25		3306.88	3	99	12	4.29563	0.267015	1	94.2548	94.5747
410	8	sp|P13796|PLSL_HUMAN	LNLAFIANLFNR	iTRAQ8plex@N-term		1708.99	1	99	12	6.06467	0.992699	18	86.1979	86.0363
411	8	sp|P13796|PLSL_HUMAN	LNLAFIANLFNR	iTRAQ8plex@N-term; Deamidated(N)@11		1709.98	2	99	12	3.93125	0.00730137	3	85.7764	85.7667
412	8	sp|P13796|PLSL_HUMAN	LSPEELLLR	iTRAQ8plex@N-term		1372.82	1	99	11	4.73929	1	9	67.5583	67.5483
413	8	sp|P13796|PLSL_HUMAN	MINLSVPDTIDER	iTRAQ8plex@N-term		1805.95	1	99	14	4.98491	1	8	65.4923	65.5663
414	8	sp|P13796|PLSL_HUMAN	MVMTVFACLMGK	iTRAQ8plex@N-term; Methylthio(C)@8; iTRAQ8plex(K)@12		1984.03	3	99	11	4.03072	1	12	94.992	94.9355
415	8	sp|P13796|PLSL_HUMAN	NWMNSLGVNPR	iTRAQ8plex@N-term		1590.82	1	99	13	4.89974	1	13	60.9355	60.8332
416	8	sp|P13796|PLSL_HUMAN	TLTLALIWQLMR	iTRAQ8plex@N-term		1762.05	1	99	10	4.24112	1	3	90.4801	90.5593
417	8	sp|P13796|PLSL_HUMAN	VDTDGNGYISFNELNDLFK	iTRAQ8plex@N-term; Deamidated(N)@6; iTRAQ8plex(K)@19		2769.4	3	99	16	4.78377	1	31	80.1937	80.2491
418	8	sp|P13796|PLSL_HUMAN	VNDDIIVNWVNETLR	iTRAQ8plex@N-term		2103.13	1	99	24	5.88017	0.955587	19	81.7001	81.7966
419	8	sp|P13796|PLSL_HUMAN	VNDDIIVNWVNETLR	iTRAQ8plex@N-term; Deamidated(N)@8		2104.11	2	99	13	4.54742	0.0444134	22	71.9699	71.9835
420	8	sp|P13796|PLSL_HUMAN	VNHLYSDLSDALVIFQLYEK	iTRAQ8plex@N-term; iTRAQ8plex(K)@20		2974.63	2	99	14	4.34048	0.582624	6	85.262	85.2271
421	8	sp|P13796|PLSL_HUMAN	VNHLYSDLSDALVIFQLYEK	iTRAQ8plex@N-term; Deamidated(N)@2; iTRAQ8plex(K)@20		2975.61	3	99	10	4.19562	0.417376	1	86.8283	86.7575
422	8	sp|P13796|PLSL_HUMAN	VYALPEDLVEVNPK	iTRAQ8plex@N-term; iTRAQ8plex(K)@14		2193.25	2	99	18	5.89034	1	28	69.4477	69.5965
423	8	sp|P13796|PLSL_HUMAN	YAFVNWINK	iTRAQ8plex@N-term; iTRAQ8plex(K)@9		1762	2	99	13	5.00023	0.318029	7	68.0088	68.0141
424	8	sp|P13796|PLSL_HUMAN	YAFVNWINK	iTRAQ8plex@N-term; Deamidated(N)@8; iTRAQ8plex(K)@9		1762.99	3	99	10	5.33153	0.681971	2	67.7967	67.827
425	8	sp|P13796|PLSL_HUMAN	YTLNILEEIGGGQK	iTRAQ8plex@N-term; iTRAQ8plex(K)@14		2142.21	2	99	16	4.79255	1	18	73.0562	73.106
426	9	sp|P06744|G6PI_HUMAN	AVLHVALR	iTRAQ8plex@N-term		1181.76	1	99	13	4.37619	1	6	51.6684	51.7263
427	9	sp|P06744|G6PI_HUMAN	DVMPEVNK	iTRAQ8plex@N-term; iTRAQ8plex(K)@8		1538.86	2	99	10	3.83001	1	6	50.9416	50.9668
428	9	sp|P06744|G6PI_HUMAN	EFGIDPQNMFEFWDWVGGR	iTRAQ8plex@N-term		2633.23	1	99	16	4.83027	1	6	91.2909	91.3907
429	9	sp|P06744|G6PI_HUMAN	EWFLQAAK	iTRAQ8plex@N-term; iTRAQ8plex(K)@8		1599.92	2	99	10	5.26235	1	9	62.5999	62.7697
430	9	sp|P06744|G6PI_HUMAN	FAAYFQQGDMESNGK	iTRAQ8plex@N-term; Deamidated(N)@13; iTRAQ8plex(K)@15		2301.12	3	99	15	5.02664	1	7	65.2954	65.2704
431	9	sp|P06744|G6PI_HUMAN	IFVQGIIWDINSFDQWGVELGK	iTRAQ8plex@N-term; iTRAQ8plex(K)@22		3171.72	2	99	10	3.9689	1	2	97.1628	97.1405
432	9	sp|P06744|G6PI_HUMAN	ILLANFLAQTEALMR	iTRAQ8plex@N-term		2007.15	1	99	19	5.97863	0.832833	23	90.2179	90.2943
433	9	sp|P06744|G6PI_HUMAN	ILLANFLAQTEALMR	iTRAQ8plex@N-term; Deamidated(N)@5		2008.13	2	99	16	4.95886	0.0795756	12	85.9628	86.0811
434	9	sp|P06744|G6PI_HUMAN	ILLANFLAQTEALMR	iTRAQ8plex@N-term; Oxidation(M)@14		2023.14	2	99	16	5.00054	0.0875917	6	82.0377	82.0662
435	9	sp|P06744|G6PI_HUMAN	LFDANK	iTRAQ8plex@N-term; iTRAQ8plex(K)@6		1314.78	2	98.95	7	3.83283	1	6	52.5857	52.6682
436	9	sp|P06744|G6PI_HUMAN	LTPFMLGALVAMYEHK	iTRAQ8plex@N-term; iTRAQ8plex(K)@16		2428.35	2	99	13	4.8486	1	6	84.3321	84.3125
437	9	sp|P06744|G6PI_HUMAN	MIPCDFLIPVQTQHPIR	iTRAQ8plex@N-term; Methylthio(C)@4		2357.24	2	99	20	5.79911	0.90881	29	75.4214	75.4763
438	9	sp|P06744|G6PI_HUMAN	MIPCDFLIPVQTQHPIR	iTRAQ8plex@N-term; Oxidation(M)@1; Methylthio(C)@4		2373.23	3	99	13	4.80059	0.0911901	8	71.0097	71.0432
439	9	sp|P06744|G6PI_HUMAN	MIPCDFLIPVQTQHPIRK	iTRAQ8plex@N-term; Methylthio(C)@4; iTRAQ8plex(K)@18	missed R-K@17	2789.54	4	99	10	4.88567	1	3	70.0052	69.8964
440	9	sp|P06744|G6PI_HUMAN	MLVDLAK	iTRAQ8plex@N-term; iTRAQ8plex(K)@7		1396.86	2	99	9	4.59091	1	6	60.7979	60.9238
441	9	sp|P06744|G6PI_HUMAN	NLVTEDVMR	iTRAQ8plex@N-term		1379.74	1	99	10	4.20599	1	12	55.2746	55.2174
442	9	sp|P06744|G6PI_HUMAN	SELNLR	iTRAQ8plex@N-term		1034.6	1	97.82	10	3.57921	1	1	46.3767	46.3365
443	9	sp|P06744|G6PI_HUMAN	TFTTQETITNAETAK	iTRAQ8plex@N-term; iTRAQ8plex(K)@15		2263.22	2	99	15	4.75821	1	7	54.8071	54.8156
444	9	sp|P06744|G6PI_HUMAN	TITDVINIGIGGSDLGPLMVTEALKPYSSGGPR	iTRAQ8plex@N-term; iTRAQ8plex(K)@25		3936.15	2	99	14	5.26826	0.851319	11	84.6658	84.4471
445	9	sp|P06744|G6PI_HUMAN	TITDVINIGIGGSDLGPLMVTEALKPYSSGGPR	iTRAQ8plex@N-term; Deamidated(N)@7; iTRAQ8plex(K)@25		3937.13	3	99	12	4.51042	0.148681	1	84.5218	84.4922
446	9	sp|P06744|G6PI_HUMAN	TLAQLNPESSLFIIASK	iTRAQ8plex@N-term; iTRAQ8plex(K)@17		2439.42	2	99	20	4.9512	1	24	76.6339	76.684
447	9	sp|P06744|G6PI_HUMAN	VDHQTGPIVWGEPGTNGQHAFYQLIHQGTK	iTRAQ8plex@N-term; Deamidated(N)@16; iTRAQ8plex(K)@30		3924.02	3	99	15	4.65992	1	2	65.6697	65.6315
448	9	sp|P06744|G6PI_HUMAN	VKEFGIDPQNMFEFWDWVGGR	iTRAQ8plex@N-term; iTRAQ8plex(K)@2	missed K-E@2	3164.6	3	99	11	4.6516	1	8	86.7001	86.6604
449	9	sp|P06744|G6PI_HUMAN	VWYVSNIDGTHIAK	iTRAQ8plex@N-term; iTRAQ8plex(K)@14		2210.23	2	99	12	4.41159	1	4	61.1661	61.1929
450	10	sp|P14618|KPYM_HUMAN	AEGSDVANAVLDGADCIMLSGETAK	iTRAQ8plex@N-term; Methylthio(C)@16; iTRAQ8plex(K)@25		3090.51	3	99	12	5.48013	0.946456	10	81.2397	81.1271
451	10	sp|P14618|KPYM_HUMAN	AEGSDVANAVLDGADCIMLSGETAK	iTRAQ8plex@N-term; Deamidated(N)@8; Methylthio(C)@16; iTRAQ8plex(K)@25		3091.5	4	99	18	4.23274	0.0535445	1	81.0769	81.1271
452	10	sp|P14618|KPYM_HUMAN	AGKPVICATQMLESMIK	iTRAQ8plex@N-term; iTRAQ8plex(K)@3; Methylthio(C)@7; iTRAQ8plex(K)@17		2777.54	4	99	10	5.31313	1	9	78.9888	79.0157
453	10	sp|P14618|KPYM_HUMAN	CDENILWLDYK	iTRAQ8plex@N-term; Methylthio(C)@1; iTRAQ8plex(K)@11		2065.05	3	99	12	5.07523	1	16	71.4403	71.4922
454	10	sp|P14618|KPYM_HUMAN	DPVQEAWAEDVDLR	iTRAQ8plex@N-term		1945.97	1	99	15	4.36084	1	5	66.4599	66.4667
455	10	sp|P14618|KPYM_HUMAN	EAEAAIYHLQLFEELR	iTRAQ8plex@N-term		2235.18	1	99	16	4.69707	1	5	74.5959	74.6145
456	10	sp|P14618|KPYM_HUMAN	FDEILEASDGIMVAR	iTRAQ8plex@N-term		1969.01	1	99	11	6.34551	1	1	78.4045	77.9438
457	10	sp|P14618|KPYM_HUMAN	FGVEQDVDMVFASFIR	iTRAQ8plex@N-term		2163.1	1	99	15	4.63391	0.934378	14	90.0485	90.0704
458	10	sp|P14618|KPYM_HUMAN	FGVEQDVDMVFASFIR	iTRAQ8plex@N-term; Deamidated(Q)@5		2164.08	2	97.72	8	3.48044	0.0656218	1	91.1167	91.1436
459	10	sp|P14618|KPYM_HUMAN	GADFLVTEVENGGSLGSK	iTRAQ8plex@N-term; iTRAQ8plex(K)@18		2387.28	2	99	11	4.90475	0.19172	2	69.1528	69.2268
460	10	sp|P14618|KPYM_HUMAN	GADFLVTEVENGGSLGSK	iTRAQ8plex@N-term; Deamidated(N)@11; iTRAQ8plex(K)@18		2388.26	3	99	19	5.52965	0.80828	37	65.4684	65.5209
461	10	sp|P14618|KPYM_HUMAN	GDLGIEIPAEK	iTRAQ8plex@N-term; iTRAQ8plex(K)@11		1749.01	2	97.78	11	4.73888	1	2	59.2833	59.2618
462	10	sp|P14618|KPYM_HUMAN	GIFPVLCK	iTRAQ8plex@N-term; Methylthio(C)@7; iTRAQ8plex(K)@8		1529.89	3	99	9	4.1825	1	3	69.9362	69.9248
463	10	sp|P14618|KPYM_HUMAN	GIFPVLCKDPVQEAWAEDVDLR	iTRAQ8plex@N-term; Methylthio(C)@7; iTRAQ8plex(K)@8	missed K-D@8	3153.65	4	99	14	4.62866	0.708005	6	78.6792	78.7289
464	10	sp|P14618|KPYM_HUMAN	GIFPVLCKDPVQEAWAEDVDLR	iTRAQ8plex@N-term; Methylthio(C)@7; iTRAQ8plex(K)@8; Deamidated(Q)@12	missed K-D@8	3154.63	5	99	12	4.244	0.291995	1	79.3563	79.3616
465	10	sp|P14618|KPYM_HUMAN	GSGTAEVELK	iTRAQ8plex@N-term; iTRAQ8plex(K)@10		1597.91	2	99	15	4.69425	1	13	47.5745	47.5797
466	10	sp|P14618|KPYM_HUMAN	GSGTAEVELKK	iTRAQ8plex@N-term; iTRAQ8plex(K)@10; iTRAQ8plex(K)@11	missed K-K@10	2030.21	4	99	15	4.15241	1	6	47.1079	47.1597
467	10	sp|P14618|KPYM_HUMAN	IYVDDGLISLQVK	iTRAQ8plex@N-term; iTRAQ8plex(K)@13		2070.22	2	99	16	5.31378	1	13	70.4274	70.406
468	10	sp|P14618|KPYM_HUMAN	LAPITSDPTEATAVGAVEASFK	iTRAQ8plex@N-term; iTRAQ8plex(K)@22		2782.52	2	99	14	4.78006	1	7	71.8866	71.8968
469	10	sp|P14618|KPYM_HUMAN	LDIDSPPITAR	iTRAQ8plex@N-term		1500.85	1	99	12	4.22855	1	17	57.8034	57.6996
470	10	sp|P14618|KPYM_HUMAN	RFDEILEASDGIMVAR	iTRAQ8plex@N-term	missed R-F@1	2125.11	2	99	15	4.92416	1	18	69.0987	69.1173
471	10	sp|P14618|KPYM_HUMAN	TATESFASDPILYRPVAVALDTK	iTRAQ8plex@N-term; iTRAQ8plex(K)@23		3072.7	2	99	11	4.65529	1	3	69.2514	69.265
472	10	sp|P14618|KPYM_HUMAN	VNFAMNVGK	iTRAQ8plex@N-term; iTRAQ8plex(K)@9		1586.91	2	99	12	5.10061	1	6	57.8495	57.829
473	11	sp|P00558|PGK1_HUMAN	ACANPAAGSVILLENLR	iTRAQ8plex@N-term; Methylthio(C)@2		2061.1	2	99	23	5.68448	0.648588	24	77.3302	77.1291
474	11	sp|P00558|PGK1_HUMAN	ACANPAAGSVILLENLR	iTRAQ8plex@N-term; Methylthio(C)@2; Deamidated(N)@4		2062.09	3	99	15	5.41833	0.351412	5	75.0492	75.2518
475	11	sp|P00558|PGK1_HUMAN	AGGFLMK	iTRAQ8plex@N-term; iTRAQ8plex(K)@7		1330.79	2	99	8	4.38466	1	5	55.9561	55.9439
476	11	sp|P00558|PGK1_HUMAN	ALESPERPFLAILGGAK	iTRAQ8plex@N-term; iTRAQ8plex(K)@17		2376.4	2	99	13	5.6859	1	30	69.3125	69.1906
477	11	sp|P00558|PGK1_HUMAN	ALMDEVVK	iTRAQ8plex@N-term; iTRAQ8plex(K)@8		1511.88	2	97.46	8	4.59751	1	8	57.1201	57.243
478	11	sp|P00558|PGK1_HUMAN	DCVGPEVEK	iTRAQ8plex@N-term; Methylthio(C)@2; iTRAQ8plex(K)@9		1628.84	3	99	11	4.09205	1	8	51.4798	51.4582
479	11	sp|P00558|PGK1_HUMAN	DVLFLK	iTRAQ8plex@N-term; iTRAQ8plex(K)@6		1341.85	2	98.9	7	4.58085	1	8	60.8714	60.9988
480	11	sp|P00558|PGK1_HUMAN	FCLDNGAK	iTRAQ8plex@N-term; Methylthio(C)@2; Deamidated(N)@5; iTRAQ8plex(K)@8		1521.78	4	99	11	4.36065	1	6	58.3811	58.3643
481	11	sp|P00558|PGK1_HUMAN	FHVEEEGK	iTRAQ8plex@N-term; iTRAQ8plex(K)@8		1581.86	2	98.98	12	3.60552	1	3	46.1517	46.1117
482	11	sp|P00558|PGK1_HUMAN	GCITIIGGGDTATCCAK	iTRAQ8plex@N-term; Methylthio(C)@2; Methylthio(C)@14; Methylthio(C)@15; iTRAQ8plex(K)@17		2329.09	5	99	14	4.69704	1	7	71.744	71.8499
483	11	sp|P00558|PGK1_HUMAN	ITLPVDFVTADK	iTRAQ8plex@N-term; iTRAQ8plex(K)@12		1926.13	2	99	11	4.79601	1	2	71.0161	71.0381
484	11	sp|P00558|PGK1_HUMAN	ITLPVDFVTADKFDENAK	iTRAQ8plex@N-term; iTRAQ8plex(K)@12; iTRAQ8plex(K)@18	missed K-F@12	2934.65	4	99	12	5.1853	0.540924	8	69.0031	68.965
485	11	sp|P00558|PGK1_HUMAN	ITLPVDFVTADKFDENAK	iTRAQ8plex@N-term; iTRAQ8plex(K)@12; Deamidated(N)@16; iTRAQ8plex(K)@18	missed K-F@12	2935.63	5	99	14	5.11405	0.459076	4	69.712	69.6417
486	11	sp|P00558|PGK1_HUMAN	LGDVYVNDAFGTAHR	iTRAQ8plex@N-term		1937.99	1	99	16	4.92465	1	11	61.0172	60.9838
487	11	sp|P00558|PGK1_HUMAN	QIVWNGPVGVFEWEAFAR	iTRAQ8plex@N-term		2408.26	1	99	18	4.53102	0.151085	7	82.376	82.3812
488	11	sp|P00558|PGK1_HUMAN	QIVWNGPVGVFEWEAFAR	iTRAQ8plex@N-term; Deamidated(N)@5		2409.24	2	99	21	5.28066	0.848915	22	82.8144	82.9227
489	11	sp|P00558|PGK1_HUMAN	TGQATVASGIPAGWMGLDCGPESSK	iTRAQ8plex@N-term; Methylthio(C)@19; iTRAQ8plex(K)@25		3073.51	3	99	21	4.80844	1	9	72.1094	72.1163
490	11	sp|P00558|PGK1_HUMAN	VLNNMEIGTSLFDEEGAK	iTRAQ8plex@N-term; iTRAQ8plex(K)@18		2574.35	2	99	18	5.49213	0.823143	18	72.9613	73.0165
491	11	sp|P00558|PGK1_HUMAN	VLNNMEIGTSLFDEEGAK	iTRAQ8plex@N-term; Deamidated(N)@3; iTRAQ8plex(K)@18		2575.33	3	99	16	4.82428	0.176857	16	71.6183	71.714
492	11	sp|P00558|PGK1_HUMAN	VLPGVDALSNI	iTRAQ8plex@N-term		1400.82	1	99	9	5.36885	1	8	75.3615	75.4763
493	11	sp|P00558|PGK1_HUMAN	VSHVSTGGGASLELLEGK	iTRAQ8plex@N-term; iTRAQ8plex(K)@18		2348.32	2	99	12	4.54158	1	4	57.869	57.837
494	11	sp|P00558|PGK1_HUMAN	YSLEPVAVELK	iTRAQ8plex@N-term; iTRAQ8plex(K)@11		1855.09	2	99	8	4.45903	1	7	62.7971	62.7851
495	12	sp|P14780|MMP9_HUMAN	ADSTVMGGNSAGELCVFPFTFLGK	iTRAQ8plex@N-term; Methylthio(C)@15; iTRAQ8plex(K)@24		3101.55	3	99	21	5.95926	0.737812	13	87.7111	87.7264
496	12	sp|P14780|MMP9_HUMAN	ADSTVMGGNSAGELCVFPFTFLGK	iTRAQ8plex@N-term; Deamidated(N)@9; Methylthio(C)@15; iTRAQ8plex(K)@24		3102.53	4	99	19	5.46681	0.237407	14	89.0859	89.1475
497	12	sp|P14780|MMP9_HUMAN	ADSTVMGGNSAGELCVFPFTFLGK	iTRAQ8plex@N-term; Oxidation(M)@6; Methylthio(C)@15; iTRAQ8plex(K)@24		3117.54	4	99	15	4.48542	0.0247803	4	85.7615	85.7218
498	12	sp|P14780|MMP9_HUMAN	AFALWSAVTPLTFTR	iTRAQ8plex@N-term		1984.11	1	99	12	5.21993	1	16	84.1694	84.1332
499	12	sp|P14780|MMP9_HUMAN	AVIDDAFAR	iTRAQ8plex@N-term		1280.7	1	99	13	5.02569	1	12	56.593	56.5107
500	12	sp|P14780|MMP9_HUMAN	DGLLAHAFPPGPGIQGDAHFDDDELWSLGK	iTRAQ8plex@N-term; iTRAQ8plex(K)@30		3782.92	2	99	12	4.37515	1	3	72.2414	72.2467
501	12	sp|P14780|MMP9_HUMAN	FGFCPSER	iTRAQ8plex@N-term; Methylthio(C)@4		1291.6	2	99	7	4.47295	1	5	61.0766	61.2021
502	12	sp|P14780|MMP9_HUMAN	FGNADGAACHFPFIFEGR	iTRAQ8plex@N-term; Methylthio(C)@9		2305.07	2	99	17	5.23923	0.683706	23	76.181	76.1537
503	12	sp|P14780|MMP9_HUMAN	FGNADGAACHFPFIFEGR	iTRAQ8plex@N-term; Deamidated(N)@3; Methylthio(C)@9		2306.06	3	99	16	4.90446	0.316294	11	78.5413	78.6472
504	12	sp|P14780|MMP9_HUMAN	FQTFEGDLK	iTRAQ8plex@N-term; iTRAQ8plex(K)@9		1691.93	2	99	13	5.39995	1	14	61.6204	61.6087
505	12	sp|P14780|MMP9_HUMAN	GSRPQGPFLIADKWPALPR	iTRAQ8plex@N-term; iTRAQ8plex(K)@13	missed K-W@13	2713.56	3	97.51	12	4.98329	1	8	64.6982	64.8444
506	12	sp|P14780|MMP9_HUMAN	LFFFSGR	iTRAQ8plex@N-term		1176.66	1	99	9	4.96267	1	3	69.6165	69.5965
507	12	sp|P14780|MMP9_HUMAN	LFGFCPTR	iTRAQ8plex@N-term; Methylthio(C)@5		1289.66	2	99	9	4.92747	1	11	72.0851	72.122
508	12	sp|P14780|MMP9_HUMAN	LWCATTSNFDSDK	iTRAQ8plex@N-term; Methylthio(C)@3; iTRAQ8plex(K)@13		2141.04	3	99	10	4.28637	1	1	67.667	67.5483
509	12	sp|P14780|MMP9_HUMAN	LYTQDGNADGKPCQFPFIFQGQSYSACTTDGR	iTRAQ8plex@N-term; iTRAQ8plex(K)@11; Methylthio(C)@13; Methylthio(C)@27		4214.94	4	99	15	4.32143	1	2	76.4566	76.3738
510	12	sp|P14780|MMP9_HUMAN	MFPGVPLDTHDVFQYR	iTRAQ8plex@N-term		2225.12	1	99	18	5.67981	1	14	68.908	68.9199
511	12	sp|P14780|MMP9_HUMAN	QLAEEYLYR	iTRAQ8plex@N-term		1487.79	1	99	15	5.2148	1	4	58.0915	58.0561
512	12	sp|P14780|MMP9_HUMAN	QLSLPETGELDSATLK	iTRAQ8plex@N-term; iTRAQ8plex(K)@16		2309.29	2	99	16	4.81714	1	4	62.7329	62.7851
513	12	sp|P14780|MMP9_HUMAN	QSTLVLFPGDLR	iTRAQ8plex@N-term		1648.95	1	99	13	4.45317	1	4	65.9367	65.947
514	12	sp|P14780|MMP9_HUMAN	QVWVYTGASVLGPR	iTRAQ8plex@N-term		1836.02	1	99	13	4.70771	1	7	66.6287	66.654
515	12	sp|P14780|MMP9_HUMAN	SDGLPWCSTTANYDTDDR	iTRAQ8plex@N-term; Methylthio(C)@7		2366.01	2	99	18	4.84018	1	4	66.4681	66.3974
516	12	sp|P14780|MMP9_HUMAN	SLGPALLLLQK	iTRAQ8plex@N-term; iTRAQ8plex(K)@11		1760.14	2	99	13	5.47087	1	10	72.3576	72.6998
517	13	sp|P04406|G3P_HUMAN	AAFNSGK	iTRAQ8plex@N-term; Deamidated(N)@4; iTRAQ8plex(K)@7		1302.74	3	99	10	3.58816	1	5	43.7834	43.8086
518	13	sp|P04406|G3P_HUMAN	AENGKLVINGNPITIFQER	iTRAQ8plex@N-term; iTRAQ8plex(K)@5; Deamidated(N)@11	missed K-L@5	2721.53	4	99	13	5.22947	1	5	66.3237	66.3974
519	13	sp|P04406|G3P_HUMAN	AGAHLQGGAK	iTRAQ8plex@N-term; iTRAQ8plex(K)@10		1516.89	2	99	16	3.96806	1	5	38.6954	38.707
520	13	sp|P04406|G3P_HUMAN	GALQNIIPASTGAAK	iTRAQ8plex@N-term; iTRAQ8plex(K)@15		2019.19	2	99	16	4.40043	1	50	59.5975	59.6921
521	13	sp|P04406|G3P_HUMAN	IISNASCTTNCLAPLAK	iTRAQ8plex@N-term; Methylthio(C)@7; Methylthio(C)@11; iTRAQ8plex(K)@17		2419.26	4	99	11	4.52197	0.459663	7	72.2808	72.2467
522	13	sp|P04406|G3P_HUMAN	IISNASCTTNCLAPLAK	iTRAQ8plex@N-term; Methylthio(C)@7; Deamidated(N)@10; Methylthio(C)@11; iTRAQ8plex(K)@17		2420.24	5	99	14	4.5922	0.540337	17	71.5994	71.5669
523	13	sp|P04406|G3P_HUMAN	LISWYDNEFGYSNR	iTRAQ8plex@N-term		2067	1	99	19	6.16923	0.956646	24	78.1257	78.1542
524	13	sp|P04406|G3P_HUMAN	LISWYDNEFGYSNR	iTRAQ8plex@N-term; Deamidated(N)@13		2067.98	2	99	14	4.82551	0.0433542	31	79.4232	79.3171
525	13	sp|P04406|G3P_HUMAN	LTGMAFR	iTRAQ8plex@N-term		1098.62	1	99	11	5.1135	1	3	56.9327	56.9968
526	13	sp|P04406|G3P_HUMAN	LVINGNPITIFQER	iTRAQ8plex@N-term		1917.1	1	99	11	4.47716	0.0608188	4	72.6928	72.7146
527	13	sp|P04406|G3P_HUMAN	LVINGNPITIFQER	iTRAQ8plex@N-term; Deamidated(N)@4		1918.08	2	99	17	5.66588	0.939181	31	75.0264	74.8792
528	13	sp|P04406|G3P_HUMAN	LVINGNPITIFQERDPSK	iTRAQ8plex@N-term; Deamidated(N)@4; iTRAQ8plex(K)@18	missed R-D@14	2649.5	4	99	11	5.01665	1	14	67.5395	67.7362
529	13	sp|P04406|G3P_HUMAN	QASEGPLK	iTRAQ8plex@N-term; iTRAQ8plex(K)@8		1436.84	2	99	14	4.12297	1	6	42.7696	42.8363
530	13	sp|P04406|G3P_HUMAN	RVIISAPSADAPMFVMGVNHEK	iTRAQ8plex@N-term; iTRAQ8plex(K)@22	missed R-V@1	2976.61	3	97.53	12	4.5154	1	7	61.2779	61.2438
531	13	sp|P04406|G3P_HUMAN	TVDGPSGK	iTRAQ8plex@N-term; iTRAQ8plex(K)@8		1367.79	2	99	12	4.22008	1	6	39.5909	39.6396
532	13	sp|P04406|G3P_HUMAN	VGVNGFGR	iTRAQ8plex@N-term; Deamidated(N)@4		1109.61	2	99	12	4.26665	1	12	49.141	49.2085
533	13	sp|P04406|G3P_HUMAN	VIHDNFGIVEGLMTTVHAITATQK	iTRAQ8plex@N-term; iTRAQ8plex(K)@24		3202.76	2	99	17	5.22875	0.677293	27	82.2487	82.254
534	13	sp|P04406|G3P_HUMAN	VIHDNFGIVEGLMTTVHAITATQK	iTRAQ8plex@N-term; Deamidated(N)@5; iTRAQ8plex(K)@24		3203.75	3	99	15	4.81651	0.262144	12	82.0477	81.9313
535	13	sp|P04406|G3P_HUMAN	VIHDNFGIVEGLMTTVHAITATQK	iTRAQ8plex@N-term; Oxidation(M)@13; iTRAQ8plex(K)@24		3218.76	3	99	13	4.18018	0.0605634	9	72.6946	72.6571
536	13	sp|P04406|G3P_HUMAN	VIISAPSADAPMFVMGVNHEK	iTRAQ8plex@N-term; iTRAQ8plex(K)@21		2820.51	2	99	20	5.70571	0.742652	12	67.0913	67.0534
537	13	sp|P04406|G3P_HUMAN	VIISAPSADAPMFVMGVNHEK	iTRAQ8plex@N-term; Deamidated(N)@18; iTRAQ8plex(K)@21		2821.5	3	99	16	5.1119	0.189225	10	67.2817	67.3337
538	13	sp|P04406|G3P_HUMAN	VIISAPSADAPMFVMGVNHEK	iTRAQ8plex@N-term; Oxidation(M)@15; iTRAQ8plex(K)@21		2836.51	3	99	13	4.66822	0.068123	11	62.7604	62.7657
539	13	sp|P04406|G3P_HUMAN	VIPELNGK	iTRAQ8plex@N-term; Deamidated(N)@6; iTRAQ8plex(K)@8		1477.9	3	97.66	10	5.03134	1	21	57.0123	56.8596
540	13	sp|P04406|G3P_HUMAN	VPTANVSVVDLTCR	iTRAQ8plex@N-term; Methylthio(C)@13		1822.96	2	99	16	5.86878	1	21	66.8089	66.9179
541	13	sp|P04406|G3P_HUMAN	VVDLMAHMASK	iTRAQ8plex@N-term; iTRAQ8plex(K)@11		1809.01	2	99	15	5.62556	0.986909	39	67.6974	67.5483
542	13	sp|P04406|G3P_HUMAN	VVDLMAHMASK	iTRAQ8plex@N-term; Oxidation(M)@5; iTRAQ8plex(K)@11		1825.01	3	97.89	10	3.74827	0.0130913	5	54.2758	54.3318
543	13	sp|P04406|G3P_HUMAN	VVDLMAHMASKE	iTRAQ8plex@N-term; iTRAQ8plex(K)@11	missed K-E@11	1938.05	3	99	16	5.60582	1	41	68.6803	68.7601
544	13	sp|P04406|G3P_HUMAN	WGDAGAEYVVESTGVFTTMEK	iTRAQ8plex@N-term; iTRAQ8plex(K)@21		2884.44	2	99	21	5.91574	0.958484	47	76.0087	76.1072
545	13	sp|P04406|G3P_HUMAN	WGDAGAEYVVESTGVFTTMEK	iTRAQ8plex@N-term; Oxidation(M)@19; iTRAQ8plex(K)@21		2900.44	3	99	18	4.55238	0.0415161	2	72.1504	72.1128
546	14	sp|P08514|ITA2B_HUMAN	AEAQVELR	iTRAQ8plex@N-term		1218.69	1	99	14	4.41972	1	19	45.9185	46.0263
547	14	sp|P08514|ITA2B_HUMAN	AEGGQCPSLLFDLR	iTRAQ8plex@N-term; Methylthio(C)@6		1854.93	2	99	15	5.34767	1	11	74.2306	74.1701
548	14	sp|P08514|ITA2B_HUMAN	ALSNVEGFER	iTRAQ8plex@N-term		1424.76	1	99	11	4.09548	1	16	57.2592	57.2479
549	14	sp|P08514|ITA2B_HUMAN	ASVQLLVQDSLNPAVK	iTRAQ8plex@N-term; iTRAQ8plex(K)@16		2289.35	2	99	16	4.73636	1	7	67.7352	67.7505
550	14	sp|P08514|ITA2B_HUMAN	DGYNDIAVAAPYGGPSGR	iTRAQ8plex@N-term		2083.03	1	98.7	10	3.87286	1	1	56.3112	56.2757
551	14	sp|P08514|ITA2B_HUMAN	FGSAIAPLGDLDR	iTRAQ8plex@N-term		1634.89	1	99	14	4.81513	1	1	66.9067	66.8951
552	14	sp|P08514|ITA2B_HUMAN	FGSAIAPLGDLDRDGYNDIAVAAPYGGPSGR	iTRAQ8plex@N-term	missed R-D@13	3395.71	2	99	14	4.83847	1	1	71.6097	71.6199
553	14	sp|P08514|ITA2B_HUMAN	GEAQVWTQLLR	iTRAQ8plex@N-term		1603.9	1	99	13	5.07414	1	10	67.6574	67.7362
554	14	sp|P08514|ITA2B_HUMAN	GPHALGAPSLLLTGTQLYGR	iTRAQ8plex@N-term		2325.31	1	99	18	4.68576	1	8	66.0072	66.0208
555	14	sp|P08514|ITA2B_HUMAN	GQVLVFLGQSEGLR	iTRAQ8plex@N-term		1806.03	1	99	14	5.01027	1	14	71.6872	71.5787
556	14	sp|P08514|ITA2B_HUMAN	HDLLVGAPLYMESR	iTRAQ8plex@N-term		1904.01	1	99	11	4.57313	1	5	61.1613	61.2257
557	14	sp|P08514|ITA2B_HUMAN	IVLLDVPVR	iTRAQ8plex@N-term		1326.85	1	99	8	4.75022	1	3	67.9772	67.9237
558	14	sp|P08514|ITA2B_HUMAN	IYVENDFSWDK	iTRAQ8plex@N-term; iTRAQ8plex(K)@11		2023.05	2	99	12	4.38721	1	8	65.6882	65.6934
559	14	sp|P08514|ITA2B_HUMAN	LSLNAELQLDR	iTRAQ8plex@N-term		1574.89	1	98.42	12	4.6375	1	7	63.1956	63.2275
560	14	sp|P08514|ITA2B_HUMAN	SRPSQVLDSPFPTGSAFGFSLR	iTRAQ8plex@N-term		2656.39	1	99	16	5.31036	0.69001	9	69.1854	69.236
561	14	sp|P08514|ITA2B_HUMAN	SRPSQVLDSPFPTGSAFGFSLR	iTRAQ8plex@N-term; Deamidated(Q)@5		2657.38	2	99	13	4.96286	0.30999	1	69.4925	69.6334
562	14	sp|P08514|ITA2B_HUMAN	TLGPSQEETGGVFLCPWR	iTRAQ8plex@N-term; Methylthio(C)@15		2326.14	2	99	17	5.44274	1	7	76.2334	76.0659
563	14	sp|P08514|ITA2B_HUMAN	VLLLGSQQAGTTLNLDLGGK	iTRAQ8plex@N-term; iTRAQ8plex(K)@20		2605.53	2	99	11	4.75922	1	9	72.8991	72.9243
564	14	sp|P08514|ITA2B_HUMAN	VVLCELGNPMK	iTRAQ8plex@N-term; Methylthio(C)@4; iTRAQ8plex(K)@11		1856.02	3	99	13	4.74616	0.751929	12	69.727	69.7776
565	14	sp|P08514|ITA2B_HUMAN	VVLCELGNPMK	iTRAQ8plex@N-term; Methylthio(C)@4; Deamidated(N)@8; iTRAQ8plex(K)@11		1857	4	99	7	4.26456	0.248071	1	70.1387	70.0855
566	14	sp|P08514|ITA2B_HUMAN	VYLFLQPR	iTRAQ8plex@N-term		1338.8	1	99	9	4.90041	1	8	70.9342	70.9077
567	15	sp|P46940|IQGA1_HUMAN	AQAHAENNEFITWNDIQACVDHVNLVVQEEHER	iTRAQ8plex@N-term; Methylthio(C)@19		4207.97	2	99	13	4.44108	1	1	80.2398	80.2087
568	15	sp|P46940|IQGA1_HUMAN	EEIQSSISGVTAAYNR	iTRAQ8plex@N-term		2028.04	1	99	13	4.19986	1	2	61.3234	61.3386
569	15	sp|P46940|IQGA1_HUMAN	EELQSGVDAANSAAQQYQR	iTRAQ8plex@N-term		2368.16	1	99	11	3.91073	1	1	57.7765	57.7834
570	15	sp|P46940|IQGA1_HUMAN	EQLWLANEGLITR	iTRAQ8plex@N-term		1846.03	1	99	11	4.25426	0.243366	3	67.7276	67.646
571	15	sp|P46940|IQGA1_HUMAN	EQLWLANEGLITR	iTRAQ8plex@N-term; Deamidated(N)@7		1847.01	2	99	8	4.74688	0.756634	1	68.3782	68.3606
572	15	sp|P46940|IQGA1_HUMAN	ERDVYEELLTQAEIQGNINK	iTRAQ8plex@N-term; iTRAQ8plex(K)@20	missed R-D@2	2969.59	3	98.85	11	4.69946	1	1	68.0286	67.9972
573	15	sp|P46940|IQGA1_HUMAN	FALGIFAINEAVESGDVGK	iTRAQ8plex@N-term; iTRAQ8plex(K)@19		2544.41	2	99	10	3.89553	1	3	84.2207	84.2343
574	15	sp|P46940|IQGA1_HUMAN	FQPGETLTEILETPATSEQEAEHQR	iTRAQ8plex@N-term		3144.55	1	99	20	4.69252	1	4	72.77	72.7449
575	15	sp|P46940|IQGA1_HUMAN	GVLLEIEDLQVNQFK	iTRAQ8plex@N-term; iTRAQ8plex(K)@15		2352.35	2	99	15	4.60066	1	2	76.6124	76.5809
576	15	sp|P46940|IQGA1_HUMAN	HTDNVIQWLNAMDEIGLPK	iTRAQ8plex@N-term; iTRAQ8plex(K)@19		2801.5	2	99	14	4.4687	1	9	78.18	78.1935
577	15	sp|P46940|IQGA1_HUMAN	LAAVALINAAIQK	iTRAQ8plex@N-term; iTRAQ8plex(K)@13		1903.21	2	99	13	4.50087	1	7	78.4845	78.6019
578	15	sp|P46940|IQGA1_HUMAN	LEGVLAEVAQHYQDTLIR	iTRAQ8plex@N-term		2358.28	1	99	15	4.86806	1	7	83.046	83.0314
579	15	sp|P46940|IQGA1_HUMAN	LGLAPQIQDLYGK	iTRAQ8plex@N-term; iTRAQ8plex(K)@13		2023.19	2	99	9	4.48223	1	1	68.2621	68.4194
580	15	sp|P46940|IQGA1_HUMAN	NPNAMLVNLEEPLASTYQDILYQAK	iTRAQ8plex@N-term; iTRAQ8plex(K)@25		3442.83	2	99	23	4.86867	0.647755	12	84.4402	84.4922
581	15	sp|P46940|IQGA1_HUMAN	NPNAMLVNLEEPLASTYQDILYQAK	iTRAQ8plex@N-term; Deamidated(N)@3; iTRAQ8plex(K)@25		3443.81	3	99	11	4.60411	0.352245	5	84.0296	84.0432
582	15	sp|P46940|IQGA1_HUMAN	QLSSSVTGLTNIEEENCQR	iTRAQ8plex@N-term; Methylthio(C)@17		2457.18	2	99	16	4.48187	1	1	65.6047	65.657
583	15	sp|P46940|IQGA1_HUMAN	TVLELMNPEAQLPQVYPFAADLYQK	iTRAQ8plex@N-term; iTRAQ8plex(K)@25		3485.87	2	99	13	5.30864	1	4	84.0027	84.0598
584	15	sp|P46940|IQGA1_HUMAN	VNTFSALANIDLALEQGDALALFR	iTRAQ8plex@N-term		2865.55	1	99	26	4.93415	0.912228	28	94.8803	94.9806
585	15	sp|P46940|IQGA1_HUMAN	VNTFSALANIDLALEQGDALALFR	iTRAQ8plex@N-term; Deamidated(N)@2		2866.54	2	99	21	3.9174	0.0877716	2	96.2882	96.2667
586	15	sp|P46940|IQGA1_HUMAN	VNVNLLIFLLNK	iTRAQ8plex@N-term; iTRAQ8plex(K)@12		2007.27	2	99	9	4.34895	1	1	86.0685	85.9581
587	15	sp|P46940|IQGA1_HUMAN	WMEACLGEDLPPTTELEEGLR	iTRAQ8plex@N-term; Methylthio(C)@5		2738.29	2	99	14	4.56328	1	4	84.363	84.3749
588	16	sp|P06396|GELS_HUMAN	AGALNSNDAFVLK	iTRAQ8plex@N-term; iTRAQ8plex(K)@13		1927.1	2	99	10	4.46783	0.423438	12	61.0405	60.8934
589	16	sp|P06396|GELS_HUMAN	AGALNSNDAFVLK	iTRAQ8plex@N-term; Deamidated(N)@5; iTRAQ8plex(K)@13		1928.08	3	99	12	4.60189	0.576562	7	60.3721	60.4372
590	16	sp|P06396|GELS_HUMAN	AGKEPGLQIWR	iTRAQ8plex@N-term; iTRAQ8plex(K)@3	missed K-E@3	1862.1	3	98.94	10	4.60353	1	7	54.8646	54.8982
591	16	sp|P06396|GELS_HUMAN	AQPVQVAEGSEPDGFWEALGGK	iTRAQ8plex@N-term; iTRAQ8plex(K)@22		2879.49	2	99	14	4.50073	1	3	70.1702	70.1318
592	16	sp|P06396|GELS_HUMAN	DSQEEEKTEALTSAK	iTRAQ8plex@N-term; iTRAQ8plex(K)@7; iTRAQ8plex(K)@15	missed K-T@7	2577.39	4	99	14	4.03104	1	6	50.2198	50.2249
593	16	sp|P06396|GELS_HUMAN	EPGLQIWR	iTRAQ8plex@N-term		1301.74	1	99	10	4.51148	1	7	59.1356	59.1708
594	16	sp|P06396|GELS_HUMAN	EVQGFESATFLGYFK	iTRAQ8plex@N-term; iTRAQ8plex(K)@15		2330.24	2	99	17	5.07152	0.890836	14	76.0101	76.1098
595	16	sp|P06396|GELS_HUMAN	EVQGFESATFLGYFK	iTRAQ8plex@N-term; Deamidated(Q)@3; iTRAQ8plex(K)@15		2331.22	3	99	12	4.15981	0.109164	1	74.9018	74.7834
596	16	sp|P06396|GELS_HUMAN	FDLVPVPTNLYGDFFTGDAYVILK	iTRAQ8plex@N-term; iTRAQ8plex(K)@24		3311.79	2	99	10	4.58845	0.861141	5	90.734	90.7576
597	16	sp|P06396|GELS_HUMAN	FDLVPVPTNLYGDFFTGDAYVILK	iTRAQ8plex@N-term; Deamidated(N)@9; iTRAQ8plex(K)@24		3312.78	3	99	8	3.79595	0.138859	1	91.3454	91.4042
598	16	sp|P06396|GELS_HUMAN	GGVASGFK	iTRAQ8plex@N-term; iTRAQ8plex(K)@8		1329.79	2	99	12	3.75709	1	5	47.53	47.4899
599	16	sp|P06396|GELS_HUMAN	HVVPNEVVVQR	iTRAQ8plex@N-term		1578.91	1	99	14	3.97451	1	3	46.6462	46.6173
600	16	sp|P06396|GELS_HUMAN	NWRDPDQTDGLGLSYLSSHIANVER	iTRAQ8plex@N-term	missed R-D@3	3146.57	2	99	16	4.55366	1	2	65.5728	65.5864
601	16	sp|P06396|GELS_HUMAN	QGFEPPSFVGWFLGWDDDYWSVDPLDR	iTRAQ8plex@N-term		3533.65	1	99	17	4.03989	1	1	97.4902	97.4511
602	16	sp|P06396|GELS_HUMAN	QGQIIYNWQGAQSTQDEVAASAILTAQLDEELGGTPVQSR	iTRAQ8plex@N-term		4576.3	1	99	20	4.50177	1	1	82.5111	82.5162
603	16	sp|P06396|GELS_HUMAN	SEDCFILDHGK	iTRAQ8plex@N-term; Methylthio(C)@4; iTRAQ8plex(K)@11		1916.96	3	99	14	4.84094	1	10	58.9828	59.0114
604	16	sp|P06396|GELS_HUMAN	TGAQELLR	iTRAQ8plex@N-term		1190.69	1	99	11	3.75197	1	6	49.2489	49.2541
605	16	sp|P06396|GELS_HUMAN	TPSAAYLWVGTGASEAEK	iTRAQ8plex@N-term; iTRAQ8plex(K)@18		2445.3	2	99	16	5.2634	1	8	63.073	63.1249
606	16	sp|P06396|GELS_HUMAN	VSNGAGTMSVSLVADENPFAQGALK	iTRAQ8plex@N-term; Deamidated(N)@3; iTRAQ8plex(K)@25		3071.61	3	99	15	4.84151	1	5	71.7504	71.7173
607	16	sp|P06396|GELS_HUMAN	YIETDPANR	iTRAQ8plex@N-term		1381.71	1	99	13	3.67916	1	5	47.5534	47.5702
608	17	sp|P29401|TKT_HUMAN	AVELAANTK	iTRAQ8plex@N-term; iTRAQ8plex(K)@9		1523.91	2	99	13	4.32333	1	11	51.1395	51.2892
609	17	sp|P29401|TKT_HUMAN	DAIAQAVR	iTRAQ8plex@N-term		1146.67	1	99	11	3.81231	1	5	47.7175	47.7684
610	17	sp|P29401|TKT_HUMAN	HQPTAIIAK	iTRAQ8plex@N-term; iTRAQ8plex(K)@9		1585.98	2	99	12	3.64048	1	2	45.042	45.0473
611	17	sp|P29401|TKT_HUMAN	IIALDGDTK	iTRAQ8plex@N-term; iTRAQ8plex(K)@9		1552.93	2	99	14	4.60464	1	4	57.346	57.4169
612	17	sp|P29401|TKT_HUMAN	ILATPPQEDAPSVDIANIR	iTRAQ8plex@N-term		2323.27	1	99	20	4.85157	1	18	67.4978	67.5483
613	17	sp|P29401|TKT_HUMAN	ILTVEDHYYEGGIGEAVSSAVVGEPGITVTHLAVNR	iTRAQ8plex@N-term		4056.11	1	99	20	4.81176	1	6	74.4808	74.5329
614	17	sp|P29401|TKT_HUMAN	LDNLVAILDINR	iTRAQ8plex@N-term		1671.98	1	99	12	4.9361	1	15	82.051	82.2463
615	17	sp|P29401|TKT_HUMAN	LGQSDPAPLQHQMDIYQK	iTRAQ8plex@N-term; iTRAQ8plex(K)@18		2676.42	2	99	13	4.51542	1	9	58.1385	58.1064
616	17	sp|P29401|TKT_HUMAN	LILDSAR	iTRAQ8plex@N-term		1090.67	1	98.87	8	4.03214	1	5	53.7971	53.8578
617	17	sp|P29401|TKT_HUMAN	NMAEQIIQEIYSQIQSK	iTRAQ8plex@N-term; iTRAQ8plex(K)@17		2630.42	2	99	17	6.06885	0.819224	28	88.0216	88.2126
618	17	sp|P29401|TKT_HUMAN	NMAEQIIQEIYSQIQSK	iTRAQ8plex@N-term; Deamidated(N)@1; iTRAQ8plex(K)@17		2631.4	3	99	14	5.2431	0.122362	9	88.8507	88.9683
619	17	sp|P29401|TKT_HUMAN	NMAEQIIQEIYSQIQSK	iTRAQ8plex@N-term; Oxidation(M)@2; iTRAQ8plex(K)@17		2646.41	3	99	14	4.92197	0.0584141	15	82.0593	82.1563
620	17	sp|P29401|TKT_HUMAN	NSTFSEIFK	iTRAQ8plex@N-term; iTRAQ8plex(K)@9		1679.93	2	99	11	4.68276	1	2	61.6	61.5425
621	17	sp|P29401|TKT_HUMAN	QAFTDVATGSLGQGLGAACGMAYTGK	iTRAQ8plex@N-term; Methylthio(C)@19; iTRAQ8plex(K)@26		3128.56	3	99	18	5.14831	1	5	77.9597	77.9317
622	17	sp|P29401|TKT_HUMAN	SKDDQVTVIGAGVTLHEALAAAELLK	iTRAQ8plex@N-term; iTRAQ8plex(K)@2; iTRAQ8plex(K)@26	missed K-D@2	3561.05	4	99	11	4.20919	1	3	77.6134	77.5733
623	17	sp|P29401|TKT_HUMAN	SVPTSTVFYPSDGVATEK	iTRAQ8plex@N-term; iTRAQ8plex(K)@18		2492.33	2	99	17	4.86451	1	8	58.7157	58.7209
624	17	sp|P29401|TKT_HUMAN	TSRPENAIIYNNNEDFQVGQAK	iTRAQ8plex@N-term; iTRAQ8plex(K)@22		3115.61	2	99	13	4.4651	0.791757	5	55.279	55.2859
625	17	sp|P29401|TKT_HUMAN	TSRPENAIIYNNNEDFQVGQAK	iTRAQ8plex@N-term; Deamidated(N)@6; iTRAQ8plex(K)@22		3116.6	3	98.71	11	3.88508	0.208243	1	55.6733	55.633
626	17	sp|P29401|TKT_HUMAN	TVPFCSTFAAFFTR	iTRAQ8plex@N-term; Methylthio(C)@5		1943.96	2	99	15	4.96528	1	16	89.7722	89.8478
627	17	sp|P29401|TKT_HUMAN	VLDPFTIKPLDR	iTRAQ8plex@N-term; iTRAQ8plex(K)@8		2021.21	2	99	15	5.52749	1	15	66.3001	66.3337
628	18	sp|P52209|6PGD_HUMAN	AGQAVDDFIEK	iTRAQ8plex@N-term; iTRAQ8plex(K)@11		1799.99	2	99	15	5.33722	1	11	60.6102	60.6271
629	18	sp|P52209|6PGD_HUMAN	DAFDRNPELQNLLLDDFFK	iTRAQ8plex@N-term; iTRAQ8plex(K)@19	missed R-N@5	2917.54	3	99	15	5.25321	1	11	77.6728	77.7223
630	18	sp|P52209|6PGD_HUMAN	DVLGMAQDEMAQAFEDWNK	iTRAQ8plex@N-term; iTRAQ8plex(K)@19		2805.36	2	99	15	5.75203	0.896391	11	84.3072	84.178
631	18	sp|P52209|6PGD_HUMAN	DVLGMAQDEMAQAFEDWNK	iTRAQ8plex@N-term; Oxidation(M)@5; iTRAQ8plex(K)@19		2821.35	3	99	11	4.81493	0.103609	4	79.6714	79.6916
632	18	sp|P52209|6PGD_HUMAN	IILLVK	iTRAQ8plex@N-term; iTRAQ8plex(K)@6		1305.92	2	99	9	4.91534	1	27	65.7968	65.812
633	18	sp|P52209|6PGD_HUMAN	IISYAQGFMLLR	iTRAQ8plex@N-term		1714.97	1	99	11	5.11651	1	17	82.4627	82.5162
634	18	sp|P52209|6PGD_HUMAN	IKDAFDRNPELQNLLLDDFFK	iTRAQ8plex@N-term; iTRAQ8plex(K)@2; iTRAQ8plex(K)@21	missed K-D@2; missed R-N@7	3462.93	5	99	14	5.48697	1	9	76.8882	76.9404
635	18	sp|P52209|6PGD_HUMAN	LVPLLDTGDIIIDGGNSEYR	iTRAQ8plex@N-term		2463.32	1	99	16	5.67223	0.887781	17	81.4781	81.5831
636	18	sp|P52209|6PGD_HUMAN	LVPLLDTGDIIIDGGNSEYR	iTRAQ8plex@N-term; Deamidated(N)@16		2464.3	2	99	15	4.77399	0.112219	15	80.8877	80.9924
637	18	sp|P52209|6PGD_HUMAN	NPELQNLLLDDFFK	iTRAQ8plex@N-term; iTRAQ8plex(K)@14		2313.28	2	99	14	4.98402	1	26	79.8206	79.9157
638	18	sp|P52209|6PGD_HUMAN	SAVENCQDSWR	iTRAQ8plex@N-term; Methylthio(C)@6		1643.73	2	99	9	4.04179	1	4	55.1562	55.1158
639	18	sp|P52209|6PGD_HUMAN	SFLEDIR	iTRAQ8plex@N-term		1182.66	1	98.52	10	4.86786	1	4	59.1017	59.1203
640	18	sp|P52209|6PGD_HUMAN	SVFLGK	iTRAQ8plex@N-term; iTRAQ8plex(K)@6		1257.79	2	99	7	3.98989	1	6	53.4546	53.5356
641	18	sp|P52209|6PGD_HUMAN	TELDSFLIEITANILK	iTRAQ8plex@N-term; iTRAQ8plex(K)@16		2427.41	2	99	14	4.21825	1	4	96.0831	96.05
642	18	sp|P52209|6PGD_HUMAN	TIFQGIAAK	iTRAQ8plex@N-term; iTRAQ8plex(K)@9		1555.95	2	99	12	4.53228	1	6	58.4995	58.5064
643	18	sp|P52209|6PGD_HUMAN	VDDFLANEAK	iTRAQ8plex@N-term; iTRAQ8plex(K)@10		1728.95	2	99	11	4.72607	1	2	60.0392	60.1028
644	18	sp|P52209|6PGD_HUMAN	VGTGEPCCDWVGDEGAGHFVK	iTRAQ8plex@N-term; Methylthio(C)@7; Methylthio(C)@8; iTRAQ8plex(K)@21		2862.31	4	99	17	4.85946	1	4	69.5446	69.5615
645	19	sp|P06733|ENOA_HUMAN	AAVPSGASTGIYEALELR	iTRAQ8plex@N-term		2108.14	1	99	15	5.82572	1	12	69.0971	68.8497
646	19	sp|P06733|ENOA_HUMAN	DATNVGDEGGFAPNILENK	iTRAQ8plex@N-term; iTRAQ8plex(K)@19		2568.33	2	99	14	4.5116	1	3	62.9475	62.9109
647	19	sp|P06733|ENOA_HUMAN	DYPVVSIEDPFDQDDWGAWQK	iTRAQ8plex@N-term; iTRAQ8plex(K)@21		3117.52	2	99	15	4.9078	1	8	77.047	77.099
648	19	sp|P06733|ENOA_HUMAN	EGLELLK	iTRAQ8plex@N-term; iTRAQ8plex(K)@7		1408.88	2	97.76	11	4.26347	1	3	58.2594	58.2747
649	19	sp|P06733|ENOA_HUMAN	FTASAGIQVVGDDLTVTNPK	iTRAQ8plex@N-term; iTRAQ8plex(K)@20		2640.46	2	99	12	4.36165	1	1	67.8113	67.7746
650	19	sp|P06733|ENOA_HUMAN	GNPTVEVDLFTSK	iTRAQ8plex@N-term; iTRAQ8plex(K)@13		2014.12	2	99	20	5.48136	0.505265	27	63.268	63.3185
651	19	sp|P06733|ENOA_HUMAN	GNPTVEVDLFTSK	iTRAQ8plex@N-term; Deamidated(N)@2; iTRAQ8plex(K)@13		2015.1	3	99	13	5.47221	0.494735	3	62.4249	62.4032
652	19	sp|P06733|ENOA_HUMAN	IEEELGSK	iTRAQ8plex@N-term; iTRAQ8plex(K)@8		1511.87	2	99	10	4.79083	1	7	54.422	54.5876
653	19	sp|P06733|ENOA_HUMAN	IGAEVYHNLK	iTRAQ8plex@N-term; iTRAQ8plex(K)@10		1751.02	2	99	10	4.58304	0.919099	16	56.0019	55.898
654	19	sp|P06733|ENOA_HUMAN	IGAEVYHNLK	iTRAQ8plex@N-term; Deamidated(N)@8; iTRAQ8plex(K)@10		1752	3	98.72	9	3.52763	0.0809007	2	55.378	55.3982
655	19	sp|P06733|ENOA_HUMAN	LAMQEFMILPVGAANFR	iTRAQ8plex@N-term		2211.19	1	99	18	4.77273	0.6187	7	80.8977	80.8583
656	19	sp|P06733|ENOA_HUMAN	LAMQEFMILPVGAANFR	iTRAQ8plex@N-term; Deamidated(N)@15		2212.17	2	99	14	4.56252	0.3813	2	81.9127	81.9763
657	19	sp|P06733|ENOA_HUMAN	LMIEMDGTENK	iTRAQ8plex@N-term; iTRAQ8plex(K)@11		1887.99	2	99	16	5.48078	1	16	59.1067	59.1203
658	19	sp|P06733|ENOA_HUMAN	LNVTEQEK	iTRAQ8plex@N-term; iTRAQ8plex(K)@8		1567.9	2	99	12	3.73894	1	6	48.0679	48.0732
659	19	sp|P06733|ENOA_HUMAN	SCNCLLLK	iTRAQ8plex@N-term; Methylthio(C)@2; Methylthio(C)@4; iTRAQ8plex(K)@8		1592.84	4	99	9	4.62575	1	6	67.9181	67.9517
660	19	sp|P06733|ENOA_HUMAN	SGETEDTFIADLVVGLCTGQIK	iTRAQ8plex@N-term; Methylthio(C)@17; iTRAQ8plex(K)@22		2949.53	3	99	18	4.7054	1	5	97.594	97.6293
661	19	sp|P06733|ENOA_HUMAN	VNQIGSVTESLQACK	iTRAQ8plex@N-term; Methylthio(C)@14; iTRAQ8plex(K)@15		2230.19	3	98.82	11	4.61971	1	2	66.8381	66.8049
662	19	sp|P06733|ENOA_HUMAN	YISPDQLADLYK	iTRAQ8plex@N-term; iTRAQ8plex(K)@12		2033.13	2	99	15	5.88842	1	19	67.0845	66.9708
663	20	sp|P04083|ANXA1_HUMAN	ALTGHLEEVVLALLK	iTRAQ8plex@N-term; iTRAQ8plex(K)@15		2213.36	2	99	11	5.77431	1	18	84.2307	84.3573
664	20	sp|P04083|ANXA1_HUMAN	ALYEAGER	iTRAQ8plex@N-term		1211.65	1	99	11	3.86682	1	6	46.1052	46.1623
665	20	sp|P04083|ANXA1_HUMAN	CLTAIVK	iTRAQ8plex@N-term; Methylthio(C)@1; iTRAQ8plex(K)@7		1400.83	3	98.1	8	4.22502	1	1	63.6455	63.6357
666	20	sp|P04083|ANXA1_HUMAN	DITSDTSGDFR	iTRAQ8plex@N-term		1516.73	1	99	16	4.00126	1	9	50.0398	50.0451
667	20	sp|P04083|ANXA1_HUMAN	GDRSEDFGVNEDLADSDAR	iTRAQ8plex@N-term	missed R-S@3	2371.08	2	99	12	3.89498	1	5	52.2673	52.2725
668	20	sp|P04083|ANXA1_HUMAN	GGPGSAVSPYPTFNPSSDVAALHK	iTRAQ8plex@N-term; iTRAQ8plex(K)@24		2963.56	2	99	17	5.04834	1	6	60.861	60.8257
669	20	sp|P04083|ANXA1_HUMAN	GLGTDEDTLIEILASR	iTRAQ8plex@N-term		2006.08	1	99	27	6.00319	1	20	80.287	80.2939
670	20	sp|P04083|ANXA1_HUMAN	GTDVNVFNTILTTR	iTRAQ8plex@N-term		1854.02	1	99	9	4.53807	1	4	70.1292	70.1511
671	20	sp|P04083|ANXA1_HUMAN	GVDEATIIDILTK	iTRAQ8plex@N-term; iTRAQ8plex(K)@13		1995.17	2	99	14	4.79723	1	18	77.4929	77.4849
672	20	sp|P04083|ANXA1_HUMAN	ILVALCGGN	iTRAQ8plex@N-term; Methylthio(C)@6		1208.66	2	99	8	5.25385	1	24	88.402	87.9929
673	20	sp|P04083|ANXA1_HUMAN	MYGISLCQAILDETK	iTRAQ8plex@N-term; Methylthio(C)@7; iTRAQ8plex(K)@15		2338.22	3	99	13	5.09365	0.685773	11	85.7498	85.6768
674	20	sp|P04083|ANXA1_HUMAN	MYGISLCQAILDETK	iTRAQ8plex@N-term; Methylthio(C)@7; Deamidated(Q)@8; iTRAQ8plex(K)@15		2339.2	4	99	13	4.75472	0.314227	1	87.4601	87.5202
675	20	sp|P04083|ANXA1_HUMAN	MYGISLCQAILDETKGDYEK	iTRAQ8plex@N-term; Methylthio(C)@7; iTRAQ8plex(K)@15; iTRAQ8plex(K)@20	missed K-G@15	3234.67	5	99	9	4.72102	1	5	81.6478	81.5042
676	20	sp|P04083|ANXA1_HUMAN	NALLSLAK	iTRAQ8plex@N-term; iTRAQ8plex(K)@8		1436.92	2	98.74	9	3.53757	1	2	60.5105	60.4951
677	20	sp|P04083|ANXA1_HUMAN	SEDFGVNEDLADSDAR	iTRAQ8plex@N-term		2042.93	1	99	18	4.91532	1	9	56.8009	56.8496
678	20	sp|P04083|ANXA1_HUMAN	VLDLELK	iTRAQ8plex@N-term; iTRAQ8plex(K)@7		1436.91	2	98.65	8	5.12199	1	17	63.5869	63.6678
679	20	sp|P04083|ANXA1_HUMAN	VLDLELKGDIEK	iTRAQ8plex@N-term; iTRAQ8plex(K)@7; iTRAQ8plex(K)@12	missed K-G@7	2283.38	4	99	15	5.47028	1	10	61.8138	61.8812
680	21	sp|P08107|HSP71_HUMAN	AFYPEEISSMVLTK	iTRAQ8plex@N-term; iTRAQ8plex(K)@14		2222.21	2	99	16	4.81046	1	17	72.0267	72.0773
681	21	sp|P08107|HSP71_HUMAN	AQIHDLVLVGGSTR	iTRAQ8plex@N-term		1769.01	1	99	16	4.82718	1	9	56.6185	56.6303
682	21	sp|P08107|HSP71_HUMAN	CQEVISWLDANTLAEKDEFEHK	iTRAQ8plex@N-term; Methylthio(C)@1; iTRAQ8plex(K)@16; iTRAQ8plex(K)@22	missed K-D@16	3562.82	5	99	12	5.31231	1	5	81.3969	81.2386
683	21	sp|P08107|HSP71_HUMAN	DAGVIAGLNVLR	iTRAQ8plex@N-term		1500.89	1	99	15	4.95078	1	16	66.5012	66.4667
684	21	sp|P08107|HSP71_HUMAN	ELEQVCNPIISGLYQGAGGPGPGGFGAQGPK	iTRAQ8plex@N-term; Methylthio(C)@6; iTRAQ8plex(K)@31		3651.86	3	99	13	4.62879	0.687188	28	81.7448	81.707
685	21	sp|P08107|HSP71_HUMAN	ELEQVCNPIISGLYQGAGGPGPGGFGAQGPK	iTRAQ8plex@N-term; Methylthio(C)@6; Deamidated(Q)@28; iTRAQ8plex(K)@31		3652.85	4	99	13	4.287	0.312812	1	82.7727	82.8674
686	21	sp|P08107|HSP71_HUMAN	FEELCSDLFR	iTRAQ8plex@N-term; Methylthio(C)@5		1607.76	2	99	8	4.55008	1	8	89.8549	89.9805
687	21	sp|P08107|HSP71_HUMAN	IINEPTAAAIAYGLDR	iTRAQ8plex@N-term		1991.1	1	99	8	4.34951	1	1	69.1568	69.1403
688	21	sp|P08107|HSP71_HUMAN	LIGDAAK	iTRAQ8plex@N-term; iTRAQ8plex(K)@7		1294.81	2	99	10	4.0331	1	4	50.4134	50.4918
689	21	sp|P08107|HSP71_HUMAN	LLQDFFNGR	iTRAQ8plex@N-term; Deamidated(N)@7		1413.76	2	99	11	4.70705	1	69	76.6952	76.7288
690	21	sp|P08107|HSP71_HUMAN	LVNHFVEEFK	iTRAQ8plex@N-term; iTRAQ8plex(K)@10		1869.06	2	99	8	5.17491	1	19	65.6967	65.5864
691	21	sp|P08107|HSP71_HUMAN	MVQEAEK	iTRAQ8plex@N-term; iTRAQ8plex(K)@7		1441.81	2	99	11	3.63225	1	6	45.5049	45.5301
692	21	sp|P08107|HSP71_HUMAN	NALESYAFNMK	iTRAQ8plex@N-term; iTRAQ8plex(K)@11		1895.01	2	99	11	4.91397	1	3	63.8395	63.7714
693	21	sp|P08107|HSP71_HUMAN	QTQIFTTYSDNQPGVLIQVYEGER	iTRAQ8plex@N-term		3089.56	1	99	14	4.37258	1	2	71.3007	71.1782
694	21	sp|P08107|HSP71_HUMAN	SAVEDEGLK	iTRAQ8plex@N-term; iTRAQ8plex(K)@9		1554.87	2	99	11	3.65312	1	6	47.3658	47.3402
695	21	sp|P08107|HSP71_HUMAN	SENVQDLLLLDVAPLSLGLETAGGVMTALIK	iTRAQ8plex@N-term; iTRAQ8plex(K)@31		3788.15	2	99	18	3.88969	1	1	98.2711	98.2377
696	21	sp|P08107|HSP71_HUMAN	TTPSYVAFTDTER	iTRAQ8plex@N-term		1790.9	1	99	14	4.28484	1	7	55.8604	55.8723
697	22	sp|P67936|TPM4_HUMAN	AEFAER	iTRAQ8plex@N-term		1025.54	1	99	9	3.42488	1	2	43.3187	43.3792
698	22	sp|P67936|TPM4_HUMAN	AEVSELK	iTRAQ8plex@N-term; iTRAQ8plex(K)@7		1382.82	2	98.01	11	3.76215	1	6	48.7689	48.8315
699	22	sp|P67936|TPM4_HUMAN	CGDLEEELK	iTRAQ8plex@N-term; Methylthio(C)@1; iTRAQ8plex(K)@9		1688.86	3	98.78	10	4.6813	1	5	63.5857	63.7468
700	22	sp|P67936|TPM4_HUMAN	EENVGLHQTLDQTLNELNCI	iTRAQ8plex@N-term; Methylthio(C)@19		2632.28	2	99	11	5.52888	1	7	78.9603	79.0611
701	22	sp|P67936|TPM4_HUMAN	HIAEEADR	iTRAQ8plex@N-term		1243.65	1	99	10	3.87116	1	5	36.092	36.1644
702	22	sp|P67936|TPM4_HUMAN	IQALQQQADEAEDR	iTRAQ8plex@N-term		1917.97	1	99	11	4.33778	1	1	59.3376	59.2211
703	22	sp|P67936|TPM4_HUMAN	IQLVEEELDR	iTRAQ8plex@N-term		1546.85	1	99	15	5.38174	1	83	73.2646	73.4153
704	22	sp|P67936|TPM4_HUMAN	KIQALQQQADEAEDR	iTRAQ8plex@N-term; iTRAQ8plex(K)@1	missed K-I@1	2350.27	3	99	12	4.11926	1	9	55.1658	55.171
705	22	sp|P67936|TPM4_HUMAN	KLVILEGELER	iTRAQ8plex@N-term; iTRAQ8plex(K)@1	missed K-L@1	1906.17	3	99	8	4.51228	1	9	64.5387	64.574
706	22	sp|P67936|TPM4_HUMAN	LATALQK	iTRAQ8plex@N-term; iTRAQ8plex(K)@7		1351.86	2	99	9	4.22706	1	8	54.5905	54.6241
707	22	sp|P67936|TPM4_HUMAN	LVILEGELER	iTRAQ8plex@N-term		1473.87	1	99	10	4.66985	1	19	71.9516	71.8968
708	22	sp|P67936|TPM4_HUMAN	MEIQEMQLK	iTRAQ8plex@N-term; iTRAQ8plex(K)@9		1756.97	2	99	10	4.84714	1	6	58.5599	58.5386
709	22	sp|P67936|TPM4_HUMAN	RIQLVEEELDR	iTRAQ8plex@N-term	missed R-I@1	1702.95	2	99	16	5.00101	1	2	58.2878	58.313
710	22	sp|P67936|TPM4_HUMAN	SLEAASEK	iTRAQ8plex@N-term; iTRAQ8plex(K)@8		1441.82	2	99	12	3.58838	1	1	45.1778	45.1377
711	22	sp|P67936|TPM4_HUMAN	TIDDLEEK	iTRAQ8plex@N-term; iTRAQ8plex(K)@8		1569.87	2	98.63	10	4.30903	1	6	52.6132	52.7259
712	23	sp|P06737|PYGL_HUMAN	AWNTMVLK	iTRAQ8plex@N-term; iTRAQ8plex(K)@8		1569.92	2	99	10	4.2382	1	6	60.2475	60.3245
713	23	sp|P06737|PYGL_HUMAN	DFNVGDYIQAVLDR	iTRAQ8plex@N-term		1927.99	1	99	21	5.58861	0.899023	9	82.3726	82.4712
714	23	sp|P06737|PYGL_HUMAN	DFNVGDYIQAVLDR	iTRAQ8plex@N-term; Deamidated(Q)@9		1928.98	2	99	10	4.63906	0.100977	1	83.9525	84.116
715	23	sp|P06737|PYGL_HUMAN	DGWQVEEADDWLR	iTRAQ8plex@N-term		1921.91	1	99	14	4.95782	1	8	68.5604	68.5824
716	23	sp|P06737|PYGL_HUMAN	DIINMLFYHDR	iTRAQ8plex@N-term		1739.9	1	99	9	5.09292	1	1	71.5468	71.35
717	23	sp|P06737|PYGL_HUMAN	DYYFALAHTVR	iTRAQ8plex@N-term		1658.87	1	99	13	4.51656	1	1	59.2933	59.3218
718	23	sp|P06737|PYGL_HUMAN	FSQFLETEYK	iTRAQ8plex@N-term; iTRAQ8plex(K)@10		1899.02	2	99	10	4.76173	1	4	67.5668	67.5887
719	23	sp|P06737|PYGL_HUMAN	GIVGVENVAELK	iTRAQ8plex@N-term; iTRAQ8plex(K)@12		1835.1	2	99	14	4.57266	1	8	61.7511	61.7746
720	23	sp|P06737|PYGL_HUMAN	LHSFLGDDVFLR	iTRAQ8plex@N-term		1721.94	1	99	13	4.85556	1	3	68.0739	68.1042
721	23	sp|P06737|PYGL_HUMAN	LITSVADVVNNDPMVGSK	iTRAQ8plex@N-term; iTRAQ8plex(K)@18		2466.36	2	99	13	4.45697	1	4	74.2422	74.2591
722	23	sp|P06737|PYGL_HUMAN	LKQEYFVVAATLQDIIR	iTRAQ8plex@N-term; iTRAQ8plex(K)@2	missed K-Q@2	2614.53	3	99	11	4.71882	1	6	86.0924	86.1259
723	23	sp|P06737|PYGL_HUMAN	LVIDQIDNGFFSPK	iTRAQ8plex@N-term; iTRAQ8plex(K)@14		2200.24	2	99	12	4.92641	0.421475	1	71.9851	71.9552
724	23	sp|P06737|PYGL_HUMAN	LVIDQIDNGFFSPK	iTRAQ8plex@N-term; Deamidated(N)@8; iTRAQ8plex(K)@14		2201.22	3	99	16	5.06396	0.578525	9	72.5883	72.6102
725	23	sp|P06737|PYGL_HUMAN	QLLNCLHVITMYNR	Gln->pyro-Glu@N-term; Methylthio(C)@5		1745.84	2	99	14	4.8491	1	7	85.9845	85.9464
726	23	sp|P06737|PYGL_HUMAN	VFADYEAYVK	iTRAQ8plex@N-term; iTRAQ8plex(K)@10		1811.99	2	99	10	4.69694	1	3	66.5278	66.4721
727	23	sp|P06737|PYGL_HUMAN	VIFLENYR	iTRAQ8plex@N-term		1356.77	1	98.26	9	4.49779	1	2	66.4399	66.5114
728	24	sp|P02675|FIBB_HUMAN	AHYGGFTVQNEANK	iTRAQ8plex@N-term; iTRAQ8plex(K)@14		2143.13	2	99	14	3.80611	1	5	48.4099	48.4151
729	24	sp|P02675|FIBB_HUMAN	DNENVVNEYSSELEK	iTRAQ8plex@N-term; iTRAQ8plex(K)@15		2376.19	2	99	14	4.52908	1	3	59.6818	59.6921
730	24	sp|P02675|FIBB_HUMAN	GGETSEMYLIQPDSSVKPYR	iTRAQ8plex@N-term; iTRAQ8plex(K)@17		2864.48	2	99	14	4.38536	1	2	58.3123	58.3192
731	24	sp|P02675|FIBB_HUMAN	HGTDDGVVWMNWK	iTRAQ8plex@N-term; iTRAQ8plex(K)@13		2152.1	2	99	13	4.57075	1	8	61.7639	61.7456
732	24	sp|P02675|FIBB_HUMAN	HQLYIDETVNSNIPTNLR	iTRAQ8plex@N-term; Deamidated(N)@12		2431.26	2	99	13	4.29693	1	4	58.4427	58.4496
733	24	sp|P02675|FIBB_HUMAN	KAPDAGGCLHADPDLGVLCPTGCQLQEALLQQERPIR	iTRAQ8plex@N-term; iTRAQ8plex(K)@1; Methylthio(C)@8; Methylthio(C)@19; Methylthio(C)@23	missed K-A@1	4658.32	6	99	11	4.87603	1	3	75.0971	75.2069
734	24	sp|P02675|FIBB_HUMAN	LESDVSAQMEYCR	iTRAQ8plex@N-term; Methylthio(C)@12		1879.84	2	99	13	5.26475	1	7	66.62	66.6922
735	24	sp|P02675|FIBB_HUMAN	MGPTELLIEMEDWK	iTRAQ8plex@N-term; iTRAQ8plex(K)@14		2299.21	2	99	12	4.80817	1	25	82.3503	82.3416
736	24	sp|P02675|FIBB_HUMAN	MGPTELLIEMEDWKGDK	iTRAQ8plex@N-term; iTRAQ8plex(K)@14; iTRAQ8plex(K)@17	missed K-G@14	2903.55	4	99	11	4.50147	1	2	75.3114	75.3317
737	24	sp|P02675|FIBB_HUMAN	NYCGLPGEYWLGNDK	iTRAQ8plex@N-term; Methylthio(C)@3; iTRAQ8plex(K)@15		2382.16	3	99	17	5.06924	0.762785	11	71.6117	71.714
738	24	sp|P02675|FIBB_HUMAN	NYCGLPGEYWLGNDK	iTRAQ8plex@N-term; Methylthio(C)@3; Deamidated(N)@13; iTRAQ8plex(K)@15		2383.14	4	99	13	4.56198	0.237215	10	71.1163	71.1332
739	24	sp|P02675|FIBB_HUMAN	REEAPSLRPAPPPISGGGYR	iTRAQ8plex@N-term	missed R-E@1	2410.3	2	99	15	3.9428	1	2	49.6946	49.6999
740	24	sp|P02675|FIBB_HUMAN	SILENLR	iTRAQ8plex@N-term		1147.69	1	98.03	9	4.78643	1	3	57.5788	57.5547
741	24	sp|P02675|FIBB_HUMAN	TPCTVSCNIPVVSGK	iTRAQ8plex@N-term; Methylthio(C)@3; Methylthio(C)@7; iTRAQ8plex(K)@15		2204.13	4	99	12	4.96948	1	5	69.8606	69.915
742	24	sp|P02675|FIBB_HUMAN	VYCDMNTENGGWTVIQNR	iTRAQ8plex@N-term; Methylthio(C)@3; Deamidated(N)@9		2450.1	3	99	21	5.25976	1	6	69.2367	69.2502
743	24	sp|P02675|FIBB_HUMAN	YYWGGQYTWDMAK	iTRAQ8plex@N-term; iTRAQ8plex(K)@13		2276.12	2	99	14	4.77792	1	9	67.1766	67.2019
744	25	sp|P11215|ITAM_HUMAN	DHVFQVNNFEALK	iTRAQ8plex@N-term; iTRAQ8plex(K)@13		2168.18	2	97.96	12	4.62564	1	3	61.4463	61.428
745	25	sp|P11215|ITAM_HUMAN	EFVSTVMEQLK	iTRAQ8plex@N-term; iTRAQ8plex(K)@11		1918.07	2	99	12	4.57748	1	6	70.6749	70.6364
746	25	sp|P11215|ITAM_HUMAN	FGDPLGYEDVIPEADR	iTRAQ8plex@N-term		2096.04	1	99	15	4.69516	1	7	69.3544	69.326
747	25	sp|P11215|ITAM_HUMAN	FGDPLGYEDVIPEADREGVIR	iTRAQ8plex@N-term	missed R-E@16	2650.35	2	99	10	4.40976	1	5	68.8792	68.9095
748	25	sp|P11215|ITAM_HUMAN	GLCFLFGSNLR	iTRAQ8plex@N-term; Methylthio(C)@3		1575.82	2	99	11	5.38511	1	15	78.9938	79.0611
749	25	sp|P11215|ITAM_HUMAN	ILVVITDGEK	iTRAQ8plex@N-term; iTRAQ8plex(K)@10		1694.04	2	99	11	4.37031	1	2	70.5565	70.632
750	25	sp|P11215|ITAM_HUMAN	LACESASSTEVSGALK	iTRAQ8plex@N-term; Methylthio(C)@3; iTRAQ8plex(K)@16		2206.14	3	99	16	4.74199	1	2	59.5727	59.5342
751	25	sp|P11215|ITAM_HUMAN	LFTALFPFEK	iTRAQ8plex@N-term; iTRAQ8plex(K)@10		1820.07	2	99	7	4.59975	1	2	83.3674	83.4434
752	25	sp|P11215|ITAM_HUMAN	LPSHSDFLAELR	iTRAQ8plex@N-term		1687.92	1	99	14	5.0161	1	2	61.6992	61.6842
753	25	sp|P11215|ITAM_HUMAN	LQLPNCIEDPVSPIVLR	iTRAQ8plex@N-term; Methylthio(C)@6		2255.23	2	99	12	4.69705	1	1	80.1352	80.1588
754	25	sp|P11215|ITAM_HUMAN	MKEFVSTVMEQLK	iTRAQ8plex@N-term; iTRAQ8plex(K)@2; iTRAQ8plex(K)@13	missed K-E@2	2481.41	4	97.63	9	5.14186	1	1	78.049	78.0776
755	25	sp|P11215|ITAM_HUMAN	QTQVLGLTQTCETLK	iTRAQ8plex@N-term; Methylthio(C)@11; iTRAQ8plex(K)@15		2316.26	3	99	15	4.51212	1	6	68.9256	68.8944
756	25	sp|P11215|ITAM_HUMAN	SLPISLVFLVPVR	iTRAQ8plex@N-term		1743.1	1	99	10	5.20363	1	10	83.4528	83.4162
757	25	sp|P11215|ITAM_HUMAN	TLFSLMQYSEEFR	iTRAQ8plex@N-term		1953.98	1	99	10	4.72487	1	6	78.7158	78.8805
758	25	sp|P11215|ITAM_HUMAN	TQVTFFFPLDLSYR	iTRAQ8plex@N-term		2037.09	1	99	15	5.10454	0.770174	9	80.896	81.0372
759	25	sp|P11215|ITAM_HUMAN	TQVTFFFPLDLSYR	iTRAQ8plex@N-term; Deamidated(Q)@2		2038.07	2	99	13	4.57935	0.229826	1	81.4316	81.55
760	26	sp|P08133|ANXA6_HUMAN	ALIEILATR	iTRAQ8plex@N-term		1302.82	1	99	8	4.62182	1	4	70.2067	70.2303
761	26	sp|P08133|ANXA6_HUMAN	ALLALCGGED	iTRAQ8plex@N-term; Methylthio(C)@6		1310.65	2	99	9	5.05407	1	11	81.9478	81.7966
762	26	sp|P08133|ANXA6_HUMAN	DLIADLK	iTRAQ8plex@N-term; iTRAQ8plex(K)@7		1394.86	2	99	9	4.26387	1	5	60.3838	60.3265
763	26	sp|P08133|ANXA6_HUMAN	EAILDIITSR	iTRAQ8plex@N-term		1433.84	1	99	9	4.47173	1	6	73.534	73.5916
764	26	sp|P08133|ANXA6_HUMAN	EDAQVAAEILEIADTPSGDK	iTRAQ8plex@N-term; iTRAQ8plex(K)@20		2679.41	2	99	13	4.41457	1	3	76.6754	76.6392
765	26	sp|P08133|ANXA6_HUMAN	EEDDVVSEDLVQQDVQDLYEAGELK	iTRAQ8plex@N-term; iTRAQ8plex(K)@25		3472.72	2	99	10	4.18523	1	2	77.85	77.7223
766	26	sp|P08133|ANXA6_HUMAN	GFGSDKEAILDIITSR	iTRAQ8plex@N-term; iTRAQ8plex(K)@6	missed K-E@6	2329.31	3	99	15	4.95553	1	12	74.0477	74.1701
767	26	sp|P08133|ANXA6_HUMAN	GIGTDEK	iTRAQ8plex@N-term; iTRAQ8plex(K)@7	cleaved S-G@N-term	1326.76	3	97.92	11	3.64118	1	3	41.3637	41.3857
768	26	sp|P08133|ANXA6_HUMAN	GLGTDEDTIIDIITHR	iTRAQ8plex@N-term		2072.11	1	99	16	4.87061	1	5	73.9762	73.95
769	26	sp|P08133|ANXA6_HUMAN	GSIHDFPGFDPNQDAEALYTAMK	iTRAQ8plex@N-term; iTRAQ8plex(K)@23		3131.55	2	97.8	11	4.76975	1	1	72.4111	72.3364
770	26	sp|P08133|ANXA6_HUMAN	LILGLMMPPAHYDAK	iTRAQ8plex@N-term; iTRAQ8plex(K)@15		2277.28	2	99	11	4.7171	1	12	70.5121	70.3658
771	26	sp|P08133|ANXA6_HUMAN	LVFDEYLK	iTRAQ8plex@N-term; iTRAQ8plex(K)@8		1633.95	2	99	13	4.99589	1	8	65.8034	65.812
772	26	sp|P08133|ANXA6_HUMAN	SELDMLDIR	iTRAQ8plex@N-term		1394.74	1	99	8	4.32773	1	7	63.186	63.1317
773	26	sp|P08133|ANXA6_HUMAN	VFQEFIK	iTRAQ8plex@N-term; iTRAQ8plex(K)@7		1517.91	2	99	8	4.44348	1	6	65.8943	66.0202
774	27	sp|P26038|MOES_HUMAN	ALELEQER	iTRAQ8plex@N-term		1290.71	1	99	7	3.708	1	8	50.9772	50.9668
775	27	sp|P26038|MOES_HUMAN	ALTSELANAR	iTRAQ8plex@N-term		1348.76	1	99	11	4.6576	1	6	54.1175	53.9238
776	27	sp|P26038|MOES_HUMAN	AQMVQEDLEK	iTRAQ8plex@N-term; iTRAQ8plex(K)@10		1797.98	2	99	8	4.31235	1	2	57.2514	57.4548
777	27	sp|P26038|MOES_HUMAN	EDAVLEYLK	iTRAQ8plex@N-term; iTRAQ8plex(K)@9		1686.97	2	99	11	4.50974	1	10	65.9959	66.0244
778	27	sp|P26038|MOES_HUMAN	EVWFFGLQYQDTK	iTRAQ8plex@N-term; iTRAQ8plex(K)@13		2268.2	2	99	10	4.63478	1	2	73.0375	72.9243
779	27	sp|P26038|MOES_HUMAN	FYPEDVSEELIQDITQR	iTRAQ8plex@N-term		2385.2	1	99	15	5.1542	0.621809	25	83.0519	83.3713
780	27	sp|P26038|MOES_HUMAN	FYPEDVSEELIQDITQR	iTRAQ8plex@N-term; Deamidated(Q)@16		2386.18	2	99	14	4.93825	0.378191	1	83.7072	83.4162
781	27	sp|P26038|MOES_HUMAN	GFSTWLK	iTRAQ8plex@N-term; iTRAQ8plex(K)@7		1445.85	2	97.69	9	4.75219	1	8	61.5719	61.6038
782	27	sp|P26038|MOES_HUMAN	GMLREDAVLEYLK	iTRAQ8plex@N-term; iTRAQ8plex(K)@13	missed R-E@4	2144.21	3	99	13	4.8979	1	2	65.5836	65.6172
783	27	sp|P26038|MOES_HUMAN	GSELWLGVDALGLNIYEQNDR	iTRAQ8plex@N-term; Deamidated(N)@14		2666.35	2	99	8	4.2717	1	1	83.4299	83.4434
784	27	sp|P26038|MOES_HUMAN	IAQDLEMYGVNYFSIK	iTRAQ8plex@N-term; iTRAQ8plex(K)@16		2498.33	2	99	10	4.23892	1	1	81.3885	81.3629
785	27	sp|P26038|MOES_HUMAN	IGFPWSEIR	iTRAQ8plex@N-term		1407.78	1	99	10	4.9209	1	9	68.6751	68.6483
786	27	sp|P26038|MOES_HUMAN	KTQEQLALEMAELTAR	iTRAQ8plex@N-term; iTRAQ8plex(K)@1	missed K-T@1	2439.36	3	99	12	4.84524	1	5	64.0926	64.1212
787	27	sp|P26038|MOES_HUMAN	QLFDQVVK	iTRAQ8plex@N-term; iTRAQ8plex(K)@8		1583.95	2	97.67	11	4.47673	1	5	58.5322	58.5558
788	27	sp|P26038|MOES_HUMAN	TQEQLALEMAELTAR	iTRAQ8plex@N-term		2007.06	1	99	15	4.78598	1	7	70.9794	71.0381
789	27	sp|P26038|MOES_HUMAN	VTTMDAELEFAIQPNTTGK	iTRAQ8plex@N-term; iTRAQ8plex(K)@19		2673.41	2	99	11	4.42794	0.662823	4	70.0064	69.9698
790	27	sp|P26038|MOES_HUMAN	VTTMDAELEFAIQPNTTGK	iTRAQ8plex@N-term; Deamidated(Q)@13; iTRAQ8plex(K)@19		2674.4	3	99	9	4.1344	0.337177	1	69.2847	69.3098
791	28	sp|P02768|ALBU_HUMAN	AAFTECCQAADK	iTRAQ8plex@N-term; Methylthio(C)@6; Methylthio(C)@7; iTRAQ8plex(K)@12		1956.9	4	99	12	4.91727	1	3	65.4726	65.4961
792	28	sp|P02768|ALBU_HUMAN	AVMDDFAAFVEK	iTRAQ8plex@N-term; iTRAQ8plex(K)@12		1950.04	2	99	15	5.35155	1	13	74.4139	74.4375
793	28	sp|P02768|ALBU_HUMAN	DVFLGMFLYEYAR	iTRAQ8plex@N-term		1926.99	1	99	10	4.70516	1	7	84.8813	85.0472
794	28	sp|P02768|ALBU_HUMAN	ETYGEMADCCAK	iTRAQ8plex@N-term; Methylthio(C)@9; Methylthio(C)@10; iTRAQ8plex(K)@12		2019.87	4	99	14	4.68277	1	2	63.7936	63.8155
795	28	sp|P02768|ALBU_HUMAN	KVPQVSTPTLVEVSR	iTRAQ8plex@N-term; iTRAQ8plex(K)@1	missed K-V@1	2247.34	3	97.58	10	4.07372	1	6	55.764	55.7252
796	28	sp|P02768|ALBU_HUMAN	LVAASQAALGL	iTRAQ8plex@N-term		1316.8	1	99	9	4.38828	1	5	77.4123	77.2564
797	28	sp|P02768|ALBU_HUMAN	LVNEVTEFAK	iTRAQ8plex@N-term; iTRAQ8plex(K)@10		1757.02	2	99	11	4.63507	0.766345	8	66.0611	65.979
798	28	sp|P02768|ALBU_HUMAN	LVNEVTEFAK	iTRAQ8plex@N-term; Deamidated(N)@3; iTRAQ8plex(K)@10		1758	3	97.45	10	4.11922	0.233655	2	65.648	65.6315
799	28	sp|P02768|ALBU_HUMAN	QNCELFEQLGEYK	Gln->pyro-Glu@N-term; Methylthio(C)@3; iTRAQ8plex(K)@13		1932.89	3	99	11	4.52012	0.0838789	4	78.9637	78.9706
800	28	sp|P02768|ALBU_HUMAN	QNCELFEQLGEYK	iTRAQ8plex@N-term; Methylthio(C)@3; iTRAQ8plex(K)@13		2254.12	3	99	14	5.32354	0.533427	1	69.6299	69.687
801	28	sp|P02768|ALBU_HUMAN	QNCELFEQLGEYK	iTRAQ8plex@N-term; Methylthio(C)@3; Deamidated(Q)@8; iTRAQ8plex(K)@13		2255.11	4	99	11	5.17932	0.382694	1	69.6977	69.8515
802	28	sp|P02768|ALBU_HUMAN	RPCFSALEVDETYVPK	iTRAQ8plex@N-term; Methylthio(C)@3; iTRAQ8plex(K)@16		2507.3	3	97.8	10	5.05101	1	3	64.1613	64.1815
803	28	sp|P02768|ALBU_HUMAN	SHCIAEVENDEMPADLPSLAADFVESK	iTRAQ8plex@N-term; Methylthio(C)@3; iTRAQ8plex(K)@27		3570.71	3	99	13	3.93369	0.180015	21	80.8621	80.8673
804	28	sp|P02768|ALBU_HUMAN	SHCIAEVENDEMPADLPSLAADFVESK	iTRAQ8plex@N-term; Methylthio(C)@3; Deamidated(N)@9; iTRAQ8plex(K)@27		3571.7	4	99	17	4.59219	0.819985	2	78.1783	78.149
805	28	sp|P02768|ALBU_HUMAN	TCVADESAENCDK	iTRAQ8plex@N-term; Methylthio(C)@2; Methylthio(C)@11; iTRAQ8plex(K)@13		2083.91	4	99	15	3.7801	1	4	54.5378	54.4983
806	28	sp|P02768|ALBU_HUMAN	VFDEFKPLVEEPQNLIK	iTRAQ8plex@N-term; iTRAQ8plex(K)@6; iTRAQ8plex(K)@17		2956.7	3	99	12	5.26405	1	23	73.5823	73.5479
807	28	sp|P02768|ALBU_HUMAN	YICENQDSISSK	iTRAQ8plex@N-term; Methylthio(C)@3; iTRAQ8plex(K)@12		2040.01	3	99	14	4.70815	1	6	56.1417	56.1972
808	29	sp|P63261|ACTG_HUMAN; sp|P60709|ACTB_HUMAN	AGFAGDDAPR	iTRAQ8plex@N-term		1279.65	1	99	16	4.54435	1	43	45.1681	44.9787
809	29	sp|P63261|ACTG_HUMAN; sp|P60709|ACTB_HUMAN	AVFPSIVGRPR	iTRAQ8plex@N-term		1501.9	1	99	15	5.58918	1	21	55.0632	54.9966
810	29	sp|P63261|ACTG_HUMAN; sp|P60709|ACTB_HUMAN	DLTDYLMK	iTRAQ8plex@N-term; iTRAQ8plex(K)@8		1605.89	2	99	14	6.04728	0.768038	31	63.7209	63.7714
811	29	sp|P63261|ACTG_HUMAN; sp|P60709|ACTB_HUMAN	DLTDYLMK	iTRAQ8plex@N-term; Oxidation(M)@7; iTRAQ8plex(K)@8		1621.88	3	99	12	5.52731	0.231962	10	59.764	59.7859
812	29	sp|P63261|ACTG_HUMAN; sp|P60709|ACTB_HUMAN	DLYANTVLSGGTTMYPGIADR	iTRAQ8plex@N-term		2518.27	1	99	16	4.48279	0.096253	26	67.7191	67.7293
813	29	sp|P63261|ACTG_HUMAN; sp|P60709|ACTB_HUMAN	DLYANTVLSGGTTMYPGIADR	iTRAQ8plex@N-term; Deamidated(N)@5		2519.25	2	99	19	5.2512	0.564705	11	67.0013	67.0082
814	29	sp|P63261|ACTG_HUMAN; sp|P60709|ACTB_HUMAN	DLYANTVLSGGTTMYPGIADR	iTRAQ8plex@N-term; Oxidation(M)@14		2534.26	2	99	20	5.02963	0.339042	9	65.2396	65.2945
815	29	sp|P63261|ACTG_HUMAN; sp|P60709|ACTB_HUMAN	DSYVGDEAQSK	iTRAQ8plex@N-term; iTRAQ8plex(K)@11		1805.93	2	99	16	4.89387	1	24	45.8627	46.0445
816	29	sp|P63261|ACTG_HUMAN; sp|P60709|ACTB_HUMAN	GILTLK	iTRAQ8plex@N-term; iTRAQ8plex(K)@6		1251.84	2	97.78	6	5.57409	1	11	56.6181	56.7455
817	29	sp|P63261|ACTG_HUMAN; sp|P60709|ACTB_HUMAN	GYSFTTTAER	iTRAQ8plex@N-term		1435.72	1	99	14	5.06317	1	6	49.2812	49.3455
818	29	sp|P63261|ACTG_HUMAN; sp|P60709|ACTB_HUMAN	IWHHTFYNELR	iTRAQ8plex@N-term		1818.95	1	99	12	4.75045	1	7	55.2817	55.3136
819	29	sp|P63261|ACTG_HUMAN; sp|P60709|ACTB_HUMAN	KDLYANTVLSGGTTMYPGIADR	iTRAQ8plex@N-term; iTRAQ8plex(K)@1	missed K-D@1	2950.57	3	99	16	5.7984	1	12	64.6097	64.4391
820	29	sp|P63261|ACTG_HUMAN; sp|P60709|ACTB_HUMAN	LCYVALDFEQEMATAASSSSLEK	iTRAQ8plex@N-term; Methylthio(C)@2; iTRAQ8plex(K)@23		3146.54	3	99	15	5.02081	0.449678	23	96.9829	96.7871
821	29	sp|P63261|ACTG_HUMAN; sp|P60709|ACTB_HUMAN	LCYVALDFEQEMATAASSSSLEK	iTRAQ8plex@N-term; Methylthio(C)@2; Deamidated(Q)@10; iTRAQ8plex(K)@23		3147.53	4	99	12	5.10853	0.550322	1	96.7953	97.0648
822	29	sp|P63261|ACTG_HUMAN; sp|P60709|ACTB_HUMAN	SYELPDGQVITIGNER	iTRAQ8plex@N-term		2094.09	1	99	15	4.2717	1	2	66.0609	66.0661
823	29	sp|P63261|ACTG_HUMAN; sp|P60709|ACTB_HUMAN	TTGIVMDSGDGVTHTVPIYEGYALPHAILR	iTRAQ8plex@N-term		3486.81	1	99	17	5.57445	1	8	68.4409	68.5381
824	30	sp|P00338|LDHA_HUMAN	DDVFLSVPCILGQNGISDLVK	iTRAQ8plex@N-term; Methylthio(C)@9; iTRAQ8plex(K)@21		2885.55	3	99	10	4.8362	0.233915	3	88.1408	88.3923
825	30	sp|P00338|LDHA_HUMAN	DDVFLSVPCILGQNGISDLVK	iTRAQ8plex@N-term; Methylthio(C)@9; Deamidated(N)@14; iTRAQ8plex(K)@21		2886.53	4	99	17	5.35142	0.766085	14	87.164	87.2335
826	30	sp|P00338|LDHA_HUMAN	DLADELALVDVIEDK	iTRAQ8plex@N-term; iTRAQ8plex(K)@15		2265.26	2	99	12	5.06016	1	22	81.012	81.1374
827	30	sp|P00338|LDHA_HUMAN	DLADELALVDVIEDKLK	iTRAQ8plex@N-term; iTRAQ8plex(K)@15; iTRAQ8plex(K)@17	missed K-L@15	2810.64	4	99	10	4.15682	1	5	83.1323	83.1212
828	30	sp|P00338|LDHA_HUMAN	DQLIYNLLK	iTRAQ8plex@N-term; iTRAQ8plex(K)@9		1727.04	2	99	10	4.76526	1	23	71.2609	71.3574
829	30	sp|P00338|LDHA_HUMAN	FIIPNVVK	iTRAQ8plex@N-term; iTRAQ8plex(K)@8		1536.99	2	99	10	4.71396	1	8	64.5469	64.5788
830	30	sp|P00338|LDHA_HUMAN	GLYGIKDDVFLSVPCILGQNGISDLVK	iTRAQ8plex@N-term; iTRAQ8plex(K)@6; Methylthio(C)@15; iTRAQ8plex(K)@27	missed K-D@6	3821.12	5	99	13	4.87263	0.47137	7	87.0498	87.145
831	30	sp|P00338|LDHA_HUMAN	GLYGIKDDVFLSVPCILGQNGISDLVK	iTRAQ8plex@N-term; iTRAQ8plex(K)@6; Methylthio(C)@15; Deamidated(N)@20; iTRAQ8plex(K)@27	missed K-D@6	3822.11	6	99	12	4.92242	0.52863	14	87.802	87.7246
832	30	sp|P00338|LDHA_HUMAN	GYTSWAIGLSVADLAESIMK	iTRAQ8plex@N-term; iTRAQ8plex(K)@20		2719.47	2	99	14	5.43288	1	31	93.0798	92.8053
833	30	sp|P00338|LDHA_HUMAN	LLIVSNPVDILTYVAWK	iTRAQ8plex@N-term; iTRAQ8plex(K)@17		2551.52	2	99	13	5.05783	1	14	91.5817	91.7444
834	30	sp|P00338|LDHA_HUMAN	LVIITAGAR	iTRAQ8plex@N-term		1216.78	1	97.64	9	4.60204	1	5	60.2592	60.2344
835	30	sp|P00338|LDHA_HUMAN	QVVESAYEVIK	iTRAQ8plex@N-term; iTRAQ8plex(K)@11		1872.08	2	99	14	4.91148	1	5	62.1106	62.2264
836	30	sp|P00338|LDHA_HUMAN	SADTLWGIQK	iTRAQ8plex@N-term; iTRAQ8plex(K)@10		1725.99	2	99	13	5.0249	1	6	59.0827	59.0564
837	30	sp|P00338|LDHA_HUMAN	VIGSGCNLDSAR	iTRAQ8plex@N-term; Methylthio(C)@6		1540.76	2	99	15	4.4983	1	8	58.8643	58.8845
838	30	sp|P00338|LDHA_HUMAN	VTLTSEEEAR	iTRAQ8plex@N-term		1437.76	1	99	17	4.28502	1	10	47.621	47.6717
839	31	sp|O75083|WDR1_HUMAN	CFSIDNPGYEPEVVAVHPGGDTVAIGGVDGNVR	iTRAQ8plex@N-term; Methylthio(C)@1		3689.78	2	99	12	4.44627	1	2	71.0763	70.993
840	31	sp|O75083|WDR1_HUMAN	DHLLSVSLSGYINYLDR	iTRAQ8plex@N-term		2268.21	1	99	11	4.46577	1	1	73.8251	73.7529
841	31	sp|O75083|WDR1_HUMAN	FATASADGQIYIYDGK	iTRAQ8plex@N-term; iTRAQ8plex(K)@16		2327.23	2	99	16	5.05221	1	13	63.6288	63.6357
842	31	sp|O75083|WDR1_HUMAN	FGAVFLWDSGSSVGEITGHNK	iTRAQ8plex@N-term; iTRAQ8plex(K)@21		2815.48	2	99	11	4.79287	1	4	71.742	71.7173
843	31	sp|O75083|WDR1_HUMAN	IAVVGEGR	iTRAQ8plex@N-term		1103.66	1	99	11	3.48515	1	1	49.8163	49.7835
844	31	sp|O75083|WDR1_HUMAN	IWDVSVNSVVSTFPMGSTVLDQQLGCLWQK	iTRAQ8plex@N-term; Methylthio(C)@26; iTRAQ8plex(K)@30		3991.05	3	99	10	3.83181	1	1	90.7894	90.7576
845	31	sp|O75083|WDR1_HUMAN	LATGSDDNCAAFFEGPPFK	iTRAQ8plex@N-term; Methylthio(C)@9; iTRAQ8plex(K)@19		2640.28	3	99	17	4.72069	0.772205	27	77.9248	77.9766
846	31	sp|O75083|WDR1_HUMAN	LATGSDDNCAAFFEGPPFK	iTRAQ8plex@N-term; Deamidated(N)@8; Methylthio(C)@9; iTRAQ8plex(K)@19		2641.27	4	99	14	4.1905	0.227795	2	76.2322	76.1072
847	31	sp|O75083|WDR1_HUMAN	LYSILGTTLKDEGK	iTRAQ8plex@N-term; iTRAQ8plex(K)@10; iTRAQ8plex(K)@14	missed K-D@10	2449.46	4	99	10	5.01882	1	4	68.4439	68.5533
848	31	sp|O75083|WDR1_HUMAN	MTVDESGQLISCSMDDTVR	iTRAQ8plex@N-term; Methylthio(C)@12		2436.09	2	99	18	4.55861	1	5	68.8825	68.9391
849	31	sp|O75083|WDR1_HUMAN	NIDNPALADIYTEHAHQVVVAK	iTRAQ8plex@N-term; iTRAQ8plex(K)@22		3025.64	2	99	15	4.59335	1	3	59.3318	59.3845
850	31	sp|O75083|WDR1_HUMAN	VFASLPQVER	iTRAQ8plex@N-term		1448.83	1	99	9	4.21453	1	3	63.8026	63.8378
851	31	sp|O75083|WDR1_HUMAN	YAPSGFYIASGDVSGK	iTRAQ8plex@N-term; iTRAQ8plex(K)@16		2226.18	2	99	16	5.02024	1	5	60.4685	60.4372
852	31	sp|O75083|WDR1_HUMAN	YEYQPFAGK	iTRAQ8plex@N-term; iTRAQ8plex(K)@9		1709.92	2	98	8	4.11528	1	4	55.9219	55.898
853	32	sp|P04040|CATA_HUMAN	ADVLTTGAGNPVGDK	iTRAQ8plex@N-term; iTRAQ8plex(K)@15		2022.12	2	99	11	4.06066	1	4	54.8235	55.0164
854	32	sp|P04040|CATA_HUMAN	ADVLTTGAGNPVGDKLNVITVGPR	iTRAQ8plex@N-term; iTRAQ8plex(K)@15	missed K-L@15	2971.69	3	98.84	13	4.76931	1	2	65.4809	65.5412
855	32	sp|P04040|CATA_HUMAN	AFYVNVLNEEQR	iTRAQ8plex@N-term		1784.94	1	99	14	4.93753	0.587008	7	64.1201	64.1715
856	32	sp|P04040|CATA_HUMAN	AFYVNVLNEEQR	iTRAQ8plex@N-term; Deamidated(N)@8		1785.92	2	99	10	4.78483	0.412992	1	64.0568	64.1715
857	32	sp|P04040|CATA_HUMAN	DLFNAIATGK	iTRAQ8plex@N-term; iTRAQ8plex(K)@10		1656.97	2	99	13	4.56683	1	5	63.7461	63.7714
858	32	sp|P04040|CATA_HUMAN	DPILFPSFIHSQK	iTRAQ8plex@N-term; iTRAQ8plex(K)@13		2136.22	2	97.66	9	4.56671	1	3	64.6783	64.6696
859	32	sp|P04040|CATA_HUMAN	FSTVAGESGSADTVR	iTRAQ8plex@N-term		1786.9	1	99	16	3.96251	1	4	52.721	52.7263
860	32	sp|P04040|CATA_HUMAN	FYTEDGNWDLVGNNTPIFFIR	iTRAQ8plex@N-term		2821.4	1	99	15	4.88416	0.344416	9	82.7675	82.7877
861	32	sp|P04040|CATA_HUMAN	FYTEDGNWDLVGNNTPIFFIR	iTRAQ8plex@N-term; Deamidated(N)@14		2822.39	2	99	17	5.1637	0.655584	8	83.3612	83.3265
862	32	sp|P04040|CATA_HUMAN	FYTEDGNWDLVGNNTPIFFIRDPILFPSFIHSQK	iTRAQ8plex@N-term; Deamidated(N)@7; iTRAQ8plex(K)@34	missed R-D@21	4636.39	4	99	12	4.50648	1	2	85.3936	85.4022
863	32	sp|P04040|CATA_HUMAN	GAGAFGYFEVTHDITK	iTRAQ8plex@N-term; iTRAQ8plex(K)@16		2320.23	2	99	15	5.3013	1	9	63.9705	64.0372
864	32	sp|P04040|CATA_HUMAN	GPLLVQDVVFTDEMAHFDR	iTRAQ8plex@N-term		2492.27	1	99	18	5.09785	0.406305	26	77.2957	77.2615
865	32	sp|P04040|CATA_HUMAN	GPLLVQDVVFTDEMAHFDR	iTRAQ8plex@N-term; Deamidated(Q)@6		2493.25	2	99	18	5.26256	0.593695	1	75.5774	75.5459
866	32	sp|P04040|CATA_HUMAN	LGPNYLHIPVNCPYR	iTRAQ8plex@N-term; Methylthio(C)@12		2105.09	2	99	15	4.95895	1	12	68.0675	68.091
867	32	sp|P04040|CATA_HUMAN	NPVNYFAEVEQIAFDPSNMPPGIEASPDK	iTRAQ8plex@N-term; iTRAQ8plex(K)@29		3783.89	2	99	15	5.22758	0.933168	17	84.4369	84.5371
868	32	sp|P04040|CATA_HUMAN	NPVNYFAEVEQIAFDPSNMPPGIEASPDK	iTRAQ8plex@N-term; Deamidated(N)@4; iTRAQ8plex(K)@29		3784.88	3	99	10	4.08261	0.0668317	1	82.5003	82.5105
869	33	sp|P52790|HXK3_HUMAN	AAQLCGAGVAAVVEK	iTRAQ8plex@N-term; Methylthio(C)@5; iTRAQ8plex(K)@15		2040.13	3	99	14	5.01904	1	5	68.5778	68.6483
870	33	sp|P52790|HXK3_HUMAN	AQLQQIQASLLGSMEQALR	iTRAQ8plex@N-term		2388.31	1	99	22	5.08662	1	19	83.813	83.8182
871	33	sp|P52790|HXK3_HUMAN	ASDCEGQDVVSLLR	iTRAQ8plex@N-term; Methylthio(C)@4		1840.9	2	99	11	4.60995	1	6	65.9668	65.947
872	33	sp|P52790|HXK3_HUMAN	CSGVEGQDVVQLLR	iTRAQ8plex@N-term; Methylthio(C)@1		1851.95	2	99	13	4.39078	1	7	69.0236	69.0288
873	33	sp|P52790|HXK3_HUMAN	FLSEIESDSLALR	iTRAQ8plex@N-term		1782.97	1	99	14	5.05803	1	33	76.9529	77.099
874	33	sp|P52790|HXK3_HUMAN	GDFLALDLGGTNFR	iTRAQ8plex@N-term		1798.95	1	99	15	5.02042	0.608912	12	72.6679	72.7449
875	33	sp|P52790|HXK3_HUMAN	GDFLALDLGGTNFR	iTRAQ8plex@N-term; Deamidated(N)@12		1799.94	2	99	9	4.82814	0.391088	3	71.9751	72.0455
876	33	sp|P52790|HXK3_HUMAN	LLEETLAPFR	iTRAQ8plex@N-term		1491.86	1	99	11	4.5374	1	34	74.5775	74.5701
877	33	sp|P52790|HXK3_HUMAN	LNHDQLAAVQAQMR	iTRAQ8plex@N-term		1898.01	1	99	14	4.28957	1	7	55.4351	55.4503
878	33	sp|P52790|HXK3_HUMAN	MIGGLYLGELVR	iTRAQ8plex@N-term		1623.93	1	99	9	4.59219	1	5	73.0225	73.1023
879	33	sp|P52790|HXK3_HUMAN	QGEETLSCSEEGLPGPSDSSELVQECLQQFK	iTRAQ8plex@N-term; Methylthio(C)@8; Methylthio(C)@26; iTRAQ8plex(K)@31		4053.88	4	99	18	4.70691	0.604301	7	86.2982	86.3923
880	33	sp|P52790|HXK3_HUMAN	QGEETLSCSEEGLPGPSDSSELVQECLQQFK	iTRAQ8plex@N-term; Methylthio(C)@8; Methylthio(C)@26; Deamidated(Q)@28; iTRAQ8plex(K)@31		4054.86	5	97.77	12	4.52302	0.395699	1	87.3893	87.5286
881	33	sp|P52790|HXK3_HUMAN	QGLSGQSLPLGFTFSFPCR	iTRAQ8plex@N-term; Methylthio(C)@18		2391.2	2	99	15	4.59882	1	5	81.3714	81.3949
882	33	sp|P52790|HXK3_HUMAN	QLGLDQGILLNWTK	Gln->pyro-Glu@N-term; iTRAQ8plex(K)@14		1885.06	2	98.22	9	4.29572	0.397086	2	82.9572	82.9674
883	33	sp|P52790|HXK3_HUMAN	QLGLDQGILLNWTK	iTRAQ8plex@N-term; iTRAQ8plex(K)@14		2206.29	2	99	10	4.47709	0.602914	5	71.9816	71.9418
884	33	sp|P52790|HXK3_HUMAN	VLWVTLTGIEGHR	iTRAQ8plex@N-term		1784.03	1	99	11	4.55485	1	1	74.4973	74.5259
885	34	sp|Q01518|CAP1_HUMAN	AGAAPYVQAFDSLLAGPVAEYLK	iTRAQ8plex@N-term; iTRAQ8plex(K)@23		2958.63	2	99	18	5.74877	0.967079	38	88.8295	89.1919
886	34	sp|Q01518|CAP1_HUMAN	AGAAPYVQAFDSLLAGPVAEYLK	iTRAQ8plex@N-term; Deamidated(Q)@8; iTRAQ8plex(K)@23		2959.62	3	99	8	4.28078	0.0329213	2	90.2843	89.9276
887	34	sp|Q01518|CAP1_HUMAN	AYLSIWTELQAYIK	iTRAQ8plex@N-term; iTRAQ8plex(K)@14		2306.31	2	99	12	4.45971	1	6	87.2136	87.1916
888	34	sp|Q01518|CAP1_HUMAN	CVNTTLQIK	iTRAQ8plex@N-term; Methylthio(C)@1; iTRAQ8plex(K)@9		1672.95	3	98.08	10	4.01448	1	6	58.4773	58.4553
889	34	sp|Q01518|CAP1_HUMAN	EIGGDVQK	iTRAQ8plex@N-term; iTRAQ8plex(K)@8		1452.84	2	99	13	3.85509	1	6	46.1166	46.1663
890	34	sp|Q01518|CAP1_HUMAN	EMNDAAMFYTNR	iTRAQ8plex@N-term		1765.81	1	99	13	4.67336	1	4	59.0446	59.1053
891	34	sp|Q01518|CAP1_HUMAN	KEPAVLELEGK	iTRAQ8plex@N-term; iTRAQ8plex(K)@1; iTRAQ8plex(K)@11	missed K-E@1	2124.29	4	98.43	12	4.56038	1	5	54.8591	54.9252
892	34	sp|Q01518|CAP1_HUMAN	LSDLLAPISEQIK	iTRAQ8plex@N-term; iTRAQ8plex(K)@13		2034.22	2	99	15	6.01286	1	29	77.5563	77.6643
893	34	sp|Q01518|CAP1_HUMAN	LVTTVTEIAG	iTRAQ8plex@N-term		1306.77	1	99	10	5.22942	1	7	72.1357	72.2468
894	34	sp|Q01518|CAP1_HUMAN	NSLDCEIVSAK	iTRAQ8plex@N-term; Methylthio(C)@5; iTRAQ8plex(K)@11		1831.96	3	98.62	9	4.42436	1	1	59.6546	59.5861
895	34	sp|Q01518|CAP1_HUMAN	QVAYIYK	iTRAQ8plex@N-term; iTRAQ8plex(K)@7		1491.89	2	99	9	3.66445	1	2	52.8647	52.8966
896	34	sp|Q01518|CAP1_HUMAN	SSEMNVLIPTEGGDFNEFPVPEQFK	iTRAQ8plex@N-term; iTRAQ8plex(K)@25		3418.72	2	99	16	5.27408	0.807453	21	77.2121	77.3504
897	34	sp|Q01518|CAP1_HUMAN	SSEMNVLIPTEGGDFNEFPVPEQFK	iTRAQ8plex@N-term; Deamidated(N)@16; iTRAQ8plex(K)@25		3419.71	3	99	13	4.6515	0.192547	4	75.509	75.4763
898	34	sp|Q01518|CAP1_HUMAN	VENQENVSNLVIEDTELK	iTRAQ8plex@N-term; iTRAQ8plex(K)@18		2680.44	2	99	18	4.8854	1	10	65.9246	65.9752
899	34	sp|Q01518|CAP1_HUMAN	VPTISINK	iTRAQ8plex@N-term; iTRAQ8plex(K)@8		1478.93	2	98.24	9	4.19642	1	1	55.8004	55.7428
900	35	sp|P02751|FINC_HUMAN	CDPVDQCQDSETGTFYQIGDSWEK	iTRAQ8plex@N-term; Methylthio(C)@1; Methylthio(C)@7; iTRAQ8plex(K)@24		3450.5	4	99	13	4.70922	1	1	73.3609	73.325
901	35	sp|P02751|FINC_HUMAN	DLEVVAATPTSLLISWDAPAVTVR	iTRAQ8plex@N-term		2827.56	1	99	18	4.71378	1	3	83.2935	83.3003
902	35	sp|P02751|FINC_HUMAN	DLQFVEVTDVK	iTRAQ8plex@N-term; iTRAQ8plex(K)@11		1900.08	2	99	10	4.7752	1	4	62.8845	62.8609
903	35	sp|P02751|FINC_HUMAN	EINLAPDSSSVVVSGLMVATK	iTRAQ8plex@N-term; iTRAQ8plex(K)@21		2724.52	2	99	14	4.50852	1	5	71.3953	71.3574
904	35	sp|P02751|FINC_HUMAN	FLATTPNSLLVSWQPPR	iTRAQ8plex@N-term		2230.24	1	99	17	4.96446	0.770691	5	76.6753	76.828
905	35	sp|P02751|FINC_HUMAN	FLATTPNSLLVSWQPPR	iTRAQ8plex@N-term; Deamidated(N)@7		2231.23	2	99	13	4.438	0.229309	1	76.1591	76.1305
906	35	sp|P02751|FINC_HUMAN	FTQVTPTSLSAQWTPPNVQLTGYR	iTRAQ8plex@N-term		2995.57	1	99	16	4.81122	1	5	72.5614	72.6127
907	35	sp|P02751|FINC_HUMAN	NTFAEVTGLSPGVTYYFK	iTRAQ8plex@N-term; iTRAQ8plex(K)@18		2601.39	2	99	9	4.60323	1	5	72.2374	72.256
908	35	sp|P02751|FINC_HUMAN	SSPVVIDASTAIDAPSNLR	iTRAQ8plex@N-term		2216.2	1	99	15	4.45097	1	3	62.5944	62.5997
909	35	sp|P02751|FINC_HUMAN	VEYELSEEGDEPQYLDLPSTATSVNIPDLLPGR	iTRAQ8plex@N-term		3949.96	1	99	18	4.56521	1	4	81.6155	81.6721
910	35	sp|P02751|FINC_HUMAN	VTIMWTPPESAVTGYR	iTRAQ8plex@N-term		2111.1	1	99	8	4.29046	1	1	68.4629	68.2881
911	35	sp|P02751|FINC_HUMAN	VTWAPPPSIDLTNFLVR	iTRAQ8plex@N-term		2229.25	1	99	16	5.42914	1	14	80.6157	80.724
912	35	sp|P02751|FINC_HUMAN	VVTPLSPPTNLHLEANPDTGVLTVSWER	iTRAQ8plex@N-term		3345.79	1	99	14	4.89097	1	3	72.9141	73.0578
913	36	sp|P05107|ITB2_HUMAN	ALGFTDIVTVQVLPQCECR	iTRAQ8plex@N-term; Methylthio(C)@16; Methylthio(C)@18		2487.23	3	99	11	4.37661	1	2	83.8209	83.7898
914	36	sp|P05107|ITB2_HUMAN	DSEGCWVAYTLEQQDGMDR	iTRAQ8plex@N-term; Methylthio(C)@5		2552.09	2	99	18	4.6996	0.599993	5	74.0196	74.0365
915	36	sp|P05107|ITB2_HUMAN	DSEGCWVAYTLEQQDGMDR	iTRAQ8plex@N-term; Methylthio(C)@5; Deamidated(Q)@13		2553.08	3	99	16	4.52353	0.400007	1	74.0727	74.0365
916	36	sp|P05107|ITB2_HUMAN	ECIESGPGCTWCQK	iTRAQ8plex@N-term; Methylthio(C)@2; Methylthio(C)@9; Methylthio(C)@12; iTRAQ8plex(K)@14		2285.99	5	99	13	4.75718	1	1	67.9603	67.9739
917	36	sp|P05107|ITB2_HUMAN	GDCDGVQINVPITFQVK	iTRAQ8plex@N-term; Methylthio(C)@3; iTRAQ8plex(K)@17		2486.31	3	99	17	5.22146	1	10	72.6895	72.6998
918	36	sp|P05107|ITB2_HUMAN	GFLECGICR	iTRAQ8plex@N-term; Methylthio(C)@5; Methylthio(C)@8		1392.63	3	99	8	4.58941	1	6	71.5902	71.5373
919	36	sp|P05107|ITB2_HUMAN	GYPIDLYYLMDLSYSMLDDLR	iTRAQ8plex@N-term; Oxidation(M)@10		2875.4	2	99	12	3.6902	1	1	95.2403	95.2107
920	36	sp|P05107|ITB2_HUMAN	LLVFATDDGFHFAGDGK	iTRAQ8plex@N-term; iTRAQ8plex(K)@17		2417.28	2	98.42	8	4.56446	1	1	73.5182	73.5877
921	36	sp|P05107|ITB2_HUMAN	LTEIIPK	iTRAQ8plex@N-term; iTRAQ8plex(K)@7		1420.91	2	98.66	8	4.28567	1	2	61.3731	61.4534
922	36	sp|P05107|ITB2_HUMAN	VTATECIQEQSFVIR	iTRAQ8plex@N-term; Methylthio(C)@6		2073.05	2	99	11	4.56349	1	2	67.5775	67.5564
923	36	sp|P05107|ITB2_HUMAN	YISCAECLK	iTRAQ8plex@N-term; Methylthio(C)@4; Methylthio(C)@7; iTRAQ8plex(K)@9		1728.85	4	99	10	4.97273	1	5	69.5729	69.6417
924	36	sp|P05107|ITB2_HUMAN	YLIYVDESR	iTRAQ8plex@N-term		1460.78	1	99	10	4.14323	1	8	61.92	61.9101
925	37	sp|P04075|ALDOA_HUMAN	CPLLKPWALTFSYGR	iTRAQ8plex@N-term; Methylthio(C)@1; iTRAQ8plex(K)@5		2405.32	3	99	13	5.37842	1	24	77.2225	77.1891
926	37	sp|P04075|ALDOA_HUMAN	DGADFAK	iTRAQ8plex@N-term; iTRAQ8plex(K)@7		1330.73	2	98.51	10	3.65475	1	4	45.4593	45.4846
927	37	sp|P04075|ALDOA_HUMAN	ELSDIAHR	iTRAQ8plex@N-term		1243.68	1	99	10	3.51108	1	3	46.9827	46.9687
928	37	sp|P04075|ALDOA_HUMAN	FSHEEIAMATVTALR	iTRAQ8plex@N-term		1979.05	1	99	18	5.53393	1	14	63.0767	63.142
929	37	sp|P04075|ALDOA_HUMAN	GGVVGIK	iTRAQ8plex@N-term; iTRAQ8plex(K)@7		1236.8	2	99	10	3.68314	1	6	47.6841	47.716
930	37	sp|P04075|ALDOA_HUMAN	GILAADESTGSIAK	iTRAQ8plex@N-term; iTRAQ8plex(K)@14		1940.1	2	99	16	4.93499	1	17	56.2134	56.1748
931	37	sp|P04075|ALDOA_HUMAN	IGEHTPSALAIMENANVLAR	iTRAQ8plex@N-term		2410.29	1	99	18	5.55252	0.5782	14	68.7515	68.8497
932	37	sp|P04075|ALDOA_HUMAN	IGEHTPSALAIMENANVLAR	iTRAQ8plex@N-term; Deamidated(N)@14		2411.28	2	99	14	5.41555	0.4218	7	68.9089	68.8497
933	37	sp|P04075|ALDOA_HUMAN	QLLLTADDR	iTRAQ8plex@N-term		1347.77	1	99	10	3.94675	1	6	56.0044	56.0396
934	37	sp|P04075|ALDOA_HUMAN	TVPPAVTGITFLSGGQSEEEASINLNAINK	iTRAQ8plex@N-term; iTRAQ8plex(K)@30		3664.98	2	99	17	4.91716	0.821061	8	75.4435	75.5384
935	37	sp|P04075|ALDOA_HUMAN	TVPPAVTGITFLSGGQSEEEASINLNAINK	iTRAQ8plex@N-term; Deamidated(N)@24; iTRAQ8plex(K)@30		3665.96	3	99	11	4.25549	0.178939	2	75.0005	75.0075
936	37	sp|P04075|ALDOA_HUMAN	VLAAVYK	iTRAQ8plex@N-term; iTRAQ8plex(K)@7		1370.87	2	99	9	4.40204	1	5	58.7311	58.7664
937	37	sp|P04075|ALDOA_HUMAN	YASICQQNGIVPIVEPEILPDGDHDLK	iTRAQ8plex@N-term; Methylthio(C)@5; iTRAQ8plex(K)@27		3616.87	3	98.5	10	4.60329	0.343351	2	76.3801	76.407
938	37	sp|P04075|ALDOA_HUMAN	YASICQQNGIVPIVEPEILPDGDHDLK	iTRAQ8plex@N-term; Methylthio(C)@5; Deamidated(N)@8; iTRAQ8plex(K)@27		3617.86	4	99	14	4.88488	0.656649	12	75.6484	75.7002
939	37	sp|P04075|ALDOA_HUMAN	YASICQQNGIVPIVEPEILPDGDHDLKR	iTRAQ8plex@N-term; Methylthio(C)@5; iTRAQ8plex(K)@27	missed K-R@27	3772.97	4	99	13	5.17037	0.415161	5	71.999	72.1024
940	37	sp|P04075|ALDOA_HUMAN	YASICQQNGIVPIVEPEILPDGDHDLKR	iTRAQ8plex@N-term; Methylthio(C)@5; Deamidated(N)@8; iTRAQ8plex(K)@27	missed K-R@27	3773.96	5	99	15	5.31919	0.584839	6	73.2629	73.1947
941	38	sp|P05106|ITB3_HUMAN	CGPGWLGSQCECSEEDYRPSQQDECSPR	iTRAQ8plex@N-term; Methylthio(C)@1; Methylthio(C)@10; Methylthio(C)@12; Methylthio(C)@25		3633.38	5	97.97	10	4.41125	1	2	69.3328	69.338
942	38	sp|P05106|ITB3_HUMAN	DAPEGGFDAIMQATVCDEK	iTRAQ8plex@N-term; Methylthio(C)@16; iTRAQ8plex(K)@19		2650.25	3	99	10	4.59883	0.763538	2	73.433	73.4416
943	38	sp|P05106|ITB3_HUMAN	DAPEGGFDAIMQATVCDEK	iTRAQ8plex@N-term; Deamidated(Q)@12; Methylthio(C)@16; iTRAQ8plex(K)@19		2651.24	4	99	17	4.08976	0.236462	1	73.5326	73.5428
944	38	sp|P05106|ITB3_HUMAN	DDLWSIQNLGTK	iTRAQ8plex@N-term; iTRAQ8plex(K)@12		1997.1	2	99	11	4.39343	1	7	65.0281	64.988
945	38	sp|P05106|ITB3_HUMAN	DNCAPESIEFPVSEAR	iTRAQ8plex@N-term; Methylthio(C)@3		2112.98	2	99	18	4.65661	1	4	63.2997	63.3066
946	38	sp|P05106|ITB3_HUMAN	FQYYEDSSGK	iTRAQ8plex@N-term; iTRAQ8plex(K)@10		1830.92	2	99	11	4.11853	1	4	55.9365	56.0396
947	38	sp|P05106|ITB3_HUMAN	GVSSCQQCLAVSPMCAWCSDEALPLGSPR	iTRAQ8plex@N-term; Methylthio(C)@5; Methylthio(C)@8; Methylthio(C)@15; Methylthio(C)@18		3482.47	5	99	20	4.60688	1	12	93.5028	93.6418
948	38	sp|P05106|ITB3_HUMAN	IGDTVSFSIEAK	iTRAQ8plex@N-term; iTRAQ8plex(K)@12		1874.06	2	99	12	5.27617	1	11	62.6016	62.6789
949	38	sp|P05106|ITB3_HUMAN	IGFGAFVDKPVSPYMYISPPEALENPCYDMK	iTRAQ8plex@N-term; iTRAQ8plex(K)@9; Methylthio(C)@27; iTRAQ8plex(K)@31		4436.24	4	99	12	4.49363	1	5	80.9423	80.9029
950	38	sp|P05106|ITB3_HUMAN	NDASHLLVFTTDAK	iTRAQ8plex@N-term; iTRAQ8plex(K)@14		2139.18	2	99	13	4.54683	1	5	59.3465	59.4208
951	38	sp|P05106|ITB3_HUMAN	QVEDYPVDIYYLMDLSYSMK	Gln->pyro-Glu@N-term; iTRAQ8plex(K)@20		2758.31	2	99	12	4.08962	0.222613	2	95.0521	95.1157
952	38	sp|P05106|ITB3_HUMAN	QVEDYPVDIYYLMDLSYSMK	iTRAQ8plex@N-term; iTRAQ8plex(K)@20		3079.54	2	99	15	4.63271	0.777387	9	85.8829	85.9464
953	38	sp|P05106|ITB3_HUMAN	YCECDDFSCVR	iTRAQ8plex@N-term; Methylthio(C)@2; Methylthio(C)@4; Methylthio(C)@9		1780.64	4	99	8	4.5445	1	2	71.7521	71.7173
954	39	sp|P37837|TALDO_HUMAN	AAQASDLEK	iTRAQ8plex@N-term; iTRAQ8plex(K)@9		1539.87	2	99	12	3.55871	1	5	45.8928	45.868
955	39	sp|P37837|TALDO_HUMAN	ALAGCDFLTISPK	iTRAQ8plex@N-term; Methylthio(C)@5; iTRAQ8plex(K)@13		1989.09	3	99	15	4.74214	1	32	75.18	75.231
956	39	sp|P37837|TALDO_HUMAN	LFVLFGAEILK	iTRAQ8plex@N-term; iTRAQ8plex(K)@11		1857.16	2	99	11	4.33401	1	14	86.9127	86.9245
957	39	sp|P37837|TALDO_HUMAN	LIELYK	iTRAQ8plex@N-term; iTRAQ8plex(K)@6		1385.87	2	98.48	8	4.60176	1	5	62.0669	62.0098
958	39	sp|P37837|TALDO_HUMAN	LLGELLQDNAK	iTRAQ8plex@N-term; iTRAQ8plex(K)@11		1821.08	2	99	12	5.00507	0.74318	16	71.9343	71.834
959	39	sp|P37837|TALDO_HUMAN	LLGELLQDNAK	iTRAQ8plex@N-term; Deamidated(N)@9; iTRAQ8plex(K)@11		1822.07	3	99	10	4.54361	0.25682	4	72.7145	72.6963
960	39	sp|P37837|TALDO_HUMAN	LSFDKDAMVAR	iTRAQ8plex@N-term; iTRAQ8plex(K)@5	missed K-D@5	1860.04	3	98.34	9	4.2905	1	4	55.9763	56.0535
961	39	sp|P37837|TALDO_HUMAN	LSSTWEGIQAGK	iTRAQ8plex@N-term; iTRAQ8plex(K)@12		1884.06	2	99	13	4.93015	1	5	59.3379	59.3986
962	39	sp|P37837|TALDO_HUMAN	LVPVLSAK	iTRAQ8plex@N-term; iTRAQ8plex(K)@8		1433.94	2	99	10	3.21272	1	1	60.5088	60.4951
963	39	sp|P37837|TALDO_HUMAN	SYEPLEDPGVK	iTRAQ8plex@N-term; iTRAQ8plex(K)@11		1841	2	99	11	4.46428	1	7	53.4894	53.5013
964	39	sp|P37837|TALDO_HUMAN	TIVMGASFR	iTRAQ8plex@N-term		1284.72	1	99	8	4.43422	1	8	56.6873	56.5864
965	39	sp|P37837|TALDO_HUMAN	VSTEVDAR	iTRAQ8plex@N-term		1179.64	1	99	11	3.69055	1	2	41.8775	41.8394
966	40	sp|P00491|PNPH_HUMAN	DHINLPGFSGQNPLR	iTRAQ8plex@N-term		1968.05	1	99	12	4.55687	1	5	60.5359	60.3697
967	40	sp|P00491|PNPH_HUMAN	ELQEGTYVMVAGPSFETVAECR	iTRAQ8plex@N-term; Methylthio(C)@21		2765.3	2	99	17	4.27756	1	3	75.0058	75.055
968	40	sp|P00491|PNPH_HUMAN	FEVGDIMLIR	iTRAQ8plex@N-term		1495.84	1	99	15	4.97369	1	8	72.2207	72.256
969	40	sp|P00491|PNPH_HUMAN	FHMYEGYPLWK	iTRAQ8plex@N-term; iTRAQ8plex(K)@11		2078.09	2	97.61	10	4.52073	1	4	64.4545	64.4881
970	40	sp|P00491|PNPH_HUMAN	LEQFVSILMASIPLPDK	iTRAQ8plex@N-term; iTRAQ8plex(K)@17		2508.45	2	99	7	3.84862	1	1	98.1221	98.1089
971	40	sp|P00491|PNPH_HUMAN	LGADAVGMSTVPEVIVAR	iTRAQ8plex@N-term		2088.16	1	99	17	5.19403	1	8	68.6442	68.8048
972	40	sp|P00491|PNPH_HUMAN	LTQAQIFDYGEIPNFPR	iTRAQ8plex@N-term		2312.21	1	99	18	5.09043	1	7	74.4664	74.4817
973	40	sp|P00491|PNPH_HUMAN	LVFGFLNGR	iTRAQ8plex@N-term; Deamidated(N)@7		1326.76	2	99	10	4.50274	1	6	73.9111	73.9012
974	40	sp|P00491|PNPH_HUMAN	QAAQKLEQFVSILMASIPLPDK	Gln->pyro-Glu@N-term; iTRAQ8plex(K)@5; iTRAQ8plex(K)@22	missed K-L@5	3017.71	4	99	8	3.8284	1	2	98.0787	98.0652
975	40	sp|P00491|PNPH_HUMAN	QAAQKLEQFVSILMASIPLPDKAS	Gln->pyro-Glu@N-term; iTRAQ8plex(K)@5; iTRAQ8plex(K)@22	missed K-L@5; missed K-A@22	3175.78	5	99	10	4.27747	1	2	97.9934	98.0202
976	40	sp|P00491|PNPH_HUMAN	VFGFSLITNK	iTRAQ8plex@N-term; iTRAQ8plex(K)@10		1733.03	2	99	10	4.76675	1	5	70.5926	70.6212
977	40	sp|P00491|PNPH_HUMAN	VFHLLGVDTLVVTNAAGGLNPK	iTRAQ8plex@N-term; iTRAQ8plex(K)@22		2842.65	2	99	12	4.42825	1	2	78.4791	78.5077
978	41	sp|P68871|HBB_HUMAN	EFTPPVQAAYQK	iTRAQ8plex@N-term; iTRAQ8plex(K)@12		1986.1	2	99	14	4.75961	1	8	56.6252	56.7626
979	41	sp|P68871|HBB_HUMAN	FFESFGDLSTPDAVMGNPK	iTRAQ8plex@N-term; iTRAQ8plex(K)@19		2666.35	2	99	16	5.05693	1	19	77.6129	77.5299
980	41	sp|P68871|HBB_HUMAN	GTFATLSELHCDK	iTRAQ8plex@N-term; Methylthio(C)@11; iTRAQ8plex(K)@13		2075.06	3	99	13	4.60582	1	8	62.4027	62.418
981	41	sp|P68871|HBB_HUMAN	GTFATLSELHCDKLHVDPENFR	iTRAQ8plex@N-term; Methylthio(C)@11; iTRAQ8plex(K)@13	missed K-L@13	3182.61	4	99	12	4.88826	1	3	66.3404	66.3974
982	41	sp|P68871|HBB_HUMAN	KVLGAFSDGLAHLDNLK	iTRAQ8plex@N-term; iTRAQ8plex(K)@1; iTRAQ8plex(K)@17	missed K-V@1	2709.59	4	99	12	4.61612	1	15	69.5546	69.6058
983	41	sp|P68871|HBB_HUMAN	LHVDPENFR	iTRAQ8plex@N-term		1429.76	1	99	13	4.8992	1	12	52.3536	52.468
984	41	sp|P68871|HBB_HUMAN	LLGNVLVCVLAHHFGKEFTPPVQAAYQK	iTRAQ8plex@N-term; Methylthio(C)@8; iTRAQ8plex(K)@16; iTRAQ8plex(K)@28	missed K-E@16	4037.25	5	99	10	4.70919	1	4	83.1935	83.1799
985	41	sp|P68871|HBB_HUMAN	LLVVYPWTQR	iTRAQ8plex@N-term		1577.92	1	99	11	6.07864	1	12	71.2679	71.3949
986	41	sp|P68871|HBB_HUMAN	VLGAFSDGLAHLDNLK	iTRAQ8plex@N-term; iTRAQ8plex(K)@16		2277.29	2	99	15	5.98686	0.945003	38	77.4048	77.6197
987	41	sp|P68871|HBB_HUMAN	VLGAFSDGLAHLDNLK	iTRAQ8plex@N-term; Deamidated(N)@14; iTRAQ8plex(K)@16		2278.28	3	99	16	4.75176	0.0549966	6	77.6885	77.7088
988	41	sp|P68871|HBB_HUMAN	VNVDEVGGEALGR	iTRAQ8plex@N-term		1617.86	1	99	16	5.32294	1	11	56.1695	56.2203
989	41	sp|P68871|HBB_HUMAN	VVAGVANALAHK	iTRAQ8plex@N-term; iTRAQ8plex(K)@12		1757.08	2	99	17	5.25838	0.975212	47	64.282	64.261
990	41	sp|P68871|HBB_HUMAN	VVAGVANALAHK	iTRAQ8plex@N-term; Deamidated(N)@7; iTRAQ8plex(K)@12		1758.06	3	99	12	3.66351	0.0247877	11	52.2994	52.2589
991	41	sp|P68871|HBB_HUMAN	VVAGVANALAHKYH	iTRAQ8plex@N-term; iTRAQ8plex(K)@12	missed K-Y@12	2057.2	3	97.92	9	4.33397	1	2	64.9032	64.8444
992	42	sp|P09960|LKHA4_HUMAN	DLSSHQLNEFLAQTLQR	iTRAQ8plex@N-term		2303.22	1	99	18	5.29019	1	15	69.4173	69.4722
993	42	sp|P09960|LKHA4_HUMAN	EDDLNSFNATDLK	iTRAQ8plex@N-term; iTRAQ8plex(K)@13		2089.08	2	98.84	9	3.98	1	2	59.7123	59.6748
994	42	sp|P09960|LKHA4_HUMAN	ELVALMSAIR	iTRAQ8plex@N-term		1405.83	1	99	12	5.80584	1	14	76.3016	76.1525
995	42	sp|P09960|LKHA4_HUMAN	GSPMEISLPIALSK	iTRAQ8plex@N-term; iTRAQ8plex(K)@14		2050.2	2	99	11	4.87794	1	7	69.9199	69.8515
996	42	sp|P09960|LKHA4_HUMAN	HFNALGGWGELQNSVK	iTRAQ8plex@N-term; iTRAQ8plex(K)@16		2364.28	2	98.97	10	4.8385	1	5	62.1056	62.1812
997	42	sp|P09960|LKHA4_HUMAN	LTYTAEVSVPK	iTRAQ8plex@N-term; iTRAQ8plex(K)@11		1815.06	2	99	13	4.10374	1	8	58.24	58.2014
998	42	sp|P09960|LKHA4_HUMAN	LVVDLTDIDPDVAYSSVPYEK	iTRAQ8plex@N-term; iTRAQ8plex(K)@21		2945.57	2	99	16	4.93207	1	14	76.9563	77.0089
999	42	sp|P09960|LKHA4_HUMAN	SAYEFSETESMLK	iTRAQ8plex@N-term; iTRAQ8plex(K)@13		2129.08	2	99	14	4.8116	1	6	61.7743	61.6941
1000	42	sp|P09960|LKHA4_HUMAN	TLTGTAALTVQSQEDNLR	iTRAQ8plex@N-term		2221.19	1	99	20	4.70233	1	8	60.353	60.3192
1001	42	sp|P09960|LKHA4_HUMAN	WEDAIPLALK	iTRAQ8plex@N-term; iTRAQ8plex(K)@10		1763.04	2	99	12	4.91863	1	3	71.2237	71.2522
1002	43	sp|Q6XQN6|PNCB_HUMAN	AFQGLLDTYSVWR	iTRAQ8plex@N-term		1858.99	1	99	12	4.77187	1	8	78.1106	78.1225
1003	43	sp|Q6XQN6|PNCB_HUMAN	AQGPDGGLTASTYSYLGGFDSSSNVLAGQLR	iTRAQ8plex@N-term		3392.68	1	99	16	4.31727	1	2	75.1817	75.1429
1004	43	sp|Q6XQN6|PNCB_HUMAN	AQVWLEQVCAHLGLGVQEPHPGER	iTRAQ8plex@N-term; Methylthio(C)@9		3002.52	2	99	16	4.70232	1	4	83.5361	83.5961
1005	43	sp|Q6XQN6|PNCB_HUMAN	DAAEFELFFR	iTRAQ8plex@N-term		1547.79	1	99	11	4.76603	1	6	72.4901	72.5237
1006	43	sp|Q6XQN6|PNCB_HUMAN	DADVQFLASVLPPDTDPAFFEHLR	iTRAQ8plex@N-term		3003.53	1	99	12	4.98562	1	17	80.8083	80.8583
1007	43	sp|Q6XQN6|PNCB_HUMAN	LAQEGSEVNVIGIGTSVVTCPQQPSLGGVYK	iTRAQ8plex@N-term; Methylthio(C)@20; iTRAQ8plex(K)@31		3784	3	99	13	4.45617	0.675943	1	76.2647	76.1835
1008	43	sp|Q6XQN6|PNCB_HUMAN	LAQEGSEVNVIGIGTSVVTCPQQPSLGGVYK	iTRAQ8plex@N-term; Deamidated(N)@9; Methylthio(C)@20; iTRAQ8plex(K)@31		3784.98	4	99	12	4.13688	0.324057	1	76.0764	76.0388
1009	43	sp|Q6XQN6|PNCB_HUMAN	LCLQQGQLCEPLPSLAESR	iTRAQ8plex@N-term; Methylthio(C)@2; Methylthio(C)@9		2480.22	3	99	17	4.67914	1	3	77.3867	77.3504
1010	43	sp|Q6XQN6|PNCB_HUMAN	LDSGDLLQQAQEIR	iTRAQ8plex@N-term		1889.02	1	99	13	4.86976	1	2	64.5285	64.4598
1011	43	sp|Q6XQN6|PNCB_HUMAN	LLGSDGSPLMDMLQLAEEPVPQAGQELR	iTRAQ8plex@N-term		3297.69	1	99	20	5.45511	0.679117	7	88.963	89.1028
1012	43	sp|Q6XQN6|PNCB_HUMAN	LLGSDGSPLMDMLQLAEEPVPQAGQELR	iTRAQ8plex@N-term; Deamidated(Q)@14		3298.67	2	99	13	5.12588	0.318206	1	89.6579	89.7629
1013	43	sp|Q6XQN6|PNCB_HUMAN	LLGSDGSPLMDMLQLAEEPVPQAGQELR	iTRAQ8plex@N-term; Oxidation(M)@12		3313.68	2	99	8	3.05077	0.00267668	1	89.8403	89.8076
1014	43	sp|Q6XQN6|PNCB_HUMAN	LQALVNSLCAGQSP	iTRAQ8plex@N-term; Methylthio(C)@9		1749.91	2	99	11	4.54749	1	19	93.3092	93.464
1015	43	sp|Q6XQN6|PNCB_HUMAN	SGLPNFLAVALALGELGYR	iTRAQ8plex@N-term		2264.28	1	99	18	4.74158	1	7	93.9747	94.0871
1016	43	sp|Q6XQN6|PNCB_HUMAN	SPAQYQVVLSERLQALVNSLCAGQSP	iTRAQ8plex@N-term; Methylthio(C)@21	missed R-L@12	3107.6	3	99	8	3.86794	1	3	96.1269	96.0873
1017	44	sp|P60174|TPIS_HUMAN	DCGATWVVLGHSER	iTRAQ8plex@N-term; Methylthio(C)@2		1878.9	2	99	15	5.14513	1	7	61.737	61.7456
1018	44	sp|P60174|TPIS_HUMAN	ELASQPDVDGFLVGGASLKPEFVDIINAK	iTRAQ8plex@N-term; iTRAQ8plex(K)@19; iTRAQ8plex(K)@29		3941.19	3	99	15	5.35579	0.585556	16	78.6435	78.7905
1019	44	sp|P60174|TPIS_HUMAN	ELASQPDVDGFLVGGASLKPEFVDIINAK	iTRAQ8plex@N-term; iTRAQ8plex(K)@19; Deamidated(N)@27; iTRAQ8plex(K)@29		3942.18	4	99	14	5.20569	0.414444	16	76.7191	76.7377
1020	44	sp|P60174|TPIS_HUMAN	IAVAAQNCYK	iTRAQ8plex@N-term; Methylthio(C)@8; iTRAQ8plex(K)@10		1733.94	3	99	12	4.74173	1	4	58.831	58.7664
1021	44	sp|P60174|TPIS_HUMAN	IIYGGSVTGATCK	iTRAQ8plex@N-term; Methylthio(C)@12; iTRAQ8plex(K)@13		1923.04	3	99	16	4.91339	1	6	59.4858	59.4977
1022	44	sp|P60174|TPIS_HUMAN	KQSLGELIGTLNAAK	iTRAQ8plex@N-term; iTRAQ8plex(K)@1; iTRAQ8plex(K)@15	missed K-Q@1	2454.49	4	98.98	11	5.04869	1	3	66.3204	66.307
1023	44	sp|P60174|TPIS_HUMAN	QSLGELIGTLNAAK	Gln->pyro-Glu@N-term; iTRAQ8plex(K)@14		1700.96	2	99	12	4.79355	0.58384	2	79.7972	79.7627
1024	44	sp|P60174|TPIS_HUMAN	QSLGELIGTLNAAK	iTRAQ8plex@N-term; iTRAQ8plex(K)@14		2022.19	2	99	13	4.37271	0.221543	5	70.8961	70.8132
1025	44	sp|P60174|TPIS_HUMAN	QSLGELIGTLNAAK	iTRAQ8plex@N-term; Deamidated(N)@11; iTRAQ8plex(K)@14		2023.18	3	99	12	4.31643	0.194617	4	71.1579	71.1332
1026	44	sp|P60174|TPIS_HUMAN	VAHALAEGLGVIACIGEK	iTRAQ8plex@N-term; Methylthio(C)@14; iTRAQ8plex(K)@18		2404.34	3	99	16	5.37453	1	20	81.6272	81.707
1027	44	sp|P60174|TPIS_HUMAN	VIADNVK	iTRAQ8plex@N-term; iTRAQ8plex(K)@7		1365.84	2	99	10	3.719	1	6	48.8676	48.849
1028	44	sp|P60174|TPIS_HUMAN	VPADTEVVCAPPTAYIDFAR	iTRAQ8plex@N-term; Methylthio(C)@9		2484.23	2	99	13	5.75405	1	16	77.1188	76.9082
1029	44	sp|P60174|TPIS_HUMAN	VTNGAFTGEISPGMIK	iTRAQ8plex@N-term; Deamidated(N)@3; iTRAQ8plex(K)@16		2230.21	3	99	16	4.96087	1	17	63.2174	63.1874
1030	44	sp|P60174|TPIS_HUMAN	VVFEQTK	iTRAQ8plex@N-term; iTRAQ8plex(K)@7		1457.87	2	98.07	10	3.95794	1	6	51.3921	51.4074
1031	44	sp|P60174|TPIS_HUMAN	VVLAYEPVWAIGTGK	iTRAQ8plex@N-term; iTRAQ8plex(K)@15		2210.29	2	99	21	5.04316	1	17	74.3877	74.393
1032	45	sp|P07996|TSP1_HUMAN	AGTLDLSLTVQGK	iTRAQ8plex@N-term; iTRAQ8plex(K)@13		1910.13	2	99	12	5.0016	1	8	61.2185	61.2812
1033	45	sp|P07996|TSP1_HUMAN	DCVGDVTENQICNK	iTRAQ8plex@N-term; Methylthio(C)@2; Methylthio(C)@12; iTRAQ8plex(K)@14		2237.04	4	99	15	4.91756	1	6	61.7348	61.745
1034	45	sp|P07996|TSP1_HUMAN	FQMIPLDPK	iTRAQ8plex@N-term; iTRAQ8plex(K)@9		1695.98	2	99	10	5.01915	1	7	66.5764	66.9179
1035	45	sp|P07996|TSP1_HUMAN	FVFGTTPEDILR	iTRAQ8plex@N-term		1697.93	1	99	13	5.25375	1	11	71.0765	71.1332
1036	45	sp|P07996|TSP1_HUMAN	GFLLLASLR	iTRAQ8plex@N-term		1292.81	1	99	10	5.19807	1	10	74.5076	74.6228
1037	45	sp|P07996|TSP1_HUMAN	GGVNDNFQGVLQNVR	iTRAQ8plex@N-term		1920.01	1	99	11	4.40207	1	4	61.034	61.0443
1038	45	sp|P07996|TSP1_HUMAN	IEDANLIPPVPDDKFQDLVDAVR	iTRAQ8plex@N-term; iTRAQ8plex(K)@14	missed K-F@14	3186.74	3	99	13	4.79005	1	5	77.1507	77.1659
1039	45	sp|P07996|TSP1_HUMAN	IPESGGDNSVFDIFELTGAAR	iTRAQ8plex@N-term		2498.26	1	99	14	5.02702	0.809824	8	79.9916	80.0051
1040	45	sp|P07996|TSP1_HUMAN	IPESGGDNSVFDIFELTGAAR	iTRAQ8plex@N-term; Deamidated(N)@8		2499.24	2	99	11	4.39778	0.190176	3	81.6645	81.6814
1041	45	sp|P07996|TSP1_HUMAN	TIVTTLQDSIR	iTRAQ8plex@N-term		1549.9	1	99	15	5.45878	1	9	64.718	64.685
1042	46	sp|P05109|S10A8_HUMAN	ALNSIIDVYHK	iTRAQ8plex@N-term; iTRAQ8plex(K)@11		1880.1	2	99	16	5.97315	0.863636	32	62.9325	62.6408
1043	46	sp|P05109|S10A8_HUMAN	ALNSIIDVYHK	iTRAQ8plex@N-term; Deamidated(N)@3; iTRAQ8plex(K)@11		1881.08	3	99	14	5.17152	0.136364	56	63.6166	63.5936
1044	46	sp|P05109|S10A8_HUMAN	ELDINTDGAVNFQEFLILVIK	iTRAQ8plex@N-term; iTRAQ8plex(K)@21		2998.68	2	99	15	3.87431	0.131471	232	99.852	99.8572
1045	46	sp|P05109|S10A8_HUMAN	ELDINTDGAVNFQEFLILVIK	iTRAQ8plex@N-term; Deamidated(N)@11; iTRAQ8plex(K)@21		2999.67	3	99	13	4.69426	0.868529	27	92.3319	92.4031
1046	46	sp|P05109|S10A8_HUMAN	GADVWFK	iTRAQ8plex@N-term; iTRAQ8plex(K)@7		1429.82	2	99	12	5.85325	1	31	57.9105	57.9208
1047	46	sp|P05109|S10A8_HUMAN	GNFHAVYR	iTRAQ8plex@N-term		1266.68	1	99	13	5.21999	0.972818	12	43.0656	43.205
1048	46	sp|P05109|S10A8_HUMAN	GNFHAVYR	iTRAQ8plex@N-term; Deamidated(N)@2		1267.66	2	98.03	12	3.66624	0.0271821	12	45.0611	45.0664
1049	46	sp|P05109|S10A8_HUMAN	GNFHAVYRDDLK	iTRAQ8plex@N-term; iTRAQ8plex(K)@12	missed R-D@8	2042.12	3	98.96	12	3.96932	1	8	48.5468	48.5066
1050	46	sp|P05109|S10A8_HUMAN	KLLETECPQYIR	iTRAQ8plex@N-term; iTRAQ8plex(K)@1; Methylthio(C)@7	missed K-L@1	2146.17	4	99	14	5.97395	1	21	62.4282	62.4601
1051	46	sp|P05109|S10A8_HUMAN	LLETECPQYIR	iTRAQ8plex@N-term; Methylthio(C)@6		1713.87	2	99	16	6.34902	1	37	68.9056	69.0288
1052	46	sp|P05109|S10A8_HUMAN	MGVAAHK	iTRAQ8plex@N-term; iTRAQ8plex(K)@7		1320.78	2	98.95	11	4.94727	1	12	41.3708	41.2684
1053	46	sp|P05109|S10A8_HUMAN	MLTELEK	iTRAQ8plex@N-term; iTRAQ8plex(K)@7		1470.86	2	99	12	5.78188	0.878388	40	59.0644	59.3845
1054	46	sp|P05109|S10A8_HUMAN	MLTELEK	iTRAQ8plex@N-term; Oxidation(M)@1; iTRAQ8plex(K)@7		1486.85	3	98.34	12	4.92317	0.121612	22	52.3906	52.5134
1055	46	sp|P05109|S10A8_HUMAN	SHEESHKE	iTRAQ8plex@N-term; iTRAQ8plex(K)@7	missed K-E@7	1589.83	3	99	13	5.15284	1	1	26.4618	26.4671
1056	47	sp|P18669|PGAM1_HUMAN	ALPFWNEEIVPQIK	iTRAQ8plex@N-term; iTRAQ8plex(K)@14		2291.31	2	99	11	5.74109	0.644872	23	74.8205	74.7131
1057	47	sp|P18669|PGAM1_HUMAN	ALPFWNEEIVPQIK	iTRAQ8plex@N-term; Deamidated(N)@6; iTRAQ8plex(K)@14		2292.3	3	99	13	5.482	0.355128	6	75.1222	74.9168
1058	47	sp|P18669|PGAM1_HUMAN	DAGYEFDICFTSVQK	iTRAQ8plex@N-term; Methylthio(C)@9; iTRAQ8plex(K)@15		2376.16	3	99	14	4.78004	0.661496	5	73.4468	73.4587
1059	47	sp|P18669|PGAM1_HUMAN	DAGYEFDICFTSVQK	iTRAQ8plex@N-term; Methylthio(C)@9; Deamidated(Q)@14; iTRAQ8plex(K)@15		2377.14	4	99	12	4.48907	0.338504	2	73.5293	73.5479
1060	47	sp|P18669|PGAM1_HUMAN	FSGWYDADLSPAGHEEAK	iTRAQ8plex@N-term; iTRAQ8plex(K)@18		2587.28	2	99	11	4.03007	1	5	61.5804	61.5419
1061	47	sp|P18669|PGAM1_HUMAN	HGESAWNLENR	iTRAQ8plex@N-term		1615.8	1	99	16	3.54949	1	6	46.6998	46.6591
1062	47	sp|P18669|PGAM1_HUMAN	HLEGLSEEAIMELNLPTGIPIVYELDK	iTRAQ8plex@N-term; iTRAQ8plex(K)@27		3630.97	2	99	18	4.78968	0.821389	16	82.8277	82.833
1063	47	sp|P18669|PGAM1_HUMAN	HLEGLSEEAIMELNLPTGIPIVYELDK	iTRAQ8plex@N-term; Deamidated(N)@14; iTRAQ8plex(K)@27		3631.95	3	99	11	4.12704	0.178611	1	84.5146	84.5647
1064	47	sp|P18669|PGAM1_HUMAN	NLKPIKPMQFLGDEETVR	iTRAQ8plex@N-term; iTRAQ8plex(K)@3; iTRAQ8plex(K)@6		3026.74	3	99	13	4.80799	1	4	60.2746	60.3265
1065	47	sp|P18669|PGAM1_HUMAN	TLWTVLDAIDQMWLPVVR	iTRAQ8plex@N-term; Oxidation(M)@12		2475.35	2	99	12	4.81962	1	1	97.2063	97.2692
1066	47	sp|P18669|PGAM1_HUMAN	VLIAAHGNSLR	iTRAQ8plex@N-term		1453.87	1	99	12	3.81023	1	5	50.115	50.0878
1067	47	sp|P18669|PGAM1_HUMAN	YADLTEDQLPSCESLK	iTRAQ8plex@N-term; Methylthio(C)@12; iTRAQ8plex(K)@16		2465.23	3	99	13	5.53362	0.922637	13	68.9564	68.8746
1068	47	sp|P18669|PGAM1_HUMAN	YADLTEDQLPSCESLK	iTRAQ8plex@N-term; Deamidated(Q)@8; Methylthio(C)@12; iTRAQ8plex(K)@16		2466.21	4	99	9	4.45712	0.0773634	1	68.8476	68.8124
1069	47	sp|P18669|PGAM1_HUMAN	YADLTEDQLPSCESLKDTIAR	iTRAQ8plex@N-term; Methylthio(C)@12; iTRAQ8plex(K)@16	missed K-D@16	3021.52	4	99	13	4.76872	1	6	72.152	72.1573
1070	48	sp|P11413|G6PD_HUMAN	DGLLPENTFIVGYAR	iTRAQ8plex@N-term		1968.06	1	99	10	4.62475	1	2	69.1168	69.0949
1071	48	sp|P11413|G6PD_HUMAN	EMVQNLMVLR	iTRAQ8plex@N-term		1535.85	1	99	13	4.7635	1	5	67.3986	67.4122
1072	48	sp|P11413|G6PD_HUMAN	GGYFDEFGIIR	iTRAQ8plex@N-term		1576.82	1	99	14	5.02161	1	7	67.8499	67.9746
1073	48	sp|P11413|G6PD_HUMAN	GPTEADELMK	iTRAQ8plex@N-term; iTRAQ8plex(K)@10		1697.91	2	99	10	3.80983	1	2	52.3133	52.2869
1074	48	sp|P11413|G6PD_HUMAN	GYLDDPTVPR	iTRAQ8plex@N-term		1435.76	1	99	11	3.80353	1	6	52.6298	52.635
1075	48	sp|P11413|G6PD_HUMAN	IDHYLGK	iTRAQ8plex@N-term; iTRAQ8plex(K)@7		1452.85	2	98.26	9	3.90276	1	3	51.7635	51.744
1076	48	sp|P11413|G6PD_HUMAN	IYPTIWWLFR	iTRAQ8plex@N-term		1697.96	1	99	10	4.37912	1	6	87.4663	87.4998
1077	48	sp|P11413|G6PD_HUMAN	KIYPTIWWLFR	iTRAQ8plex@N-term; iTRAQ8plex(K)@1	missed K-I@1	2130.26	3	99	10	4.76301	1	4	76.7291	76.7594
1078	48	sp|P11413|G6PD_HUMAN	LEDFFAR	iTRAQ8plex@N-term		1200.64	1	99	8	4.72235	1	5	68.1943	68.1849
1079	48	sp|P11413|G6PD_HUMAN	VGFQYEGTYK	iTRAQ8plex@N-term; iTRAQ8plex(K)@10		1798.97	2	99	10	4.41244	1	2	55.1085	55.0355
1080	48	sp|P11413|G6PD_HUMAN	WDGVPFILR	iTRAQ8plex@N-term		1405.8	1	99	9	4.84346	1	14	72.0655	72.0126
1081	49	sp|P40926|MDHM_HUMAN	AGAGSATLSMAYAGAR	iTRAQ8plex@N-term		1757.9	1	99	16	4.37247	1	3	55.2979	55.3082
1082	49	sp|P40926|MDHM_HUMAN	ANTFVAELK	iTRAQ8plex@N-term; iTRAQ8plex(K)@9		1599.94	2	99	11	4.2489	1	2	60.3803	60.3632
1083	49	sp|P40926|MDHM_HUMAN	FVFSLVDAMNGK	iTRAQ8plex@N-term; Deamidated(N)@10; iTRAQ8plex(K)@12		1936.06	3	99	10	4.93553	1	13	76.893	76.828
1084	49	sp|P40926|MDHM_HUMAN	GCDVVVIPAGVPR	iTRAQ8plex@N-term; Methylthio(C)@2		1630.88	2	99	13	4.29119	1	6	64.9691	64.9826
1085	49	sp|P40926|MDHM_HUMAN	GYLGPEQLPDCLK	iTRAQ8plex@N-term; Methylthio(C)@11; iTRAQ8plex(K)@13		2086.11	3	99	13	4.742	1	3	67.8969	67.9171
1086	49	sp|P40926|MDHM_HUMAN	IFGVTTLDIVR	iTRAQ8plex@N-term		1536.92	1	99	9	5.10861	1	4	72.7542	72.877
1087	49	sp|P40926|MDHM_HUMAN	LTLYDIAHTPGVAADLSHIETK	iTRAQ8plex@N-term; iTRAQ8plex(K)@22		2972.64	2	99	14	4.71635	1	2	69.3745	69.3388
1088	49	sp|P40926|MDHM_HUMAN	SQETECTYFSTPLLLGK	iTRAQ8plex@N-term; Methylthio(C)@6; iTRAQ8plex(K)@17		2570.32	3	99	10	4.45361	1	3	73.1224	73.2196
1089	49	sp|P40926|MDHM_HUMAN	VAVLGASGGIGQPLSLLLK	iTRAQ8plex@N-term; iTRAQ8plex(K)@19		2400.49	2	99	11	5.08819	1	28	81.5922	81.717
1090	49	sp|P40926|MDHM_HUMAN	VDFPQDQLTALTGR	iTRAQ8plex@N-term		1864	1	99	12	4.39236	1	3	66.9706	66.8396
1091	50	sp|P80188|NGAL_HUMAN	CDYWIR	iTRAQ8plex@N-term; Methylthio(C)@1		1204.57	2	99	6	4.44489	1	5	63.7668	63.7584
1092	50	sp|P80188|NGAL_HUMAN	ELTSELK	iTRAQ8plex@N-term; iTRAQ8plex(K)@7		1426.85	2	98.58	9	4.29763	1	7	52.2695	52.3931
1093	50	sp|P80188|NGAL_HUMAN	ELTSELKENFIR	iTRAQ8plex@N-term; iTRAQ8plex(K)@7	missed K-E@7	2086.19	3	99	12	4.52394	1	6	63.319	63.3442
1094	50	sp|P80188|NGAL_HUMAN	ITLYGR	iTRAQ8plex@N-term		1025.62	1	98.75	10	4.49945	1	5	52.178	52.2885
1095	50	sp|P80188|NGAL_HUMAN	MYATIYELK	iTRAQ8plex@N-term; iTRAQ8plex(K)@9		1738.98	2	99	14	5.33346	0.882061	28	66.0132	66.0202
1096	50	sp|P80188|NGAL_HUMAN	MYATIYELK	iTRAQ8plex@N-term; Oxidation(M)@1; iTRAQ8plex(K)@9		1754.97	3	99	10	4.45962	0.117939	4	59.4069	59.4288
1097	50	sp|P80188|NGAL_HUMAN	SLGLPENHIVFPVPIDQCIDG	iTRAQ8plex@N-term; Methylthio(C)@18		2612.33	2	99	12	6.42301	0.674077	29	81.7415	81.3505
1098	50	sp|P80188|NGAL_HUMAN	SLGLPENHIVFPVPIDQCIDG	iTRAQ8plex@N-term; Deamidated(N)@7; Methylthio(C)@18		2613.31	3	99	14	6.10741	0.325923	23	83.0934	83.1019
1099	50	sp|P80188|NGAL_HUMAN	SYPGLTSYLVR	iTRAQ8plex@N-term		1558.87	1	99	16	5.45172	1	20	64.0053	63.9924
1100	50	sp|P80188|NGAL_HUMAN	TFVPGCQPGEFTLGNIK	iTRAQ8plex@N-term; Methylthio(C)@6; iTRAQ8plex(K)@17		2461.3	3	99	16	6.26487	0.898959	24	73.312	73.106
1101	50	sp|P80188|NGAL_HUMAN	TFVPGCQPGEFTLGNIK	iTRAQ8plex@N-term; Methylthio(C)@6; Deamidated(Q)@7; iTRAQ8plex(K)@17		2462.28	4	99	14	5.31563	0.101041	1	73.0113	73.106
1102	50	sp|P80188|NGAL_HUMAN	VPLQQNFQDNQFQGK	iTRAQ8plex@N-term; iTRAQ8plex(K)@15		2398.29	2	99	15	5.19091	1	11	57.7232	57.82
1103	50	sp|P80188|NGAL_HUMAN	VVSTNYNQHAMVFFK	iTRAQ8plex@N-term; iTRAQ8plex(K)@15		2392.28	2	99	15	4.59079	1	14	54.2981	54.2676
1104	50	sp|P80188|NGAL_HUMAN	WYVVGLAGNAILR	iTRAQ8plex@N-term		1735.01	1	99	15	5.22416	0.64279	38	79.6945	79.58
1105	50	sp|P80188|NGAL_HUMAN	WYVVGLAGNAILR	iTRAQ8plex@N-term; Deamidated(N)@9		1735.99	2	99	13	4.96901	0.35721	27	75.7936	75.934
1106	51	sp|P62937|PPIA_HUMAN	ALSTGEK	iTRAQ8plex@N-term; iTRAQ8plex(K)@7		1312.78	2	97.48	11	3.52556	1	6	42.5118	42.4893
1107	51	sp|P62937|PPIA_HUMAN	EGMNIVEAMER	iTRAQ8plex@N-term		1581.78	1	99	14	4.90035	1	19	63.1085	63.0969
1108	51	sp|P62937|PPIA_HUMAN	FEDENFILK	iTRAQ8plex@N-term; iTRAQ8plex(K)@9		1761.98	2	99	14	4.99107	1	8	64.0895	64.0513
1109	51	sp|P62937|PPIA_HUMAN	HTGPGILSMANAGPNTNGSQFFICTAK	iTRAQ8plex@N-term; Methylthio(C)@24; iTRAQ8plex(K)@27		3387.7	3	99	13	4.58176	0.573005	2	69.9986	69.9584
1110	51	sp|P62937|PPIA_HUMAN	HTGPGILSMANAGPNTNGSQFFICTAK	iTRAQ8plex@N-term; Deamidated(N)@17; Methylthio(C)@24; iTRAQ8plex(K)@27		3388.68	4	99	18	4.45402	0.426995	11	71.8895	71.8499
1111	51	sp|P62937|PPIA_HUMAN	IIPGFMCQGGDFTR	iTRAQ8plex@N-term; Methylthio(C)@7		1890.91	2	99	17	5.7659	0.897966	18	75.4202	75.231
1112	51	sp|P62937|PPIA_HUMAN	IIPGFMCQGGDFTR	iTRAQ8plex@N-term; Oxidation(M)@6; Methylthio(C)@7		1906.9	3	99	12	4.82138	0.102034	4	68.8778	68.903
1113	51	sp|P62937|PPIA_HUMAN	ITIADCGQLE	iTRAQ8plex@N-term; Methylthio(C)@6		1411.7	2	99	10	4.71599	1	9	71.8981	71.9233
1114	51	sp|P62937|PPIA_HUMAN	TEWLDGK	iTRAQ8plex@N-term; iTRAQ8plex(K)@7		1455.82	2	99	9	4.36981	1	22	56.9616	56.9513
1115	51	sp|P62937|PPIA_HUMAN	VKEGMNIVEAMER	iTRAQ8plex@N-term; iTRAQ8plex(K)@2	missed K-E@2	2113.15	3	99	12	5.17222	1	14	65.2781	65.3405
1116	51	sp|P62937|PPIA_HUMAN	VSFELFADK	iTRAQ8plex@N-term; iTRAQ8plex(K)@9		1662.94	2	99	13	6.01732	1	10	65.7419	65.812
1117	52	sp|P08575|CD45_HUMAN	ADTTICLK	iTRAQ8plex@N-term; Methylthio(C)@6; iTRAQ8plex(K)@8		1517.84	3	98.28	9	3.97211	1	2	56.4923	56.5209
1118	52	sp|P08575|CD45_HUMAN	ELISMIQVVK	iTRAQ8plex@N-term; iTRAQ8plex(K)@10		1767.08	2	99	12	4.75053	1	7	70.8135	70.8908
1119	52	sp|P08575|CD45_HUMAN	ETIGDFWQMIFQR	iTRAQ8plex@N-term		1974	1	99	9	4.36129	1	3	87.2456	87.2792
1120	52	sp|P08575|CD45_HUMAN	FQCGNMIFDNK	iTRAQ8plex@N-term; Methylthio(C)@3; Deamidated(N)@5; iTRAQ8plex(K)@11		1970.95	4	98.15	7	4.41536	1	1	68.522	68.5422
1121	52	sp|P08575|CD45_HUMAN	LFLAEFQSIPR	iTRAQ8plex@N-term		1623.93	1	99	13	4.55235	1	19	75.2853	75.187
1122	52	sp|P08575|CD45_HUMAN	QLMNVEPIHADILLETYK	iTRAQ8plex@N-term; iTRAQ8plex(K)@18		2734.52	2	99	10	4.66812	1	3	69.517	69.5355
1123	52	sp|P08575|CD45_HUMAN	TDFGSPGEPQIIFCR	iTRAQ8plex@N-term; Methylthio(C)@14		2015.98	2	99	9	4.71136	1	5	70.0761	70.0494
1124	52	sp|P08575|CD45_HUMAN	VELSEINGDAGSNYINASYIDGFK	iTRAQ8plex@N-term; Deamidated(N)@13; iTRAQ8plex(K)@24		3184.6	3	99	11	4.25208	1	1	72.9113	72.881
1125	52	sp|P08575|CD45_HUMAN	VIVMLTELK	iTRAQ8plex@N-term; iTRAQ8plex(K)@9		1653.04	2	99	11	4.86666	1	2	77.9464	77.932
1126	53	sp|P07195|LDHB_HUMAN	FIIPQIVK	iTRAQ8plex@N-term; iTRAQ8plex(K)@8		1565.02	2	99	10	4.93851	1	12	67.9653	67.8604
1127	53	sp|P07195|LDHB_HUMAN	GLTSVINQK	iTRAQ8plex@N-term; iTRAQ8plex(K)@9		1566.96	2	97.98	10	4.13777	1	4	54.1997	54.1761
1128	53	sp|P07195|LDHB_HUMAN	GMYGIENEVFLSLPCILNAR	iTRAQ8plex@N-term; Methylthio(C)@15		2588.31	2	99	19	5.00836	0.81542	15	91.1131	91.3028
1129	53	sp|P07195|LDHB_HUMAN	GMYGIENEVFLSLPCILNAR	iTRAQ8plex@N-term; Deamidated(N)@7; Methylthio(C)@15		2589.29	3	99	14	4.36316	0.18458	9	87.179	87.145
1130	53	sp|P07195|LDHB_HUMAN	GYTNWAIGLSVADLIESMLK	iTRAQ8plex@N-term; iTRAQ8plex(K)@20		2788.53	2	99	14	4.73595	1	3	97.8558	97.8894
1131	53	sp|P07195|LDHB_HUMAN	IVVVTAGVR	iTRAQ8plex@N-term		1216.78	1	99	10	4.7246	1	20	56.9143	56.9052
1132	53	sp|P07195|LDHB_HUMAN	MVVESAYEVIK	iTRAQ8plex@N-term; iTRAQ8plex(K)@11		1875.06	2	99	11	4.25411	1	2	65.5983	65.5578
1133	53	sp|P07195|LDHB_HUMAN	SADTLWDIQK	iTRAQ8plex@N-term; iTRAQ8plex(K)@10		1783.99	2	98.76	10	4.72953	1	5	59.6029	59.6248
1134	53	sp|P07195|LDHB_HUMAN	SLADELALVDVLEDK	iTRAQ8plex@N-term; iTRAQ8plex(K)@15		2237.26	2	99	12	5.04559	1	22	81.3702	81.2731
1135	53	sp|P07195|LDHB_HUMAN	SLADELALVDVLEDKLK	iTRAQ8plex@N-term; iTRAQ8plex(K)@15; iTRAQ8plex(K)@17	missed K-L@15	2782.65	4	99	16	5.31366	1	5	82.4428	82.4222
1136	53	sp|P07195|LDHB_HUMAN	YLMAEK	iTRAQ8plex@N-term; iTRAQ8plex(K)@6		1361.78	2	97.49	7	3.78526	1	3	52.9943	52.9824
1137	54	sp|P61158|ARP3_HUMAN	AEPEDHYFLLTEPPLNTPENR	iTRAQ8plex@N-term		2785.39	1	99	17	4.41233	1	7	64.8846	64.8444
1138	54	sp|P61158|ARP3_HUMAN	DITYFIQQLLR	iTRAQ8plex@N-term		1712.98	1	99	14	5.80269	0.883769	17	88.7784	88.8792
1139	54	sp|P61158|ARP3_HUMAN	DITYFIQQLLR	iTRAQ8plex@N-term; Deamidated(Q)@8		1713.96	2	99	14	4.92167	0.116231	2	89.654	89.6609
1140	54	sp|P61158|ARP3_HUMAN	EFSIDVGYER	iTRAQ8plex@N-term		1517.77	1	99	18	5.45073	1	13	58.9466	59.0004
1141	54	sp|P61158|ARP3_HUMAN	FMEQVIFK	iTRAQ8plex@N-term; iTRAQ8plex(K)@8		1648.95	2	99	12	4.77658	1	16	67.5612	67.6602
1142	54	sp|P61158|ARP3_HUMAN	GVDDLDFFIGDEAIEKPTYATK	iTRAQ8plex@N-term; iTRAQ8plex(K)@16; iTRAQ8plex(K)@22		3355.8	3	99	10	4.60827	1	2	70.3865	70.3043
1143	54	sp|P61158|ARP3_HUMAN	HGIVEDWDLMER	iTRAQ8plex@N-term		1802.89	1	99	14	4.79023	1	4	61.0877	61.1112
1144	54	sp|P61158|ARP3_HUMAN	LGYAGNTEPQFIIPSCIAIK	iTRAQ8plex@N-term; Methylthio(C)@16; iTRAQ8plex(K)@20		2788.51	3	99	17	4.80131	0.509746	3	79.5179	79.5247
1145	54	sp|P61158|ARP3_HUMAN	LGYAGNTEPQFIIPSCIAIK	iTRAQ8plex@N-term; Deamidated(N)@6; Methylthio(C)@16; iTRAQ8plex(K)@20		2789.5	4	99	12	4.78438	0.490254	1	80.531	80.4698
1146	54	sp|P61158|ARP3_HUMAN	LSEELSGGR	iTRAQ8plex@N-term		1250.68	1	99	9	3.91929	1	5	51.131	51.1396
1147	54	sp|P61158|ARP3_HUMAN	YSYVCPDLVK	iTRAQ8plex@N-term; Methylthio(C)@5; iTRAQ8plex(K)@10		1839.97	3	99	13	4.72176	1	3	66.4342	66.4884
1148	55	sp|P07237|PDIA1_HUMAN	EADDIVNWLK	iTRAQ8plex@N-term; iTRAQ8plex(K)@10		1810.01	2	99	8	5.0189	1	12	68.5327	68.2434
1149	55	sp|P07237|PDIA1_HUMAN	ENLLDFIK	iTRAQ8plex@N-term; iTRAQ8plex(K)@8		1598.95	2	99	9	5.20955	1	11	69.4794	69.6417
1150	55	sp|P07237|PDIA1_HUMAN	FLESGGQDGAGDDDDLEDLEEAEEPDMEEDDDQK	iTRAQ8plex@N-term; iTRAQ8plex(K)@34		4364.85	2	99	15	3.90509	1	2	70.1176	70.0774
1151	55	sp|P07237|PDIA1_HUMAN	ILEFFGLK	iTRAQ8plex@N-term; iTRAQ8plex(K)@8		1573.97	2	99	12	5.72121	1	22	82.3476	82.3362
1152	55	sp|P07237|PDIA1_HUMAN	QFLQAAEAIDDIPFGITSNSDVFSK	iTRAQ8plex@N-term; iTRAQ8plex(K)@25		3320.74	2	99	11	4.32885	0.390674	5	84.073	84.0432
1153	55	sp|P07237|PDIA1_HUMAN	QFLQAAEAIDDIPFGITSNSDVFSK	iTRAQ8plex@N-term; Deamidated(N)@19; iTRAQ8plex(K)@25		3321.72	3	99	13	4.52188	0.609326	2	84.895	84.8636
1154	55	sp|P07237|PDIA1_HUMAN	SNFAEALAAHK	iTRAQ8plex@N-term; iTRAQ8plex(K)@11		1765.99	2	99	11	3.9038	1	2	55.2764	55.2983
1155	55	sp|P07237|PDIA1_HUMAN	THILLFLPK	iTRAQ8plex@N-term; iTRAQ8plex(K)@9		1689.08	2	97.7	11	4.77879	1	3	63.4343	63.4177
1156	55	sp|P07237|PDIA1_HUMAN	TLDGFK	iTRAQ8plex@N-term; iTRAQ8plex(K)@6		1287.76	2	98.42	7	3.67311	1	3	52.0278	51.9711
1157	56	sp|P12429|ANXA3_HUMAN	ALLTLADGR	iTRAQ8plex@N-term		1232.74	1	99	7	4.10182	1	8	61.4363	61.428
1158	56	sp|P12429|ANXA3_HUMAN	DISQAYYTVYK	iTRAQ8plex@N-term; iTRAQ8plex(K)@11		1958.06	2	99	14	4.76488	1	2	58.6123	58.6749
1159	56	sp|P12429|ANXA3_HUMAN	DIVDSIK	iTRAQ8plex@N-term; iTRAQ8plex(K)@7		1396.84	2	97.57	9	4.28769	1	3	55.03	54.971
1160	56	sp|P12429|ANXA3_HUMAN	DYPDFSPSVDAEAIQK	iTRAQ8plex@N-term; iTRAQ8plex(K)@16		2389.23	2	99	14	4.44758	1	2	60.8321	60.7497
1161	56	sp|P12429|ANXA3_HUMAN	GAGTNEDALIEILTTR	iTRAQ8plex@N-term		1977.07	1	99	19	5.7382	1	8	74.5909	74.703
1162	56	sp|P12429|ANXA3_HUMAN	GIGTDEFTLNR	iTRAQ8plex@N-term		1525.8	1	99	14	4.59113	1	9	56.8544	56.9052
1163	56	sp|P12429|ANXA3_HUMAN	NTPAFLAER	iTRAQ8plex@N-term		1321.73	1	99	10	3.96204	1	5	53.205	53.2102
1164	56	sp|P12429|ANXA3_HUMAN	SEIDLLDIR	iTRAQ8plex@N-term		1376.78	1	99	11	4.64698	1	7	65.6217	65.657
1165	56	sp|P12429|ANXA3_HUMAN	SLGDDISSETSGDFR	iTRAQ8plex@N-term		1888.9	1	99	15	5.07666	1	10	58.409	58.519
1166	56	sp|P12429|ANXA3_HUMAN	WGTDEDKFTEILCLR	iTRAQ8plex@N-term; iTRAQ8plex(K)@7; Methylthio(C)@13	missed K-F@7	2479.27	4	99	11	5.11994	1	6	74.8355	74.8034
1167	57	sp|Q6UX06|OLFM4_HUMAN	ESFGGSSEIVDQLEVEIR	iTRAQ8plex@N-term		2297.17	1	99	13	4.01212	0.671126	17	75.9645	75.934
1168	57	sp|Q6UX06|OLFM4_HUMAN	ESFGGSSEIVDQLEVEIR	iTRAQ8plex@N-term; Deamidated(Q)@12		2298.15	2	99	12	3.70234	0.328874	2	73.214	73.1913
1169	57	sp|Q6UX06|OLFM4_HUMAN	EYVQLISVYEK	iTRAQ8plex@N-term; iTRAQ8plex(K)@11		1978.12	2	97.67	9	4.91597	1	8	66.1426	66.2616
1170	57	sp|Q6UX06|OLFM4_HUMAN	GFSYLYGAWGR	iTRAQ8plex@N-term		1579.81	1	99	9	5.31838	1	6	68.7924	68.8746
1171	57	sp|Q6UX06|OLFM4_HUMAN	GLYWVAPLNTDGR	iTRAQ8plex@N-term		1764.95	1	99	17	4.93722	1	11	67.2713	67.2765
1172	57	sp|Q6UX06|OLFM4_HUMAN	LDIVMHK	iTRAQ8plex@N-term; iTRAQ8plex(K)@7		1462.88	2	99	8	4.09008	1	6	56.5579	56.6772
1173	57	sp|Q6UX06|OLFM4_HUMAN	LVIQLK	iTRAQ8plex@N-term; iTRAQ8plex(K)@6		1320.9	2	99	7	4.40075	1	2	59.3509	59.3403
1174	57	sp|Q6UX06|OLFM4_HUMAN	LYNTLDDLLLYINAR	iTRAQ8plex@N-term		2113.17	1	99	13	4.53875	0.712176	8	93.2404	93.3764
1175	57	sp|Q6UX06|OLFM4_HUMAN	LYNTLDDLLLYINAR	iTRAQ8plex@N-term; Deamidated(N)@13		2114.16	2	99	14	4.14529	0.287824	4	90.4629	90.4273
1176	57	sp|Q6UX06|OLFM4_HUMAN	LYVYNDGYLLNYDLSVLQKPQ	iTRAQ8plex@N-term; iTRAQ8plex(K)@19		3125.69	2	99	11	5.00585	0.624861	6	78.8736	78.7905
1177	57	sp|Q6UX06|OLFM4_HUMAN	LYVYNDGYLLNYDLSVLQKPQ	iTRAQ8plex@N-term; Deamidated(N)@5; iTRAQ8plex(K)@19		3126.67	3	99	15	4.78425	0.375139	3	79.3267	79.3319
1178	57	sp|Q6UX06|OLFM4_HUMAN	TEEIFYYYDTNTGK	iTRAQ8plex@N-term; iTRAQ8plex(K)@14		2351.18	2	99	14	4.60506	1	5	65.89	65.9019
1179	57	sp|Q6UX06|OLFM4_HUMAN	VQSINYNPFDQK	iTRAQ8plex@N-term; iTRAQ8plex(K)@12		2060.12	2	99	11	4.48207	1	8	61.7879	61.7746
1180	58	sp|P31146|COR1A_HUMAN	AAPEASGTPSSDAVSR	iTRAQ8plex@N-term		1805.91	1	99	17	3.53122	1	1	41.7671	41.7357
1181	58	sp|P31146|COR1A_HUMAN	ADQCYEDVR	iTRAQ8plex@N-term; Methylthio(C)@4		1447.64	2	99	9	3.76343	1	5	52.222	52.2272
1182	58	sp|P31146|COR1A_HUMAN	AVFVSEGK	iTRAQ8plex@N-term; iTRAQ8plex(K)@8		1443.85	2	98.68	9	3.85727	1	6	51.0686	51.1396
1183	58	sp|P31146|COR1A_HUMAN	DAGPLLISLK	iTRAQ8plex@N-term; iTRAQ8plex(K)@10		1634.02	2	99	10	4.28587	1	3	65.0388	64.9802
1184	58	sp|P31146|COR1A_HUMAN	HLEEPLSLQELDTSSGVLLPFFDPDTNIVYLCGK	iTRAQ8plex@N-term; Methylthio(C)@32; iTRAQ8plex(K)@34		4443.28	3	99	18	4.21072	0.431956	4	92.0189	92.0241
1185	58	sp|P31146|COR1A_HUMAN	HLEEPLSLQELDTSSGVLLPFFDPDTNIVYLCGK	iTRAQ8plex@N-term; Deamidated(N)@27; Methylthio(C)@32; iTRAQ8plex(K)@34		4444.27	4	99	13	4.32966	0.568044	2	91.0306	91.1062
1186	58	sp|P31146|COR1A_HUMAN	KSDLFQEDLYPPTAGPDPALTAEEWLGGR	iTRAQ8plex@N-term; iTRAQ8plex(K)@1	missed K-S@1	3780.95	3	99	19	5.92276	1	13	78.2339	78.1542
1187	58	sp|P31146|COR1A_HUMAN	LQATVQELQK	iTRAQ8plex@N-term; iTRAQ8plex(K)@10		1765.06	2	99	10	4.33784	1	5	59.0984	59.2083
1188	58	sp|P31146|COR1A_HUMAN	SDLFQEDLYPPTAGPDPALTAEEWLGGR	iTRAQ8plex@N-term		3348.65	1	99	20	4.91204	1	7	82.6885	82.6971
1189	58	sp|P31146|COR1A_HUMAN	YFEITSEAPFLHYLSMFSSK	iTRAQ8plex@N-term; iTRAQ8plex(K)@20		3004.55	2	99	15	5.3702	1	12	85.2935	85.2271
1190	59	sp|P29350|PTN6_HUMAN	AGFWEEFESLQK	iTRAQ8plex@N-term; iTRAQ8plex(K)@12		2078.09	2	99	11	5.16874	1	7	72.0554	72.032
1191	59	sp|P29350|PTN6_HUMAN	CVPYWPEVGMQR	iTRAQ8plex@N-term; Methylthio(C)@1		1813.86	2	99	8	4.4852	1	2	69.485	69.4115
1192	59	sp|P29350|PTN6_HUMAN	DLSGLDAETLLK	iTRAQ8plex@N-term; iTRAQ8plex(K)@12		1882.09	2	99	11	4.13758	1	2	66.022	66.0958
1193	59	sp|P29350|PTN6_HUMAN	ESLSQPGDFVLSVLSDQPK	iTRAQ8plex@N-term; iTRAQ8plex(K)@19		2653.44	2	99	17	4.93595	1	10	76.8628	76.8731
1194	59	sp|P29350|PTN6_HUMAN	FATLTELVEYYTQQQGVLQDR	iTRAQ8plex@N-term		2805.45	1	99	21	4.6352	0.893238	12	92.1718	92.094
1195	59	sp|P29350|PTN6_HUMAN	FATLTELVEYYTQQQGVLQDR	iTRAQ8plex@N-term; Deamidated(Q)@13		2806.43	2	99	11	3.71265	0.106762	2	92.5517	92.538
1196	59	sp|P29350|PTN6_HUMAN	GEPWTFLVR	iTRAQ8plex@N-term		1407.78	1	99	7	4.17435	1	1	68.2998	68.2881
1197	59	sp|P29350|PTN6_HUMAN	GLDCDIDIQK	iTRAQ8plex@N-term; Methylthio(C)@4; iTRAQ8plex(K)@10		1772.93	3	99	11	4.52385	1	6	62.9413	62.9064
1198	59	sp|P29350|PTN6_HUMAN	TLQVSPLDNGDLIR	iTRAQ8plex@N-term; Deamidated(N)@9		1845.02	2	99	12	4.59345	1	1	64.1446	64.1715
1199	59	sp|P29350|PTN6_HUMAN	YTVGGLETFDSLTDLVEHFK	iTRAQ8plex@N-term; iTRAQ8plex(K)@20		2878.52	2	99	13	4.39578	1	3	84.3454	84.3125
1200	60	sp|P17213|BPI_HUMAN	FFGTFLPEVAK	iTRAQ8plex@N-term; iTRAQ8plex(K)@11		1863.08	2	99	16	5.22537	1	19	75.2866	75.2518
1201	60	sp|P17213|BPI_HUMAN	GEFYSENHHNPPPFAPPVMEFPAAHDR	iTRAQ8plex@N-term		3393.59	1	99	18	4.46969	1	3	60.7886	60.7596
1202	60	sp|P17213|BPI_HUMAN	GLDYASQQGTAALQK	iTRAQ8plex@N-term; iTRAQ8plex(K)@15		2158.18	2	99	16	4.67243	1	10	56.1241	56.1293
1203	60	sp|P17213|BPI_HUMAN	IDSVAGINYGLVAPPATTAETLDVQMK	iTRAQ8plex@N-term; iTRAQ8plex(K)@27		3381.83	2	99	16	5.15195	0.850235	4	74.7777	74.8792
1204	60	sp|P17213|BPI_HUMAN	IDSVAGINYGLVAPPATTAETLDVQMK	iTRAQ8plex@N-term; Deamidated(N)@8; iTRAQ8plex(K)@27		3382.82	3	99	10	4.39782	0.149765	3	74.4671	74.4756
1205	60	sp|P17213|BPI_HUMAN	LLLELK	iTRAQ8plex@N-term; iTRAQ8plex(K)@6		1335.9	2	99	7	4.88009	1	15	65.6781	65.4437
1206	60	sp|P17213|BPI_HUMAN	LVGELK	iTRAQ8plex@N-term; iTRAQ8plex(K)@6		1265.82	2	98.86	7	4.0269	1	5	55.2722	55.3074
1207	60	sp|P17213|BPI_HUMAN	MVYLGLSDYFFNTAGLVYQEAGVLK	iTRAQ8plex@N-term; iTRAQ8plex(K)@25		3405.81	2	99	16	4.74684	1	4	95.9815	96.0933
1208	60	sp|P17213|BPI_HUMAN	SKVGWLIQLFHK	iTRAQ8plex@N-term; iTRAQ8plex(K)@2; iTRAQ8plex(K)@12	missed K-V@2	2367.46	4	99	10	5.10421	1	2	69.8847	69.8227
1209	60	sp|P17213|BPI_HUMAN	VQLYNVVLQPHQNFLLFGADVVYK	iTRAQ8plex@N-term; iTRAQ8plex(K)@24		3411.92	2	98.83	11	4.42744	1	2	81.2578	81.2279
1210	61	sp|P08758|ANXA5_HUMAN	ALLLLCGEDD	iTRAQ8plex@N-term; Methylthio(C)@6		1410.7	2	99	12	4.98008	1	8	87.2577	87.1892
1211	61	sp|P08758|ANXA5_HUMAN	DLLDDLKSELTGK	iTRAQ8plex@N-term; iTRAQ8plex(K)@7; iTRAQ8plex(K)@13	missed K-S@7	2358.38	4	99	12	4.76977	1	2	72.7609	72.7878
1212	61	sp|P08758|ANXA5_HUMAN	DPDAGIDEAQVEQDAQALFQAGELK	iTRAQ8plex@N-term; iTRAQ8plex(K)@25		3265.66	2	99	16	4.56862	1	12	80.0147	79.9782
1213	61	sp|P08758|ANXA5_HUMAN	ETSGNLEQLLLAVVK	iTRAQ8plex@N-term; iTRAQ8plex(K)@15		2221.31	2	99	12	5.23376	1	10	81.0169	81.1271
1214	61	sp|P08758|ANXA5_HUMAN	GLGTDEESILTLLTSR	iTRAQ8plex@N-term		2008.1	1	99	12	5.0247	1	11	78.1833	78.2119
1215	61	sp|P08758|ANXA5_HUMAN	GTVTDFPGFDER	iTRAQ8plex@N-term		1643.81	1	99	9	4.21822	1	2	59.1424	59.1203
1216	61	sp|P08758|ANXA5_HUMAN	LYDAYELK	iTRAQ8plex@N-term; iTRAQ8plex(K)@8		1621.92	2	98.73	10	4.36267	1	1	61.4298	61.4584
1217	61	sp|P08758|ANXA5_HUMAN	NFATSLYSMIK	iTRAQ8plex@N-term; iTRAQ8plex(K)@11		1882.05	2	99	9	4.46153	1	4	70.8808	70.8626
1218	61	sp|P08758|ANXA5_HUMAN	SIPAYLAETLYYAMK	iTRAQ8plex@N-term; iTRAQ8plex(K)@15		2341.29	2	99	14	5.5358	1	47	87.0873	87.1009
1219	62	sp|O00299|CLIC1_HUMAN	EEFASTCPDDEEIELAYEQVAK	iTRAQ8plex@N-term; Methylthio(C)@7; iTRAQ8plex(K)@22		3169.49	3	99	15	5.56633	1	9	74.1618	74.2635
1220	62	sp|O00299|CLIC1_HUMAN	FLDGNELTLADCNLLPK	iTRAQ8plex@N-term; Methylthio(C)@12; iTRAQ8plex(K)@17		2529.34	3	99	12	5.44371	0.88578	17	81.1119	81.2168
1221	62	sp|O00299|CLIC1_HUMAN	FLDGNELTLADCNLLPK	iTRAQ8plex@N-term; Deamidated(N)@5; Methylthio(C)@12; iTRAQ8plex(K)@17		2530.33	4	99	9	4.55413	0.11422	3	82.4332	82.4
1222	62	sp|O00299|CLIC1_HUMAN	GFTIPEAFR	iTRAQ8plex@N-term		1340.74	1	99	8	4.86094	1	8	63.9652	64.0457
1223	62	sp|O00299|CLIC1_HUMAN	GVTFNVTTVDTK	iTRAQ8plex@N-term; iTRAQ8plex(K)@12		1889.07	2	99	15	3.83613	1	12	57.3291	57.2888
1224	62	sp|O00299|CLIC1_HUMAN	KFLDGNELTLADCNLLPK	iTRAQ8plex@N-term; iTRAQ8plex(K)@1; Methylthio(C)@13; iTRAQ8plex(K)@18	missed K-F@1	2961.64	5	99	12	4.66595	1	3	72.0687	72.032
1225	62	sp|O00299|CLIC1_HUMAN	LAALNPESNTAGLDIFAK	iTRAQ8plex@N-term; iTRAQ8plex(K)@18		2452.38	2	99	17	5.1501	1	32	75.2614	75.231
1226	62	sp|O00299|CLIC1_HUMAN	LFMVLWLK	iTRAQ8plex@N-term; iTRAQ8plex(K)@8		1657.03	2	99	10	5.32029	1	7	85.9973	86.121
1227	62	sp|O00299|CLIC1_HUMAN	LHIVQVVCK	iTRAQ8plex@N-term; Methylthio(C)@8; iTRAQ8plex(K)@9		1692	3	99	12	4.70275	1	7	65.4062	65.2945
1228	62	sp|O00299|CLIC1_HUMAN	VLDNYLTSPLPEEVDETSAEDEGVSQR	iTRAQ8plex@N-term		3295.59	1	99	24	5.08231	1	20	72.471	72.5655
1229	63	sp|P07737|PROF1_HUMAN	CYEMASHLR	iTRAQ8plex@N-term; Methylthio(C)@1		1458.67	2	99	14	5.60529	1	5	57.0702	57.1512
1230	63	sp|P07737|PROF1_HUMAN	DSLLQDGEFSMDLR	iTRAQ8plex@N-term		1928.95	1	99	13	4.46421	0.1016	62	70.3825	70.3162
1231	63	sp|P07737|PROF1_HUMAN	DSLLQDGEFSMDLR	iTRAQ8plex@N-term; Deamidated(Q)@5		1929.93	2	99	14	5.2064	0.561166	5	68.6164	68.4232
1232	63	sp|P07737|PROF1_HUMAN	DSLLQDGEFSMDLR	iTRAQ8plex@N-term; Oxidation(M)@11		1944.94	2	99	11	4.98524	0.337234	18	68.044	68.1537
1233	63	sp|P07737|PROF1_HUMAN	DSPSVWAAVPGK	iTRAQ8plex@N-term; iTRAQ8plex(K)@12		1821.02	2	99	19	5.0546	1	22	57.7691	57.82
1234	63	sp|P07737|PROF1_HUMAN	EGVHGGLINK	iTRAQ8plex@N-term; iTRAQ8plex(K)@10		1630.96	2	99	14	4.06303	1	6	46.1973	46.2557
1235	63	sp|P07737|PROF1_HUMAN	SSFYVNGLTLGGQK	iTRAQ8plex@N-term; Deamidated(N)@6; iTRAQ8plex(K)@14		2079.15	3	99	16	5.78101	1	45	62.6722	62.8208
1236	63	sp|P07737|PROF1_HUMAN	STGGAPTFNVTVTK	iTRAQ8plex@N-term; iTRAQ8plex(K)@14		1987.12	2	99	15	5.31435	1	27	56.1967	56.0843
1237	63	sp|P07737|PROF1_HUMAN	TFVNITPAEVGVLVGK	iTRAQ8plex@N-term; iTRAQ8plex(K)@16		2251.34	2	99	15	6.10817	0.975927	59	74.4906	74.4817
1238	63	sp|P07737|PROF1_HUMAN	TFVNITPAEVGVLVGK	iTRAQ8plex@N-term; Deamidated(N)@4; iTRAQ8plex(K)@16		2252.32	3	99	13	4.50029	0.0240733	1	74.9534	74.9653
1239	63	sp|P07737|PROF1_HUMAN	TFVNITPAEVGVLVGKDR	iTRAQ8plex@N-term; iTRAQ8plex(K)@16	missed K-D@16	2522.47	3	99	11	4.64274	1	1	69.0195	68.9592
1240	63	sp|P07737|PROF1_HUMAN	TLVLLMGK	iTRAQ8plex@N-term; iTRAQ8plex(K)@8		1481.95	2	99	13	5.3959	1	11	65.8001	65.9019
1241	64	sp|P11142|HSP7C_HUMAN	CNEIINWLDK	iTRAQ8plex@N-term; Methylthio(C)@1; iTRAQ8plex(K)@10		1901	3	99	10	4.77273	1	7	80.3907	80.3819
1242	64	sp|P11142|HSP7C_HUMAN	DAGTIAGLNVLR	iTRAQ8plex@N-term		1502.87	1	99	13	4.6131	1	8	62.3831	62.3239
1243	64	sp|P11142|HSP7C_HUMAN	FEELNADLFR	iTRAQ8plex@N-term		1556.81	1	99	13	4.99013	0.705098	25	73.0262	73.1947
1244	64	sp|P11142|HSP7C_HUMAN	FEELNADLFR	iTRAQ8plex@N-term; Deamidated(N)@5		1557.8	2	99	10	4.61155	0.294902	4	71.1033	71.0717
1245	64	sp|P11142|HSP7C_HUMAN	IINEPTAAAIAYGLDK	iTRAQ8plex@N-term; iTRAQ8plex(K)@16		2267.3	2	98.92	8	4.16779	1	3	69.8831	69.8267
1246	64	sp|P11142|HSP7C_HUMAN	LLQDFFNGK	iTRAQ8plex@N-term; Deamidated(N)@7; iTRAQ8plex(K)@9		1689.96	3	99	8	4.38362	1	21	73.7356	73.7261
1247	64	sp|P11142|HSP7C_HUMAN	MVNHFIAEFK	iTRAQ8plex@N-term; iTRAQ8plex(K)@10		1843.03	2	99	9	4.71232	1	19	67.3769	67.3667
1248	64	sp|P11142|HSP7C_HUMAN	QTQTFTTYSDNQPGVLIQVYEGER	iTRAQ8plex@N-term		3077.52	1	99	17	4.86855	1	5	67.5645	67.6149
1249	64	sp|P11142|HSP7C_HUMAN	SFYPEEVSSMVLTK	iTRAQ8plex@N-term; iTRAQ8plex(K)@14		2224.19	2	99	17	5.1048	1	8	69.4569	69.5169
1250	65	sp|P06702|S10A9_HUMAN	DLQNFLK	iTRAQ8plex@N-term; iTRAQ8plex(K)@7		1484.88	2	99	12	5.84606	0.942889	27	59.994	60.1028
1251	65	sp|P06702|S10A9_HUMAN	DLQNFLK	iTRAQ8plex@N-term; Deamidated(N)@4; iTRAQ8plex(K)@7		1485.87	3	99	12	4.62832	0.057111	28	62.2044	62.2213
1252	65	sp|P06702|S10A9_HUMAN	KDLQNFLK	iTRAQ8plex@N-term; iTRAQ8plex(K)@1; iTRAQ8plex(K)@8	missed K-D@1	1917.18	4	99	13	5.51855	1	13	55.7443	55.7579
1253	65	sp|P06702|S10A9_HUMAN	LGHPDTLNQGEFK	iTRAQ8plex@N-term; iTRAQ8plex(K)@13		2063.13	2	99	19	5.41252	0.911911	33	52.1947	52.2885
1254	65	sp|P06702|S10A9_HUMAN	LGHPDTLNQGEFK	iTRAQ8plex@N-term; Deamidated(N)@8; iTRAQ8plex(K)@13		2064.11	3	99	15	4.39749	0.0880886	11	52.4624	52.5162
1255	65	sp|P06702|S10A9_HUMAN	LTWASHEK	iTRAQ8plex@N-term; iTRAQ8plex(K)@8		1578.9	2	99	13	4.80955	1	12	51.0139	50.9359
1256	65	sp|P06702|S10A9_HUMAN	MHEGDEGPGHHHKPGLGEGTP	iTRAQ8plex@N-term; iTRAQ8plex(K)@13		2783.37	2	99	18	4.9314	1	22	41.307	41.3123
1257	65	sp|P06702|S10A9_HUMAN	NIETIINTFHQYSVK	iTRAQ8plex@N-term; iTRAQ8plex(K)@15		2414.34	2	99	24	5.24936	0.468722	30	73.1453	73.2389
1258	65	sp|P06702|S10A9_HUMAN	NIETIINTFHQYSVK	iTRAQ8plex@N-term; Deamidated(N)@7; iTRAQ8plex(K)@15		2415.33	3	99	15	5.30377	0.531278	33	71.9766	71.9869
1259	65	sp|P06702|S10A9_HUMAN	QLSFEEFIMLMAR	Gln->pyro-Glu@N-term		1596.77	1	99	19	6.522	0.522674	12	98.0383	98.0636
1260	65	sp|P06702|S10A9_HUMAN	QLSFEEFIMLMAR	iTRAQ8plex@N-term		1918	1	99	20	6.35771	0.358052	94	86.7392	86.9245
1261	65	sp|P06702|S10A9_HUMAN	QLSFEEFIMLMAR	iTRAQ8plex@N-term; Oxidation(M)@9		1933.99	2	99	18	5.88031	0.119274	32	84.5035	84.582
1262	65	sp|P06702|S10A9_HUMAN	VIEHIMEDLDTNADK	iTRAQ8plex@N-term; iTRAQ8plex(K)@15		2350.23	2	99	15	5.09747	0.429456	107	76.1485	76.1098
1263	65	sp|P06702|S10A9_HUMAN	VIEHIMEDLDTNADK	iTRAQ8plex@N-term; Deamidated(N)@12; iTRAQ8plex(K)@15		2351.21	3	99	16	5.17538	0.513836	65	77.0276	77.0851
1264	65	sp|P06702|S10A9_HUMAN	VIEHIMEDLDTNADK	iTRAQ8plex@N-term; Oxidation(M)@6; iTRAQ8plex(K)@15		2366.22	3	99	13	4.21819	0.0567079	59	73.0288	73.0424
1265	66	sp|P00488|F13A_HUMAN	AVPPNNSNAAEDDLPTVELQGVVPR	iTRAQ8plex@N-term		2905.51	1	99	10	4.13761	1	1	66.2377	66.1557
1266	66	sp|P00488|F13A_HUMAN	ETFDVTLEPLSFK	iTRAQ8plex@N-term; iTRAQ8plex(K)@13		2133.18	2	99	11	4.8211	1	2	70.9174	70.936
1267	66	sp|P00488|F13A_HUMAN	GTYIPVPIVSELQSGK	iTRAQ8plex@N-term; iTRAQ8plex(K)@16		2295.33	2	99	12	4.64438	1	7	70.2874	70.3496
1268	66	sp|P00488|F13A_HUMAN	HVYGELDVQIQR	iTRAQ8plex@N-term		1759.95	1	99	15	4.745	1	21	54.3927	54.4079
1269	66	sp|P00488|F13A_HUMAN	LALETALMYGAK	iTRAQ8plex@N-term; iTRAQ8plex(K)@12		1888.1	2	99	11	4.35641	1	4	71.284	71.3092
1270	66	sp|P00488|F13A_HUMAN	MYVAVWTPYGVLR	iTRAQ8plex@N-term		1858.01	1	99	11	4.76528	1	3	75.2958	75.2763
1271	66	sp|P00488|F13A_HUMAN	QIGGDGMMDITDTYK	iTRAQ8plex@N-term; iTRAQ8plex(K)@15		2252.13	2	99	15	4.55704	1	4	61.7566	61.7618
1272	66	sp|P00488|F13A_HUMAN	SNVDMDFEVENAVLGK	iTRAQ8plex@N-term; iTRAQ8plex(K)@16		2374.23	2	99	17	4.78868	0.699869	7	68.5721	68.6267
1273	66	sp|P00488|F13A_HUMAN	SNVDMDFEVENAVLGK	iTRAQ8plex@N-term; Deamidated(N)@11; iTRAQ8plex(K)@16		2375.21	3	99	14	4.42098	0.300131	1	64.5183	64.3943
1274	66	sp|P00488|F13A_HUMAN	STVLTIPEIIIK	iTRAQ8plex@N-term; iTRAQ8plex(K)@12		1934.23	2	99	11	4.58575	1	3	72.3111	72.3813
1275	67	sp|P02679|FIBG_HUMAN	ANQQFLVYCEIDGSGNGWTVFQK	iTRAQ8plex@N-term; Methylthio(C)@9; Deamidated(N)@16; iTRAQ8plex(K)@23		3258.59	4	99	12			3	80.606	80.5666
1276	67	sp|P02679|FIBG_HUMAN	FGSYCPTTCGIADFLSTYQTK	iTRAQ8plex@N-term; Methylthio(C)@5; Methylthio(C)@9; iTRAQ8plex(K)@21		3002.41	4	99	16	5.24014	1	9	85.5785	85.6319
1277	67	sp|P02679|FIBG_HUMAN	LTYAYFAGGDAGDAFDGFDFGDDPSDK	iTRAQ8plex@N-term; iTRAQ8plex(K)@27		3441.58	2	99	7	4.00337	1	2	78.5974	78.6126
1278	67	sp|P02679|FIBG_HUMAN	MLEEIMK	iTRAQ8plex@N-term; iTRAQ8plex(K)@7		1500.85	2	99	9	4.67561	1	9	65.2631	65.3405
1279	67	sp|P02679|FIBG_HUMAN	VAQLEAQCQEPCK	iTRAQ8plex@N-term; Methylthio(C)@8; Methylthio(C)@12; iTRAQ8plex(K)@13		2146.05	4	99	13	4.69381	1	4	66.6039	66.5337
1280	67	sp|P02679|FIBG_HUMAN	VAQLEAQCQEPCKDTVQIHDITGK	iTRAQ8plex@N-term; Methylthio(C)@8; Methylthio(C)@12; iTRAQ8plex(K)@13; iTRAQ8plex(K)@24	missed K-D@13	3657.88	6	99	12	4.77358	1	9	68.4472	68.4975
1281	67	sp|P02679|FIBG_HUMAN	VELEDWNGR	iTRAQ8plex@N-term; Deamidated(N)@7		1421.71	2	99	10	3.97539	1	1	58.807	58.7933
1282	68	sp|P07900|HS90A_HUMAN	CLELFTELAEDKENYK	iTRAQ8plex@N-term; Methylthio(C)@1; iTRAQ8plex(K)@12; iTRAQ8plex(K)@16	missed K-E@12	2902.52	5	99	11	4.69228	1	1	81.7282	81.707
1283	68	sp|P07900|HS90A_HUMAN	HLEINPDHSIIETLR	iTRAQ8plex@N-term		2090.14	1	99	13	4.89078	1	1	57.2632	57.2884
1284	68	sp|P07900|HS90A_HUMAN	HNDDEQYAWESSAGGSFTVR	iTRAQ8plex@N-term		2559.16	1	99	16	4.23251	1	7	57.0104	57.0157
1285	68	sp|P07900|HS90A_HUMAN	NPDDITNEEYGEFYK	iTRAQ8plex@N-term; iTRAQ8plex(K)@15		2441.18	2	99	14	4.63057	1	4	59.3334	59.4288
1286	68	sp|P07900|HS90A_HUMAN	YYTSASGDEMVSLK	iTRAQ8plex@N-term; iTRAQ8plex(K)@14		2158.11	2	99	11	4.1119	1	1	59.1426	59.1053
1287	69	sp|P08567|PLEK_HUMAN	AIQMASR	iTRAQ8plex@N-term		1079.61	1	99	11	3.59472	1	5	44.137	44.1422
1288	69	sp|P08567|PLEK_HUMAN	EDPAYLHYYDPAGAEDPLGAIHLR	iTRAQ8plex@N-term		2986.48	1	99	15	5.23528	1	6	66.6421	66.6994
1289	69	sp|P08567|PLEK_HUMAN	GCVVTSVESNSNGR	iTRAQ8plex@N-term; Methylthio(C)@2; Deamidated(N)@12		1758.82	3	99	15	3.98713	1	5	53.7058	53.6195
1290	69	sp|P08567|PLEK_HUMAN	GMIPLK	iTRAQ8plex@N-term; iTRAQ8plex(K)@6		1265.8	2	97.84	6	4.0167	1	6	54.1897	54.2676
1291	69	sp|P08567|PLEK_HUMAN	GSTLTSPCQDFGK	iTRAQ8plex@N-term; Methylthio(C)@8; iTRAQ8plex(K)@13		1994.01	3	99	10	4.25103	1	6	61.2552	61.2921
1292	69	sp|P08567|PLEK_HUMAN	KSEEENLFEIITADEVHYFLQAATPK	iTRAQ8plex@N-term; iTRAQ8plex(K)@1; iTRAQ8plex(K)@26	missed K-S@1	3934.11	4	99	12	4.92057	1	1	84.5477	84.5996
1293	69	sp|P08567|PLEK_HUMAN	MFVFK	iTRAQ8plex@N-term; iTRAQ8plex(K)@5		1278.76	2	98.74	6	4.59337	1	5	61.8683	61.9036
1294	69	sp|P08567|PLEK_HUMAN	QQDHFFQAAFLEER	Gln->pyro-Glu@N-term		1747.8	1	99	18	4.93295	0.385126	6	69.3778	69.3388
1295	69	sp|P08567|PLEK_HUMAN	QQDHFFQAAFLEER	iTRAQ8plex@N-term		2069.03	1	99	17	5.13613	0.614874	8	62.2192	62.2361
1296	69	sp|P08567|PLEK_HUMAN	SEEENLFEIITADEVHYFLQAATPK	iTRAQ8plex@N-term; iTRAQ8plex(K)@25		3501.81	2	99	21	4.41265	1	9	90.1101	90.1603
1297	70	sp|P52566|GDIR2_HUMAN	APEPHVEEDDDDELDSK	iTRAQ8plex@N-term; iTRAQ8plex(K)@17		2547.21	2	99	13	4.48935	1	6	49.5053	49.5561
1298	70	sp|P52566|GDIR2_HUMAN	APNVVVTR	iTRAQ8plex@N-term		1158.7	1	99	10	3.98538	1	6	45.0156	45.065
1299	70	sp|P52566|GDIR2_HUMAN	ATFMVGSYGPRPEEYEFLTPVEEAPK	iTRAQ8plex@N-term; iTRAQ8plex(K)@26		3551.81	2	99	13	6.03793	0.862181	13	69.2742	69.326
1300	70	sp|P52566|GDIR2_HUMAN	ATFMVGSYGPRPEEYEFLTPVEEAPK	iTRAQ8plex@N-term; Oxidation(M)@4; iTRAQ8plex(K)@26		3567.81	3	98.42	13	5.24164	0.137819	7	67.0179	67.0751
1301	70	sp|P52566|GDIR2_HUMAN	LTLVCESAPGPITMDLTGDLEALK	iTRAQ8plex@N-term; Methylthio(C)@5; iTRAQ8plex(K)@24		3140.66	3	99	19	5.16366	0.894907	29	90.1982	90.4273
1302	70	sp|P52566|GDIR2_HUMAN	LTLVCESAPGPITMDLTGDLEALK	iTRAQ8plex@N-term; Methylthio(C)@5; Oxidation(M)@14; iTRAQ8plex(K)@24		3156.66	4	99	11	4.23345	0.105093	2	88.7682	88.7834
1303	70	sp|P52566|GDIR2_HUMAN	LTLVCESAPGPITMDLTGDLEALKK	iTRAQ8plex@N-term; Methylthio(C)@5; iTRAQ8plex(K)@24; iTRAQ8plex(K)@25	missed K-K@24	3572.96	5	99	14	5.09074	1	26	84.4419	84.4922
1304	70	sp|P52566|GDIR2_HUMAN	SFFTDDDKQDHLSWEWNLSIK	iTRAQ8plex@N-term; iTRAQ8plex(K)@8; iTRAQ8plex(K)@21	missed K-Q@8	3522.82	4	99	13	5.45188	1	7	68.7768	68.7837
1305	70	sp|P52566|GDIR2_HUMAN	TLLGDGPVVTDPK	iTRAQ8plex@N-term; iTRAQ8plex(K)@13		1919.12	2	98.13	11	4.47355	1	2	57.9783	57.9497
1306	71	sp|P63104|1433Z_HUMAN	DICNDVLSLLEK	iTRAQ8plex@N-term; Methylthio(C)@3; iTRAQ8plex(K)@12		2015.09	3	99	15	4.57068	0.410452	38	86.7648	86.7918
1307	71	sp|P63104|1433Z_HUMAN	DICNDVLSLLEK	iTRAQ8plex@N-term; Methylthio(C)@3; Deamidated(N)@4; iTRAQ8plex(K)@12		2016.07	4	99	17	4.72794	0.589548	29	80.0633	80.0685
1308	71	sp|P63104|1433Z_HUMAN	DSTLIMQLLR	iTRAQ8plex@N-term		1492.86	1	99	15	5.68658	1	24	75.0888	75.187
1309	71	sp|P63104|1433Z_HUMAN	FLIPNASQAESK	iTRAQ8plex@N-term; iTRAQ8plex(K)@12		1912.09	2	99	12	4.75906	1	4	58.5683	58.5386
1310	71	sp|P63104|1433Z_HUMAN	GIVDQSQQAYQEAFEISK	iTRAQ8plex@N-term; iTRAQ8plex(K)@18		2648.39	2	99	19	5.44321	1	8	66.7304	66.7823
1311	71	sp|P63104|1433Z_HUMAN	NLLSVAYK	iTRAQ8plex@N-term; iTRAQ8plex(K)@8		1514.93	2	98.33	11	4.34731	1	1	57.8431	57.8275
1312	71	sp|P63104|1433Z_HUMAN	SVTEQGAELSNEER	iTRAQ8plex@N-term		1851.91	1	99	19	4.27795	1	6	47.7482	47.7991
1313	71	sp|P63104|1433Z_HUMAN	TAFDEAIAELDTLSEESYK	iTRAQ8plex@N-term; iTRAQ8plex(K)@19		2739.4	2	99	13	5.76575	1	17	82.9904	83.1019
1314	72	sp|P22894|MMP8_HUMAN	CGVPDSGGFMLTPGNPK	iTRAQ8plex@N-term; Methylthio(C)@1; iTRAQ8plex(K)@17		2330.17	3	99	10	4.4768	1	2	65.5847	65.6116
1315	72	sp|P22894|MMP8_HUMAN	DAFELWSVASPLIFTR	iTRAQ8plex@N-term		2155.16	1	99	19	5.34771	1	6	85.788	85.8566
1316	72	sp|P22894|MMP8_HUMAN	DISNYGFPSSVQAIDAAVFYR	iTRAQ8plex@N-term		2623.32	1	99	10	4.29502	1	3	80.0583	80.0233
1317	72	sp|P22894|MMP8_HUMAN	GNQYWALSGYDILQGYPK	iTRAQ8plex@N-term; iTRAQ8plex(K)@18		2680.41	2	99	11	5.00619	1	1	72.7179	72.9216
1318	72	sp|P22894|MMP8_HUMAN	NYTPQLSEAEVER	iTRAQ8plex@N-term		1838.93	1	98.09	10	4.31641	1	1	54.0737	54.1351
1319	72	sp|P22894|MMP8_HUMAN	QFMEPGYPK	iTRAQ8plex@N-term; iTRAQ8plex(K)@9		1703.92	2	99	8	4.12668	1	2	54.2898	54.1761
1320	72	sp|P22894|MMP8_HUMAN	VDAVFQQEHFFHVFSGPR	iTRAQ8plex@N-term		2450.24	1	99	10	4.7742	1	3	67.2705	67.3008
1321	72	sp|P22894|MMP8_HUMAN	YYAFDLIAQR	iTRAQ8plex@N-term		1562.84	1	99	13	5.01815	1	31	68.3214	68.4681
1322	73	sp|P36873|PP1G_HUMAN	AHQVVEDGYEFFAK	iTRAQ8plex@N-term; iTRAQ8plex(K)@14		2247.18	2	99	13	4.91019	1	5	62.5766	62.6035
1323	73	sp|P36873|PP1G_HUMAN	EIFLSQPILLELEAPLK	iTRAQ8plex@N-term; iTRAQ8plex(K)@17		2560.53	2	99	12	4.94828	1	20	84.9888	85.092
1324	73	sp|P36873|PP1G_HUMAN	ICGDIHGQYYDLLR	iTRAQ8plex@N-term; Methylthio(C)@2		2014.99	2	99	7	4.45809	1	1	68.6701	68.6483
1325	73	sp|P36873|PP1G_HUMAN	IFCCHGGLSPDLQSMEQIR	iTRAQ8plex@N-term; Methylthio(C)@3; Methylthio(C)@4		2529.16	3	99	16	4.46512	1	2	72.5497	72.5683
1326	73	sp|P36873|PP1G_HUMAN	IKYPENFFLLR	iTRAQ8plex@N-term; iTRAQ8plex(K)@2	missed K-Y@2	2047.21	3	99	10	4.5869	1	2	67.9636	67.9517
1327	73	sp|P36873|PP1G_HUMAN	LFEYGGFPPESNYLFLGDYVDR	iTRAQ8plex@N-term		2901.42	1	99	9	4.06348	1	1	84.9483	84.9086
1328	73	sp|P36873|PP1G_HUMAN	QSLETICLLLAYK	Gln->pyro-Glu@N-term; Methylthio(C)@7; iTRAQ8plex(K)@13		1826.98	3	99	13	4.50017	0.685141	3	97.441	97.4086
1329	73	sp|P36873|PP1G_HUMAN	QSLETICLLLAYK	iTRAQ8plex@N-term; Methylthio(C)@7; iTRAQ8plex(K)@13		2148.21	3	99	11	4.1625	0.314859	4	86.0525	86.0761
1330	73	sp|P36873|PP1G_HUMAN	TFTDCFNCLPIAAIVDEK	iTRAQ8plex@N-term; Methylthio(C)@5; Methylthio(C)@8; iTRAQ8plex(K)@18		2699.33	4	99	13	4.61112	1	8	91.9487	91.9185
1331	74	sp|Q14764|MVP_HUMAN	AQALAIETEAELQR	iTRAQ8plex@N-term		1846.01	1	99	11	4.66801	1	3	65.1478	65.0786
1332	74	sp|Q14764|MVP_HUMAN	AQLELEVSK	iTRAQ8plex@N-term; iTRAQ8plex(K)@9		1623.97	2	99	11	3.9578	1	4	55.2967	55.3136
1333	74	sp|Q14764|MVP_HUMAN	ELPPGVEELLNK	iTRAQ8plex@N-term; iTRAQ8plex(K)@12		1945.13	2	99	13	4.69208	1	6	69.9315	69.9132
1334	74	sp|Q14764|MVP_HUMAN	LAQDPFPLYPGEVLEK	iTRAQ8plex@N-term; iTRAQ8plex(K)@16		2423.36	2	99	17	4.32391	1	5	74.0711	74.0365
1335	74	sp|Q14764|MVP_HUMAN	LFSVPDFVGDACK	iTRAQ8plex@N-term; Methylthio(C)@12; iTRAQ8plex(K)@13		2051.07	3	99	11	4.98252	1	7	79.1675	79.1961
1336	74	sp|Q14764|MVP_HUMAN	SFFLQPGEQLEQGIQDVYVLSEQQGLLLR	iTRAQ8plex@N-term		3637.93	1	99	16	3.92834	1	5	95.29	95.2504
1337	74	sp|Q14764|MVP_HUMAN	STLITDGSTPINLFNTAFGLLGMGPEGQPLGR	iTRAQ8plex@N-term		3577.88	1	99	16	3.66577	1	2	96.1193	96.09
1338	74	sp|Q14764|MVP_HUMAN	VVAGDEWLFEGPGTYIPR	iTRAQ8plex@N-term		2309.2	1	99	16	4.74189	1	1	75.9077	75.8811
1339	75	sp|P27105|STOM_HUMAN	AMAAEAEASR	iTRAQ8plex@N-term		1309.66	1	99	13	3.6288	1	2	45.2358	45.1968
1340	75	sp|P27105|STOM_HUMAN	EASMVITESPAALQLR	iTRAQ8plex@N-term		2019.1	1	99	15	4.50821	1	6	65.6517	65.657
1341	75	sp|P27105|STOM_HUMAN	GPGLFFILPCTDSFIK	iTRAQ8plex@N-term; Methylthio(C)@10; iTRAQ8plex(K)@16		2408.31	3	99	13	5.62806	1	36	88.3274	88.5212
1342	75	sp|P27105|STOM_HUMAN	NLSQILSDREEIAHNMQSTLDDATDAWGIK	iTRAQ8plex@N-term; iTRAQ8plex(K)@30	missed R-E@9	3979.02	3	99	13	4.62245	1	5	78.0073	77.9715
1343	75	sp|P27105|STOM_HUMAN	NSTIVFPLPIDMLQGIIGAK	iTRAQ8plex@N-term; iTRAQ8plex(K)@20		2734.59	2	99	15	4.89581	0.537297	20	91.2438	91.4798
1344	75	sp|P27105|STOM_HUMAN	NSTIVFPLPIDMLQGIIGAK	iTRAQ8plex@N-term; Deamidated(N)@1; iTRAQ8plex(K)@20		2735.58	3	99	13	4.8309	0.462703	25	93.7062	93.508
1345	75	sp|P27105|STOM_HUMAN	TISFDIPPQEILTK	iTRAQ8plex@N-term; iTRAQ8plex(K)@14		2209.28	2	99	10	4.46094	1	5	69.0622	69.0907
1346	75	sp|P27105|STOM_HUMAN	VIAAEGEMNASR	iTRAQ8plex@N-term		1550.8	1	99	16	4.41306	1	6	54.3317	54.3956
1347	75	sp|P27105|STOM_HUMAN	VQNATLAVANITNADSATR	iTRAQ8plex@N-term		2233.2	1	98.67	12	4.39471	1	2	63.1544	63.0719
1348	76	sp|Q99536|VAT1_HUMAN	ACGLNFADLMAR	iTRAQ8plex@N-term; Methylthio(C)@2		1630.79	2	99	12	4.9829	1	12	75.6334	75.7581
1349	76	sp|Q99536|VAT1_HUMAN	CLVLTGFGGYDK	iTRAQ8plex@N-term; Methylthio(C)@1; iTRAQ8plex(K)@12		1926.02	3	99	8	4.74475	1	2	72.7162	72.6983
1350	76	sp|Q99536|VAT1_HUMAN	GVDIVMDPLGGSDTAK	iTRAQ8plex@N-term; iTRAQ8plex(K)@16		2182.18	2	99	14	4.53845	1	2	64.1124	64.0808
1351	76	sp|Q99536|VAT1_HUMAN	LPPLPVTPGMEGAGVVIAVGEGVSDR	iTRAQ8plex@N-term		2820.54	1	99	16	4.58205	1	4	80.197	80.2491
1352	76	sp|Q99536|VAT1_HUMAN	TVENVTVFGTASASK	iTRAQ8plex@N-term; iTRAQ8plex(K)@15		2118.18	2	99	15	4.41717	1	7	58.0082	57.9695
1353	76	sp|Q99536|VAT1_HUMAN	TWWNQFSVTALQLLQANR	iTRAQ8plex@N-term		2479.33	1	99	19	5.20026	1	5	88.0166	88.0807
1354	76	sp|Q99536|VAT1_HUMAN	VVTYGMANLLTGPK	iTRAQ8plex@N-term; iTRAQ8plex(K)@14		2071.2	2	99	13	4.32799	1	3	68.5732	68.5506
1355	77	sp|O15144|ARPC2_HUMAN	DNTINLIHTFR	iTRAQ8plex@N-term		1646.9	1	99	14	4.90688	1	4	57.809	57.9189
1356	77	sp|O15144|ARPC2_HUMAN	DTDAAVGDNIGYITFVLFPR	iTRAQ8plex@N-term		2487.3	1	99	10	4.2399	1	3	86.2909	86.4428
1357	77	sp|O15144|ARPC2_HUMAN	IIEETLALK	iTRAQ8plex@N-term; iTRAQ8plex(K)@9		1637.02	2	99	9	4.90254	1	22	69.0681	69.326
1358	77	sp|O15144|ARPC2_HUMAN	NCFASVFEK	iTRAQ8plex@N-term; Methylthio(C)@2; iTRAQ8plex(K)@9		1697.87	3	99	12	4.67946	0.688243	4	66.136	66.1226
1359	77	sp|O15144|ARPC2_HUMAN	NCFASVFEK	iTRAQ8plex@N-term; Deamidated(N)@1; Methylthio(C)@2; iTRAQ8plex(K)@9		1698.86	4	99	8	4.33554	0.311757	1	68.7248	68.7601
1360	77	sp|O15144|ARPC2_HUMAN	VFMQEFK	iTRAQ8plex@N-term; iTRAQ8plex(K)@7		1535.86	2	98.79	9	4.24147	1	2	62.7873	62.7759
1361	77	sp|O15144|ARPC2_HUMAN	VMVSISLK	iTRAQ8plex@N-term; iTRAQ8plex(K)@8		1483.93	2	99	13	4.79357	1	6	60.9225	60.9311
1362	78	sp|P30044|PRDX5_HUMAN	ALNVEPDGTGLTCSLAPNIISQL	iTRAQ8plex@N-term; Methylthio(C)@13		2675.38	2	99	8	4.25382	1	1	89.1065	89.0765
1363	78	sp|P30044|PRDX5_HUMAN	ETDLLLDDSLVSIFGNR	iTRAQ8plex@N-term		2210.17	1	99	18	5.10166	1	7	83.5344	83.5961
1364	78	sp|P30044|PRDX5_HUMAN	FSMVVQDGIVK	iTRAQ8plex@N-term; iTRAQ8plex(K)@11		1830.05	2	99	13	4.65267	1	8	65.1014	65.1233
1365	78	sp|P30044|PRDX5_HUMAN	GVLFGVPGAFTPGCSK	iTRAQ8plex@N-term; Methylthio(C)@14; iTRAQ8plex(K)@16		2190.18	3	99	11	4.67145	1	6	70.844	70.8626
1366	78	sp|P30044|PRDX5_HUMAN	LLADPTGAFGK	iTRAQ8plex@N-term; iTRAQ8plex(K)@11		1697	2	99	10	4.23449	1	3	63.2481	63.3237
1367	78	sp|P30044|PRDX5_HUMAN	THLPGFVEQAEALK	iTRAQ8plex@N-term; iTRAQ8plex(K)@14		2147.22	2	98.72	11	5.51759	1	1	61.6991	61.4063
1368	78	sp|P30044|PRDX5_HUMAN	VGDAIPAVEVFEGEPGNK	iTRAQ8plex@N-term; iTRAQ8plex(K)@18		2435.32	2	99	14	4.83493	1	5	68.1436	68.1522
1369	78	sp|P30044|PRDX5_HUMAN	VNLAELFK	iTRAQ8plex@N-term; iTRAQ8plex(K)@8		1540.94	2	99	12	4.81749	1	14	69.1285	69.236
1370	79	sp|Q86UX7|URP2_HUMAN	ASFSQPLFQAVAAICR	iTRAQ8plex@N-term; Methylthio(C)@15		2058.07	2	99	16	4.73575	0.542017	6	90.0418	89.8918
1371	79	sp|Q86UX7|URP2_HUMAN	ASFSQPLFQAVAAICR	iTRAQ8plex@N-term; Deamidated(Q)@9; Methylthio(C)@15		2059.05	3	99	10	4.66259	0.457983	1	90.5782	90.7352
1372	79	sp|Q86UX7|URP2_HUMAN	GEELDEDLFLQLTGGHEAF	iTRAQ8plex@N-term		2423.18	1	99	19	5.29446	1	7	82.0927	82.1563
1373	79	sp|Q86UX7|URP2_HUMAN	ILEAHQNVAQLSLAEAQLR	iTRAQ8plex@N-term		2407.35	1	99	13	4.34351	1	2	65.5917	65.5578
1374	79	sp|Q86UX7|URP2_HUMAN	LEGSAPTDVLDSLTTIPELK	iTRAQ8plex@N-term; iTRAQ8plex(K)@20		2706.52	2	99	13	4.20626	1	1	79.3446	79.3565
1375	79	sp|Q86UX7|URP2_HUMAN	LLVPSPEGMSEIYLR	iTRAQ8plex@N-term		2007.1	1	99	11	4.73402	1	8	72.4874	72.5972
1376	79	sp|Q86UX7|URP2_HUMAN	QWNVNWDIR	iTRAQ8plex@N-term		1533.8	1	99	12	4.57792	1	4	63.0822	63.0719
1377	79	sp|Q86UX7|URP2_HUMAN	YYSFFDLDPK	iTRAQ8plex@N-term; iTRAQ8plex(K)@10		1902	2	99	8	4.95079	1	6	71.1046	71.1782
1378	80	sp|P50395|GDIB_HUMAN	EIRPALELLEPIEQK	iTRAQ8plex@N-term; iTRAQ8plex(K)@15		2385.41	2	99	11	4.80845	1	4	67.9265	67.9517
1379	80	sp|P50395|GDIB_HUMAN	FVSISDLLVPK	iTRAQ8plex@N-term; iTRAQ8plex(K)@11		1825.12	2	99	10	5.02555	1	7	75.1369	75.2069
1380	80	sp|P50395|GDIB_HUMAN	IYKVPSTEAEALASSLMGLFEK	iTRAQ8plex@N-term; iTRAQ8plex(K)@3; iTRAQ8plex(K)@22	missed K-V@3	3295.85	4	98.67	9	4.3357	1	2	89.5797	89.6016
1381	80	sp|P50395|GDIB_HUMAN	MTGSEFDFEEMK	iTRAQ8plex@N-term; iTRAQ8plex(K)@12		2057.99	2	99	11	4.43846	1	2	64.1796	64.1982
1382	80	sp|P50395|GDIB_HUMAN	NPYYGGESASITPLEDLYK	iTRAQ8plex@N-term; iTRAQ8plex(K)@19		2724.41	2	99	15	4.58993	1	4	68.5754	68.5381
1383	80	sp|P50395|GDIB_HUMAN	SPYLYPLYGLGELPQGFAR	iTRAQ8plex@N-term		2444.3	1	99	20	5.46305	1	11	80.8107	80.957
1384	80	sp|P50395|GDIB_HUMAN	VPSTEAEALASSLMGLFEK	iTRAQ8plex@N-term; iTRAQ8plex(K)@19		2587.4	2	99	11	5.01319	1	30	89.8359	90.0254
1385	81	sp|P60660|MYL6_HUMAN	ALGQNPTNAEVLK	iTRAQ8plex@N-term; iTRAQ8plex(K)@13		1962.14	2	99	12	3.84023	1	2	54.1722	54.1351
1386	81	sp|P60660|MYL6_HUMAN	DQGTYEDYVEGLR	iTRAQ8plex@N-term		1847.88	1	99	12	4.6574	1	6	59.7501	59.7191
1387	81	sp|P60660|MYL6_HUMAN	EAFQLFDR	iTRAQ8plex@N-term		1328.7	1	99	10	4.69021	1	7	63.5309	63.5216
1388	81	sp|P60660|MYL6_HUMAN	HVLVTLGEK	iTRAQ8plex@N-term; iTRAQ8plex(K)@9		1602.99	2	99	11	3.95192	1	6	52.2811	52.303
1389	81	sp|P60660|MYL6_HUMAN	ILYSQCGDVMR	iTRAQ8plex@N-term; Methylthio(C)@6		1633.79	2	99	13	4.8079	1	10	67.3029	67.1567
1390	81	sp|P60660|MYL6_HUMAN	NKDQGTYEDYVEGLR	iTRAQ8plex@N-term; iTRAQ8plex(K)@2	missed K-D@2	2394.23	3	99	10	4.26972	1	9	55.2568	55.262
1391	81	sp|P60660|MYL6_HUMAN	VLDFEHFLPMLQTVAK	iTRAQ8plex@N-term; iTRAQ8plex(K)@16		2495.41	2	99	8	4.50263	1	5	82.058	82.1752
1392	82	sp|P02671|FIBA_HUMAN	ALTDMPQMR	iTRAQ8plex@N-term		1365.71	1	99	9	4.04984	1	8	55.8421	55.7808
1393	82	sp|P02671|FIBA_HUMAN	DSDWPFCSDEDWNYK	iTRAQ8plex@N-term; Methylthio(C)@7; iTRAQ8plex(K)@15		2560.11	3	99	11	4.7143	1	30	73.6284	73.5479
1394	82	sp|P02671|FIBA_HUMAN	DSHSLTTNIMEILR	iTRAQ8plex@N-term		1933.02	1	99	17	5.52345	1	25	68.8244	68.8944
1395	82	sp|P02671|FIBA_HUMAN	GLIDEVNQDFTNR	iTRAQ8plex@N-term		1823.93	1	99	14	5.48973	1	10	64.3774	64.4837
1396	82	sp|P02671|FIBA_HUMAN	LEVDIDIK	iTRAQ8plex@N-term; iTRAQ8plex(K)@8		1551.93	2	99	10	4.42731	1	4	61.9588	61.9941
1397	82	sp|P02671|FIBA_HUMAN	VQHIQLLQK	iTRAQ8plex@N-term; iTRAQ8plex(K)@9		1714.07	2	99	11	3.80963	1	10	53.6043	53.6195
1398	83	sp|P20160|CAP7_HUMAN	CQVAGWGSQR	iTRAQ8plex@N-term; Methylthio(C)@1		1440.69	2	99	9	4.26416	1	10	56.489	56.4323
1399	83	sp|P20160|CAP7_HUMAN	FVMTAASCFQSQNPGVSTVVLGAYDLR	iTRAQ8plex@N-term; Methylthio(C)@8		3210.58	2	99	14	4.58659	1	8	86.0243	85.9464
1400	83	sp|P20160|CAP7_HUMAN	GGICNGDGGTPLVCEGLAHGVASFSLGPCGR	iTRAQ8plex@N-term; Methylthio(C)@4; Deamidated(N)@5; Methylthio(C)@14; Methylthio(C)@29		3343.49	5	99	20	4.71158	1	8	85.35	85.4521
1401	83	sp|P20160|CAP7_HUMAN	HFCGGALIHAR	iTRAQ8plex@N-term; Methylthio(C)@3		1530.79	2	99	16	4.37436	1	3	51.6294	51.609
1402	83	sp|P20160|CAP7_HUMAN	QFPFLASIQNQGR	iTRAQ8plex@N-term		1808.98	1	99	15	5.02336	1	24	68.7962	68.8048
1403	83	sp|P20160|CAP7_HUMAN	QTFSISSMSENGYDPQQNLNDLMLLQLDR	iTRAQ8plex@N-term; Deamidated(N)@18		3661.75	2	99	17	3.78497	0.0674644	15	82.3298	82.4736
1404	83	sp|P20160|CAP7_HUMAN	QTFSISSMSENGYDPQQNLNDLMLLQLDR	iTRAQ8plex@N-term; Oxidation(M)@8		3676.77	2	99	19	4.92556	0.932536	1	78.5914	78.641
1405	83	sp|P20160|CAP7_HUMAN	RGGICNGDGGTPLVCEGLAHGVASFSLGPCGR	iTRAQ8plex@N-term; Methylthio(C)@5; Deamidated(N)@6; Methylthio(C)@15; Methylthio(C)@30	missed R-G@1	3499.59	6	99	12	4.58772	1	1	81.349	81.3559
1406	84	sp|P19105|MRLC3_HUMAN	ATSNVFAMFDQSQIQEFK	iTRAQ8plex@N-term; iTRAQ8plex(K)@18		2698.39	2	99	11	3.20358	1	2	75.2224	75.1879
1407	84	sp|P19105|MRLC3_HUMAN	DGFIDKEDLHDMLASLGK	iTRAQ8plex@N-term; iTRAQ8plex(K)@6; iTRAQ8plex(K)@18	missed K-E@6	2915.58	4	99	12	5.48	1	6	70.2857	70.3496
1408	84	sp|P19105|MRLC3_HUMAN	EAFNMIDQNR	iTRAQ8plex@N-term		1540.76	1	99	12	4.34276	1	8	56.2357	56.285
1409	84	sp|P19105|MRLC3_HUMAN	FTDEEVDELYR	iTRAQ8plex@N-term		1718.83	1	99	15	4.89188	1	8	61.654	61.7227
1410	84	sp|P19105|MRLC3_HUMAN	GNFNYIEFTR	iTRAQ8plex@N-term		1563.8	1	99	11	4.57389	1	5	61.3183	61.2812
1411	84	sp|P19105|MRLC3_HUMAN	LNGTDPEDVIR	iTRAQ8plex@N-term; Deamidated(N)@2		1532.8	2	99	11	4.11287	1	4	57.2426	57.2479
1412	84	sp|P19105|MRLC3_HUMAN	NPTDEYLDAMMNEAPGPINFTMFLTMFGEK	iTRAQ8plex@N-term; iTRAQ8plex(K)@30		4031.93	2	99	12	4.38858	0.893511	1	97.2169	97.1846
1413	84	sp|P19105|MRLC3_HUMAN	NPTDEYLDAMMNEAPGPINFTMFLTMFGEK	iTRAQ8plex@N-term; Deamidated(N)@19; iTRAQ8plex(K)@30		4032.91	3	99	11	3.46479	0.106489	1	97.1689	97.1368
1414	85	sp|P08246|ELNE_HUMAN	ARPHAWPFMVSLQLR	iTRAQ8plex@N-term		2112.17	1	99	15	5.47551	1	24	63.9747	63.8705
1415	85	sp|P08246|ELNE_HUMAN	LGNGVQCLAMGWGLLGR	iTRAQ8plex@N-term; Methylthio(C)@7		2094.08	2	99	14	4.85197	0.0707587	9	85.8514	85.9464
1416	85	sp|P08246|ELNE_HUMAN	LGNGVQCLAMGWGLLGR	iTRAQ8plex@N-term; Deamidated(N)@3; Methylthio(C)@7		2095.07	3	99	21	5.97032	0.929241	49	87.1165	87.2335
1417	85	sp|P08246|ELNE_HUMAN	QAGVCFGDSGSPLVCNGLIHGIASFVR	Gln->pyro-Glu@N-term; Methylthio(C)@5; Methylthio(C)@15		2778.27	3	99	13	5.1614	0.325126	9	93.9052	94.0434
1418	85	sp|P08246|ELNE_HUMAN	QAGVCFGDSGSPLVCNGLIHGIASFVR	iTRAQ8plex@N-term; Methylthio(C)@5; Methylthio(C)@15		3099.51	3	99	22	5.34343	0.494406	16	85.7598	85.8566
1419	85	sp|P08246|ELNE_HUMAN	QAGVCFGDSGSPLVCNGLIHGIASFVR	iTRAQ8plex@N-term; Methylthio(C)@5; Methylthio(C)@15; Deamidated(N)@16		3100.49	4	99	17	4.90575	0.180468	24	80.2322	80.2039
1420	85	sp|P08246|ELNE_HUMAN	QVFAVQR	iTRAQ8plex@N-term		1150.68	1	99	12	4.29704	1	6	48.2729	48.2782
1421	85	sp|P08246|ELNE_HUMAN	RLGNGVQCLAMGWGLLGR	iTRAQ8plex@N-term; Methylthio(C)@8	missed R-L@1	2250.19	3	99	13	4.70405	0.251154	9	78.528	78.4662
1422	85	sp|P08246|ELNE_HUMAN	RLGNGVQCLAMGWGLLGR	iTRAQ8plex@N-term; Deamidated(N)@4; Methylthio(C)@8	missed R-L@1	2251.17	4	99	17	5.1785	0.748846	21	81.2811	81.318
1423	85	sp|P08246|ELNE_HUMAN	SNVCTLVR	iTRAQ8plex@N-term; Methylthio(C)@4		1240.66	2	99	8	4.35627	1	9	58.2759	58.2682
1424	85	sp|P08246|ELNE_HUMAN	VVLGAHNLSR	iTRAQ8plex@N-term		1368.81	1	99	15	4.31393	1	4	48.1549	48.2174
1425	86	sp|P23528|COF1_HUMAN	EILVGDVGQTVDDPYATFVK	iTRAQ8plex@N-term; iTRAQ8plex(K)@20		2773.5	2	99	14	4.62661	0.640236	6	73.3968	73.3714
1426	86	sp|P23528|COF1_HUMAN	EILVGDVGQTVDDPYATFVK	iTRAQ8plex@N-term; Deamidated(Q)@9; iTRAQ8plex(K)@20		2774.48	3	99	13	4.37628	0.359764	1	73.3494	73.3273
1427	86	sp|P23528|COF1_HUMAN	HELQANCYEEVK	iTRAQ8plex@N-term; Methylthio(C)@7; iTRAQ8plex(K)@12		2116.05	3	99	14	4.5731	1	11	54.1991	54.1351
1428	86	sp|P23528|COF1_HUMAN	KEDLVFIFWAPESAPLK	iTRAQ8plex@N-term; iTRAQ8plex(K)@1; iTRAQ8plex(K)@17	missed K-E@1	2901.68	4	99	15	4.48057	1	7	77.7481	77.7534
1429	86	sp|P23528|COF1_HUMAN	NIILEEGK	iTRAQ8plex@N-term; iTRAQ8plex(K)@8		1522.92	2	99	10	4.00337	1	3	53.7938	53.8124
1430	86	sp|P23528|COF1_HUMAN	YALYDATYETK	iTRAQ8plex@N-term; iTRAQ8plex(K)@11		1945.03	2	99	12	4.67916	1	9	57.7166	57.7743
1431	87	sp|P30041|PRDX6_HUMAN	DINAYNCEEPTEK	iTRAQ8plex@N-term; Methylthio(C)@7; iTRAQ8plex(K)@13		2179.04	3	98.31	11	3.83308	1	1	55.1105	55.0701
1432	87	sp|P30041|PRDX6_HUMAN	ELAILLGMLDPAEK	iTRAQ8plex@N-term; iTRAQ8plex(K)@14		2120.24	2	99	10	4.14826	1	3	88.8085	88.7898
1433	87	sp|P30041|PRDX6_HUMAN	ELAILLGMLDPAEKDEK	iTRAQ8plex@N-term; iTRAQ8plex(K)@14; iTRAQ8plex(K)@17	missed K-D@14	2796.61	4	99	12	4.81491	1	14	81.5942	81.6624
1434	87	sp|P30041|PRDX6_HUMAN	LPFPIIDDR	iTRAQ8plex@N-term		1388.8	1	99	9	4.66962	1	8	68.4272	68.4194
1435	87	sp|P30041|PRDX6_HUMAN	LSILYPATTGR	iTRAQ8plex@N-term		1494.87	1	99	8	4.16985	1	3	65.6689	65.657
1436	87	sp|P30041|PRDX6_HUMAN	VVFVFGPDK	iTRAQ8plex@N-term; iTRAQ8plex(K)@9		1614.96	2	99	11	4.49472	1	6	65.3572	65.3858
1437	87	sp|P30041|PRDX6_HUMAN	VVISLQLTAEK	iTRAQ8plex@N-term; iTRAQ8plex(K)@11		1808.12	2	99	13	4.91503	1	9	65.314	65.3392
1438	88	sp|P13639|EF2_HUMAN	ALLELQLEPEELYQTFQR	iTRAQ8plex@N-term		2523.35	1	99	15	5.43569	0.7382	18	82.6835	82.4262
1439	88	sp|P13639|EF2_HUMAN	ALLELQLEPEELYQTFQR	iTRAQ8plex@N-term; Deamidated(Q)@6		2524.34	2	99	13	4.98548	0.2618	2	82.6945	82.9332
1440	88	sp|P13639|EF2_HUMAN	EGIPALDNFLDKL	iTRAQ8plex@N-term; iTRAQ8plex(K)@12	missed K-L@12	2052.17	3	99	12	5.22189	1	13	81.6372	81.5731
1441	88	sp|P13639|EF2_HUMAN	GVQYLNEIKDSVVAGFQWATK	iTRAQ8plex@N-term; iTRAQ8plex(K)@9; iTRAQ8plex(K)@21	missed K-D@9	3264.83	4	97.69	11	4.86798	1	2	84.6695	84.6447
1442	88	sp|P13639|EF2_HUMAN	IWCFGPDGTGPNILTDITK	iTRAQ8plex@N-term; Methylthio(C)@3; iTRAQ8plex(K)@19		2701.41	3	99	11	4.82178	0.605966	9	83.3179	83.3713
1443	88	sp|P13639|EF2_HUMAN	IWCFGPDGTGPNILTDITK	iTRAQ8plex@N-term; Methylthio(C)@3; Deamidated(N)@12; iTRAQ8plex(K)@19		2702.39	4	99	12	4.63486	0.394034	1	83.4258	83.4344
1444	88	sp|P13639|EF2_HUMAN	STAISLFYELSENDLNFIK	iTRAQ8plex@N-term; iTRAQ8plex(K)@19		2811.52	2	99	11	4.51655	0.701375	1	87.0622	87.1273
1445	88	sp|P13639|EF2_HUMAN	STAISLFYELSENDLNFIK	iTRAQ8plex@N-term; Deamidated(N)@13; iTRAQ8plex(K)@19		2812.5	3	99	13	4.14572	0.298625	2	87.2991	87.278
1446	88	sp|P13639|EF2_HUMAN	TFCQLILDPIFK	iTRAQ8plex@N-term; Methylthio(C)@3; iTRAQ8plex(K)@12		2091.17	3	99	13	4.24888	1	2	87.9255	87.9052
1447	89	sp|P55072|TERA_HUMAN	GPELLTMWFGESEANVR	iTRAQ8plex@N-term; Oxidation(M)@7		2255.12	2	97.86	10	4.48417	1	1	79.8239	79.7589
1448	89	sp|P55072|TERA_HUMAN	IVSQLLTLMDGLK	iTRAQ8plex@N-term; iTRAQ8plex(K)@13		2038.23	2	99	11	3.98807	1	11	94.997	95.1157
1449	89	sp|P55072|TERA_HUMAN	LDQLIYIPLPDEK	iTRAQ8plex@N-term; iTRAQ8plex(K)@13		2164.26	2	99	10	4.33054	1	3	76.2088	76.1975
1450	89	sp|P55072|TERA_HUMAN	LIVDEAINEDNSVVSLSQPK	iTRAQ8plex@N-term; iTRAQ8plex(K)@20		2777.53	2	99	11	4.89521	1	4	68.9931	68.9199
1451	89	sp|P55072|TERA_HUMAN	MTNGFSGADLTEICQR	iTRAQ8plex@N-term; Deamidated(N)@3; Methylthio(C)@14		2092.95	3	99	15	4.3799	1	1	72.3145	72.2916
1452	89	sp|P55072|TERA_HUMAN	VINQILTEMDGMSTK	iTRAQ8plex@N-term; iTRAQ8plex(K)@15		2287.24	2	99	13	4.5633	1	2	81.8212	81.7966
1453	90	sp|P00738|HPT_HUMAN	DIAPTLTLYVGK	iTRAQ8plex@N-term; iTRAQ8plex(K)@12		1898.13	2	99	16	5.27536	1	14	65.0304	65.1296
1454	90	sp|P00738|HPT_HUMAN	QLVEIEK	iTRAQ8plex@N-term; iTRAQ8plex(K)@7		1465.9	2	97.72	9	4.01068	1	4	54.2512	54.2714
1455	90	sp|P00738|HPT_HUMAN	SCAVAEYGVYVK	iTRAQ8plex@N-term; Methylthio(C)@2; iTRAQ8plex(K)@12		1942.02	3	99	13	5.07024	1	8	62.0751	62.1812
1456	90	sp|P00738|HPT_HUMAN	SPVGVQPILNEHTFCAGMSK	iTRAQ8plex@N-term; Methylthio(C)@15; iTRAQ8plex(K)@20		2768.43	3	99	15	5.29654	0.905461	7	65.9785	66.0367
1457	90	sp|P00738|HPT_HUMAN	SPVGVQPILNEHTFCAGMSK	iTRAQ8plex@N-term; Deamidated(N)@10; Methylthio(C)@15; iTRAQ8plex(K)@20		2769.41	4	99	11	4.31528	0.0945387	2	67.9803	67.9517
1458	90	sp|P00738|HPT_HUMAN	VTSIQDWVQK	iTRAQ8plex@N-term; iTRAQ8plex(K)@10		1811.04	2	99	13	5.05108	1	11	63.5084	63.4424
1459	90	sp|P00738|HPT_HUMAN	YVMLPVADQDQCIR	iTRAQ8plex@N-term; Methylthio(C)@12		1999.98	2	99	15			6	67.6334	67.5935
1460	91	sp|P08670|VIME_HUMAN	EMEENFAVEAANYQDTIGR	iTRAQ8plex@N-term		2490.16	1	99	20	4.79142	1	6	67.4525	67.5483
1461	91	sp|P08670|VIME_HUMAN	ILLAELEQLK	iTRAQ8plex@N-term; iTRAQ8plex(K)@10		1777.12	2	99	12	4.9358	1	22	79.8103	79.8438
1462	91	sp|P08670|VIME_HUMAN	LGDLYEEEMR	iTRAQ8plex@N-term		1557.77	1	99	14	4.8391	1	2	62.0542	62.0627
1463	91	sp|P08670|VIME_HUMAN	LQDEIQNMKEEMAR	iTRAQ8plex@N-term; iTRAQ8plex(K)@9	missed K-E@9	2342.22	3	99	13	4.98034	1	5	66.6554	66.669
1464	91	sp|P08670|VIME_HUMAN	MALDIEIATYR	iTRAQ8plex@N-term		1598.86	1	99	12	4.69914	1	4	67.6054	67.6791
1465	91	sp|P08670|VIME_HUMAN	QVQSLTCEVDALK	iTRAQ8plex@N-term; Methylthio(C)@7; iTRAQ8plex(K)@13		2087.12	3	98.49	10	4.78432	1	4	66.0066	65.9748
1466	92	sp|P49913|CAMP_HUMAN	AIDGINQR	iTRAQ8plex@N-term		1189.67	1	99	14	4.20772	1	6	44.8505	44.8557
1467	92	sp|P49913|CAMP_HUMAN	CMGTVTLNQAR	iTRAQ8plex@N-term; Methylthio(C)@1		1542.76	2	99	13	4.47243	1	7	58.0761	58.1977
1468	92	sp|P49913|CAMP_HUMAN	FALLGDFFR	iTRAQ8plex@N-term		1388.78	1	99	14	5.87518	1	99	85.4768	85.4521
1469	92	sp|P49913|CAMP_HUMAN	SSDANLYR	iTRAQ8plex@N-term		1228.64	1	99	13	3.86297	1	7	42.136	42.1465
1470	92	sp|P49913|CAMP_HUMAN	TTQQSPEDCDFK	iTRAQ8plex@N-term; Methylthio(C)@9; iTRAQ8plex(K)@12		2051.98	3	99	14	4.26138	1	13	53.393	53.4439
1471	93	sp|P07384|CAN1_HUMAN	LGLVEFNILWNR	iTRAQ8plex@N-term		1777.02	1	99	12	4.62184	1	3	82.031	82.0662
1472	93	sp|P07384|CAN1_HUMAN	LYELIITR	iTRAQ8plex@N-term		1323.81	1	99	10	4.53226	1	6	71.7247	71.7005
1473	93	sp|P07384|CAN1_HUMAN	MEDGEFWMSFR	iTRAQ8plex@N-term		1737.78	1	99	11	4.89667	1	7	71.98	71.9869
1474	93	sp|P07384|CAN1_HUMAN	QLAGEDMEISVK	iTRAQ8plex@N-term; iTRAQ8plex(K)@12		1927.05	2	99	13	4.66925	1	6	56.9524	57.0135
1475	93	sp|P07384|CAN1_HUMAN	TLDTDLDGVVTFDLFK	iTRAQ8plex@N-term; iTRAQ8plex(K)@16		2406.31	2	99	11	4.60538	1	1	80.4019	80.3911
1476	93	sp|P07384|CAN1_HUMAN	WLQLTMFA	iTRAQ8plex@N-term		1312.72	1	99	7	5.1441	1	5	88.3609	88.2089
1477	94	sp|P11021|GRP78_HUMAN	AKFEELNMDLFR	iTRAQ8plex@N-term; iTRAQ8plex(K)@2	missed K-F@2	2120.16	3	99	11	4.71388	1	6	65.643	65.6766
1478	94	sp|P11021|GRP78_HUMAN	DNHLLGTFDLTGIPPAPR	iTRAQ8plex@N-term		2237.21	1	99	12	4.32895	1	3	67.2663	67.2316
1479	94	sp|P11021|GRP78_HUMAN	ELEEIVQPIISK	iTRAQ8plex@N-term; iTRAQ8plex(K)@12		2005.19	2	99	10	4.79253	1	9	70.9325	70.8626
1480	94	sp|P11021|GRP78_HUMAN	FEELNMDLFR	iTRAQ8plex@N-term		1616.82	1	99	11	5.08567	1	15	75.0145	75.0728
1481	94	sp|P11021|GRP78_HUMAN	IEWLESHQDADIEDFK	iTRAQ8plex@N-term; iTRAQ8plex(K)@16		2582.31	2	99	9	4.82191	1	10	68.8795	69.1296
1482	95	sp|P16671|CD36_HUMAN	AFASPVENPDNYCFCTEK	iTRAQ8plex@N-term; Methylthio(C)@13; Methylthio(C)@15; iTRAQ8plex(K)@18		2734.24	4	99	12	4.54742	1	4	71.8054	71.834
1483	95	sp|P16671|CD36_HUMAN	QVVLEEGTIAFK	iTRAQ8plex@N-term; iTRAQ8plex(K)@12		1941.14	2	99	12	4.49629	1	3	64.4196	64.3981
1484	95	sp|P16671|CD36_HUMAN	RLQVNLLVKPSEK	iTRAQ8plex@N-term; iTRAQ8plex(K)@9; iTRAQ8plex(K)@13	missed R-L@1	2435.54	4	98.6	10	3.87552	1	1	54.8457	54.7882
1485	95	sp|P16671|CD36_HUMAN	SIYAVFESDVNLK	iTRAQ8plex@N-term; iTRAQ8plex(K)@13		2092.17	2	99	11	4.74661	1	5	70.8423	70.8175
1486	95	sp|P16671|CD36_HUMAN	SQVLQFFSSDICR	iTRAQ8plex@N-term; Methylthio(C)@12		1878.93	2	99	10	4.73827	1	13	80.4869	80.6343
1487	95	sp|P16671|CD36_HUMAN	TYLDIEPITGFTLQFAK	iTRAQ8plex@N-term; iTRAQ8plex(K)@17		2564.44	2	99	13	4.99612	1	10	81.5087	81.5389
1488	96	sp|Q9HDC9|APMAP_HUMAN	FPNGVQLSPAEDFVLVAETTMAR	iTRAQ8plex@N-term; Deamidated(N)@3		2796.43	2	99	16	4.63905	1	15	88.4463	88.5212
1489	96	sp|Q9HDC9|APMAP_HUMAN	LFENQLVGPESIAHIGDVMFTGTADGR	iTRAQ8plex@N-term		3177.61	1	99	15	4.89244	0.459821	15	80.6722	80.8135
1490	96	sp|Q9HDC9|APMAP_HUMAN	LFENQLVGPESIAHIGDVMFTGTADGR	iTRAQ8plex@N-term; Deamidated(N)@4		3178.59	2	99	13	4.96239	0.540179	2	80.6173	80.7689
1491	96	sp|Q9HDC9|APMAP_HUMAN	LLLSSETPIEGK	iTRAQ8plex@N-term; iTRAQ8plex(K)@12		1894.12	2	99	12	4.58997	1	3	62.2112	62.1907
1492	96	sp|Q9HDC9|APMAP_HUMAN	VYVSGLMK	iTRAQ8plex@N-term; iTRAQ8plex(K)@8		1503.89	2	99	11	4.14283	1	3	58.6818	58.7154
1493	96	sp|Q9HDC9|APMAP_HUMAN	YSLVLELSDSGAFR	iTRAQ8plex@N-term		1859.99	1	99	11	4.66602	1	9	79.0282	78.873
1494	97	sp|P04899|GNAI2_HUMAN	AMGNLQIDFADPSR	iTRAQ8plex@N-term		1837.93	1	99	15	4.71052	0.730991	12	65.5123	65.5663
1495	97	sp|P04899|GNAI2_HUMAN	AMGNLQIDFADPSR	iTRAQ8plex@N-term; Oxidation(M)@2		1853.92	2	99	9	4.27637	0.269009	1	59.6718	59.6921
1496	97	sp|P04899|GNAI2_HUMAN	AVVYSNTIQSIMAIVK	iTRAQ8plex@N-term; iTRAQ8plex(K)@16		2344.36	2	99	12	4.34317	1	6	83.3609	83.3393
1497	97	sp|P04899|GNAI2_HUMAN	DLFEEK	iTRAQ8plex@N-term; iTRAQ8plex(K)@6		1387.78	2	97.74	7	3.97364	1	5	54.2462	54.226
1498	97	sp|P04899|GNAI2_HUMAN	EYQLNDSAAYYLNDLER	iTRAQ8plex@N-term		2380.15	1	99	17	5.06187	0.813503	6	70.2548	70.3162
1499	97	sp|P04899|GNAI2_HUMAN	EYQLNDSAAYYLNDLER	iTRAQ8plex@N-term; Deamidated(N)@13		2381.13	2	99	15	4.42218	0.186497	7	71.2087	71.1736
1500	97	sp|P04899|GNAI2_HUMAN	LFDSICNNK	iTRAQ8plex@N-term; Methylthio(C)@6; iTRAQ8plex(K)@9		1706.89	3	98.85	7	4.26131	1	3	70.4659	70.4961
1501	97	sp|P04899|GNAI2_HUMAN	YDEAASYIQSK	iTRAQ8plex@N-term; iTRAQ8plex(K)@11		1881.99	2	99	10	4.29688	1	3	58.4277	58.4496
1502	98	sp|P61586|RHOA_HUMAN	DQFPEVYVPTVFENYVADIEVDGK	iTRAQ8plex@N-term; iTRAQ8plex(K)@24		3380.73	2	99	19	4.75941	1	10	86.2539	86.3035
1503	98	sp|P61586|RHOA_HUMAN	EVFEMATR	iTRAQ8plex@N-term		1285.66	1	98.31	10	4.54368	1	5	57.3257	57.3829
1504	98	sp|P61586|RHOA_HUMAN	HFCPNVPIILVGNK	iTRAQ8plex@N-term; Methylthio(C)@3; iTRAQ8plex(K)@14		2204.24	3	99	12	4.71299	1	8	67.0308	67.066
1505	98	sp|P61586|RHOA_HUMAN	LVIVGDGACGK	iTRAQ8plex@N-term; Methylthio(C)@9; iTRAQ8plex(K)@11		1684.95	3	99	11	4.85555	1	6	63.3869	63.2733
1506	98	sp|P61586|RHOA_HUMAN	QVELALWDTAGQEDYDR	iTRAQ8plex@N-term		2312.12	1	99	18	4.30464	1	7	68.9339	68.9838
1507	98	sp|P61586|RHOA_HUMAN	TCLLIVFSK	iTRAQ8plex@N-term; Methylthio(C)@2; iTRAQ8plex(K)@9		1676.98	3	99	9	4.3241	1	3	78.4343	78.3761
1508	99	sp|P24158|PRTN3_HUMAN	DIPQRLVNVVLGAHNVR	iTRAQ8plex@N-term	missed R-L@5	2203.29	2	99	11	4.34567	1	5	66.0506	66.0324
1509	99	sp|P24158|PRTN3_HUMAN	GNPGSHFCGGTLIHPSFVLTAAHCLR	iTRAQ8plex@N-term; Methylthio(C)@8; Methylthio(C)@24		3087.5	3	99	8	5.02296	1	2	69.7105	69.6084
1510	99	sp|P24158|PRTN3_HUMAN	LFPDFFTR	iTRAQ8plex@N-term		1345.73	1	99	12	6.29778	1	33	73.3014	73.0578
1511	99	sp|P24158|PRTN3_HUMAN	LVNVVLGAHNVR	iTRAQ8plex@N-term		1593.96	1	99	16	5.42252	0.876682	18	62.7491	62.7306
1512	99	sp|P24158|PRTN3_HUMAN	LVNVVLGAHNVR	iTRAQ8plex@N-term; Deamidated(N)@3		1594.95	2	99	14	4.57071	0.123318	4	60.9426	60.9761
1513	99	sp|P24158|PRTN3_HUMAN	TQEPTQQHFSVAQVFLNNYDAENK	iTRAQ8plex@N-term; iTRAQ8plex(K)@24		3415.73	2	99	16	4.77012	0.61073	4	65.5933	65.6036
1514	99	sp|P24158|PRTN3_HUMAN	TQEPTQQHFSVAQVFLNNYDAENK	iTRAQ8plex@N-term; Deamidated(N)@17; iTRAQ8plex(K)@24		3416.71	3	97.47	13	4.57452	0.38927	1	64.5419	64.5504
1515	99	sp|P24158|PRTN3_HUMAN	VALYVDWIR	iTRAQ8plex@N-term		1437.83	1	99	15	6.08846	1	35	73.3098	73.2359
1516	100	sp|P36222|CH3L1_HUMAN	EAGTLAYYEICDFLR	iTRAQ8plex@N-term; Methylthio(C)@11		2113.02	2	99	13	4.73963	1	6	85.6966	85.7218
1517	100	sp|P36222|CH3L1_HUMAN	LVMGIPTFGR	iTRAQ8plex@N-term		1393.81	1	99	7	4.42812	1	2	68.8125	68.8045
1518	100	sp|P36222|CH3L1_HUMAN	SFTLASSETGVGAPISGPGIPGR	iTRAQ8plex@N-term		2461.31	1	99	15	4.52194	1	3	64.7452	64.7537
1519	100	sp|P36222|CH3L1_HUMAN	THGFDGLDLAWLYPGR	iTRAQ8plex@N-term		2121.09	1	99	19	4.66799	1	6	74.7303	74.703
1520	100	sp|P36222|CH3L1_HUMAN	TLLSVGGWNFGSQR	iTRAQ8plex@N-term		1824.98	1	99	11	4.52394	1	4	68.9649	68.9484
1521	100	sp|P36222|CH3L1_HUMAN	VTIDSSYDIAK	iTRAQ8plex@N-term; iTRAQ8plex(K)@11		1819.02	2	99	11	4.37357	1	4	56.528	56.5416
1522	101	sp|P27797|CALR_HUMAN	EQFLDGDGWTSR	iTRAQ8plex@N-term		1713.83	1	99	12	4.40372	1	15	61.6336	61.6388
1523	101	sp|P27797|CALR_HUMAN	FYALSASFEPFSNK	iTRAQ8plex@N-term; iTRAQ8plex(K)@14		2215.18	2	99	13	5.0736	1	7	75.8812	75.9498
1524	101	sp|P27797|CALR_HUMAN	GQTLVVQFTVK	iTRAQ8plex@N-term; iTRAQ8plex(K)@11		1827.11	2	99	15	4.96591	1	11	62.5001	62.5955
1525	101	sp|P27797|CALR_HUMAN	IDNSQVESGSLEDDWDFLPPK	iTRAQ8plex@N-term; iTRAQ8plex(K)@21		2998.5	2	99	14	4.6097	1	4	71.4386	71.4023
1526	101	sp|P27797|CALR_HUMAN	SGTIFDNFLITNDEAYAEEFGNETWGVTK	iTRAQ8plex@N-term; iTRAQ8plex(K)@29		3875.9	2	99	13	4.61014	1	5	84.546	84.5095
1527	102	sp|P31939|PUR9_HUMAN	ALFEEVPELLTEAEK	iTRAQ8plex@N-term; iTRAQ8plex(K)@15		2325.29	2	99	14	5.29102	1	10	79.5389	79.647
1528	102	sp|P31939|PUR9_HUMAN	DVSELTGFPEMLGGR	iTRAQ8plex@N-term		1910.97	1	99	11	4.56683	1	2	70.8268	70.8537
1529	102	sp|P31939|PUR9_HUMAN	EVSDGIIAPGYEEEALTILSK	iTRAQ8plex@N-term; iTRAQ8plex(K)@21		2841.55	2	99	11	4.79747	1	4	77.3267	77.3018
1530	102	sp|P31939|PUR9_HUMAN	LTEVSISSDAFFPFR	iTRAQ8plex@N-term		2019.06	1	99	10	4.93781	1	1	79.2427	79.1396
1531	102	sp|P31939|PUR9_HUMAN	TLHPAVHAGILAR	iTRAQ8plex@N-term		1658.99	1	97.84	8	3.60466	1	1	47.6837	47.6717
1532	102	sp|P31939|PUR9_HUMAN	VVACNLYPFVK	iTRAQ8plex@N-term; Methylthio(C)@4; iTRAQ8plex(K)@11		1906.07	3	99	8	4.34177	1	2	72.2755	72.256
1533	103	sp|P06576|ATPB_HUMAN	AHGGYSVFAGVGER	iTRAQ8plex@N-term		1709.88	1	99	9	4.02526	1	1	51.7752	51.9257
1534	103	sp|P06576|ATPB_HUMAN	AIAELGIYPAVDPLDSTSR	iTRAQ8plex@N-term		2291.23	1	99	14	4.36883	1	1	73.8367	73.8536
1535	103	sp|P06576|ATPB_HUMAN	DQEGQDVLLFIDNIFR	iTRAQ8plex@N-term		2225.16	1	99	15	4.9028	1	6	92.1552	92.2261
1536	103	sp|P06576|ATPB_HUMAN	IMNVIGEPIDER	iTRAQ8plex@N-term		1688.91	1	99	11	4.4742	1	1	66.6139	66.5791
1537	103	sp|P06576|ATPB_HUMAN	TVLIMELINNVAK	iTRAQ8plex@N-term; iTRAQ8plex(K)@13		2065.24	2	99	11	4.24428	1	5	88.3174	88.4765
1538	103	sp|P06576|ATPB_HUMAN	VVDLLAPYAK	iTRAQ8plex@N-term; iTRAQ8plex(K)@10		1696.04	2	99	10	4.30311	1	1	69.8304	69.8175
1539	104	sp|Q00610|CLH1_HUMAN	AFMTADLPNELIELLEK	iTRAQ8plex@N-term; iTRAQ8plex(K)@17		2554.42	2	99	13	5.02039	0.701602	9	90.6354	90.5593
1540	104	sp|Q00610|CLH1_HUMAN	AFMTADLPNELIELLEK	iTRAQ8plex@N-term; Deamidated(N)@9; iTRAQ8plex(K)@17		2555.4	3	99	11	4.64909	0.298398	1	91.1578	91.2611
1541	104	sp|Q00610|CLH1_HUMAN	DTELAEELLQWFLQEEK	iTRAQ8plex@N-term; iTRAQ8plex(K)@17		2728.44	2	99	14	4.64797	1	9	94.2335	94.3507
1542	104	sp|Q00610|CLH1_HUMAN	LLLPWLEAR	iTRAQ8plex@N-term		1413.87	1	99	11	5.03415	1	6	77.2575	77.2795
1543	104	sp|Q00610|CLH1_HUMAN	SVNESLNNLFITEEDYQALR	iTRAQ8plex@N-term		2658.34	1	99	19	4.70749	1	6	73.2207	73.2359
1544	104	sp|Q00610|CLH1_HUMAN	VANVELYYR	iTRAQ8plex@N-term		1429.79	1	99	13	4.52173	1	1	58.3062	58.313
1545	105	sp|P43490|NAMPT_HUMAN	AVPEGFVIPR	iTRAQ8plex@N-term		1387.81	1	99	9	4.21016	1	4	60.2896	60.2815
1546	105	sp|P43490|NAMPT_HUMAN	GDLEEYGQDLLHTVFK	iTRAQ8plex@N-term; iTRAQ8plex(K)@16		2471.32	2	99	8	4.67729	1	6	77.8675	77.8109
1547	105	sp|P43490|NAMPT_HUMAN	MWSIENIAFGSGGGLLQK	iTRAQ8plex@N-term; iTRAQ8plex(K)@18		2515.37	2	99	16	5.10318	1	10	79.4954	79.5124
1548	105	sp|P43490|NAMPT_HUMAN	VIQGDGVDINTLQEIVEGMK	iTRAQ8plex@N-term; iTRAQ8plex(K)@20		2765.51	2	99	16	5.58164	0.628437	9	81.6389	81.707
1549	105	sp|P43490|NAMPT_HUMAN	VIQGDGVDINTLQEIVEGMK	iTRAQ8plex@N-term; Deamidated(N)@10; iTRAQ8plex(K)@20		2766.49	3	99	13	5.35341	0.371563	2	81.6972	81.815
1550	105	sp|P43490|NAMPT_HUMAN	VLEILGK	iTRAQ8plex@N-term; iTRAQ8plex(K)@7		1378.9	2	98.91	7	3.87274	1	3	68.1249	68.0957
1551	105	sp|P43490|NAMPT_HUMAN	VYSYFECR	iTRAQ8plex@N-term; Methylthio(C)@7		1415.65	2	99	12	4.93729	1	5	66.788	66.8049
1552	106	sp|P17858|K6PL_HUMAN	AMLWLSEK	iTRAQ8plex@N-term; iTRAQ8plex(K)@8		1584.92	2	99	10	4.20701	1	5	67.243	67.2316
1553	106	sp|P17858|K6PL_HUMAN	GQLESIVENIR	iTRAQ8plex@N-term		1560.88	1	98.45	10	4.50586	1	8	65.4553	65.4889
1554	106	sp|P17858|K6PL_HUMAN	GQVQEVGWHDVAGWLGR	iTRAQ8plex@N-term		2197.13	1	99	22	4.57738	1	5	68.2974	68.271
1555	106	sp|P17858|K6PL_HUMAN	IMEVIDAITTTAQSHQR	iTRAQ8plex@N-term		2217.17	1	99	20	5.08918	1	12	82.6785	82.7423
1556	106	sp|P17858|K6PL_HUMAN	QANWLSVSNIIQLGGTIIGSAR	iTRAQ8plex@N-term		2601.45	1	99	9	3.83097	1	1	91.0423	91.0625
1557	106	sp|P17858|K6PL_HUMAN	SEWGSLLEELVAEGK	iTRAQ8plex@N-term; iTRAQ8plex(K)@15		2254.23	2	99	13	4.43827	1	1	81.1246	81.0587
1558	107	sp|P37802|TAGL2_HUMAN	DDGLFSGDPNWFPK	iTRAQ8plex@N-term; iTRAQ8plex(K)@14		2202.12	2	99	15	5.34317	1	13	70.7026	70.7681
1559	107	sp|P37802|TAGL2_HUMAN	QMEQISQFLQAAER	iTRAQ8plex@N-term		1982.02	1	99	11	4.35363	1	7	74.898	74.8792
1560	107	sp|P37802|TAGL2_HUMAN	QYDADLEQILIQWITTQCR	iTRAQ8plex@N-term; Methylthio(C)@18		2686.34	2	99	18	4.15057	1	1	97.3914	97.4066
1561	107	sp|P37802|TAGL2_HUMAN	TLMNLGGLAVAR	iTRAQ8plex@N-term		1518.89	1	99	13	4.71029	1	6	65.0106	64.9989
1562	107	sp|P37802|TAGL2_HUMAN	YGINTTDIFQTVDLWEGK	iTRAQ8plex@N-term; iTRAQ8plex(K)@18		2707.43	2	99	10	4.27749	1	1	82.2015	82.1662
1563	108	sp|P00387|NB5R3_HUMAN	APEAWDYGQGFVNEEMIR	iTRAQ8plex@N-term		2415.15	1	99	19	4.95052	1	6	70.2183	70.2755
1564	108	sp|P00387|NB5R3_HUMAN	DILLRPELEELR	iTRAQ8plex@N-term		1799.05	1	99	12	4.81684	1	5	63.6844	63.713
1565	108	sp|P00387|NB5R3_HUMAN	GPSGLLVYQGK	iTRAQ8plex@N-term; iTRAQ8plex(K)@11		1726.02	2	99	9	3.86469	1	1	57.371	57.4277
1566	108	sp|P00387|NB5R3_HUMAN	MSQYLESMQIGDTIEFR	iTRAQ8plex@N-term		2351.14	1	99	18	4.69302	1	1	75.9446	75.8596
1567	108	sp|P00387|NB5R3_HUMAN	SVGMIAGGTGITPMLQVIR	iTRAQ8plex@N-term		2204.23	1	99	19	5.00422	1	9	74.1088	74.1258
1568	109	sp|O94919|ENDD1_HUMAN	ALTPQCGSGEDLYILTGTVPSDYR	iTRAQ8plex@N-term; Methylthio(C)@6		2905.41	2	99	16	4.19095	1	4	76.0573	76.022
1569	109	sp|O94919|ENDD1_HUMAN	ILEVVNQIQDEER	iTRAQ8plex@N-term		1888.02	1	99	10	4.69271	0.816301	2	76.5087	76.5809
1570	109	sp|O94919|ENDD1_HUMAN	ILEVVNQIQDEER	iTRAQ8plex@N-term; Deamidated(N)@6		1889	2	98.4	7	4.04497	0.183699	1	77.8137	77.8869
1571	109	sp|O94919|ENDD1_HUMAN	LLPFNPQLFQNNCGETEQDTEK	iTRAQ8plex@N-term; Methylthio(C)@13; iTRAQ8plex(K)@22		3218.58	3	99	12	4.45899	1	2	75.7128	75.6812
1572	109	sp|O94919|ENDD1_HUMAN	WLVEPQIDDPNSNLEEAINEAEAITSVNSLGSK	iTRAQ8plex@N-term; iTRAQ8plex(K)@33		4190.15	2	99	16	4.80106	0.676001	2	86.9618	87.0128
1573	109	sp|O94919|ENDD1_HUMAN	WLVEPQIDDPNSNLEEAINEAEAITSVNSLGSK	iTRAQ8plex@N-term; Deamidated(N)@28; iTRAQ8plex(K)@33		4191.13	3	99	14	4.48166	0.323999	3	87.4507	87.4112
1574	109	sp|O94919|ENDD1_HUMAN	WYVNLHSLMDR	iTRAQ8plex@N-term		1736.9	1	99	14	4.68729	1	4	67.1672	67.1517
1575	110	sp|P69905|HBA_HUMAN	FLASVSTVLTSK	iTRAQ8plex@N-term; iTRAQ8plex(K)@12		1860.12	2	99	15	5.11907	1	16	76.8763	76.7736
1576	110	sp|P69905|HBA_HUMAN	KVADALTNAVAHVDDMPNALSALSDLHAHK	iTRAQ8plex@N-term; iTRAQ8plex(K)@1; iTRAQ8plex(K)@30	missed K-V@1	4036.19	4	99	12	4.80406	1	2	75.3442	75.5384
1577	110	sp|P69905|HBA_HUMAN	MFLSFPTTK	iTRAQ8plex@N-term; iTRAQ8plex(K)@9		1678.96	2	99	8	4.74253	1	26	65.8927	65.8841
1578	110	sp|P69905|HBA_HUMAN	VADALTNAVAHVDDMPNALSALSDLHAHK	iTRAQ8plex@N-term; iTRAQ8plex(K)@29		3603.89	2	99	17	5.0826	0.54515	19	77.037	77.099
1579	110	sp|P69905|HBA_HUMAN	VADALTNAVAHVDDMPNALSALSDLHAHK	iTRAQ8plex@N-term; Deamidated(N)@17; iTRAQ8plex(K)@29		3604.88	3	99	17	5.00395	0.45485	11	77.5613	77.6197
1580	110	sp|P69905|HBA_HUMAN	VGAHAGEYGAEALER	iTRAQ8plex@N-term		1832.93	1	99	19	4.6909	1	12	50.1948	50.2678
1581	111	sp|P02647|APOA1_HUMAN	DLATVYVDVLK	iTRAQ8plex@N-term; iTRAQ8plex(K)@11		1843.09	2	99	11	4.32443	1	3	68.4828	68.4681
1582	111	sp|P02647|APOA1_HUMAN	EQLGPVTQEFWDNLEK	iTRAQ8plex@N-term; iTRAQ8plex(K)@16		2540.34	2	99	14	4.58055	1	3	72.6913	72.6571
1583	111	sp|P02647|APOA1_HUMAN	LLDNWDSVTSTFSK	iTRAQ8plex@N-term; iTRAQ8plex(K)@14		2220.19	2	99	11	4.58086	1	4	73.2154	73.2766
1584	111	sp|P02647|APOA1_HUMAN	QGLLPVLESFK	iTRAQ8plex@N-term; iTRAQ8plex(K)@11		1838.11	2	99	11	4.4282	1	1	73.8284	73.7649
1585	111	sp|P02647|APOA1_HUMAN	VSFLSALEEYTK	iTRAQ8plex@N-term; iTRAQ8plex(K)@12		1994.12	2	99	12	4.52607	1	3	79.8203	79.8438
1586	112	sp|P22314|UBA1_HUMAN	IYDDDFFQNLDGVANALDNVDAR	iTRAQ8plex@N-term		2903.39	1	99	19	4.9618	1	4	85.0851	85.0472
1587	112	sp|P22314|UBA1_HUMAN	NFPNAIEHTLQWAR	iTRAQ8plex@N-term		2000.05	1	99	12	4.15903	1	3	67.2547	67.2316
1588	112	sp|P22314|UBA1_HUMAN	NGFLNLALPFFGFSEPLAAPR	iTRAQ8plex@N-term		2581.4	1	99	13	4.49217	0.329542	4	91.1951	91.259
1589	112	sp|P22314|UBA1_HUMAN	NGFLNLALPFFGFSEPLAAPR	iTRAQ8plex@N-term; Deamidated(N)@1		2582.38	2	99	19	4.80063	0.670458	9	93.2706	93.3328
1590	112	sp|P22314|UBA1_HUMAN	QFLDYFK	iTRAQ8plex@N-term; iTRAQ8plex(K)@7		1567.89	2	99	9	4.49266	1	6	65.5979	65.5864
1591	112	sp|P22314|UBA1_HUMAN	VLGPYTFSICDTSNFSDYIR	iTRAQ8plex@N-term; Methylthio(C)@10		2647.26	2	99	13	4.76265	1	6	84.5285	84.4922
1592	113	sp|Q10567|AP1B1_HUMAN	ALQVMTDFAIQFNR	iTRAQ8plex@N-term		1957.04	1	99	10	4.27193	1	8	83.9695	83.953
1593	113	sp|Q10567|AP1B1_HUMAN	EYATEVDVDFVR	iTRAQ8plex@N-term		1745.88	1	99	11	4.50659	1	1	61.4934	61.4684
1594	113	sp|Q10567|AP1B1_HUMAN	GLEISGTFTR	iTRAQ8plex@N-term		1383.77	1	99	9	4.09819	1	6	56.7449	56.7331
1595	113	sp|Q10567|AP1B1_HUMAN	LASQANIAQVLAELK	iTRAQ8plex@N-term; iTRAQ8plex(K)@15		2176.3	2	99	16	4.804	1	4	77.7295	77.7062
1596	113	sp|Q10567|AP1B1_HUMAN	LHDINAQLVEDQGFLDTLK	iTRAQ8plex@N-term; iTRAQ8plex(K)@19		2776.52	2	99	9	4.1038	1	2	72.8526	72.9089
1597	114	sp|Q14019|COTL1_HUMAN	DDGSAVIWVTFK	iTRAQ8plex@N-term; iTRAQ8plex(K)@12		1945.08	2	99	13	4.8567	1	2	68.7812	68.8048
1598	114	sp|Q14019|COTL1_HUMAN	EVVQNFAK	iTRAQ8plex@N-term; iTRAQ8plex(K)@8		1541.9	2	99	8	3.68762	1	4	52.3362	52.3631
1599	114	sp|Q14019|COTL1_HUMAN	FALITWIGENVSGLQR	iTRAQ8plex@N-term		2107.17	1	99	9	3.64709	1	2	91.8611	91.8896
1600	114	sp|Q14019|COTL1_HUMAN	LFAFVR	iTRAQ8plex@N-term		1055.64	1	99	9	5.31082	1	5	68.8393	68.9199
1601	114	sp|Q14019|COTL1_HUMAN	YDGSTIVPGEQGAEYQHFIQQCTDDVR	iTRAQ8plex@N-term; Methylthio(C)@22		3405.55	2	99	16	4.69952	1	5	72.808	72.8199
1602	115	sp|O43451|MGA_HUMAN	AYVAFPDFFR	iTRAQ8plex@N-term		1535.81	1	99	11	4.78061	1	7	73.9147	73.95
1603	115	sp|O43451|MGA_HUMAN	FDGMWIDMNEPSSFVNGAVSPGCR	iTRAQ8plex@N-term; Deamidated(N)@16; Methylthio(C)@23		2966.3	3	99	17	4.44111	1	4	78.7375	78.7461
1604	115	sp|O43451|MGA_HUMAN	ILDGYLFCK	iTRAQ8plex@N-term; Methylthio(C)@8; iTRAQ8plex(K)@9		1724.95	3	99	9	4.15168	1	2	77.3152	77.3504
1605	115	sp|O43451|MGA_HUMAN	WMQLGAFYPFSR	iTRAQ8plex@N-term		1805.92	1	99	12	4.78357	1	4	79.2983	79.377
1606	115	sp|O43451|MGA_HUMAN	YEVPVPLNIPSMPSSTPEGQLYDVLIK	iTRAQ8plex@N-term; iTRAQ8plex(K)@27		3593.95	2	99	10	4.81456	0.672934	1	83.7914	83.981
1607	115	sp|O43451|MGA_HUMAN	YEVPVPLNIPSMPSSTPEGQLYDVLIK	iTRAQ8plex@N-term; Deamidated(Q)@20; iTRAQ8plex(K)@27		3594.94	3	99	15	4.50122	0.327066	1	82.3276	82.3362
1608	116	sp|P40925|MDHC_HUMAN	DLDVAILVGSMPR	iTRAQ8plex@N-term		1688.94	1	99	14	5.11192	1	2	72.4243	72.5237
1609	116	sp|P40925|MDHC_HUMAN	EVGVYEALKDDSWLK	iTRAQ8plex@N-term; iTRAQ8plex(K)@9; iTRAQ8plex(K)@15	missed K-D@9	2663.49	4	99	9	5.04536	1	6	68.3081	68.3782
1610	116	sp|P40925|MDHC_HUMAN	FVEGLPINDFSR	iTRAQ8plex@N-term		1696.91	1	99	10	4.77354	1	6	69.0447	69.0549
1611	116	sp|P40925|MDHC_HUMAN	GEFVTTVQQR	iTRAQ8plex@N-term		1467.8	1	99	12	3.58827	1	3	51.0275	50.9973
1612	117	sp|P07948|LYN_HUMAN	GSLLDFLK	iTRAQ8plex@N-term; iTRAQ8plex(K)@8		1499.92	2	99	9	4.85184	1	5	70.4639	70.5911
1613	117	sp|P07948|LYN_HUMAN	ITFPCISDMIK	iTRAQ8plex@N-term; Methylthio(C)@5; iTRAQ8plex(K)@11		1921.03	3	97.5	7	4.61187	1	3	78.9833	79.0975
1614	117	sp|P07948|LYN_HUMAN	LIDFSAQIAEGMAYIER	iTRAQ8plex@N-term		2230.16	1	99	14	4.37627	1	5	89.3893	89.4112
1615	117	sp|P07948|LYN_HUMAN	LNTLETEEWFFK	iTRAQ8plex@N-term; iTRAQ8plex(K)@12		2164.17	2	99	11	4.88162	0.733889	3	74.9253	74.894
1616	117	sp|P07948|LYN_HUMAN	LNTLETEEWFFK	iTRAQ8plex@N-term; Deamidated(N)@2; iTRAQ8plex(K)@12		2165.15	3	99	11	4.44105	0.266111	1	75.7183	75.7819
1617	117	sp|P07948|LYN_HUMAN	VENCPDELYDIMK	iTRAQ8plex@N-term; Methylthio(C)@4; iTRAQ8plex(K)@13		2222.09	3	99	11	4.99546	1	5	73.933	73.9948
1618	118	sp|Q99497|PARK7_HUMAN	DVVICPDASLEDAK	iTRAQ8plex@N-term; Methylthio(C)@5; iTRAQ8plex(K)@14		2128.1	3	99	13	4.61407	1	4	63.834	63.8037
1619	118	sp|Q99497|PARK7_HUMAN	EGPYDVVVLPGGNLGAQNLSESAAVK	iTRAQ8plex@N-term; iTRAQ8plex(K)@26		3191.73	2	99	15	4.82236	1	4	67.6807	67.7362
1620	118	sp|Q99497|PARK7_HUMAN	GAEEMETVIPVDVMR	iTRAQ8plex@N-term		1979	1	99	17	4.88758	1	10	68.3107	68.316
1621	118	sp|Q99497|PARK7_HUMAN	GLIAAICAGPTALLAHEIGFGSK	iTRAQ8plex@N-term; Methylthio(C)@7; iTRAQ8plex(K)@23		2863.59	3	99	10	4.40988	1	2	91.7514	91.6896
1622	118	sp|Q99497|PARK7_HUMAN	GPGTSFEFALAIVEALNGK	iTRAQ8plex@N-term; Deamidated(N)@17; iTRAQ8plex(K)@19		2529.39	3	99	13	4.20358	1	16	94.0718	93.9105
1623	119	sp|Q13510|ASAH1_HUMAN	ASSFAGYVGMLTGFKPGLFSLTLNER	iTRAQ8plex@N-term; iTRAQ8plex(K)@15		3370.82	2	99	8	4.75023	1	3	86.3819	86.2556
1624	119	sp|Q13510|ASAH1_HUMAN	DAMWIGFLTR	iTRAQ8plex@N-term		1512.81	1	99	11	4.27289	1	1	75.0525	75.0281
1625	119	sp|Q13510|ASAH1_HUMAN	DCPDPCIGW	iTRAQ8plex@N-term; Methylthio(C)@2; Methylthio(C)@6		1400.55	3	99	9	4.94691	1	5	80.6333	80.7018
1626	119	sp|Q13510|ASAH1_HUMAN	LPGLLGNFPGPFEEEMK	iTRAQ8plex@N-term; iTRAQ8plex(K)@17		2482.34	2	99	16	4.98044	1	10	80.353	80.4082
1627	119	sp|Q13510|ASAH1_HUMAN	LTVYTTLIDVTK	iTRAQ8plex@N-term; iTRAQ8plex(K)@12		1974.19	2	99	11	4.51384	1	4	74.6351	74.6587
1628	120	sp|P07741|APT_HUMAN	GFLFGPSLAQELGLGCVLIR	iTRAQ8plex@N-term; Methylthio(C)@16		2439.33	2	99	13	4.37923	0.887612	7	94.2827	94.4405
1629	120	sp|P07741|APT_HUMAN	GFLFGPSLAQELGLGCVLIR	iTRAQ8plex@N-term; Deamidated(Q)@10; Methylthio(C)@16		2440.32	3	99	18	3.48173	0.112388	2	94.8371	94.7975
1630	120	sp|P07741|APT_HUMAN	LAPVPFFSLLQYE	iTRAQ8plex@N-term		1827.01	1	99	16	5.17466	1	1	93.6264	93.5919
1631	120	sp|P07741|APT_HUMAN	LQAEVLECVSLVELTSLK	iTRAQ8plex@N-term; Methylthio(C)@8; iTRAQ8plex(K)@18		2627.47	3	99	11	3.75914	1	4	97.5064	97.4955
1632	120	sp|P07741|APT_HUMAN	SFPDFPTPGVVFR	iTRAQ8plex@N-term		1768.95	1	99	10	4.6578	1	7	71.0414	71.0265
1633	120	sp|P07741|APT_HUMAN	VVVVDDLLATGGTMNAACELLGR	iTRAQ8plex@N-term; Methylthio(C)@18		2666.37	2	99	16	4.02107	1	4	93.9366	93.9552
1634	121	sp|P02775|CXCL7_HUMAN	EESLDSDLYAELR	iTRAQ8plex@N-term		1842.92	1	99	15	4.85751	1	7	64.6949	64.7251
1635	121	sp|P02775|CXCL7_HUMAN	GKEESLDSDLYAELR	iTRAQ8plex@N-term; iTRAQ8plex(K)@2	missed K-E@2	2332.24	3	99	16	5.67247	1	30	59.8346	59.8532
1636	121	sp|P02775|CXCL7_HUMAN	GTHCNQVEVIATLK	iTRAQ8plex@N-term; Methylthio(C)@4; iTRAQ8plex(K)@14		2166.18	3	99	16	4.63739	0.759922	16	57.6435	57.6931
1637	121	sp|P02775|CXCL7_HUMAN	GTHCNQVEVIATLK	iTRAQ8plex@N-term; Methylthio(C)@4; Deamidated(N)@5; iTRAQ8plex(K)@14		2167.16	4	99	11	4.13697	0.240078	3	60.3073	60.3192
1638	121	sp|P02775|CXCL7_HUMAN	ICLDPDAPR	iTRAQ8plex@N-term; Methylthio(C)@2		1348.68	2	99	9	4.93289	1	10	57.7471	57.5163
1639	121	sp|P02775|CXCL7_HUMAN	NIQSLEVIGK	iTRAQ8plex@N-term; iTRAQ8plex(K)@10		1708.03	2	99	13	4.5178	1	5	59.9111	59.8742
1640	122	sp|Q99439|CNN2_HUMAN	DGTILCTLMNK	iTRAQ8plex@N-term; Methylthio(C)@6; iTRAQ8plex(K)@11		1861.99	3	99	11	5.09366	0.647271	6	72.1606	72.1024
1641	122	sp|Q99439|CNN2_HUMAN	DGTILCTLMNK	iTRAQ8plex@N-term; Methylthio(C)@6; Deamidated(N)@10; iTRAQ8plex(K)@11		1862.98	4	99	7	4.83001	0.352729	1	72.2525	72.1024
1642	122	sp|Q99439|CNN2_HUMAN	GLQSGVDIGVK	iTRAQ8plex@N-term; iTRAQ8plex(K)@11		1680	2	99	13	4.32558	1	5	54.4762	54.4964
1643	122	sp|Q99439|CNN2_HUMAN	GPSYGLSAEVK	iTRAQ8plex@N-term; iTRAQ8plex(K)@11		1714.97	2	99	14	4.25933	1	7	52.1696	52.1359
1644	122	sp|Q99439|CNN2_HUMAN	SMQNWHQLENLSNFIK	iTRAQ8plex@N-term; iTRAQ8plex(K)@16		2596.37	2	99	11	4.76299	1	11	68.2779	68.2434
1645	122	sp|Q99439|CNN2_HUMAN	TWIEGLTGLSIGPDFQK	iTRAQ8plex@N-term; iTRAQ8plex(K)@17		2469.37	2	99	16	5.57722	1	21	78.9499	79.0085
1646	123	sp|Q10588|BST1_HUMAN	FMPLSDVLYGR	iTRAQ8plex@N-term		1600.86	1	99	12	5.2216	1	8	72.467	72.5237
1647	123	sp|Q10588|BST1_HUMAN	GFFADYEIPNLQK	iTRAQ8plex@N-term; iTRAQ8plex(K)@13		2149.17	2	99	15	5.25541	1	17	69.3041	69.326
1648	123	sp|Q10588|BST1_HUMAN	IEIWVMHEIGGPNVESCGEGSMK	iTRAQ8plex@N-term; Methylthio(C)@17; iTRAQ8plex(K)@23		3155.54	3	99	12	4.62519	1	5	76.6573	76.6692
1649	123	sp|Q10588|BST1_HUMAN	SLFWENSHLLVNSFADNTR	iTRAQ8plex@N-term		2553.29	1	99	16	4.83514	1	9	72.7784	72.7449
1650	123	sp|Q10588|BST1_HUMAN	VADFLSWCR	iTRAQ8plex@N-term; Methylthio(C)@8		1445.71	2	99	13	5.20132	1	11	83.5311	83.5064
1651	124	sp|Q15404|RSU1_HUMAN	ALYLSDNDFEILPPDIGK	iTRAQ8plex@N-term; iTRAQ8plex(K)@18		2627.43	2	99	8	4.55042	1	10	75.185	75.0728
1652	124	sp|Q15404|RSU1_HUMAN	GISNMLDVNGLFTLSHITQLVLSHNK	iTRAQ8plex@N-term; iTRAQ8plex(K)@26		3458.92	2	99	8	4.15809	1	1	85.2116	85.177
1653	124	sp|Q15404|RSU1_HUMAN	LTMVPPNIAELK	iTRAQ8plex@N-term; iTRAQ8plex(K)@12		1933.15	2	99	10	4.27295	1	2	68.1199	68.1402
1654	124	sp|Q15404|RSU1_HUMAN	LTVLPPELGNLDLTGQK	iTRAQ8plex@N-term; iTRAQ8plex(K)@17		2415.42	2	99	12	4.70232	1	13	73.938	73.95
1655	124	sp|Q15404|RSU1_HUMAN	NLEVLNFFNNQIEELPTQISSLQK	iTRAQ8plex@N-term; iTRAQ8plex(K)@24		3425.87	2	99	11	4.63395	1	4	86.7332	86.7024
1656	125	sp|P54819|KAD2_HUMAN	AMVASGSELGK	iTRAQ8plex@N-term; iTRAQ8plex(K)@11		1656.93	2	98.62	9	3.41179	1	1	51.3166	51.2861
1657	125	sp|P54819|KAD2_HUMAN	EKLDSVIEFSIPDSLLIR	iTRAQ8plex@N-term; iTRAQ8plex(K)@2	missed K-L@2	2681.55	3	99	11	4.89543	1	5	76.7544	76.783
1658	125	sp|P54819|KAD2_HUMAN	GIHSAIDASQTPDVVFASILAAFSK	iTRAQ8plex@N-term; iTRAQ8plex(K)@25		3152.73	2	99	14	4.30912	1	1	89.2406	89.2134
1659	125	sp|P54819|KAD2_HUMAN	LDSVIEFSIPDSLLIR	iTRAQ8plex@N-term		2120.2	1	99	17	4.92797	1	6	85.9645	85.9914
1660	125	sp|P54819|KAD2_HUMAN	NGFLLDGFPR	iTRAQ8plex@N-term; Deamidated(N)@1		1439.77	2	99	9	4.60479	1	1	67.4662	67.4348
1661	126	sp|P36871|PGM1_HUMAN	DLEALMFDR	iTRAQ8plex@N-term		1412.73	1	99	9	4.51734	1	3	68.386	68.4524
1662	126	sp|P36871|PGM1_HUMAN	LVIGQNGILSTPAVSCIIR	iTRAQ8plex@N-term; Deamidated(N)@6; Methylthio(C)@16		2304.29	3	99	12	4.2639	1	3	81.215	81.2386
1663	126	sp|P36871|PGM1_HUMAN	SIFDFSALK	iTRAQ8plex@N-term; iTRAQ8plex(K)@9		1634.95	2	99	12	4.65585	1	2	70.1644	70.1511
1664	126	sp|P36871|PGM1_HUMAN	SIFDFSALKELLSGPNR	iTRAQ8plex@N-term; iTRAQ8plex(K)@9	missed K-E@9	2501.41	3	99	8	4.80442	1	7	82.5329	82.4262
1665	126	sp|P36871|PGM1_HUMAN	YDYEEVEAEGANK	iTRAQ8plex@N-term; iTRAQ8plex(K)@13		2124.05	2	99	12	3.58906	1	1	53.7162	53.6765
1666	127	sp|Q16851|UGPA_HUMAN	GLPDNISSVLNK	iTRAQ8plex@N-term; iTRAQ8plex(K)@12		1864.09	2	99	12	4.61683	1	4	64.2357	64.1715
1667	127	sp|Q16851|UGPA_HUMAN	GTVIIIANHGDR	iTRAQ8plex@N-term		1568.89	1	99	13	3.61469	1	3	49.3628	49.378
1668	127	sp|Q16851|UGPA_HUMAN	IFNTNNLWISLAAVK	iTRAQ8plex@N-term; iTRAQ8plex(K)@15		2311.35	2	99	9	4.2389	1	1	81.2189	81.193
1669	127	sp|Q16851|UGPA_HUMAN	NENTFLDLTVQQIEHLNK	iTRAQ8plex@N-term; iTRAQ8plex(K)@18		2763.5	2	99	9	4.36883	1	1	75.4708	75.4944
1670	127	sp|Q16851|UGPA_HUMAN	TLDGGLNVIQLETAVGAAIK	iTRAQ8plex@N-term; iTRAQ8plex(K)@20		2590.52	2	99	11	4.07096	1	2	81.1255	81.1374
1671	128	sp|P50995|ANX11_HUMAN	AHLVAVFNEYQR	iTRAQ8plex@N-term		1749.95	1	99	10	4.202	1	2	60.0364	60.0993
1672	128	sp|P50995|ANX11_HUMAN	EMSGDLEEGMLAVVK	iTRAQ8plex@N-term; iTRAQ8plex(K)@15		2215.17	2	99	9	4.29378	1	3	69.2012	69.1296
1673	128	sp|P50995|ANX11_HUMAN	GFGTDEQAIIDCLGSR	iTRAQ8plex@N-term; Methylthio(C)@12		2030.97	2	99	10	4.73945	1	5	76.3512	76.4214
1674	128	sp|P50995|ANX11_HUMAN	GTITDAPGFDPLR	iTRAQ8plex@N-term		1662.89	1	99	10	3.04805	1	2	61.0207	60.9988
1675	128	sp|P50995|ANX11_HUMAN	GTITDAPGFDPLRDAEVLR	iTRAQ8plex@N-term	missed R-D@13	2346.25	2	99	13	4.72913	1	1	66.4568	66.4266
1676	129	sp|Q14974|IMB1_HUMAN	AAVENLPTFLVELSR	iTRAQ8plex@N-term		1962.11	1	99	13	5.14637	1	10	79.9319	80.0947
1677	129	sp|Q14974|IMB1_HUMAN	GALQYLVPILTQTLTK	iTRAQ8plex@N-term; iTRAQ8plex(K)@16		2366.44	2	99	16	5.14131	0.873704	26	85.4335	85.2722
1678	129	sp|Q14974|IMB1_HUMAN	GALQYLVPILTQTLTK	iTRAQ8plex@N-term; Deamidated(Q)@12; iTRAQ8plex(K)@16		2367.42	3	99	12	4.30133	0.126296	1	84.9269	85.0737
1679	129	sp|Q14974|IMB1_HUMAN	IQFNDLQSLLCATLQNVLR	iTRAQ8plex@N-term; Methylthio(C)@11		2538.36	2	99	10	4.48806	1	1	98.0885	98.0636
1680	129	sp|Q14974|IMB1_HUMAN	SNEILTAIIQGMR	iTRAQ8plex@N-term		1748.98	1	99	11	4.56456	1	12	80.6107	80.6019
1681	129	sp|Q14974|IMB1_HUMAN	SSAYESLMEIVK	iTRAQ8plex@N-term; iTRAQ8plex(K)@12		1964.07	2	97.58	7	3.48001	1	1	69.9183	69.8964
1682	130	sp|Q13576|IQGA2_HUMAN	ENIWSASEELLLR	iTRAQ8plex@N-term		1863	1	99	11	4.64454	1	5	76.047	76.0172
1683	130	sp|Q13576|IQGA2_HUMAN	GIAEQTVVTLR	iTRAQ8plex@N-term		1489.88	1	98.8	9	3.95909	1	2	56.6481	56.655
1684	130	sp|Q13576|IQGA2_HUMAN	NPNAVLTLVDDNLAPEYQK	iTRAQ8plex@N-term; iTRAQ8plex(K)@19		2721.48	2	99	8	4.37544	1	1	72.9103	72.8935
1685	130	sp|Q13576|IQGA2_HUMAN	TLETYQQLFYLLQTNPLYLAK	iTRAQ8plex@N-term; iTRAQ8plex(K)@21		3167.77	2	99	11	4.16301	0.808611	2	90.3185	90.3388
1686	130	sp|Q13576|IQGA2_HUMAN	TLETYQQLFYLLQTNPLYLAK	iTRAQ8plex@N-term; Deamidated(N)@15; iTRAQ8plex(K)@21		3168.76	3	99	9	3.53719	0.191389	1	90.3302	90.3388
1687	130	sp|Q13576|IQGA2_HUMAN	VNVNLLIYLLNK	iTRAQ8plex@N-term; iTRAQ8plex(K)@12		2023.27	2	99	11	4.46268	1	3	83.1182	83.1019
1688	131	sp|P05089|ARGI1_HUMAN	DYGDLPFADIPNDSPFQIVK	iTRAQ8plex@N-term; Deamidated(Q)@17; iTRAQ8plex(K)@20		2859.48	3	99	12	4.5079	1	2	77.1875	77.1659
1689	131	sp|P05089|ARGI1_HUMAN	IPDVPGFSWVTPCISAK	iTRAQ8plex@N-term; Methylthio(C)@13; iTRAQ8plex(K)@17		2470.32	3	99	11	4.45676	1	3	81.5761	81.55
1690	131	sp|P05089|ARGI1_HUMAN	TGLLSGLDIMEVNPSLGK	iTRAQ8plex@N-term; iTRAQ8plex(K)@18		2451.39	2	99	13	4.30374	1	9	78.185	78.1542
1691	131	sp|P05089|ARGI1_HUMAN	VMEETLSYLLGR	iTRAQ8plex@N-term		1713.93	1	99	11	5.06394	1	35	84.3921	84.3573
1692	132	sp|P60900|PSA6_HUMAN	ILTEAEIDAHLVALAERD	iTRAQ8plex@N-term	missed R-D@17	2282.24	2	99	20	4.89609	1	7	76.7534	76.7736
1693	132	sp|P60900|PSA6_HUMAN	ITENIGCVMTGMTADSR	iTRAQ8plex@N-term; Methylthio(C)@7		2148	2	99	13		0	3	72.3759	72.3412
1694	132	sp|P60900|PSA6_HUMAN	ITENIGCVMTGMTADSR	iTRAQ8plex@N-term; Deamidated(N)@4; Methylthio(C)@7		2148.98	3	99	13	4.44942	1	1	71.1906	71.2142
1695	132	sp|P60900|PSA6_HUMAN	LYQVEYAFK	iTRAQ8plex@N-term; iTRAQ8plex(K)@9		1768	2	99	8	4.4188	1	1	67.6556	67.6791
1696	132	sp|P60900|PSA6_HUMAN	YGYEIPVDMLCK	iTRAQ8plex@N-term; Methylthio(C)@11; iTRAQ8plex(K)@12		2084.06	3	99	9	5.20077	1	6	74.3297	74.2635
1697	133	sp|O75923|DYSF_HUMAN	ALAEEPQNSLPDIVIWMLQGDK	iTRAQ8plex@N-term; iTRAQ8plex(K)@22		3074.66	2	99	10	4.27175	1	1	88.6282	88.5988
1698	133	sp|O75923|DYSF_HUMAN	LGHSELPAALEQAEDWLLR	iTRAQ8plex@N-term		2451.31	1	99	18	5.15589	1	12	80.4836	80.5439
1699	133	sp|O75923|DYSF_HUMAN	LQMWVDLFPK	iTRAQ8plex@N-term; iTRAQ8plex(K)@10		1884.08	2	99	8	4.60799	1	5	81.7198	81.707
1700	133	sp|O75923|DYSF_HUMAN	VYDTQLENVEAFEGLSDFCNTFK	iTRAQ8plex@N-term; Methylthio(C)@19; iTRAQ8plex(K)@23		3322.6	3	99	10	4.30311	1	1	89.7242	89.689
1701	134	sp|O95336|6PGL_HUMAN	ELPAAVAPAGPASLAR	iTRAQ8plex@N-term		1794.03	1	98.74	9	4.18957	1	1	58.559	58.5793
1702	134	sp|O95336|6PGL_HUMAN	FALGLSGGSLVSMLAR	iTRAQ8plex@N-term		1882.07	1	99	14	4.85587	1	6	81.6005	81.6721
1703	134	sp|O95336|6PGL_HUMAN	LCWFLDEAAAR	iTRAQ8plex@N-term; Methylthio(C)@2		1643.81	2	99	11	4.6584	1	9	85.7747	85.7218
1704	134	sp|O95336|6PGL_HUMAN	LPIPESQVITINPELPVEEAAEDYAK	iTRAQ8plex@N-term; iTRAQ8plex(K)@26		3472.88	2	99	10	3.68494	1	5	78.4955	78.5007
1705	134	sp|O95336|6PGL_HUMAN	TVIFVATGEGK	iTRAQ8plex@N-term; iTRAQ8plex(K)@11		1729.02	2	99	11	4.41379	1	4	58.1623	58.2303
1706	135	sp|P07359|GP1BA_HUMAN	AWLLFLR	iTRAQ8plex@N-term		1221.75	1	99	9	5.21902	1	2	76.9413	76.9632
1707	135	sp|P07359|GP1BA_HUMAN	GLGELQELYLK	iTRAQ8plex@N-term; iTRAQ8plex(K)@11		1870.1	2	99	11	5.42838	1	2	68.1286	67.9293
1708	135	sp|P07359|GP1BA_HUMAN	LTSLPLGALR	iTRAQ8plex@N-term		1343.84	1	97.56	6	4.23393	1	5	67.6018	67.5935
1709	135	sp|P07359|GP1BA_HUMAN	VASHLEVNCDKR	iTRAQ8plex@N-term; Methylthio(C)@9; iTRAQ8plex(K)@11	missed K-R@11	2024.08	4	98.92	12	3.99189	1	3	51.0431	51.0483
1710	135	sp|P07359|GP1BA_HUMAN	WLQDNAENVYVWK	iTRAQ8plex@N-term; iTRAQ8plex(K)@13		2272.21	2	99	12	4.97524	1	7	68.8057	68.8746
1711	136	sp|P27824|CALX_HUMAN	APVPTGEVYFADSFDR	iTRAQ8plex@N-term		2074.03	1	99	12	4.39429	1	5	66.0299	65.9921
1712	136	sp|P27824|CALX_HUMAN	IPDEEATKPEGWLDDEPEYVPDPDAEKPEDWDEDMDGEWEAPQIANPR	iTRAQ8plex@N-term; iTRAQ8plex(K)@8; iTRAQ8plex(K)@27		6477.01	3	99	12	4.6661	1	3	71.5737	71.5822
1713	136	sp|P27824|CALX_HUMAN	IVDDWANDGWGLK	iTRAQ8plex@N-term; iTRAQ8plex(K)@13		2096.12	2	99	13	5.2064	0.750115	11	70.7486	70.8626
1714	136	sp|P27824|CALX_HUMAN	IVDDWANDGWGLK	iTRAQ8plex@N-term; Deamidated(N)@7; iTRAQ8plex(K)@13		2097.1	3	99	11	4.72901	0.249885	7	70.2552	70.1849
1715	136	sp|P27824|CALX_HUMAN	KIPNPDFFEDLEPFR	iTRAQ8plex@N-term; iTRAQ8plex(K)@1	missed K-I@1	2471.33	3	99	12	5.37541	1	21	71.6586	71.7173
1716	137	sp|P25787|PSA2_HUMAN	ESFEGQMTEDNIEVGICNEAGFR	iTRAQ8plex@N-term; Methylthio(C)@17		2924.29	2	99	13	4.71883	1	1	76.3111	76.2733
1717	137	sp|P25787|PSA2_HUMAN	KLAQQYYLVYQEPIPTAQLVQR	iTRAQ8plex@N-term; iTRAQ8plex(K)@1; Deamidated(Q)@11	missed K-L@1	3257.83	4	99	12	4.27788	1	1	66.342	66.307
1718	137	sp|P25787|PSA2_HUMAN	LAQQYYLVYQEPIPTAQLVQR	iTRAQ8plex@N-term		2824.54	1	99	17	4.30812	1	1	71.7571	71.7173
1719	137	sp|P25787|PSA2_HUMAN	LVQIEYALAAVAGGAPSVGIK	iTRAQ8plex@N-term; iTRAQ8plex(K)@21		2634.56	2	99	19	4.80577	1	11	88.4696	88.4765
1720	137	sp|P25787|PSA2_HUMAN	YNEDLELEDAIHTAILTLK	iTRAQ8plex@N-term; iTRAQ8plex(K)@19		2808.54	2	99	15	5.0554	1	5	82.4198	82.5348
1721	138	sp|P20618|PSB1_HUMAN	AGGSASAMLQPLLDNQVGFK	iTRAQ8plex@N-term; iTRAQ8plex(K)@20		2611.43	2	99	18	4.73884	1	6	70.9894	70.9528
1722	138	sp|P20618|PSB1_HUMAN	AMTTGAIAAMLSTILYSR	iTRAQ8plex@N-term		2174.17	1	99	20	5.07778	0.946051	6	92.5532	92.6712
1723	138	sp|P20618|PSB1_HUMAN	AMTTGAIAAMLSTILYSR	iTRAQ8plex@N-term; Oxidation(M)@2		2190.17	2	99	9	3.83385	0.0539491	2	90.6423	90.6185
1724	138	sp|P20618|PSB1_HUMAN	FFPYYVYNIIGGLDEEGK	iTRAQ8plex@N-term; iTRAQ8plex(K)@18		2731.44	2	99	9	4.38949	1	4	88.4035	88.3877
1725	138	sp|P20618|PSB1_HUMAN	RFFPYYVYNIIGGLDEEGK	iTRAQ8plex@N-term; iTRAQ8plex(K)@19	missed R-F@1	2887.54	3	99	12	4.4479	1	5	79.7404	79.7589
1726	139	sp|P61160|ARP2_HUMAN	DLMVGDEASELR	iTRAQ8plex@N-term		1637.82	1	99	12	4.39389	1	9	58.5577	58.5646
1727	139	sp|P61160|ARP2_HUMAN	HMVFLGGAVLADIMK	iTRAQ8plex@N-term; iTRAQ8plex(K)@15		2209.26	2	99	10	4.35744	1	1	74.9862	74.9771
1728	139	sp|P61160|ARP2_HUMAN	LCYVGYNIEQEQK	iTRAQ8plex@N-term; Methylthio(C)@2; iTRAQ8plex(K)@13		2240.14	3	99	13	4.62906	1	6	67.375	67.3836
1729	139	sp|P61160|ARP2_HUMAN	VGNIEIK	iTRAQ8plex@N-term; iTRAQ8plex(K)@7		1379.86	2	99	7	3.51654	1	4	53.4273	53.5013
1730	140	sp|P43304|GPDM_HUMAN	LAFLNVQAAEEALPR	iTRAQ8plex@N-term		1945.09	1	99	11	4.18517	1	5	75.4957	75.5209
1731	140	sp|P43304|GPDM_HUMAN	LVQDYGLESEVAQHLAATYGDK	iTRAQ8plex@N-term; iTRAQ8plex(K)@22		3014.58	2	99	12	4.5739	1	2	71.4286	71.4922
1732	140	sp|P43304|GPDM_HUMAN	LVSEFPYIEAEVK	iTRAQ8plex@N-term; iTRAQ8plex(K)@13		2131.2	2	99	9	4.63341	1	3	72.0184	71.9869
1733	140	sp|P43304|GPDM_HUMAN	VIFFLPWQK	iTRAQ8plex@N-term; iTRAQ8plex(K)@9		1785.08	2	99	9	4.60369	1	4	78.745	78.8205
1734	141	sp|P30520|PURA2_HUMAN	FIEDELQIPVK	iTRAQ8plex@N-term; iTRAQ8plex(K)@11		1938.13	2	99	9	4.95319	1	1	69.1134	69.0046
1735	141	sp|P30520|PURA2_HUMAN	LDILDMFTEIK	iTRAQ8plex@N-term; iTRAQ8plex(K)@11		1945.11	2	99	10	4.33891	1	8	85.9578	86.0363
1736	141	sp|P30520|PURA2_HUMAN	MCDLVSDFDGFSER	iTRAQ8plex@N-term; Methylthio(C)@2		1969.85	2	99	11	5.273	1	14	82.6652	82.7423
1737	141	sp|P30520|PURA2_HUMAN	VVDLLAQDADIVCR	iTRAQ8plex@N-term; Methylthio(C)@13		1878.98	2	99	8	4.28655	1	1	86.405	86.5264
1738	142	sp|P23368|MAOM_HUMAN	GMAFTLQER	iTRAQ8plex@N-term		1355.72	1	97.98	7	3.92773	1	1	56.5935	56.6755
1739	142	sp|P23368|MAOM_HUMAN	ILGLGDLGVYGMGIPVGK	iTRAQ8plex@N-term; iTRAQ8plex(K)@18		2366.39	2	99	15	4.7786	1	10	80.0297	80.0051
1740	142	sp|P23368|MAOM_HUMAN	TQQYDDLIDEFMK	iTRAQ8plex@N-term; iTRAQ8plex(K)@13		2253.14	2	98.79	9	4.39789	1	2	74.5158	74.492
1741	142	sp|P23368|MAOM_HUMAN	YCTFNDDIQGTAAVALAGLLAAQK	iTRAQ8plex@N-term; Methylthio(C)@2; iTRAQ8plex(K)@24		3107.62	3	99	10	4.28194	1	4	89.3903	89.3608
1742	143	sp|P10768|ESTD_HUMAN	DDQFLLDGQLLPDNFIAACTEK	iTRAQ8plex@N-term; Methylthio(C)@19; iTRAQ8plex(K)@22		3119.58	3	99	16	4.59625	0.810681	3	86.5491	86.5264
1743	143	sp|P10768|ESTD_HUMAN	DDQFLLDGQLLPDNFIAACTEK	iTRAQ8plex@N-term; Deamidated(Q)@9; Methylthio(C)@19; iTRAQ8plex(K)@22		3120.56	4	99	10	3.96459	0.189319	1	87.655	87.6176
1744	143	sp|P10768|ESTD_HUMAN	MYSYVTEELPQLINANFPVDPQR	iTRAQ8plex@N-term		3027.53	1	99	17	4.79671	0.819258	16	87.3157	87.2335
1745	143	sp|P10768|ESTD_HUMAN	MYSYVTEELPQLINANFPVDPQR	iTRAQ8plex@N-term; Deamidated(N)@14		3028.52	2	99	13	4.14035	0.180742	2	84.7226	84.773
1746	143	sp|P10768|ESTD_HUMAN	SVSAFAPICNPVLCPWGK	iTRAQ8plex@N-term; Methylthio(C)@9; Methylthio(C)@14; iTRAQ8plex(K)@18		2588.32	4	99	17	5.08126	1	6	83.9879	83.953
1747	143	sp|P10768|ESTD_HUMAN	SYPGSQLDILIDQGKDDQFLLDGQLLPDNFIAACTEK	iTRAQ8plex@N-term; iTRAQ8plex(K)@15; Methylthio(C)@34; iTRAQ8plex(K)@37	missed K-D@15	5038.61	5	99	12	4.18721	1	2	88.7308	88.7012
1748	144	sp|P09211|GSTP1_HUMAN	ALPGQLKPFETLLSQNQGGK	iTRAQ8plex@N-term; iTRAQ8plex(K)@7; iTRAQ8plex(K)@20		3037.77	3	99	15	5.14109	1	11	67.7	67.6602
1749	144	sp|P09211|GSTP1_HUMAN	DQQEAALVDMVNDGVEDLR	iTRAQ8plex@N-term		2420.18	1	99	19	5.03018	1	6	77.6919	77.7088
1750	144	sp|P09211|GSTP1_HUMAN	FQDGDLTLYQSNTILR	iTRAQ8plex@N-term		2187.15	1	99	18	5.38067	0.846383	6	68.119	68.1809
1751	144	sp|P09211|GSTP1_HUMAN	FQDGDLTLYQSNTILR	iTRAQ8plex@N-term; Deamidated(N)@12		2188.13	2	99	15	4.63955	0.153617	2	67.9539	67.9237
1752	145	sp|P23284|PPIB_HUMAN	DTNGSQFFITTVK	iTRAQ8plex@N-term; Deamidated(N)@3; iTRAQ8plex(K)@13		2066.11	3	99	14	4.45579	1	1	63.3535	63.2733
1753	145	sp|P23284|PPIB_HUMAN	IEVEKPFAIAK	iTRAQ8plex@N-term; iTRAQ8plex(K)@5; iTRAQ8plex(K)@11		2156.33	3	97.62	10	4.34074	1	2	59.0557	59.0337
1754	145	sp|P23284|PPIB_HUMAN	TVDNFVALATGEK	iTRAQ8plex@N-term; iTRAQ8plex(K)@13		1972.11	2	99	10	4.78357	1	5	67.8118	67.7362
1755	145	sp|P23284|PPIB_HUMAN	VIFGLFGK	iTRAQ8plex@N-term; iTRAQ8plex(K)@8		1487.93	2	99	11	4.63275	1	17	72.5447	72.6127
1756	146	sp|P62258|1433E_HUMAN	AAFDDAIAELDTLSEESYK	iTRAQ8plex@N-term; iTRAQ8plex(K)@19		2695.37	2	99	8	5.24218	1	13	81.1035	80.9476
1757	146	sp|P62258|1433E_HUMAN	LICCDILDVLDK	iTRAQ8plex@N-term; Methylthio(C)@3; Methylthio(C)@4; iTRAQ8plex(K)@12		2062.08	4	99	9	4.34034	1	7	94.0552	94.2182
1758	146	sp|P62258|1433E_HUMAN	VAGMDVELTVEER	iTRAQ8plex@N-term		1750.91	1	99	12	4.36144	1	6	62.1033	62.1302
1759	146	sp|P62258|1433E_HUMAN	YDEMVESMK	iTRAQ8plex@N-term; iTRAQ8plex(K)@9		1738.87	2	99	9	4.40478	1	5	59.3699	59.309
1760	147	sp|P22392|NDKB_HUMAN	EISLWFKPEELVDYK	iTRAQ8plex@N-term; iTRAQ8plex(K)@7; iTRAQ8plex(K)@15		2807.59	3	99	11	5.1806	1	13	73.1728	72.9688
1761	147	sp|P22392|NDKB_HUMAN	GDFCIQVGR	iTRAQ8plex@N-term; Methylthio(C)@4		1343.66	2	99	8	4.50736	1	9	60.9485	61.0741
1762	147	sp|P22392|NDKB_HUMAN	GLVGEIIK	iTRAQ8plex@N-term; iTRAQ8plex(K)@8		1435.92	2	99	9	4.81492	1	6	59.1324	59.2083
1763	147	sp|P22392|NDKB_HUMAN	TFIAIKPDGVQR	iTRAQ8plex@N-term; iTRAQ8plex(K)@6		1952.17	2	99	11	4.18498	1	7	55.2365	55.2225
1764	148	sp|P32320|CDD_HUMAN	AIAIASDMQDDFISPCGACR	iTRAQ8plex@N-term; Methylthio(C)@16; Methylthio(C)@19		2479.1	3	99	16	5.3935	0.670872	27	82.8727	83.0123
1765	148	sp|P32320|CDD_HUMAN	AIAIASDMQDDFISPCGACR	iTRAQ8plex@N-term; Deamidated(Q)@9; Methylthio(C)@16; Methylthio(C)@19		2480.08	4	99	18	5.08423	0.329128	3	83.3709	83.5193
1766	148	sp|P32320|CDD_HUMAN	EFGTNWPVYMTKPDGTYIVMTVQELLPSSFGPEDLQK	iTRAQ8plex@N-term; iTRAQ8plex(K)@12; iTRAQ8plex(K)@37		5129.65	3	99	13	4.62257	0.357832	2	88.953	88.8347
1767	148	sp|P32320|CDD_HUMAN	EFGTNWPVYMTKPDGTYIVMTVQELLPSSFGPEDLQK	iTRAQ8plex@N-term; iTRAQ8plex(K)@12; Deamidated(Q)@23; iTRAQ8plex(K)@37		5130.64	4	99	13	4.87654	0.642168	3	88.4558	88.5539
1768	148	sp|P32320|CDD_HUMAN	GCNIENACYPLGICAER	iTRAQ8plex@N-term; Methylthio(C)@2; Methylthio(C)@8; Methylthio(C)@14		2266.96	4	99	18	5.56838	0.866715	10	81.7017	81.807
1769	148	sp|P32320|CDD_HUMAN	GCNIENACYPLGICAER	iTRAQ8plex@N-term; Methylthio(C)@2; Deamidated(N)@6; Methylthio(C)@8; Methylthio(C)@14		2267.95	5	99	17	4.75529	0.133285	24	79.7351	79.7114
1770	148	sp|P32320|CDD_HUMAN	SAYCPYSHFPVGAALLTQEGR	iTRAQ8plex@N-term; Methylthio(C)@4		2616.28	2	99	12	4.44646	1	4	69.0236	69.0002
1771	149	sp|P19367|HXK1_HUMAN	GAAMVTAVAYR	iTRAQ8plex@N-term		1412.78	1	99	10	3.96881	1	2	56.0052	55.9897
1772	149	sp|P19367|HXK1_HUMAN	LSDETLIDIMTR	iTRAQ8plex@N-term		1709.92	1	99	11	4.47462	1	3	73.918	73.9051
1773	149	sp|P19367|HXK1_HUMAN	MCINTEWGAFGDDGSLEDIR	iTRAQ8plex@N-term; Methylthio(C)@2		2578.14	2	99	11	4.20107	1	1	76.4315	76.3996
1774	149	sp|P19367|HXK1_HUMAN	SANLVAATLGAILNR	iTRAQ8plex@N-term		1787.06	1	99	9	4.38778	1	11	83.9344	83.953
1775	150	sp|P48595|SPB10_HUMAN	AFVEINEQGTEAAAGSGSEIDIR	iTRAQ8plex@N-term		2667.33	1	99	15	4.43591	1	3	64.4785	64.4391
1776	150	sp|P48595|SPB10_HUMAN	GTTAAQMAQVLQFNR	iTRAQ8plex@N-term		1939.03	1	99	14	4.6895	1	5	65.7343	65.7932
1777	150	sp|P48595|SPB10_HUMAN	MILVNALYFK	iTRAQ8plex@N-term; iTRAQ8plex(K)@10		1819.09	2	99	8	4.18503	1	3	74.9515	74.9388
1778	150	sp|P48595|SPB10_HUMAN	STLSSMGMSDAFSQSK	iTRAQ8plex@N-term; iTRAQ8plex(K)@16		2271.13	2	99	14	4.25113	1	2	60.751	60.7596
1779	151	sp|P51149|RAB7A_HUMAN	DPENFPFVVLGNK	iTRAQ8plex@N-term; iTRAQ8plex(K)@13		2083.16	2	99	12	4.79602	1	10	69.4443	69.4162
1780	151	sp|P51149|RAB7A_HUMAN	EAINVEQAFQTIAR	iTRAQ8plex@N-term		1893.03	1	99	11	4.24022	1	1	71.3722	71.3542
1781	151	sp|P51149|RAB7A_HUMAN	GADCCVLVFDVTAPNTFK	iTRAQ8plex@N-term; Methylthio(C)@4; Methylthio(C)@5; iTRAQ8plex(K)@18		2599.28	4	99	8	3.97327	1	1	87.595	87.5652
1782	151	sp|P51149|RAB7A_HUMAN	LVTMQIWDTAGQER	iTRAQ8plex@N-term		1951.01	1	99	13	5.09001	1	6	68.4046	68.4681
1783	152	sp|P04839|CY24B_HUMAN	IGVFLCGPEALAETLSK	iTRAQ8plex@N-term; Methylthio(C)@6; iTRAQ8plex(K)@17		2401.32	3	99	19	5.37532	1	37	89.48	89.3674
1784	152	sp|P04839|CY24B_HUMAN	IVGDWTEGLFNACGCDK	iTRAQ8plex@N-term; Methylthio(C)@13; Methylthio(C)@15; iTRAQ8plex(K)@17		2527.18	4	99	16	4.79244	0.782847	18	88.5092	88.5212
1785	152	sp|P04839|CY24B_HUMAN	IVGDWTEGLFNACGCDK	iTRAQ8plex@N-term; Deamidated(N)@11; Methylthio(C)@13; Methylthio(C)@15; iTRAQ8plex(K)@17		2528.17	5	99	10	4.23553	0.217153	3	83.4027	83.4162
1786	152	sp|P04839|CY24B_HUMAN	NLLSFLR	iTRAQ8plex@N-term		1165.71	1	99	7	4.45714	1	2	68.9364	68.8746
1787	153	sp|P14625|ENPL_HUMAN	EFEPLLNWMK	iTRAQ8plex@N-term; iTRAQ8plex(K)@10		1914.05	2	99	11	4.70907	1	7	77.6357	77.7088
1788	153	sp|P14625|ENPL_HUMAN	FAFQAEVNR	iTRAQ8plex@N-term		1384.74	1	99	9	4.52303	1	12	56.4232	56.4967
1789	153	sp|P14625|ENPL_HUMAN	GLFDEYGSK	iTRAQ8plex@N-term; iTRAQ8plex(K)@9		1622.88	2	99	10	3.09202	1	2	56.2922	56.3158
1790	153	sp|P14625|ENPL_HUMAN	VFITDDFHDMMPK	iTRAQ8plex@N-term; iTRAQ8plex(K)@13		2203.13	2	99	12	4.61869	1	1	67.1399	67.1116
1791	154	sp|O75368|SH3L1_HUMAN	ENNAVYAFLGLTAPPGSK	iTRAQ8plex@N-term; iTRAQ8plex(K)@18		2456.35	2	99	15	4.87724	0.77755	8	74.5123	74.5701
1792	154	sp|O75368|SH3L1_HUMAN	ENNAVYAFLGLTAPPGSK	iTRAQ8plex@N-term; Deamidated(N)@2; iTRAQ8plex(K)@18		2457.34	3	99	10	4.33375	0.22245	3	73.9639	73.842
1793	154	sp|O75368|SH3L1_HUMAN	GDYDAFFEAR	iTRAQ8plex@N-term		1493.71	1	99	15	4.6054	1	7	62.0075	62.0145
1794	154	sp|O75368|SH3L1_HUMAN	QQDVLGFLEANK	iTRAQ8plex@N-term; iTRAQ8plex(K)@12		1969.11	2	99	10	4.83606	1	3	68.7562	68.6877
1795	154	sp|O75368|SH3L1_HUMAN	VYIASSSGSTAIK	iTRAQ8plex@N-term; iTRAQ8plex(K)@13		1891.09	2	99	13	2.97267	1	3	54.6676	54.6316
1796	155	sp|O00764|PDXK_HUMAN	GQVLNSDELQELYEGLR	iTRAQ8plex@N-term		2266.17	1	99	19	4.93712	0.774487	7	74.3314	74.393
1797	155	sp|O00764|PDXK_HUMAN	GQVLNSDELQELYEGLR	iTRAQ8plex@N-term; Deamidated(N)@5		2267.16	2	99	11	4.40128	0.225513	2	73.8998	73.9051
1798	155	sp|O00764|PDXK_HUMAN	LVYVCDPVLGDK	iTRAQ8plex@N-term; Methylthio(C)@5; iTRAQ8plex(K)@12		1974.08	3	99	10	4.55245	1	2	75.3549	75.3418
1799	155	sp|O00764|PDXK_HUMAN	LVYVCDPVLGDKWDGEGSMYVPEDLLPVYK	iTRAQ8plex@N-term; Methylthio(C)@5; iTRAQ8plex(K)@12; iTRAQ8plex(K)@30	missed K-W@12	4357.25	5	99	10	4.35395	1	1	86.2952	86.2556
1800	155	sp|O00764|PDXK_HUMAN	VVPLADIITPNQFEAELLSGR	iTRAQ8plex@N-term		2585.44	1	99	12	4.90433	0.6918	21	85.6894	85.8059
1801	155	sp|O00764|PDXK_HUMAN	VVPLADIITPNQFEAELLSGR	iTRAQ8plex@N-term; Deamidated(N)@11		2586.42	2	99	15	4.55318	0.3082	5	82.9107	82.9227
1802	156	sp|O75594|PGRP_HUMAN	AAQGLLACGVAQGALR	iTRAQ8plex@N-term; Methylthio(C)@8		1848	2	99	15	5.2023	1	11	69.6232	69.7827
1803	156	sp|O75594|PGRP_HUMAN	ALASECAQHLSLPLR	iTRAQ8plex@N-term; Methylthio(C)@6		1958.04	2	99	16	4.94746	1	3	68.7829	68.7155
1804	156	sp|O75594|PGRP_HUMAN	TLGWCDVGYNFLIGEDGLVYEGR	iTRAQ8plex@N-term; Methylthio(C)@5		2925.4	2	99	22	4.63516	0.838767	7	90.5475	90.6034
1805	156	sp|O75594|PGRP_HUMAN	TLGWCDVGYNFLIGEDGLVYEGR	iTRAQ8plex@N-term; Methylthio(C)@5; Deamidated(N)@10		2926.38	3	99	15	3.91897	0.161233	1	91.2508	91.2611
1806	156	sp|O75594|PGRP_HUMAN	TLSPGNQLYHLIQNWPHYR	iTRAQ8plex@N-term		2640.39	1	99	13	5.04804	1	3	70.0275	70.0494
1807	157	sp|P19971|TYPH_HUMAN	ALPLALVLHELGAGR	iTRAQ8plex@N-term		1833.11	1	99	13	4.94874	1	6	81.0154	80.957
1808	157	sp|P19971|TYPH_HUMAN	DLVTTLGGALLWLSGHAGTQAQGAAR	iTRAQ8plex@N-term		2867.56	1	99	11	3.98646	1	5	88.3204	88.3473
1809	157	sp|P19971|TYPH_HUMAN	LGVGAELLVDVGQR	iTRAQ8plex@N-term		1729	1	99	13	4.20388	1	1	72.666	72.6066
1810	157	sp|P19971|TYPH_HUMAN	TLVGVGASLGLR	iTRAQ8plex@N-term		1445.89	1	99	15	4.16658	1	2	65.082	65.1155
1811	158	sp|P13645|K1C10_HUMAN	ADLEMQIESLTEELAYLK	iTRAQ8plex@N-term; Oxidation(M)@5; iTRAQ8plex(K)@18		2719.45	3	99	14	4.7606	1	7	88.9597	88.8792
1812	158	sp|P13645|K1C10_HUMAN	NQILNLTTDNANILLQIDNAR	iTRAQ8plex@N-term		2670.46	1	99	10	3.57194	1	1	77.1106	77.0757
1813	158	sp|P13645|K1C10_HUMAN	NVQALEIELQSQLALK	iTRAQ8plex@N-term; iTRAQ8plex(K)@16		2404.42	2	99	14	4.20629	1	1	75.5487	75.4763
1814	158	sp|P13645|K1C10_HUMAN	TIDDLKNQILNLTTDNANILLQIDNAR	iTRAQ8plex@N-term; iTRAQ8plex(K)@6; Deamidated(N)@16	missed K-N@6	3661.01	4	99	12	4.31309	1	1	88.2057	88.1687
1815	159	sp|O95782|AP2A1_HUMAN	AADLLYAMCDR	iTRAQ8plex@N-term; Methylthio(C)@9		1590.75	2	99	12	4.75799	1	5	79.5439	79.5124
1816	159	sp|O95782|AP2A1_HUMAN	HLCELLAQQF	iTRAQ8plex@N-term; Methylthio(C)@3		1550.79	2	99	7	4.3035	1	1	76.883	76.8731
1817	159	sp|O95782|AP2A1_HUMAN	LVECLETVLNK	iTRAQ8plex@N-term; Methylthio(C)@4; iTRAQ8plex(K)@11		1914.08	3	99	10	4.10965	1	2	90.2591	90.2943
1818	159	sp|O95782|AP2A1_HUMAN	VGGYILGEFGNLIAGDPR	iTRAQ8plex@N-term		2151.16	1	99	8	4.24032	0.644971	1	85.1184	85.0472
1819	159	sp|O95782|AP2A1_HUMAN	VGGYILGEFGNLIAGDPR	iTRAQ8plex@N-term; Deamidated(N)@11		2152.15	2	99	10	3.98105	0.355029	1	84.877	84.8491
1820	160	sp|Q9ULV4|COR1C_HUMAN	AIFLADGNVFTTGFSR	iTRAQ8plex@N-term		2019.07	1	99	17	5.12793	1	13	74.7511	74.8265
1821	160	sp|Q9ULV4|COR1C_HUMAN	KSDLFQDDLYPDTAGPEAALEAEEWFEGK	iTRAQ8plex@N-term; iTRAQ8plex(K)@1; iTRAQ8plex(K)@29	missed K-S@1	4183.1	4	99	14	4.716	1	5	78.6057	78.6126
1822	160	sp|Q9ULV4|COR1C_HUMAN	VTWDSSFCAVNPR	iTRAQ8plex@N-term; Methylthio(C)@8		1830.87	2	99	11	4.48334	1	5	67.3051	67.3337
1823	160	sp|Q9ULV4|COR1C_HUMAN	YFEITDESPYVHYLNTFSSK	iTRAQ8plex@N-term; iTRAQ8plex(K)@20		3047.54	2	99	12	4.5418	1	1	72.4007	72.3725
1824	161	sp|P38646|GRP75_HUMAN	AQFEGIVTDLIR	iTRAQ8plex@N-term		1664.94	1	99	13	4.53354	1	9	76.7384	76.8187
1825	161	sp|P38646|GRP75_HUMAN	EQQIVIQSSGGLSK	iTRAQ8plex@N-term; iTRAQ8plex(K)@14		2081.19	2	99	11	3.78312	1	2	54.5275	54.4871
1826	161	sp|P38646|GRP75_HUMAN	LYSPSQIGAFVLMK	iTRAQ8plex@N-term; iTRAQ8plex(K)@14		2161.24	2	99	10	4.48052	1	3	74.6911	74.6679
1827	161	sp|P38646|GRP75_HUMAN	VQQTVQDLFGR	iTRAQ8plex@N-term		1593.88	1	99	11	4.49073	1	1	69.6232	69.679
1828	162	sp|P40763|STAT3_HUMAN	GLSIEQLTTLAEK	iTRAQ8plex@N-term; iTRAQ8plex(K)@13		2010.18	2	99	10	4.34939	1	1	69.9012	69.8797
1829	162	sp|P40763|STAT3_HUMAN	IVELFR	iTRAQ8plex@N-term		1079.66	1	99	8	4.98254	1	9	69.5213	69.6417
1830	162	sp|P40763|STAT3_HUMAN	MQQLEQMLTALDQMR	iTRAQ8plex@N-term		2139.08	1	99	8	4.10643	1	8	88.4728	88.4814
1831	162	sp|P40763|STAT3_HUMAN	SIVSELAGLLSAMEYVQK	iTRAQ8plex@N-term; iTRAQ8plex(K)@18		2545.43	2	99	12	4.04481	1	9	96.2636	96.2689
1832	163	sp|O00754|MA2B1_HUMAN	ATFDPDTGLLMEIMNMNQQLLLPVR	iTRAQ8plex@N-term		3163.64	1	99	17	3.66001	1	1	94.9303	94.8906
1833	163	sp|O00754|MA2B1_HUMAN	ELVDYFLNVATAQGR	iTRAQ8plex@N-term		1999.07	1	99	10	4.69177	1	6	81.457	81.4839
1834	163	sp|O00754|MA2B1_HUMAN	FQVIVYNPLGR	iTRAQ8plex@N-term		1608.93	1	99	8	4.23152	1	4	70.4804	70.5122
1835	163	sp|O00754|MA2B1_HUMAN	QLAAGWGPCEVLLSNALAR	Gln->pyro-Glu@N-term; Methylthio(C)@9		1996.99	2	99	9	4.15794	0.610223	1	98.1364	98.103
1836	163	sp|O00754|MA2B1_HUMAN	QLAAGWGPCEVLLSNALAR	iTRAQ8plex@N-term; Methylthio(C)@9		2318.22	2	99	13	3.96327	0.389777	3	89.9653	89.8918
1837	164	sp|P15121|ALDR_HUMAN	EFFPLDESGNVVPSDTNILDTWAAMEELVDEGLVK	iTRAQ8plex@N-term; iTRAQ8plex(K)@35		4487.26	2	99	9	4.23017	1	2	97.2662	97.2288
1838	164	sp|P15121|ALDR_HUMAN	FIVSK	iTRAQ8plex@N-term; iTRAQ8plex(K)@5	cleaved L-F@N-term	1200.77	3	99	4	3.95017	1	2	88.0241	88.0135
1839	164	sp|P15121|ALDR_HUMAN	MPILGLGTWK	iTRAQ8plex@N-term; iTRAQ8plex(K)@10		1723.03	2	99	11	4.52851	1	4	70.1563	70.1397
1840	164	sp|P15121|ALDR_HUMAN	VFDFELSSQDMTTLLSYNR	iTRAQ8plex@N-term		2569.27	1	99	11	4.17808	1	1	83.2453	83.1659
1841	165	sp|P13716|HEM2_HUMAN	AGADIIITYYTPQLLQWLKEE	iTRAQ8plex@N-term; iTRAQ8plex(K)@19	missed K-E@19	3072.7	3	99	12	3.8367	1	3	89.7955	89.7169
1842	165	sp|P13716|HEM2_HUMAN	AWQTATTTLNASNLIYPIFVTDVPDDIQPITSLPGVAR	iTRAQ8plex@N-term		4402.34	1	99	20	4.21091	1	3	90.2268	90.19
1843	165	sp|P13716|HEM2_HUMAN	EGADMLMVKPGMPYLDIVR	iTRAQ8plex@N-term; iTRAQ8plex(K)@9		2742.47	2	99	12	4.52799	1	3	71.515	71.5787
1844	165	sp|P13716|HEM2_HUMAN	GSAADSEESPAIEAIHLLR	iTRAQ8plex@N-term		2269.19	1	99	14	4.32558	1	1	66.1444	66.1562
1845	166	sp|P07339|CATD_HUMAN	AIGAVPLIQGEYMIPCEK	iTRAQ8plex@N-term; Methylthio(C)@16; iTRAQ8plex(K)@18		2585.39	3	99	9	4.65777	1	5	75.8762	75.9498
1846	166	sp|P07339|CATD_HUMAN	EGCEAIVDTGTSLMVGPVDEVR	iTRAQ8plex@N-term; Methylthio(C)@3		2626.26	2	99	18	4.70125	1	4	80.192	80.2039
1847	166	sp|P07339|CATD_HUMAN	ISVNNVLPVFDNLMQQK	iTRAQ8plex@N-term; iTRAQ8plex(K)@17		2566.44	2	99	12	4.72336	1	6	79.0425	79.0611
1848	166	sp|P07339|CATD_HUMAN	LVDQNIFSFYLSR	iTRAQ8plex@N-term		1905.03	1	99	10	4.82289	1	2	78.5176	78.5067
1849	167	sp|O43707|ACTN4_HUMAN	DGLAFNALIHR	iTRAQ8plex@N-term		1529.86	1	99	14	4.49971	1	3	60.6444	60.6271
1850	167	sp|O43707|ACTN4_HUMAN	GISQEQMQEFR	iTRAQ8plex@N-term		1655.82	1	99	13	3.60703	1	1	53.9773	53.9517
1851	167	sp|O43707|ACTN4_HUMAN	ICDQWDALGSLTHSR	iTRAQ8plex@N-term; Methylthio(C)@2		2050.99	2	99	11	4.56587	1	2	71.4094	71.433
1852	168	sp|Q6P4A8|PLBL1_HUMAN	GTLYIVEQIPTYVEYSEQTDVLR	iTRAQ8plex@N-term		3019.57	1	99	16	4.75913	0.34179	9	83.3628	83.2816
1853	168	sp|Q6P4A8|PLBL1_HUMAN	GTLYIVEQIPTYVEYSEQTDVLR	iTRAQ8plex@N-term; Deamidated(Q)@8		3020.55	2	99	14	5.04374	0.65821	5	83.1232	83.1917
1854	168	sp|Q6P4A8|PLBL1_HUMAN	LGLDYSYDLAPR	iTRAQ8plex@N-term		1685.89	1	99	13	4.50304	1	2	65.1321	65.1155
1855	168	sp|Q6P4A8|PLBL1_HUMAN	QVIPETLLSWQR	iTRAQ8plex@N-term		1773.01	1	99	13	4.91788	1	5	69.7423	69.7776
1856	168	sp|Q6P4A8|PLBL1_HUMAN	TTGWGILEIR	iTRAQ8plex@N-term		1448.83	1	99	12	4.8344	1	6	66.7006	66.669
1857	169	sp|P49720|PSB3_HUMAN	FGIQAQMVTTDFQK	iTRAQ8plex@N-term; iTRAQ8plex(K)@14		2221.2	2	99	13	4.46178	0.658833	3	65.5062	65.5264
1858	169	sp|P49720|PSB3_HUMAN	FGIQAQMVTTDFQK	iTRAQ8plex@N-term; Deamidated(Q)@6; iTRAQ8plex(K)@14		2222.19	3	99	14	4.17598	0.341167	2	65.5051	65.4768
1859	169	sp|P49720|PSB3_HUMAN	FGPYYTEPVIAGLDPK	iTRAQ8plex@N-term; iTRAQ8plex(K)@16		2374.3	2	99	12	4.78121	1	1	69.719	69.7275
1860	169	sp|P49720|PSB3_HUMAN	LYIGLAGLATDVQTVAQR	iTRAQ8plex@N-term		2192.25	1	99	20	5.30768	0.77592	6	81.0586	81.0821
1861	169	sp|P49720|PSB3_HUMAN	LYIGLAGLATDVQTVAQR	iTRAQ8plex@N-term; Deamidated(Q)@13		2193.23	2	99	17	4.76826	0.22408	1	81.7095	81.7727
1862	169	sp|P49720|PSB3_HUMAN	QIKPYTLMSMVANLLYEK	Gln->pyro-Glu@N-term; iTRAQ8plex(K)@3; iTRAQ8plex(K)@18		2732.51	3	99	10	4.01941	1	3	96.8336	96.8822
1863	170	sp|P02763|A1AG1_HUMAN	EQLGEFYEALDCLR	iTRAQ8plex@N-term; Methylthio(C)@12		2034.97	2	99	17	5.41828	1	6	82.3653	82.4736
1864	170	sp|P02763|A1AG1_HUMAN	SDVVYTDWK	iTRAQ8plex@N-term; iTRAQ8plex(K)@9		1719.93	2	99	10	4.17032	1	5	57.4458	57.4627
1865	170	sp|P02763|A1AG1_HUMAN	TYMLAFDVNDEK	iTRAQ8plex@N-term; iTRAQ8plex(K)@12		2053.07	2	99	11	4.33786	1	5	65.4094	65.5122
1866	170	sp|P02763|A1AG1_HUMAN	YVGGQEHFAHLLILR	iTRAQ8plex@N-term		2056.15	1	99	16	5.04739	1	6	60.7048	60.5994
1867	171	sp|P31946|1433B_HUMAN	EKIEAELQDICNDVLELLDK	iTRAQ8plex@N-term; iTRAQ8plex(K)@2; Methylthio(C)@11; Deamidated(N)@12; iTRAQ8plex(K)@20	missed K-I@2	3288.76	6	99	9	4.62278	1	2	86.2249	86.1185
1868	171	sp|P31946|1433B_HUMAN	IEAELQDICNDVLELLDK	iTRAQ8plex@N-term; Methylthio(C)@9; Deamidated(N)@10; iTRAQ8plex(K)@18		2727.42	4	99	12	4.35002	1	8	94.054	94.0843
1869	171	sp|P31946|1433B_HUMAN	TAFDEAIAELDTLNEESYK	iTRAQ8plex@N-term; iTRAQ8plex(K)@19		2766.41	2	99	15	4.9249	0.303297	1	81.1611	81.183
1870	171	sp|P31946|1433B_HUMAN	TAFDEAIAELDTLNEESYK	iTRAQ8plex@N-term; Deamidated(N)@14; iTRAQ8plex(K)@19		2767.39	3	99	15	5.28608	0.696703	2	79.1892	79.2413
1871	171	sp|P31946|1433B_HUMAN	YDDMAAAMK	iTRAQ8plex@N-term; iTRAQ8plex(K)@9		1622.83	2	99	9	3.96379	1	1	55.4644	55.4896
1872	172	sp|O75874|IDHC_HUMAN	GWPLYLSTK	iTRAQ8plex@N-term; iTRAQ8plex(K)@9		1671.98	2	98.16	9	4.30741	1	1	64.9937	64.9802
1873	172	sp|O75874|IDHC_HUMAN	IIWELIK	iTRAQ8plex@N-term; iTRAQ8plex(K)@7		1521.97	2	99	8	4.6165	1	13	75.9349	75.8811
1874	172	sp|O75874|IDHC_HUMAN	LIDDMVAQAMK	iTRAQ8plex@N-term; iTRAQ8plex(K)@11		1842.02	2	99	11	4.40817	1	5	72.6132	72.5524
1875	172	sp|O75874|IDHC_HUMAN	SDYLNTFEFMDK	iTRAQ8plex@N-term; iTRAQ8plex(K)@12		2117.06	2	99	10	4.35388	1	2	70.3459	70.451
1876	173	sp|Q15080|NCF4_HUMAN	AGDVIFLLSR	iTRAQ8plex@N-term		1393.82	1	99	12	4.50285	1	2	72.0167	72.032
1877	173	sp|Q15080|NCF4_HUMAN	GATGIFPLSFVK	iTRAQ8plex@N-term; iTRAQ8plex(K)@12		1844.1	2	99	7	3.98704	1	1	72.3626	72.3412
1878	173	sp|Q15080|NCF4_HUMAN	IFFYQSPYDSEQVPQALR	iTRAQ8plex@N-term		2491.27	1	97.94	11	4.75433	1	1	72.6912	72.6998
1879	173	sp|Q15080|NCF4_HUMAN	SLLSLPVWVLMDEDVR	iTRAQ8plex@N-term		2175.19	1	99	18	5.17782	1	13	87.7462	87.6814
1880	174	sp|Q13231|CHIT1_HUMAN	DNQWVGFDDVESFK	iTRAQ8plex@N-term; iTRAQ8plex(K)@14		2293.15	2	99	9	4.43271	1	5	67.3464	67.4229
1881	174	sp|Q13231|CHIT1_HUMAN	FTTLVQDLANAFQQEAQTSGK	iTRAQ8plex@N-term; iTRAQ8plex(K)@21		2904.54	2	99	16	4.72906	0.88685	9	92.6196	92.716
1882	174	sp|Q13231|CHIT1_HUMAN	FTTLVQDLANAFQQEAQTSGK	iTRAQ8plex@N-term; Deamidated(Q)@6; iTRAQ8plex(K)@21		2905.53	3	99	10	3.83487	0.11315	2	94.1043	94.0881
1883	174	sp|Q13231|CHIT1_HUMAN	LLLSAAVPAGQTYVDAGYEVDK	iTRAQ8plex@N-term; iTRAQ8plex(K)@22		2887.58	2	99	13	4.81726	1	9	70.2586	70.2755
1884	174	sp|Q13231|CHIT1_HUMAN	QEESGAAASLNVDAAVQQWLQK	iTRAQ8plex@N-term; iTRAQ8plex(K)@22		2950.56	2	97.94	10	4.60927	1	2	75.0355	75.0075
1885	175	sp|Q9H299|SH3L3_HUMAN	ATPPQIVNGDQYCGDYELFVEAVEQNTLQEFLK	iTRAQ8plex@N-term; Deamidated(N)@8; Methylthio(C)@13; iTRAQ8plex(K)@33		4413.16	4	99	13	4.68414	1	2	97.0245	97.0081
1886	175	sp|Q9H299|SH3L3_HUMAN	IQYQLVDISQDNALR	iTRAQ8plex@N-term		2079.13	1	99	17	4.30292	0.301588	6	67.7693	67.7746
1887	175	sp|Q9H299|SH3L3_HUMAN	IQYQLVDISQDNALR	iTRAQ8plex@N-term; Deamidated(N)@12		2080.11	2	99	15	4.66761	0.698412	3	67.5094	67.5247
1888	175	sp|Q9H299|SH3L3_HUMAN	IQYQLVDISQDNALRDEMR	iTRAQ8plex@N-term	missed R-D@15	2610.34	2	99	16	5.75442	0.934605	8	66.4326	66.4853
1889	175	sp|Q9H299|SH3L3_HUMAN	IQYQLVDISQDNALRDEMR	iTRAQ8plex@N-term; Deamidated(N)@12	missed R-D@15	2611.32	3	99	11	4.59934	0.0653955	8	67.7176	67.7245
1890	175	sp|Q9H299|SH3L3_HUMAN	VYSTSVTGSR	iTRAQ8plex@N-term		1359.73	1	98.97	10	3.52035	1	1	45.2795	45.264
1891	176	sp|Q13418|ILK_HUMAN	FDMIVPILEK	iTRAQ8plex@N-term; iTRAQ8plex(K)@10		1812.07	2	99	9	5.19989	1	6	77.1622	77.2344
1892	176	sp|Q13418|ILK_HUMAN	GMAFLHTLEPLIPR	iTRAQ8plex@N-term		1898.08	1	99	7	4.84857	1	6	74.5926	74.7131
1893	176	sp|Q13418|ILK_HUMAN	LWLDNTENDLNQGDDHGFSPLHWACR	iTRAQ8plex@N-term; Methylthio(C)@25		3402.55	2	99	15	4.41496	1	4	73.0458	73.0578
1894	176	sp|Q13418|ILK_HUMAN	SVMIDEDMTAR	iTRAQ8plex@N-term		1570.76	1	98.19	8	3.99839	1	3	55.2457	55.2069
1895	177	sp|P48444|COPD_HUMAN	DGGLQNMELHGMIMLR	iTRAQ8plex@N-term		2118.07	1	98.47	11	4.43702	1	1	66.0005	65.9298
1896	177	sp|P48444|COPD_HUMAN	LFTAESLIGLK	iTRAQ8plex@N-term; iTRAQ8plex(K)@11		1799.1	2	99	7	4.66865	1	6	76.0753	76.1525
1897	177	sp|P48444|COPD_HUMAN	NSNILEDLETLR	iTRAQ8plex@N-term		1719.93	1	99	8	3.93877	1	1	73.8243	73.8117
1898	177	sp|P48444|COPD_HUMAN	NTLEWCLPVIDAK	iTRAQ8plex@N-term; Methylthio(C)@6; iTRAQ8plex(K)@13		2155.16	3	99	12	4.45381	1	4	77.8217	77.7964
1899	178	sp|P08311|CATG_HUMAN	AQEGLRPGTLCTVAGWGR	iTRAQ8plex@N-term; Methylthio(C)@11		2221.14	2	99	14	5.30741	1	10	66.0525	66.1114
1900	178	sp|P08311|CATG_HUMAN	TIQNDIMLLQLSR	iTRAQ8plex@N-term		1848.04	1	99	15	4.92473	0.632041	11	72.4228	72.4763
1901	178	sp|P08311|CATG_HUMAN	TIQNDIMLLQLSR	iTRAQ8plex@N-term; Deamidated(N)@4		1849.03	2	99	13	4.68979	0.367959	6	69.1152	69.1001
1902	178	sp|P08311|CATG_HUMAN	VSSFLPWIR	iTRAQ8plex@N-term		1407.82	1	99	16	5.68966	1	45	78.085	78.0211
1903	179	sp|P59998|ARPC4_HUMAN	AENFFILR	iTRAQ8plex@N-term		1312.74	1	99	10	4.73458	1	7	67.3331	67.3216
1904	179	sp|P59998|ARPC4_HUMAN	ATLQAALCLENFSSQVVER	iTRAQ8plex@N-term; Methylthio(C)@8		2428.24	2	99	10	4.30986	0.528495	2	84.5937	84.5647
1905	179	sp|P59998|ARPC4_HUMAN	ATLQAALCLENFSSQVVER	iTRAQ8plex@N-term; Methylthio(C)@8; Deamidated(N)@11		2429.22	3	99	8	4.26031	0.471505	1	84.5528	84.5647
1906	179	sp|P59998|ARPC4_HUMAN	IVAEEFLK	iTRAQ8plex@N-term; iTRAQ8plex(K)@8		1555.94	2	98.4	11	4.89869	1	4	63.9514	63.985
1907	179	sp|P59998|ARPC4_HUMAN	VLIEGSINSVR	iTRAQ8plex@N-term		1489.88	1	99	12	4.43474	0.554636	6	59.3355	59.3218
1908	179	sp|P59998|ARPC4_HUMAN	VLIEGSINSVR	iTRAQ8plex@N-term; Deamidated(N)@8		1490.86	2	99	11	4.33945	0.445364	6	58.0998	58.1764
1909	180	sp|Q9NQC3|RTN4_HUMAN	AYLESEVAISEELVQK	iTRAQ8plex@N-term; iTRAQ8plex(K)@16		2415.34	2	99	15	4.67331	1	1	72.9563	72.9265
1910	180	sp|Q9NQC3|RTN4_HUMAN	GPLPAAPPVAPER	iTRAQ8plex@N-term		1574.91	1	98.34	12	4.27124	1	1	53.3887	53.453
1911	180	sp|Q9NQC3|RTN4_HUMAN	HQAQIDHYLGLANK	iTRAQ8plex@N-term; iTRAQ8plex(K)@14		2215.23	2	99	14	4.15317	1	1	55.0665	55.0851
1912	180	sp|Q9NQC3|RTN4_HUMAN	LFLVDDLVDSLK	iTRAQ8plex@N-term; iTRAQ8plex(K)@12		1984.17	2	99	9	4.09902	1	5	92.0211	92.005
1913	181	sp|Q9UMX0|UBQL1_HUMAN	EANLQALIATGGDINAAIER	iTRAQ8plex@N-term		2343.27	1	99	14	4.46593	1	6	74.9963	75.0065
1914	181	sp|Q9UMX0|UBQL1_HUMAN	FQQQLEQLSAMGFLNR	iTRAQ8plex@N-term		2213.16	1	99	10	4.22845	1	1	79.7091	79.6725
1915	181	sp|Q9UMX0|UBQL1_HUMAN	LIFAGK	iTRAQ8plex@N-term; iTRAQ8plex(K)@6	cleaved V-L@N-term	1255.81	3	98.29	7	4.36547	1	1	58.5294	58.519
1916	181	sp|Q9UMX0|UBQL1_HUMAN	SMMQSLSQNPDLAAQMMLNNPLFAGNPQLQEQMR	iTRAQ8plex@N-term		4136.99	1	99	16	4.41544	1	2	84.0496	84.0147
1917	182	sp|Q13813|SPTA2_HUMAN	ALINADELASDVAGAEALLDR	iTRAQ8plex@N-term		2430.29	1	99	20	4.95633	1	6	85.615	85.6768
1918	182	sp|Q13813|SPTA2_HUMAN	LAALADQWQFLVQK	iTRAQ8plex@N-term; iTRAQ8plex(K)@14		2238.3	2	99	15	4.5315	1	5	83.1698	83.1917
1919	182	sp|Q13813|SPTA2_HUMAN	QVEELYHSLLELGEK	Gln->pyro-Glu@N-term; iTRAQ8plex(K)@15		2073.09	2	99	9	3.96218	1	2	82.3126	82.2912
1920	183	sp|P61626|LYSC_HUMAN	GISLANWMCLAK	iTRAQ8plex@N-term; Methylthio(C)@9; iTRAQ8plex(K)@12		1960.06	3	99	11	5.17206	0.276353	31	76.6553	76.6922
1921	183	sp|P61626|LYSC_HUMAN	GISLANWMCLAK	iTRAQ8plex@N-term; Deamidated(N)@6; Methylthio(C)@9; iTRAQ8plex(K)@12		1961.04	4	99	10	5.59012	0.723647	2	77.2312	77.0306
1922	183	sp|P61626|LYSC_HUMAN	LGMDGYR	iTRAQ8plex@N-term		1114.57	1	99	11	4.30077	1	5	49.9423	50.0542
1923	183	sp|P61626|LYSC_HUMAN	STDYGIFQINSR	iTRAQ8plex@N-term		1703.88	1	99	14	4.85913	0.619513	4	59.951	59.9845
1924	183	sp|P61626|LYSC_HUMAN	STDYGIFQINSR	iTRAQ8plex@N-term; Deamidated(N)@10		1704.86	2	99	12	4.64742	0.380487	6	62.7541	62.7759
1925	183	sp|P61626|LYSC_HUMAN	YWCNDGK	iTRAQ8plex@N-term; Methylthio(C)@3; iTRAQ8plex(K)@7		1538.75	3	98.31	9	4.52194	0.597811	2	55.1919	55.2678
1926	183	sp|P61626|LYSC_HUMAN	YWCNDGK	iTRAQ8plex@N-term; Methylthio(C)@3; Deamidated(N)@4; iTRAQ8plex(K)@7		1539.73	4	98.21	10	4.3498	0.402189	2	56.7186	56.7004
1927	184	sp|Q96G03|PGM2_HUMAN	EGFHFEETLTGFK	iTRAQ8plex@N-term; iTRAQ8plex(K)@13		2149.13	2	98.81	12	4.81606	1	9	63.5165	63.5832
1928	184	sp|Q96G03|PGM2_HUMAN	ELNELVSAIEEHFFQPQK	iTRAQ8plex@N-term; iTRAQ8plex(K)@18		2765.48	2	99	14	5.22762	1	9	87.6511	87.6814
1929	184	sp|Q96G03|PGM2_HUMAN	GIVISFDAR	iTRAQ8plex@N-term		1280.74	1	98.76	9	4.50897	1	4	60.2794	60.2913
1930	184	sp|Q96G03|PGM2_HUMAN	GVLTLSFALADK	iTRAQ8plex@N-term; iTRAQ8plex(K)@12		1842.11	2	99	13	4.83004	1	6	72.9913	72.9716
1931	185	sp|P13473|LAMP2_HUMAN	EQTVSVSGAFQINTFDLR	iTRAQ8plex@N-term		2315.21	1	99	15	4.52956	1	1	70.6638	70.7228
1932	185	sp|P13473|LAMP2_HUMAN	GILTVDELLAIR	iTRAQ8plex@N-term		1615.98	1	99	12	4.83498	1	11	80.0786	80.1138
1933	185	sp|P13473|LAMP2_HUMAN	YLDFVFAVK	iTRAQ8plex@N-term; iTRAQ8plex(K)@9		1709	2	99	14	4.99099	1	8	76.2305	76.1975
1934	186	sp|P47756|CAPZB_HUMAN	LTSTVMLWLQTNK	iTRAQ8plex@N-term; iTRAQ8plex(K)@13		2142.23	2	99	15	5.04082	1	1	79.8712	79.8516
1935	186	sp|P47756|CAPZB_HUMAN	SGSGTMNLGGSLTR	iTRAQ8plex@N-term		1640.85	1	99	13	4.00126	1	3	51.4496	51.3667
1936	186	sp|P47756|CAPZB_HUMAN	STLNEIYFGK	iTRAQ8plex@N-term; iTRAQ8plex(K)@10		1779	2	99	12	4.306	1	6	59.8867	59.8937
1937	187	sp|P20061|TCO1_HUMAN	LVGIQIQTLMQK	iTRAQ8plex@N-term; iTRAQ8plex(K)@12		1979.21	2	99	10	4.7415	1	2	71.5076	71.4396
1938	187	sp|P20061|TCO1_HUMAN	SWGPYITCIQGLCANNNDR	iTRAQ8plex@N-term; Methylthio(C)@8; Methylthio(C)@13		2520.13	3	99	7	4.2352	1	2	86.5604	86.4804
1939	187	sp|P20061|TCO1_HUMAN	TYWELLSGGEPLSQGAGSYVVR	iTRAQ8plex@N-term		2672.38	1	99	15	4.64084	0.478952	1	75.3997	75.4066
1940	187	sp|P20061|TCO1_HUMAN	TYWELLSGGEPLSQGAGSYVVR	iTRAQ8plex@N-term; Deamidated(Q)@14		2673.36	2	99	9	4.67742	0.521048	1	74.6597	74.58
1941	188	sp|P10599|THIO_HUMAN	CMPTFQFFK	iTRAQ8plex@N-term; Methylthio(C)@1; iTRAQ8plex(K)@9		1801.92	3	99	10	5.50942	1	17	72.7655	72.8352
1942	188	sp|P10599|THIO_HUMAN	LEATINELV	iTRAQ8plex@N-term		1304.75	1	99	9	5.77827	0.917996	8	79.6631	79.7812
1943	188	sp|P10599|THIO_HUMAN	LEATINELV	iTRAQ8plex@N-term; Deamidated(N)@6		1305.73	2	99	8	4.72926	0.0820041	6	82.7591	82.7877
1944	188	sp|P10599|THIO_HUMAN	TAFQEALDAAGDK	iTRAQ8plex@N-term; iTRAQ8plex(K)@13		1944.04	2	99	15	5.34381	0.597328	12	63.1636	63.2275
1945	188	sp|P10599|THIO_HUMAN	TAFQEALDAAGDK	iTRAQ8plex@N-term; Deamidated(Q)@4; iTRAQ8plex(K)@13		1945.03	3	99	13	5.17255	0.402672	2	62.1928	62.1302
1946	189	sp|P53396|ACLY_HUMAN	AFDSGIIPMEFVNK	iTRAQ8plex@N-term; iTRAQ8plex(K)@14		2175.19	2	99	12	4.50026	1	2	71.8997	71.8786
1947	189	sp|P53396|ACLY_HUMAN	DLVSSLTSGLLTIGDR	iTRAQ8plex@N-term		1950.09	1	99	13	4.54865	1	2	81.4749	81.4602
1948	189	sp|P53396|ACLY_HUMAN	EILIPVFK	iTRAQ8plex@N-term; iTRAQ8plex(K)@8		1566	2	98.1	8	4.43262	1	1	67.8957	67.8846
1949	189	sp|P53396|ACLY_HUMAN	IGNTGGMLDNILASK	iTRAQ8plex@N-term; Deamidated(N)@10; iTRAQ8plex(K)@15		2112.17	3	99	12	3.70122	1	1	69.5755	69.5019
1950	190	sp|Q9H4M9|EHD1_HUMAN	ADQIETQQLMR	iTRAQ8plex@N-term		1635.86	1	99	8	3.81351	1	1	53.3847	53.3641
1951	190	sp|Q9H4M9|EHD1_HUMAN	LLPLEEHYR	iTRAQ8plex@N-term		1472.83	1	98.24	8	4.18182	1	4	56.6956	56.6772
1952	190	sp|Q9H4M9|EHD1_HUMAN	VYGALMWSLGK	iTRAQ8plex@N-term; iTRAQ8plex(K)@11		1832.05	2	99	7	4.83995	1	7	75.6666	75.7452
1953	190	sp|Q9H4M9|EHD1_HUMAN	VYIGSFWSHPLLIPDNR	iTRAQ8plex@N-term		2317.25	1	99	11	4.36886	1	2	74.8167	74.8353
1954	191	sp|P68363|TBA1B_HUMAN	AVCMLSNTTAIAEAWAR	iTRAQ8plex@N-term; Methylthio(C)@3		2157.07	2	99	11	4.34475	1	2	81.793	81.815
1955	191	sp|P68363|TBA1B_HUMAN	EIIDLVLDR	iTRAQ8plex@N-term		1388.82	1	99	14	5.1151	1	8	74.903	75.011
1956	191	sp|P68363|TBA1B_HUMAN	LISQIVSSITASLR	iTRAQ8plex@N-term		1791.08	1	99	8	3.76597	1	2	96.9892	96.9173
1957	192	sp|O15511|ARPC5_HUMAN	AGSIVLK	iTRAQ8plex@N-term; iTRAQ8plex(K)@7		1294.84	2	98.95	7	3.55558	1	2	51.3581	51.4384
1958	192	sp|O15511|ARPC5_HUMAN	ALAAGGVGSIVR	iTRAQ8plex@N-term		1373.83	1	98.44	9	4.22097	1	1	56.5556	56.5875
1959	192	sp|O15511|ARPC5_HUMAN	GFESPSDNSSAMLLQWHEK	iTRAQ8plex@N-term; iTRAQ8plex(K)@19		2770.38	2	99	15	4.44356	1	5	62.0763	62.0849
1960	192	sp|O15511|ARPC5_HUMAN	QGNMTAALQAALK	Gln->pyro-Glu@N-term; iTRAQ8plex(K)@13		1602.87	2	99	11	4.18276	0.357534	2	70.3434	70.3569
1961	192	sp|O15511|ARPC5_HUMAN	QGNMTAALQAALK	iTRAQ8plex@N-term; iTRAQ8plex(K)@13		1924.1	2	99	9	4.43729	0.642466	3	62.3829	62.4032
1962	193	sp|Q9NUQ9|FA49B_HUMAN	AWGAVVPLVGK	iTRAQ8plex@N-term; iTRAQ8plex(K)@11		1704.05	2	99	12	4.6091	1	5	66.2179	66.2046
1963	193	sp|Q9NUQ9|FA49B_HUMAN	DAEGILEDLQSYR	iTRAQ8plex@N-term		1811.92	1	99	13	4.52731	1	9	72.2404	72.3862
1964	193	sp|Q9NUQ9|FA49B_HUMAN	QFAEILHFTLR	Gln->pyro-Glu@N-term		1356.72	1	99	9	4.67161	0.726363	4	79.6217	79.6024
1965	193	sp|Q9NUQ9|FA49B_HUMAN	QFAEILHFTLR	iTRAQ8plex@N-term		1677.95	1	99	9	4.24763	0.273637	1	70.2888	70.2755
1966	194	sp|P26641|EF1G_HUMAN	EYFSWEGAFQHVGK	iTRAQ8plex@N-term; iTRAQ8plex(K)@14		2292.18	2	99	12	4.67262	1	5	65.2681	65.295
1967	194	sp|P26641|EF1G_HUMAN	GQELAFPLSPDWQVDYESYTWR	iTRAQ8plex@N-term		2990.44	1	99	14	4.67913	1	4	79.9999	79.9605
1968	194	sp|P26641|EF1G_HUMAN	ILGLLDAYLK	iTRAQ8plex@N-term; iTRAQ8plex(K)@10		1726.09	2	99	10	5.16034	1	13	87.513	87.3673
1969	195	sp|P48735|IDHP_HUMAN	FKDIFQEIFDK	iTRAQ8plex@N-term; iTRAQ8plex(K)@2; iTRAQ8plex(K)@11	missed K-D@2	2341.34	4	99	12	5.48828	1	3	78.044	78.0776
1970	195	sp|P48735|IDHP_HUMAN	IIWQFIK	iTRAQ8plex@N-term; iTRAQ8plex(K)@7		1554.97	2	99	9	4.69883	1	6	73.4235	73.4141
1971	195	sp|P48735|IDHP_HUMAN	LIDDMVAQVLK	iTRAQ8plex@N-term; iTRAQ8plex(K)@11		1852.1	2	99	9	4.614	1	18	82.3064	82.254
1972	196	sp|P59666|DEF3_HUMAN; sp|P59665|DEF1_HUMAN	IPACIAGER	iTRAQ8plex@N-term; Methylthio(C)@4		1278.67	2	99	14	5.53165	1	50	59.6611	59.6517
1973	196	sp|P59666|DEF3_HUMAN; sp|P59665|DEF1_HUMAN	LWAFCC	iTRAQ8plex@N-term; Methylthio(C)@5; Methylthio(C)@6		1137.48	3	99	10	6.74405	1	20	96.7171	96.4494
1974	196	sp|P59666|DEF3_HUMAN; sp|P59665|DEF1_HUMAN	YGTCIYQGR	iTRAQ8plex@N-term; Methylthio(C)@4		1409.67	2	99	12	5.36553	1	43	54.7631	54.7532
1975	197	sp|P09525|ANXA4_HUMAN	GAGTDEGCLIEILASR	iTRAQ8plex@N-term; Methylthio(C)@8		1953.98	2	99	17	4.57053	1	3	75.9666	75.9719
1976	197	sp|P09525|ANXA4_HUMAN	GLGTDEDAIISVLAYR	iTRAQ8plex@N-term		1996.08	1	99	14	4.78474	1	5	78.2073	78.1542
1977	197	sp|P09525|ANXA4_HUMAN	SETSGSFEDALLAIVK	iTRAQ8plex@N-term; iTRAQ8plex(K)@16		2274.26	2	99	15	4.5944	1	7	79.2869	79.2733
1978	198	sp|P78417|GSTO1_HUMAN	GSAPPGPVPEGSIR	iTRAQ8plex@N-term		1623.89	1	99	13	3.5904	1	1	47.8404	47.859
1979	198	sp|P78417|GSTO1_HUMAN	MILELFSK	iTRAQ8plex@N-term; iTRAQ8plex(K)@8		1587.95	2	99	11	5.15943	1	14	75.8944	75.9263
1980	198	sp|P78417|GSTO1_HUMAN	VPSLVGSFIR	iTRAQ8plex@N-term		1377.83	1	99	6	4.55907	1	10	70.2838	70.3207
1981	199	sp|Q05315|LPPL_HUMAN	EYGAWK	iTRAQ8plex@N-term; iTRAQ8plex(K)@6		1360.76	2	99	9	3.71667	1	5	51.0241	51.0883
1982	199	sp|Q05315|LPPL_HUMAN	FNVSYLK	iTRAQ8plex@N-term; iTRAQ8plex(K)@7		1477.88	2	98.03	9	4.45362	1	4	60.1994	60.1874
1983	199	sp|Q05315|LPPL_HUMAN	NMPFQDGQEFELSISVLPDK	iTRAQ8plex@N-term; iTRAQ8plex(K)@20		2901.5	2	99	14	5.09467	1	6	74.8838	74.894
1984	200	sp|P61224|RAP1B_HUMAN	INVNEIFYDLVR	iTRAQ8plex@N-term		1797.99	1	99	18	5.47078	1	11	82.011	82.0662
1985	200	sp|P61224|RAP1B_HUMAN	LVVLGSGGVGK	iTRAQ8plex@N-term; iTRAQ8plex(K)@11		1593.01	2	99	12	4.47172	1	5	59.0461	59.0323
1986	200	sp|P61224|RAP1B_HUMAN	YDPTIEDSYR	iTRAQ8plex@N-term		1561.76	1	99	13	3.88598	1	11	52.5498	52.5296
1987	201	sp|P26022|PTX3_HUMAN	ALAAVLEELR	iTRAQ8plex@N-term		1387.83	1	99	12	4.53296	1	6	77.2559	77.2795
1988	201	sp|P26022|PTX3_HUMAN	LTGFNIWDSVLSNEEIR	iTRAQ8plex@N-term		2296.2	1	99	15	5.06481	1	4	81.5975	81.6624
1989	201	sp|P26022|PTX3_HUMAN	LTSALDELLQATR	iTRAQ8plex@N-term		1733.98	1	99	9	4.43473	0.789451	6	83.8013	83.7737
1990	201	sp|P26022|PTX3_HUMAN	LTSALDELLQATR	iTRAQ8plex@N-term; Deamidated(Q)@10		1734.97	2	99	8	3.86076	0.210549	1	83.7567	83.6848
1991	202	sp|P16284|PECA1_HUMAN	CTIQVTHLAQEFPEIIIQK	iTRAQ8plex@N-term; Methylthio(C)@1; iTRAQ8plex(K)@19		2864.58	3	99	10	4.27321	1	1	77.4573	77.4375
1992	202	sp|P16284|PECA1_HUMAN	TTAEYQLLVEGVPSPR	iTRAQ8plex@N-term		2063.12	1	99	13	4.28296	1	2	65.8632	65.843
1993	202	sp|P16284|PECA1_HUMAN	VIAPVDEVQISILSSK	iTRAQ8plex@N-term; iTRAQ8plex(K)@16		2305.37	2	99	12	4.30434	1	1	71.3405	71.3125
1994	203	sp|O00160|MYO1F_HUMAN	DIILQSNPLLEAFGNAK	iTRAQ8plex@N-term; iTRAQ8plex(K)@17		2450.4	2	99	8	4.40821	0.619506	10	78.0473	77.9882
1995	203	sp|O00160|MYO1F_HUMAN	DIILQSNPLLEAFGNAK	iTRAQ8plex@N-term; Deamidated(N)@7; iTRAQ8plex(K)@17		2451.38	3	99	11	4.19651	0.380494	3	77.6678	77.678
1996	203	sp|O00160|MYO1F_HUMAN	QDDFFILQEDAADSFLESVFK	iTRAQ8plex@N-term; iTRAQ8plex(K)@21		3071.56	2	99	17	3.88745	1	6	94.9258	94.8859
1997	203	sp|O00160|MYO1F_HUMAN	RPLPLTFSDTLQFR	iTRAQ8plex@N-term		1994.13	1	99	14	4.86174	1	4	66.5881	66.6017
1998	204	sp|O60610|DIAP1_HUMAN	DMPLLSCLESLR	iTRAQ8plex@N-term; Methylthio(C)@7		1725.88	2	99	14	5.16723	1	13	86.6295	86.5711
[truncated: 870 more rows]

## Sheet: Protein List n=765
Supplementary Table 2B: List of 765 proteins identified using iTRAQ
Protein N	Representative Accession	Species	Name	Unused ProtScore	Total ProtScore	Ambiguous Accessions	Confident Peptides	Confident Sequences	Confident Spectra	%Seq Cov - peptides >95% conf	Ambiguous Accession 1	Ambiguous Accession 2	Ambiguous Accession 3	Ambiguous Accession 4	Ambiguous Accession 5	Ambiguous Accession 6	Ambiguous Accession 7	Ambiguous Accession 8	Ambiguous Accession 9	Ambiguous Accession 10	Contam
1	sp|P21333|FLNA_HUMAN	HUMAN	Filamin-A OS=Homo sapiens GN=FLNA PE=1 SV=4	159.08	159.08	1	79	73	487	43.6	sp|P21333|FLNA_HUMAN
2	sp|P35579|MYH9_HUMAN	HUMAN	Myosin-9 OS=Homo sapiens GN=MYH9 PE=1 SV=4	149.99	149.99	1	84	65	692	40.82	sp|P35579|MYH9_HUMAN
3	sp|Q9Y490|TLN1_HUMAN	HUMAN	Talin-1 OS=Homo sapiens GN=TLN1 PE=1 SV=3	114.83	114.83	1	66	50	480	34	sp|Q9Y490|TLN1_HUMAN
4	sp|P02788|TRFL_HUMAN	HUMAN	Lactotransferrin OS=Homo sapiens GN=LTF PE=1 SV=6	89.24	89.24	1	57	42	755	74.23	sp|P02788|TRFL_HUMAN
5	sp|P12814|ACTN1_HUMAN	HUMAN	Alpha-actinin-1 OS=Homo sapiens GN=ACTN1 PE=1 SV=2	69.65	69.68	1	34	28	454	47.65	sp|P12814|ACTN1_HUMAN
6	sp|P05164|PERM_HUMAN	HUMAN	Myeloperoxidase OS=Homo sapiens GN=MPO PE=1 SV=1	68.13	68.3	1	41	32	483	48.72	sp|P05164|PERM_HUMAN
7	sp|P18206|VINC_HUMAN	HUMAN	Vinculin OS=Homo sapiens GN=VCL PE=1 SV=4	57.96	57.96	1	30	26	230	30.25	sp|P18206|VINC_HUMAN
8	sp|P13796|PLSL_HUMAN	HUMAN	Plastin-2 OS=Homo sapiens GN=LCP1 PE=1 SV=5	56.03	56.03	1	34	26	295	56.94	sp|P13796|PLSL_HUMAN
9	sp|P06744|G6PI_HUMAN	HUMAN	Glucose-6-phosphate isomerase OS=Homo sapiens GN=GPI PE=1 SV=4	46.14	46.22	1	24	20	158	53.94	sp|P06744|G6PI_HUMAN
10	sp|P14618|KPYM_HUMAN	HUMAN	Pyruvate kinase isozymes M1/M2 OS=Homo sapiens GN=PKM2 PE=1 SV=4	42.41	42.41	1	23	19	145	45.39	sp|P14618|KPYM_HUMAN
11	sp|P00558|PGK1_HUMAN	HUMAN	Phosphoglycerate kinase 1 OS=Homo sapiens GN=PGK1 PE=1 SV=3	41.41	41.41	1	22	18	164	59.95	sp|P00558|PGK1_HUMAN
12	sp|P14780|MMP9_HUMAN	HUMAN	Matrix metalloproteinase-9 OS=Homo sapiens GN=MMP9 PE=1 SV=2	41.1	41.1	1	22	19	144	41.73	sp|P14780|MMP9_HUMAN
13	sp|P04406|G3P_HUMAN	HUMAN	Glyceraldehyde-3-phosphate dehydrogenase OS=Homo sapiens GN=GAPDH PE=1 SV=3	40.5	40.6	1	29	20	345	65.07	sp|P04406|G3P_HUMAN
14	sp|P08514|ITA2B_HUMAN	HUMAN	Integrin alpha-IIb OS=Homo sapiens GN=ITGA2B PE=1 SV=2	39.85	39.85	1	21	19	122	24.45	sp|P08514|ITA2B_HUMAN
15	sp|P46940|IQGA1_HUMAN	HUMAN	Ras GTPase-activating-like protein IQGAP1 OS=Homo sapiens GN=IQGAP1 PE=1 SV=1	39.76	39.76	1	21	18	90	21.79	sp|P46940|IQGA1_HUMAN
16	sp|P06396|GELS_HUMAN	HUMAN	Gelsolin OS=Homo sapiens GN=GSN PE=1 SV=1	39.3	39.3	1	20	17	81	39.9	sp|P06396|GELS_HUMAN
17	sp|P29401|TKT_HUMAN	HUMAN	Transketolase OS=Homo sapiens GN=TKT PE=1 SV=3	39.08	39.19	1	20	17	142	44.46	sp|P29401|TKT_HUMAN
18	sp|P52209|6PGD_HUMAN	HUMAN	6-phosphogluconate dehydrogenase, decarboxylating OS=Homo sapiens GN=PGD PE=1 SV=3	35.85	35.85	1	17	15	118	37.27	sp|P52209|6PGD_HUMAN
19	sp|P06733|ENOA_HUMAN	HUMAN	Alpha-enolase OS=Homo sapiens GN=ENO1 PE=1 SV=2	35.3	35.31	1	18	15	95	49.54	sp|P06733|ENOA_HUMAN
20	sp|P04083|ANXA1_HUMAN	HUMAN	Annexin A1 OS=Homo sapiens GN=ANXA1 PE=1 SV=2	34.34	34.58	1	17	16	129	53.47	sp|P04083|ANXA1_HUMAN
21	sp|P08107|HSP71_HUMAN	HUMAN	Heat shock 70 kDa protein 1 OS=Homo sapiens GN=HSPA1A PE=1 SV=5	33.07	33.07	1	17	16	146	37.44	sp|P08107|HSP71_HUMAN
22	sp|P67936|TPM4_HUMAN	HUMAN	Tropomyosin alpha-4 chain OS=Homo sapiens GN=TPM4 PE=1 SV=3	32.77	32.77	1	15	15	124	52.82	sp|P67936|TPM4_HUMAN
23	sp|P06737|PYGL_HUMAN	HUMAN	Glycogen phosphorylase, liver form OS=Homo sapiens GN=PYGL PE=1 SV=4	32.66	32.95	1	16	14	61	21.13	sp|P06737|PYGL_HUMAN
24	sp|P02675|FIBB_HUMAN	HUMAN	Fibrinogen beta chain OS=Homo sapiens GN=FGB PE=1 SV=2	32.52	32.52	1	16	15	77	48.47	sp|P02675|FIBB_HUMAN
25	sp|P11215|ITAM_HUMAN	HUMAN	Integrin alpha-M OS=Homo sapiens GN=ITGAM PE=1 SV=2	31.74	31.75	1	16	15	69	16.32	sp|P11215|ITAM_HUMAN
26	sp|P08133|ANXA6_HUMAN	HUMAN	Annexin A6 OS=Homo sapiens GN=ANXA6 PE=1 SV=3	31.6	32.24	1	14	14	63	29.27	sp|P08133|ANXA6_HUMAN
27	sp|P26038|MOES_HUMAN	HUMAN	Moesin OS=Homo sapiens GN=MSN PE=1 SV=3	31.09	31.09	1	17	15	69	28.94	sp|P26038|MOES_HUMAN
28	sp|P02768|ALBU_HUMAN	HUMAN	Serum albumin OS=Homo sapiens GN=ALB PE=1 SV=2	30.59	30.87	1	17	13	77	33.66	sp|P02768|ALBU_HUMAN
29	sp|P63261|ACTG_HUMAN	HUMAN	Actin, cytoplasmic 2 OS=Homo sapiens GN=ACTG1 PE=1 SV=1	30.18	30.62	2	16	12	181	48.53	sp|P63261|ACTG_HUMAN	sp|P60709|ACTB_HUMAN
30	sp|P00338|LDHA_HUMAN	HUMAN	L-lactate dehydrogenase A chain OS=Homo sapiens GN=LDHA PE=1 SV=2	29.71	29.71	1	15	13	145	46.99	sp|P00338|LDHA_HUMAN
31	sp|O75083|WDR1_HUMAN	HUMAN	WD repeat-containing protein 1 OS=Homo sapiens GN=WDR1 PE=1 SV=4	29.56	29.56	1	14	13	63	40.43	sp|O75083|WDR1_HUMAN
32	sp|P04040|CATA_HUMAN	HUMAN	Catalase OS=Homo sapiens GN=CAT PE=1 SV=3	27.78	27.78	1	16	12	93	38.14	sp|P04040|CATA_HUMAN
33	sp|P52790|HXK3_HUMAN	HUMAN	Hexokinase-3 OS=Homo sapiens GN=HK3 PE=2 SV=2	27.22	27.31	1	16	13	121	21.89	sp|P52790|HXK3_HUMAN
34	sp|Q01518|CAP1_HUMAN	HUMAN	Adenylyl cyclase-associated protein 1 OS=Homo sapiens GN=CAP1 PE=1 SV=4	27	27	1	15	13	112	35.58	sp|Q01518|CAP1_HUMAN
35	sp|P02751|FINC_HUMAN	HUMAN	Fibronectin OS=Homo sapiens GN=FN1 PE=1 SV=3	25.44	25.44	1	13	12	45	11.19	sp|P02751|FINC_HUMAN
36	sp|P05107|ITB2_HUMAN	HUMAN	Integrin beta-2 OS=Homo sapiens GN=ITGB2 PE=1 SV=2	25.31	25.31	1	12	11	37	22.76	sp|P05107|ITB2_HUMAN
37	sp|P04075|ALDOA_HUMAN	HUMAN	Fructose-bisphosphate aldolase A OS=Homo sapiens GN=ALDOA PE=1 SV=2	25.31	25.31	1	16	12	103	50.27	sp|P04075|ALDOA_HUMAN
38	sp|P05106|ITB3_HUMAN	HUMAN	Integrin beta-3 OS=Homo sapiens GN=ITGB3 PE=1 SV=2	25.22	25.22	1	13	11	44	27.03	sp|P05106|ITB3_HUMAN
39	sp|P37837|TALDO_HUMAN	HUMAN	Transaldolase OS=Homo sapiens GN=TALDO1 PE=1 SV=2	24.59	24.65	1	12	11	83	35.01	sp|P37837|TALDO_HUMAN
40	sp|P00491|PNPH_HUMAN	HUMAN	Purine nucleoside phosphorylase OS=Homo sapiens GN=NP PE=1 SV=2	24.57	24.63	1	12	12	43	54.67	sp|P00491|PNPH_HUMAN
41	sp|P68871|HBB_HUMAN	HUMAN	Hemoglobin subunit beta OS=Homo sapiens GN=HBB PE=1 SV=2	24.57	24.6	1	14	12	139	89.8	sp|P68871|HBB_HUMAN
42	sp|P09960|LKHA4_HUMAN	HUMAN	Leukotriene A-4 hydrolase OS=Homo sapiens GN=LTA4H PE=1 SV=2	24.14	25.36	1	10	10	66	23.4	sp|P09960|LKHA4_HUMAN
43	sp|Q6XQN6|PNCB_HUMAN	HUMAN	Nicotinate phosphoribosyltransferase OS=Homo sapiens GN=NAPRT1 PE=1 SV=2	23.85	23.85	1	15	12	69	44.42	sp|Q6XQN6|PNCB_HUMAN
44	sp|P60174|TPIS_HUMAN	HUMAN	Triosephosphate isomerase OS=Homo sapiens GN=TPI1 PE=1 SV=2	23.77	23.77	1	15	12	108	65.86	sp|P60174|TPIS_HUMAN
45	sp|P07996|TSP1_HUMAN	HUMAN	Thrombospondin-1 OS=Homo sapiens GN=THBS1 PE=1 SV=2	23.05	23.13	1	10	9	52	11.88	sp|P07996|TSP1_HUMAN
46	sp|P05109|S10A8_HUMAN	HUMAN	Protein S100-A8 OS=Homo sapiens GN=S100A8 PE=1 SV=1	22.89	22.98	1	14	10	372	91.4	sp|P05109|S10A8_HUMAN
47	sp|P18669|PGAM1_HUMAN	HUMAN	Phosphoglycerate mutase 1 OS=Homo sapiens GN=PGAM1 PE=1 SV=2	22.44	22.44	1	14	10	71	70.47	sp|P18669|PGAM1_HUMAN
48	sp|P11413|G6PD_HUMAN	HUMAN	Glucose-6-phosphate 1-dehydrogenase OS=Homo sapiens GN=G6PD PE=1 SV=4	21.97	22.79	1	11	11	34	19.42	sp|P11413|G6PD_HUMAN
49	sp|P40926|MDHM_HUMAN	HUMAN	Malate dehydrogenase, mitochondrial OS=Homo sapiens GN=MDH2 PE=1 SV=2	21.81	21.81	1	10	10	57	46.15	sp|P40926|MDHM_HUMAN
50	sp|P80188|NGAL_HUMAN	HUMAN	Neutrophil gelatinase-associated lipocalin OS=Homo sapiens GN=LCN2 PE=1 SV=2	21.58	21.58	1	15	11	153	63.13	sp|P80188|NGAL_HUMAN
51	sp|P62937|PPIA_HUMAN	HUMAN	Peptidyl-prolyl cis-trans isomerase A OS=Homo sapiens GN=PPIA PE=1 SV=2	20.29	20.29	1	11	9	67	58.18	sp|P62937|PPIA_HUMAN
52	sp|P08575|CD45_HUMAN	HUMAN	Leukocyte common antigen OS=Homo sapiens GN=PTPRC PE=1 SV=2	20.24	20.24	1	9	9	31	10.81	sp|P08575|CD45_HUMAN
53	sp|P07195|LDHB_HUMAN	HUMAN	L-lactate dehydrogenase B chain OS=Homo sapiens GN=LDHB PE=1 SV=2	20.16	22.59	1	11	10	80	36.53	sp|P07195|LDHB_HUMAN
54	sp|P61158|ARP3_HUMAN	HUMAN	Actin-related protein 3 OS=Homo sapiens GN=ACTR3 PE=1 SV=3	20.02	20.02	1	11	9	55	32.3	sp|P61158|ARP3_HUMAN
55	sp|P07237|PDIA1_HUMAN	HUMAN	Protein disulfide-isomerase OS=Homo sapiens GN=P4HB PE=1 SV=3	19.81	20.18	1	9	8	54	26.38	sp|P07237|PDIA1_HUMAN
56	sp|P12429|ANXA3_HUMAN	HUMAN	Annexin A3 OS=Homo sapiens GN=ANXA3 PE=1 SV=3	19.62	24.89	1	10	10	44	40.87	sp|P12429|ANXA3_HUMAN
57	sp|Q6UX06|OLFM4_HUMAN	HUMAN	Olfactomedin-4 OS=Homo sapiens GN=OLFM4 PE=1 SV=1	19.55	19.55	1	13	10	58	25.1	sp|Q6UX06|OLFM4_HUMAN
58	sp|P31146|COR1A_HUMAN	HUMAN	Coronin-1A OS=Homo sapiens GN=CORO1A PE=1 SV=4	19.54	19.54	1	10	9	46	29.5	sp|P31146|COR1A_HUMAN
59	sp|P29350|PTN6_HUMAN	HUMAN	Tyrosine-protein phosphatase non-receptor type 6 OS=Homo sapiens GN=PTPN6 PE=1 SV=1	19.43	19.43	1	10	9	38	24.2	sp|P29350|PTN6_HUMAN
60	sp|P17213|BPI_HUMAN	HUMAN	Bactericidal permeability-increasing protein OS=Homo sapiens GN=BPI PE=1 SV=3	19.1	19.15	1	10	9	45	35.93	sp|P17213|BPI_HUMAN
61	sp|P08758|ANXA5_HUMAN	HUMAN	Annexin A5 OS=Homo sapiens GN=ANXA5 PE=1 SV=2	18.88	19.01	1	9	9	93	39.06	sp|P08758|ANXA5_HUMAN
62	sp|O00299|CLIC1_HUMAN	HUMAN	Chloride intracellular channel protein 1 OS=Homo sapiens GN=CLIC1 PE=1 SV=4	18.8	18.8	1	10	9	93	51.04	sp|O00299|CLIC1_HUMAN
63	sp|P07737|PROF1_HUMAN	HUMAN	Profilin-1 OS=Homo sapiens GN=PFN1 PE=1 SV=2	18.21	18.21	1	12	9	212	70.71	sp|P07737|PROF1_HUMAN
64	sp|P11142|HSP7C_HUMAN	HUMAN	Heat shock cognate 71 kDa protein OS=Homo sapiens GN=HSPA8 PE=1 SV=1	18.02	24.45	1	9	8	66	20.43	sp|P11142|HSP7C_HUMAN
65	sp|P06702|S10A9_HUMAN	HUMAN	Protein S100-A9 OS=Homo sapiens GN=S100A9 PE=1 SV=1	17.89	18.02	1	15	8	397	86.84	sp|P06702|S10A9_HUMAN
66	sp|P00488|F13A_HUMAN	HUMAN	Coagulation factor XIII A chain OS=Homo sapiens GN=F13A1 PE=1 SV=4	17.76	17.77	1	10	9	43	18.31	sp|P00488|F13A_HUMAN
67	sp|P02679|FIBG_HUMAN	HUMAN	Fibrinogen gamma chain OS=Homo sapiens GN=FGG PE=1 SV=3	17.71	17.94	1	7	7	24	24.5	sp|P02679|FIBG_HUMAN
68	sp|P07900|HS90A_HUMAN	HUMAN	Heat shock protein HSP 90-alpha OS=Homo sapiens GN=HSP90AA1 PE=1 SV=5	17.07	17.17	1	5	5	12	15.03	sp|P07900|HS90A_HUMAN
69	sp|P08567|PLEK_HUMAN	HUMAN	Pleckstrin OS=Homo sapiens GN=PLEK PE=1 SV=2	16.87	16.96	1	10	9	40	31.14	sp|P08567|PLEK_HUMAN
70	sp|P52566|GDIR2_HUMAN	HUMAN	Rho GDP-dissociation inhibitor 2 OS=Homo sapiens GN=ARHGDIB PE=1 SV=3	16.57	16.57	1	9	7	61	61.19	sp|P52566|GDIR2_HUMAN
71	sp|P63104|1433Z_HUMAN	HUMAN	14-3-3 protein zeta/delta OS=Homo sapiens GN=YWHAZ PE=1 SV=1	16.38	16.38	1	8	7	117	40.41	sp|P63104|1433Z_HUMAN
72	sp|P22894|MMP8_HUMAN	HUMAN	Neutrophil collagenase OS=Homo sapiens GN=MMP8 PE=1 SV=1	16.19	16.19	1	8	8	41	26.12	sp|P22894|MMP8_HUMAN
73	sp|P36873|PP1G_HUMAN	HUMAN	Serine/threonine-protein phosphatase PP1-gamma catalytic subunit OS=Homo sapiens GN=PPP1CC PE=1 SV=1	16.1	16.58	2	9	8	41	39.63	sp|P36873|PP1G_HUMAN	sp|P62136|PP1A_HUMAN
74	sp|Q14764|MVP_HUMAN	HUMAN	Major vault protein OS=Homo sapiens GN=MVP PE=1 SV=4	16.02	16.26	1	8	8	26	16.01	sp|Q14764|MVP_HUMAN
75	sp|P27105|STOM_HUMAN	HUMAN	Erythrocyte band 7 integral membrane protein OS=Homo sapiens GN=STOM PE=1 SV=3	15.98	16.04	1	9	8	96	47.57	sp|P27105|STOM_HUMAN
76	sp|Q99536|VAT1_HUMAN	HUMAN	Synaptic vesicle membrane protein VAT-1 homolog OS=Homo sapiens GN=VAT1 PE=1 SV=2	15.8	15.8	1	7	7	32	34.35	sp|Q99536|VAT1_HUMAN
77	sp|O15144|ARPC2_HUMAN	HUMAN	Actin-related protein 2/3 complex subunit 2 OS=Homo sapiens GN=ARPC2 PE=1 SV=1	15.42	15.42	1	7	6	33	28.33	sp|O15144|ARPC2_HUMAN
78	sp|P30044|PRDX5_HUMAN	HUMAN	Peroxiredoxin-5, mitochondrial OS=Homo sapiens GN=PRDX5 PE=1 SV=3	15.24	15.24	1	8	8	34	55.14	sp|P30044|PRDX5_HUMAN
79	sp|Q86UX7|URP2_HUMAN	HUMAN	Fermitin family homolog 3 OS=Homo sapiens GN=FERMT3 PE=1 SV=1	14.91	14.91	1	8	7	25	16.19	sp|Q86UX7|URP2_HUMAN
80	sp|P50395|GDIB_HUMAN	HUMAN	Rab GDP dissociation inhibitor beta OS=Homo sapiens GN=GDI2 PE=1 SV=2	14.89	14.96	1	7	7	50	24.27	sp|P50395|GDIB_HUMAN
81	sp|P60660|MYL6_HUMAN	HUMAN	Myosin light polypeptide 6 OS=Homo sapiens GN=MYL6 PE=1 SV=2	14.64	14.64	1	7	7	26	47.68	sp|P60660|MYL6_HUMAN
82	sp|P02671|FIBA_HUMAN	HUMAN	Fibrinogen alpha chain OS=Homo sapiens GN=FGA PE=1 SV=2	14.5	14.57	1	6	6	53	7.852	sp|P02671|FIBA_HUMAN
83	sp|P20160|CAP7_HUMAN	HUMAN	Azurocidin OS=Homo sapiens GN=AZU1 PE=1 SV=3	14.47	14.47	1	8	7	56	50.6	sp|P20160|CAP7_HUMAN
84	sp|P19105|MRLC3_HUMAN	HUMAN	Myosin regulatory light chain MRLC3 OS=Homo sapiens GN=MRLC3 PE=1 SV=2	14.34	14.34	2	8	7	21	63.16	sp|P19105|MRLC3_HUMAN	sp|O14950|MRLC2_HUMAN
85	sp|P08246|ELNE_HUMAN	HUMAN	Leukocyte elastase OS=Homo sapiens GN=ELA2 PE=1 SV=1	13.9	14.02	1	11	7	150	31.84	sp|P08246|ELNE_HUMAN
86	sp|P23528|COF1_HUMAN	HUMAN	Cofilin-1 OS=Homo sapiens GN=CFL1 PE=1 SV=3	13.56	13.56	1	6	5	21	44.58	sp|P23528|COF1_HUMAN
87	sp|P30041|PRDX6_HUMAN	HUMAN	Peroxiredoxin-6 OS=Homo sapiens GN=PRDX6 PE=1 SV=3	13.45	13.45	1	7	7	28	31.25	sp|P30041|PRDX6_HUMAN
88	sp|P13639|EF2_HUMAN	HUMAN	Elongation factor 2 OS=Homo sapiens GN=EEF2 PE=1 SV=4	13.38	13.45	1	9	6	45	11.89	sp|P13639|EF2_HUMAN
89	sp|P55072|TERA_HUMAN	HUMAN	Transitional endoplasmic reticulum ATPase OS=Homo sapiens GN=VCP PE=1 SV=4	13.22	13.22	1	6	6	19	14.52	sp|P55072|TERA_HUMAN
90	sp|P00738|HPT_HUMAN	HUMAN	Haptoglobin OS=Homo sapiens GN=HP PE=1 SV=1	13	13	1	7	6	43	18.47	sp|P00738|HPT_HUMAN
91	sp|P08670|VIME_HUMAN	HUMAN	Vimentin OS=Homo sapiens GN=VIM PE=1 SV=4	12.94	12.94	1	6	6	37	16.52	sp|P08670|VIME_HUMAN
92	sp|P49913|CAMP_HUMAN	HUMAN	Cathelicidin antimicrobial peptide OS=Homo sapiens GN=CAMP PE=1 SV=1	12.87	12.87	1	5	5	121	28.24	sp|P49913|CAMP_HUMAN
93	sp|P07384|CAN1_HUMAN	HUMAN	Calpain-1 catalytic subunit OS=Homo sapiens GN=CAPN1 PE=1 SV=1	12.75	12.88	1	6	6	20	9.384	sp|P07384|CAN1_HUMAN
94	sp|P11021|GRP78_HUMAN	HUMAN	78 kDa glucose-regulated protein OS=Homo sapiens GN=HSPA5 PE=1 SV=2	12.53	16.39	1	5	5	32	12.39	sp|P11021|GRP78_HUMAN
95	sp|P16671|CD36_HUMAN	HUMAN	Platelet glycoprotein 4 OS=Homo sapiens GN=CD36 PE=1 SV=2	12.48	12.48	1	6	6	32	18.22	sp|P16671|CD36_HUMAN
96	sp|Q9HDC9|APMAP_HUMAN	HUMAN	Adipocyte plasma membrane-associated protein OS=Homo sapiens GN=APMAP PE=1 SV=2	12.37	12.46	1	6	5	42	20.19	sp|Q9HDC9|APMAP_HUMAN
97	sp|P04899|GNAI2_HUMAN	HUMAN	Guanine nucleotide-binding protein G(i), alpha-2 subunit OS=Homo sapiens GN=GNAI2 PE=1 SV=3	12.22	12.22	1	8	6	36	24.79	sp|P04899|GNAI2_HUMAN
98	sp|P61586|RHOA_HUMAN	HUMAN	Transforming protein RhoA OS=Homo sapiens GN=RHOA PE=1 SV=1	12.19	12.19	2	6	6	30	43.01	sp|P61586|RHOA_HUMAN	sp|P08134|RHOC_HUMAN
99	sp|P24158|PRTN3_HUMAN	HUMAN	Myeloblastin OS=Homo sapiens GN=PRTN3 PE=1 SV=3	12.07	12.07	1	8	6	83	32.81	sp|P24158|PRTN3_HUMAN
100	sp|P36222|CH3L1_HUMAN	HUMAN	Chitinase-3-like protein 1 OS=Homo sapiens GN=CHI3L1 PE=1 SV=2	12	12.04	1	6	6	21	23.24	sp|P36222|CH3L1_HUMAN
101	sp|P27797|CALR_HUMAN	HUMAN	Calreticulin OS=Homo sapiens GN=CALR PE=1 SV=1	11.75	11.75	1	5	5	32	20.86	sp|P27797|CALR_HUMAN
102	sp|P31939|PUR9_HUMAN	HUMAN	Bifunctional purine biosynthesis protein PURH OS=Homo sapiens GN=ATIC PE=1 SV=3	11.7	11.7	1	6	6	15	15.2	sp|P31939|PUR9_HUMAN
103	sp|P06576|ATPB_HUMAN	HUMAN	ATP synthase subunit beta, mitochondrial OS=Homo sapiens GN=ATP5B PE=1 SV=3	11.66	11.66	1	6	6	15	15.88	sp|P06576|ATPB_HUMAN
104	sp|Q00610|CLH1_HUMAN	HUMAN	Clathrin heavy chain 1 OS=Homo sapiens GN=CLTC PE=1 SV=5	11.64	11.77	1	6	5	30	4.299	sp|Q00610|CLH1_HUMAN
105	sp|P43490|NAMPT_HUMAN	HUMAN	Nicotinamide phosphoribosyltransferase OS=Homo sapiens GN=NAMPT PE=1 SV=1	11.64	11.69	1	7	6	29	16.09	sp|P43490|NAMPT_HUMAN
106	sp|P17858|K6PL_HUMAN	HUMAN	6-phosphofructokinase, liver type OS=Homo sapiens GN=PFKL PE=1 SV=6	11.51	11.56	1	6	6	22	11.54	sp|P17858|K6PL_HUMAN
107	sp|P37802|TAGL2_HUMAN	HUMAN	Transgelin-2 OS=Homo sapiens GN=TAGLN2 PE=1 SV=3	11.46	11.46	1	5	5	24	42.71	sp|P37802|TAGL2_HUMAN
108	sp|P00387|NB5R3_HUMAN	HUMAN	NADH-cytochrome b5 reductase 3 OS=Homo sapiens GN=CYB5R3 PE=1 SV=3	11.12	11.49	1	5	5	16	25.58	sp|P00387|NB5R3_HUMAN
109	sp|O94919|ENDD1_HUMAN	HUMAN	Endonuclease domain-containing 1 protein OS=Homo sapiens GN=ENDOD1 PE=1 SV=2	11.11	11.11	1	7	5	16	22.8	sp|O94919|ENDD1_HUMAN
110	sp|P69905|HBA_HUMAN	HUMAN	Hemoglobin subunit alpha OS=Homo sapiens GN=HBA1 PE=1 SV=2	10.8	10.96	1	6	5	48	46.48	sp|P69905|HBA_HUMAN
111	sp|P02647|APOA1_HUMAN	HUMAN	Apolipoprotein A-I OS=Homo sapiens GN=APOA1 PE=1 SV=1	10.75	10.86	1	5	5	12	23.97	sp|P02647|APOA1_HUMAN
112	sp|P22314|UBA1_HUMAN	HUMAN	Ubiquitin-like modifier-activating enzyme 1 OS=Homo sapiens GN=UBA1 PE=1 SV=3	10.75	10.81	1	6	5	27	8.034	sp|P22314|UBA1_HUMAN
113	sp|Q10567|AP1B1_HUMAN	HUMAN	AP-1 complex subunit beta-1 OS=Homo sapiens GN=AP1B1 PE=2 SV=1	10.7	10.7	1	5	5	17	7.376	sp|Q10567|AP1B1_HUMAN
114	sp|Q14019|COTL1_HUMAN	HUMAN	Coactosin-like protein OS=Homo sapiens GN=COTL1 PE=1 SV=3	10.64	10.64	1	5	5	12	54.23	sp|Q14019|COTL1_HUMAN
115	sp|O43451|MGA_HUMAN	HUMAN	Maltase-glucoamylase, intestinal OS=Homo sapiens GN=MGAM PE=1 SV=4	10.55	10.58	1	6	5	14	5.062	sp|O43451|MGA_HUMAN
116	sp|P40925|MDHC_HUMAN	HUMAN	Malate dehydrogenase, cytoplasmic OS=Homo sapiens GN=MDH1 PE=1 SV=4	10.35	10.35	1	4	4	12	21.86	sp|P40925|MDHC_HUMAN
117	sp|P07948|LYN_HUMAN	HUMAN	Tyrosine-protein kinase Lyn OS=Homo sapiens GN=LYN PE=1 SV=3	10.33	10.41	1	6	5	19	14.45	sp|P07948|LYN_HUMAN
118	sp|Q99497|PARK7_HUMAN	HUMAN	Protein DJ-1 OS=Homo sapiens GN=PARK7 PE=1 SV=2	10.3	10.3	1	5	5	31	51.32	sp|Q99497|PARK7_HUMAN
119	sp|Q13510|ASAH1_HUMAN	HUMAN	Acid ceramidase OS=Homo sapiens GN=ASAH1 PE=1 SV=4	10.25	10.25	1	5	5	17	18.73	sp|Q13510|ASAH1_HUMAN
120	sp|P07741|APT_HUMAN	HUMAN	Adenine phosphoribosyltransferase OS=Homo sapiens GN=APRT PE=1 SV=2	10.14	10.14	1	6	5	19	48.33	sp|P07741|APT_HUMAN
121	sp|P02775|CXCL7_HUMAN	HUMAN	Platelet basic protein OS=Homo sapiens GN=PPBP PE=1 SV=3	10.13	10.13	1	6	5	44	37.5	sp|P02775|CXCL7_HUMAN
122	sp|Q99439|CNN2_HUMAN	HUMAN	Calponin-2 OS=Homo sapiens GN=CNN2 PE=1 SV=4	10	10	1	6	5	41	21.36	sp|Q99439|CNN2_HUMAN
123	sp|Q10588|BST1_HUMAN	HUMAN	ADP-ribosyl cyclase 2 OS=Homo sapiens GN=BST1 PE=1 SV=2	10	10	1	5	5	37	23.58	sp|Q10588|BST1_HUMAN
124	sp|Q15404|RSU1_HUMAN	HUMAN	Ras suppressor protein 1 OS=Homo sapiens GN=RSU1 PE=1 SV=3	9.96	9.96	1	5	5	19	35.02	sp|Q15404|RSU1_HUMAN
125	sp|P54819|KAD2_HUMAN	HUMAN	Adenylate kinase isoenzyme 2, mitochondrial OS=Homo sapiens GN=AK2 PE=1 SV=2	9.9	9.95	1	5	5	10	31.38	sp|P54819|KAD2_HUMAN
126	sp|P36871|PGM1_HUMAN	HUMAN	Phosphoglucomutase-1 OS=Homo sapiens GN=PGM1 PE=1 SV=3	9.85	9.85	1	5	5	12	10.32	sp|P36871|PGM1_HUMAN
127	sp|Q16851|UGPA_HUMAN	HUMAN	UTP--glucose-1-phosphate uridylyltransferase OS=Homo sapiens GN=UGP2 PE=1 SV=5	9.79	9.84	1	5	5	8	15.16	sp|Q16851|UGPA_HUMAN
128	sp|P50995|ANX11_HUMAN	HUMAN	Annexin A11 OS=Homo sapiens GN=ANXA11 PE=1 SV=1	9.48	10.04	1	5	5	10	12.28	sp|P50995|ANX11_HUMAN
129	sp|Q14974|IMB1_HUMAN	HUMAN	Importin subunit beta-1 OS=Homo sapiens GN=KPNB1 PE=1 SV=2	9.37	9.48	1	6	5	49	8.562	sp|Q14974|IMB1_HUMAN
130	sp|Q13576|IQGA2_HUMAN	HUMAN	Ras GTPase-activating-like protein IQGAP2 OS=Homo sapiens GN=IQGAP2 PE=1 SV=3	9.34	9.9	1	6	5	13	4.825	sp|Q13576|IQGA2_HUMAN
131	sp|P05089|ARGI1_HUMAN	HUMAN	Arginase-1 OS=Homo sapiens GN=ARG1 PE=1 SV=2	9.33	9.41	1	4	4	46	20.81	sp|P05089|ARGI1_HUMAN
132	sp|P60900|PSA6_HUMAN	HUMAN	Proteasome subunit alpha type-6 OS=Homo sapiens GN=PSMA6 PE=1 SV=1	9.27	9.27	1	5	4	18	27.24	sp|P60900|PSA6_HUMAN
133	sp|O75923|DYSF_HUMAN	HUMAN	Dysferlin OS=Homo sapiens GN=DYSF PE=1 SV=1	9.25	9.44	1	4	4	19	4.087	sp|O75923|DYSF_HUMAN
134	sp|O95336|6PGL_HUMAN	HUMAN	6-phosphogluconolactonase OS=Homo sapiens GN=PGLS PE=1 SV=2	9.16	9.16	1	5	5	21	31.01	sp|O95336|6PGL_HUMAN
135	sp|P07359|GP1BA_HUMAN	HUMAN	Platelet glycoprotein Ib alpha chain OS=Homo sapiens GN=GP1BA PE=1 SV=1	9.06	9.14	1	5	5	10	8.466	sp|P07359|GP1BA_HUMAN
136	sp|P27824|CALX_HUMAN	HUMAN	Calnexin OS=Homo sapiens GN=CANX PE=1 SV=2	9.03	9.06	1	5	4	29	17.23	sp|P27824|CALX_HUMAN
137	sp|P25787|PSA2_HUMAN	HUMAN	Proteasome subunit alpha type-2 OS=Homo sapiens GN=PSMA2 PE=1 SV=2	8.88	8.88	1	5	5	19	36.32	sp|P25787|PSA2_HUMAN
138	sp|P20618|PSB1_HUMAN	HUMAN	Proteasome subunit beta type-1 OS=Homo sapiens GN=PSMB1 PE=1 SV=2	8.87	8.87	1	5	4	19	23.65	sp|P20618|PSB1_HUMAN
139	sp|P61160|ARP2_HUMAN	HUMAN	Actin-related protein 2 OS=Homo sapiens GN=ACTR2 PE=1 SV=1	8.84	9.8	1	4	4	11	13.45	sp|P61160|ARP2_HUMAN
140	sp|P43304|GPDM_HUMAN	HUMAN	Glycerol-3-phosphate dehydrogenase, mitochondrial OS=Homo sapiens GN=GPD2 PE=1 SV=2	8.84	9.24	1	4	4	13	8.116	sp|P43304|GPDM_HUMAN
141	sp|P30520|PURA2_HUMAN	HUMAN	Adenylosuccinate synthetase isozyme 2 OS=Homo sapiens GN=ADSS PE=1 SV=3	8.84	8.84	1	4	4	16	10.96	sp|P30520|PURA2_HUMAN
142	sp|P23368|MAOM_HUMAN	HUMAN	NAD-dependent malic enzyme, mitochondrial OS=Homo sapiens GN=ME2 PE=1 SV=1	8.64	8.64	1	4	4	15	13.53	sp|P23368|MAOM_HUMAN
143	sp|P10768|ESTD_HUMAN	HUMAN	S-formylglutathione hydrolase OS=Homo sapiens GN=ESD PE=1 SV=2	8.58	8.58	1	6	4	29	27.66	sp|P10768|ESTD_HUMAN
144	sp|P09211|GSTP1_HUMAN	HUMAN	Glutathione S-transferase P OS=Homo sapiens GN=GSTP1 PE=1 SV=2	8.44	8.44	1	4	3	21	29.52	sp|P09211|GSTP1_HUMAN
145	sp|P23284|PPIB_HUMAN	HUMAN	Peptidyl-prolyl cis-trans isomerase B OS=Homo sapiens GN=PPIB PE=1 SV=1	8.4	8.84	1	4	4	21	21.63	sp|P23284|PPIB_HUMAN
146	sp|P62258|1433E_HUMAN	HUMAN	14-3-3 protein epsilon OS=Homo sapiens GN=YWHAE PE=1 SV=1	8.38	11.89	1	4	4	23	27.84	sp|P62258|1433E_HUMAN
147	sp|P22392|NDKB_HUMAN	HUMAN	Nucleoside diphosphate kinase B OS=Homo sapiens GN=NME2 PE=1 SV=1	8.37	8.37	1	4	4	22	40.13	sp|P22392|NDKB_HUMAN
148	sp|P32320|CDD_HUMAN	HUMAN	Cytidine deaminase OS=Homo sapiens GN=CDA PE=1 SV=2	8.37	8.37	1	7	4	65	65.07	sp|P32320|CDD_HUMAN
149	sp|P19367|HXK1_HUMAN	HUMAN	Hexokinase-1 OS=Homo sapiens GN=HK1 PE=1 SV=3	8.21	10.87	1	4	4	17	7.852	sp|P19367|HXK1_HUMAN
150	sp|P48595|SPB10_HUMAN	HUMAN	Serpin B10 OS=Homo sapiens GN=SERPINB10 PE=1 SV=1	8.18	8.23	1	4	4	12	16.12	sp|P48595|SPB10_HUMAN
151	sp|P51149|RAB7A_HUMAN	HUMAN	Ras-related protein Rab-7a OS=Homo sapiens GN=RAB7A PE=1 SV=1	8.16	8.16	1	4	4	14	28.5	sp|P51149|RAB7A_HUMAN
152	sp|P04839|CY24B_HUMAN	HUMAN	Cytochrome b-245 heavy chain OS=Homo sapiens GN=CYBB PE=1 SV=2	8.11	8.22	1	4	3	57	8.947	sp|P04839|CY24B_HUMAN
153	sp|P14625|ENPL_HUMAN	HUMAN	Endoplasmin OS=Homo sapiens GN=HSP90B1 PE=1 SV=1	8.11	8.19	1	4	4	16	5.106	sp|P14625|ENPL_HUMAN
154	sp|O75368|SH3L1_HUMAN	HUMAN	SH3 domain-binding glutamic acid-rich-like protein OS=Homo sapiens GN=SH3BGRL PE=1 SV=1	8.11	8.11	1	5	4	23	46.49	sp|O75368|SH3L1_HUMAN
155	sp|O00764|PDXK_HUMAN	HUMAN	Pyridoxal kinase OS=Homo sapiens GN=PDXK PE=1 SV=1	8.1	8.1	1	6	4	37	21.79	sp|O00764|PDXK_HUMAN
156	sp|O75594|PGRP_HUMAN	HUMAN	Peptidoglycan recognition protein OS=Homo sapiens GN=PGLYRP1 PE=1 SV=1	8.05	8.49	1	5	4	24	37.24	sp|O75594|PGRP_HUMAN
157	sp|P19971|TYPH_HUMAN	HUMAN	Thymidine phosphorylase OS=Homo sapiens GN=TYMP PE=1 SV=2	8.05	8.13	1	4	4	13	13.9	sp|P19971|TYPH_HUMAN
158	sp|P13645|K1C10_HUMAN	HUMAN	Keratin, type I cytoskeletal 10 OS=Homo sapiens GN=KRT10 PE=1 SV=4	8.04	8.09	1	4	4	8	10.29	sp|P13645|K1C10_HUMAN
159	sp|O95782|AP2A1_HUMAN	HUMAN	AP-2 complex subunit alpha-1 OS=Homo sapiens GN=AP2A1 PE=1 SV=2	8.04	8.06	1	5	4	7	5.118	sp|O95782|AP2A1_HUMAN
160	sp|Q9ULV4|COR1C_HUMAN	HUMAN	Coronin-1C OS=Homo sapiens GN=CORO1C PE=1 SV=1	8	8.66	1	4	4	19	16.46	sp|Q9ULV4|COR1C_HUMAN
161	sp|P38646|GRP75_HUMAN	HUMAN	Stress-70 protein, mitochondrial OS=Homo sapiens GN=HSPA9 PE=1 SV=2	8	8.15	1	4	4	13	7.511	sp|P38646|GRP75_HUMAN
162	sp|P40763|STAT3_HUMAN	HUMAN	Signal transducer and activator of transcription 3 OS=Homo sapiens GN=STAT3 PE=1 SV=2	8	8.07	1	4	4	19	6.753	sp|P40763|STAT3_HUMAN
163	sp|O00754|MA2B1_HUMAN	HUMAN	Lysosomal alpha-mannosidase OS=Homo sapiens GN=MAN2B1 PE=1 SV=3	8	8.01	1	5	4	11	6.924	sp|O00754|MA2B1_HUMAN
164	sp|P15121|ALDR_HUMAN	HUMAN	Aldose reductase OS=Homo sapiens GN=AKR1B1 PE=1 SV=3	8	8	1	4	4	8	21.84	sp|P15121|ALDR_HUMAN
165	sp|P13716|HEM2_HUMAN	HUMAN	Delta-aminolevulinic acid dehydratase OS=Homo sapiens GN=ALAD PE=1 SV=1	8	8	1	4	4	10	29.39	sp|P13716|HEM2_HUMAN
166	sp|P07339|CATD_HUMAN	HUMAN	Cathepsin D OS=Homo sapiens GN=CTSD PE=1 SV=1	8	8	1	4	4	13	16.99	sp|P07339|CATD_HUMAN
167	sp|O43707|ACTN4_HUMAN	HUMAN	Alpha-actinin-4 OS=Homo sapiens GN=ACTN4 PE=1 SV=2	7.87	31.79	1	3	3	5	19.98	sp|O43707|ACTN4_HUMAN
168	sp|Q6P4A8|PLBL1_HUMAN	HUMAN	Putative phospholipase B-like 1 OS=Homo sapiens PE=1 SV=1	7.8	7.8	1	5	4	24	10.33	sp|Q6P4A8|PLBL1_HUMAN
169	sp|P49720|PSB3_HUMAN	HUMAN	Proteasome subunit beta type-3 OS=Homo sapiens GN=PSMB3 PE=1 SV=2	7.8	7.8	1	6	4	14	32.2	sp|P49720|PSB3_HUMAN
170	sp|P02763|A1AG1_HUMAN	HUMAN	Alpha-1-acid glycoprotein 1 OS=Homo sapiens GN=ORM1 PE=1 SV=1	7.71	7.91	1	4	4	14	24.88	sp|P02763|A1AG1_HUMAN
171	sp|P31946|1433B_HUMAN	HUMAN	14-3-3 protein beta/alpha OS=Homo sapiens GN=YWHAB PE=1 SV=3	7.67	11.29	1	5	4	14	26.83	sp|P31946|1433B_HUMAN
172	sp|O75874|IDHC_HUMAN	HUMAN	Isocitrate dehydrogenase [NADP] cytoplasmic OS=Homo sapiens GN=IDH1 PE=1 SV=2	7.67	7.76	1	4	4	18	9.42	sp|O75874|IDHC_HUMAN
173	sp|Q15080|NCF4_HUMAN	HUMAN	Neutrophil cytosol factor 4 OS=Homo sapiens GN=NCF4 PE=1 SV=2	7.64	7.64	1	4	4	17	20.35	sp|Q15080|NCF4_HUMAN
174	sp|Q13231|CHIT1_HUMAN	HUMAN	Chitotriosidase-1 OS=Homo sapiens GN=CHIT1 PE=1 SV=1	7.64	7.64	1	5	4	23	16.95	sp|Q13231|CHIT1_HUMAN
175	sp|Q9H299|SH3L3_HUMAN	HUMAN	SH3 domain-binding glutamic acid-rich-like protein 3 OS=Homo sapiens GN=SH3BGRL3 PE=1 SV=1	7.54	7.54	1	6	4	18	66.67	sp|Q9H299|SH3L3_HUMAN
176	sp|Q13418|ILK_HUMAN	HUMAN	Integrin-linked protein kinase OS=Homo sapiens GN=ILK PE=1 SV=2	7.45	7.45	1	4	4	17	13.5	sp|Q13418|ILK_HUMAN
177	sp|P48444|COPD_HUMAN	HUMAN	Coatomer subunit delta OS=Homo sapiens GN=ARCN1 PE=2 SV=1	7.35	7.35	1	4	4	9	10.18	sp|P48444|COPD_HUMAN
178	sp|P08311|CATG_HUMAN	HUMAN	Cathepsin G OS=Homo sapiens GN=CTSG PE=1 SV=2	7.3	7.3	1	4	3	61	15.69	sp|P08311|CATG_HUMAN
179	sp|P59998|ARPC4_HUMAN	HUMAN	Actin-related protein 2/3 complex subunit 4 OS=Homo sapiens GN=ARPC4 PE=1 SV=3	7.28	7.36	1	6	4	14	27.38	sp|P59998|ARPC4_HUMAN
180	sp|Q9NQC3|RTN4_HUMAN	HUMAN	Reticulon-4 OS=Homo sapiens GN=RTN4 PE=1 SV=2	7.27	7.31	1	4	4	8	4.614	sp|Q9NQC3|RTN4_HUMAN
181	sp|Q9UMX0|UBQL1_HUMAN	HUMAN	Ubiquilin-1 OS=Homo sapiens GN=UBQLN1 PE=1 SV=2	7.26	7.26	1	4	4	8	12.9	sp|Q9UMX0|UBQL1_HUMAN
182	sp|Q13813|SPTA2_HUMAN	HUMAN	Spectrin alpha chain, brain OS=Homo sapiens GN=SPTAN1 PE=1 SV=3	7.25	7.38	1	3	3	12	2.913	sp|Q13813|SPTA2_HUMAN
183	sp|P61626|LYSC_HUMAN	HUMAN	Lysozyme C OS=Homo sapiens GN=LYZ PE=1 SV=1	7.24	7.3	1	7	4	42	25.68	sp|P61626|LYSC_HUMAN
184	sp|Q96G03|PGM2_HUMAN	HUMAN	Phosphoglucomutase-2 OS=Homo sapiens GN=PGM2 PE=1 SV=4	7.18	7.21	1	4	4	14	10.95	sp|Q96G03|PGM2_HUMAN
185	sp|P13473|LAMP2_HUMAN	HUMAN	Lysosome-associated membrane glycoprotein 2 OS=Homo sapiens GN=LAMP2 PE=1 SV=2	7.17	7.17	1	3	3	17	9.512	sp|P13473|LAMP2_HUMAN
186	sp|P47756|CAPZB_HUMAN	HUMAN	F-actin-capping protein subunit beta OS=Homo sapiens GN=CAPZB PE=1 SV=4	7.1	7.1	1	3	3	9	16.25	sp|P47756|CAPZB_HUMAN
187	sp|P20061|TCO1_HUMAN	HUMAN	Transcobalamin-1 OS=Homo sapiens GN=TCN1 PE=1 SV=2	7.07	7.2	1	4	3	6	15.7	sp|P20061|TCO1_HUMAN
188	sp|P10599|THIO_HUMAN	HUMAN	Thioredoxin OS=Homo sapiens GN=TXN PE=1 SV=3	7.04	7.07	1	5	3	26	29.52	sp|P10599|THIO_HUMAN
189	sp|P53396|ACLY_HUMAN	HUMAN	ATP-citrate synthase OS=Homo sapiens GN=ACLY PE=1 SV=3	7.01	7.07	1	4	4	5	4.814	sp|P53396|ACLY_HUMAN
190	sp|Q9H4M9|EHD1_HUMAN	HUMAN	EH domain-containing protein 1 OS=Homo sapiens GN=EHD1 PE=1 SV=2	6.97	7.01	2	4	4	9	8.989	sp|Q9H4M9|EHD1_HUMAN	sp|Q9NZN3|EHD3_HUMAN
191	sp|P68363|TBA1B_HUMAN	HUMAN	Tubulin alpha-1B chain OS=Homo sapiens GN=TUBA1B PE=1 SV=1	6.96	7.03	5	3	3	10	8.869	sp|P68363|TBA1B_HUMAN	sp|P68366|TBA4A_HUMAN	sp|Q9BQE3|TBA1C_HUMAN	sp|Q71U36|TBA1A_HUMAN	sp|Q9NY65|TBA8_HUMAN
192	sp|O15511|ARPC5_HUMAN	HUMAN	Actin-related protein 2/3 complex subunit 5 OS=Homo sapiens GN=ARPC5 PE=1 SV=3	6.93	6.93	1	5	4	10	33.77	sp|O15511|ARPC5_HUMAN
193	sp|Q9NUQ9|FA49B_HUMAN	HUMAN	Protein FAM49B OS=Homo sapiens GN=FAM49B PE=1 SV=1	6.85	6.85	1	4	3	15	14.81	sp|Q9NUQ9|FA49B_HUMAN
194	sp|P26641|EF1G_HUMAN	HUMAN	Elongation factor 1-gamma OS=Homo sapiens GN=EEF1G PE=1 SV=3	6.8	6.8	1	3	3	18	10.53	sp|P26641|EF1G_HUMAN
195	sp|P48735|IDHP_HUMAN	HUMAN	Isocitrate dehydrogenase [NADP], mitochondrial OS=Homo sapiens GN=IDH2 PE=1 SV=2	6.7	6.7	1	3	3	23	6.416	sp|P48735|IDHP_HUMAN
196	sp|P59666|DEF3_HUMAN	HUMAN	Neutrophil defensin 3 OS=Homo sapiens GN=DEFA3 PE=1 SV=1	6.7	6.7	2	3	3	82	25.53	sp|P59666|DEF3_HUMAN	sp|P59665|DEF1_HUMAN
197	sp|P09525|ANXA4_HUMAN	HUMAN	Annexin A4 OS=Homo sapiens GN=ANXA4 PE=1 SV=4	6.6	7.71	1	3	3	13	17.24	sp|P09525|ANXA4_HUMAN
198	sp|P78417|GSTO1_HUMAN	HUMAN	Glutathione transferase omega-1 OS=Homo sapiens GN=GSTO1 PE=1 SV=2	6.6	6.6	1	3	3	17	13.28	sp|P78417|GSTO1_HUMAN
199	sp|Q05315|LPPL_HUMAN	HUMAN	Eosinophil lysophospholipase OS=Homo sapiens GN=CLC PE=1 SV=2	6.56	6.56	1	3	3	8	27.46	sp|Q05315|LPPL_HUMAN
200	sp|P61224|RAP1B_HUMAN	HUMAN	Ras-related protein Rap-1b OS=Homo sapiens GN=RAP1B PE=1 SV=1	6.56	6.56	3	3	3	18	17.93	sp|P61224|RAP1B_HUMAN	sp|P62834|RAP1A_HUMAN	sp|A6NIZ1|RP1BL_HUMAN
201	sp|P26022|PTX3_HUMAN	HUMAN	Pentraxin-related protein PTX3 OS=Homo sapiens GN=PTX3 PE=1 SV=2	6.49	6.49	1	4	3	13	10.5	sp|P26022|PTX3_HUMAN
202	sp|P16284|PECA1_HUMAN	HUMAN	Platelet endothelial cell adhesion molecule OS=Homo sapiens GN=PECAM1 PE=1 SV=1	6.48	6.68	1	3	3	3	6.911	sp|P16284|PECA1_HUMAN
203	sp|O00160|MYO1F_HUMAN	HUMAN	Myosin-If OS=Homo sapiens GN=MYO1F PE=1 SV=2	6.47	6.66	1	4	3	20	4.736	sp|O00160|MYO1F_HUMAN
204	sp|O60610|DIAP1_HUMAN	HUMAN	Protein diaphanous homolog 1 OS=Homo sapiens GN=DIAPH1 PE=1 SV=1	6.47	6.47	1	3	3	17	2.564	sp|O60610|DIAP1_HUMAN
205	sp|O95716|RAB3D_HUMAN	HUMAN	Ras-related protein Rab-3D OS=Homo sapiens GN=RAB3D PE=1 SV=1	6.46	6.47	1	3	3	5	23.29	sp|O95716|RAB3D_HUMAN
206	sp|P80511|S10AC_HUMAN	HUMAN	Protein S100-A12 OS=Homo sapiens GN=S100A12 PE=1 SV=2	6.44	6.49	1	3	3	10	41.3	sp|P80511|S10AC_HUMAN
207	sp|P06748|NPM_HUMAN	HUMAN	Nucleophosmin OS=Homo sapiens GN=NPM1 PE=1 SV=2	6.42	6.43	1	4	4	15	21.43	sp|P06748|NPM_HUMAN
208	sp|Q9ULZ3|ASC_HUMAN	HUMAN	Apoptosis-associated speck-like protein containing a CARD OS=Homo sapiens GN=PYCARD PE=1 SV=2	6.37	6.37	1	3	3	40	22.56	sp|Q9ULZ3|ASC_HUMAN
209	sp|P30101|PDIA3_HUMAN	HUMAN	Protein disulfide-isomerase A3 OS=Homo sapiens GN=PDIA3 PE=1 SV=4	6.35	6.35	1	3	3	31	5.743	sp|P30101|PDIA3_HUMAN
210	sp|O43488|ARK72_HUMAN	HUMAN	Aflatoxin B1 aldehyde reductase member 2 OS=Homo sapiens GN=AKR7A2 PE=1 SV=3	6.33	6.81	1	4	3	12	12.53	sp|O43488|ARK72_HUMAN
211	sp|P06753|TPM3_HUMAN	HUMAN	Tropomyosin alpha-3 chain OS=Homo sapiens GN=TPM3 PE=1 SV=1	6.32	18.48	1	3	3	14	22.89	sp|P06753|TPM3_HUMAN
212	sp|Q14697|GANAB_HUMAN	HUMAN	Neutral alpha-glucosidase AB OS=Homo sapiens GN=GANAB PE=1 SV=3	6.3	6.42	1	3	3	13	5.191	sp|Q14697|GANAB_HUMAN
213	sp|P04843|RPN1_HUMAN	HUMAN	Dolichyl-diphosphooligosaccharide--protein glycosyltransferase subunit 1 OS=Homo sapiens GN=RPN1 PE=1 SV=1	6.27	6.39	1	3	3	11	6.096	sp|P04843|RPN1_HUMAN
214	sp|O00429|DNM1L_HUMAN	HUMAN	Dynamin-1-like protein OS=Homo sapiens GN=DNM1L PE=1 SV=2	6.16	6.2	1	3	3	11	7.473	sp|O00429|DNM1L_HUMAN
215	sp|Q13045|FLII_HUMAN	HUMAN	Protein flightless-1 homolog OS=Homo sapiens GN=FLII PE=1 SV=2	6.14	6.14	1	3	3	9	4.019	sp|Q13045|FLII_HUMAN
216	sp|P40197|GPV_HUMAN	HUMAN	Platelet glycoprotein V OS=Homo sapiens GN=GP5 PE=1 SV=1	6.14	6.14	1	4	3	10	11.43	sp|P40197|GPV_HUMAN
217	sp|P06703|S10A6_HUMAN	HUMAN	Protein S100-A6 OS=Homo sapiens GN=S100A6 PE=1 SV=1	6.13	6.13	1	2	2	2	46.67	sp|P06703|S10A6_HUMAN
218	sp|P46976|GLYG_HUMAN	HUMAN	Glycogenin-1 OS=Homo sapiens GN=GYG1 PE=1 SV=4	6.12	6.13	1	3	3	11	12	sp|P46976|GLYG_HUMAN
219	sp|P62158|CALM_HUMAN	HUMAN	Calmodulin OS=Homo sapiens GN=CALM1 PE=1 SV=2	6.12	6.12	1	5	3	26	44.97	sp|P62158|CALM_HUMAN
220	sp|O95466|FMNL_HUMAN	HUMAN	Formin-like protein 1 OS=Homo sapiens GN=FMNL1 PE=1 SV=2	6.09	6.71	1	3	3	10	4.364	sp|O95466|FMNL_HUMAN
221	sp|Q15084|PDIA6_HUMAN	HUMAN	Protein disulfide-isomerase A6 OS=Homo sapiens GN=PDIA6 PE=1 SV=1	6.09	6.12	1	4	3	13	11.59	sp|Q15084|PDIA6_HUMAN
222	sp|Q70J99|UN13D_HUMAN	HUMAN	Protein unc-13 homolog D OS=Homo sapiens GN=UNC13D PE=1 SV=1	6.08	6.17	1	3	3	10	5.688	sp|Q70J99|UN13D_HUMAN
223	sp|P30487|1B49_HUMAN	HUMAN	HLA class I histocompatibility antigen, B-49 alpha chain OS=Homo sapiens GN=HLA-B PE=2 SV=2	6.08	6.08	13	3	3	8	13.81	sp|P30487|1B49_HUMAN	sp|P30488|1B50_HUMAN	sp|P30484|1B46_HUMAN	sp|P30495|1B56_HUMAN	sp|P30685|1B35_HUMAN	sp|P30498|1B78_HUMAN	sp|P30491|1B53_HUMAN	sp|P30464|1B15_HUMAN	sp|P30490|1B52_HUMAN	sp|P18464|1B51_HUMAN
224	sp|P12724|ECP_HUMAN	HUMAN	Eosinophil cationic protein OS=Homo sapiens GN=RNASE3 PE=1 SV=2	6.06	6.15	1	4	3	26	26.88	sp|P12724|ECP_HUMAN
225	sp|P40939|ECHA_HUMAN	HUMAN	Trifunctional enzyme subunit alpha, mitochondrial OS=Homo sapiens GN=HADHA PE=1 SV=2	6.04	6.12	1	4	3	6	6.16	sp|P40939|ECHA_HUMAN
226	sp|P13010|KU86_HUMAN	HUMAN	ATP-dependent DNA helicase 2 subunit 2 OS=Homo sapiens GN=XRCC5 PE=1 SV=3	6.04	6.04	1	4	3	15	6.694	sp|P13010|KU86_HUMAN
227	sp|O75131|CPNE3_HUMAN	HUMAN	Copine-3 OS=Homo sapiens GN=CPNE3 PE=1 SV=1	6.04	6.04	1	3	3	5	7.635	sp|O75131|CPNE3_HUMAN
228	sp|P08631|HCK_HUMAN	HUMAN	Tyrosine-protein kinase HCK OS=Homo sapiens GN=HCK PE=1 SV=5	6.03	8.12	1	3	3	11	9.316	sp|P08631|HCK_HUMAN
229	sp|Q99829|CPNE1_HUMAN	HUMAN	Copine-1 OS=Homo sapiens GN=CPNE1 PE=2 SV=1	6.02	6.02	1	4	3	30	9.311	sp|Q99829|CPNE1_HUMAN
230	sp|Q9UJ70|NAGK_HUMAN	HUMAN	N-acetyl-D-glucosamine kinase OS=Homo sapiens GN=NAGK PE=1 SV=4	6.02	6.02	1	3	3	8	15.12	sp|Q9UJ70|NAGK_HUMAN
231	sp|P62988|UBIQ_HUMAN	HUMAN	Ubiquitin OS=Homo sapiens GN=RPS27A PE=1 SV=1	6	7.26	1	3	3	24	52.63	sp|P62988|UBIQ_HUMAN
232	sp|P23381|SYWC_HUMAN	HUMAN	Tryptophanyl-tRNA synthetase, cytoplasmic OS=Homo sapiens GN=WARS PE=1 SV=2	6	6.09	1	4	3	19	11.25	sp|P23381|SYWC_HUMAN
233	sp|P10153|RNAS2_HUMAN	HUMAN	Non-secretory ribonuclease OS=Homo sapiens GN=RNASE2 PE=1 SV=2	6	6.08	1	4	3	13	21.12	sp|P10153|RNAS2_HUMAN
234	sp|P25789|PSA4_HUMAN	HUMAN	Proteasome subunit alpha type-4 OS=Homo sapiens GN=PSMA4 PE=1 SV=1	6	6.03	1	4	3	20	21.46	sp|P25789|PSA4_HUMAN
235	sp|P13807|GYS1_HUMAN	HUMAN	Glycogen [starch] synthase, muscle OS=Homo sapiens GN=GYS1 PE=1 SV=2	6	6	1	3	3	13	5.427	sp|P13807|GYS1_HUMAN
236	sp|P05771|KPCB_HUMAN	HUMAN	Protein kinase C beta type OS=Homo sapiens GN=PRKCB1 PE=1 SV=4	6	6	1	3	3	7	5.663	sp|P05771|KPCB_HUMAN
237	sp|P04179|SODM_HUMAN	HUMAN	Superoxide dismutase [Mn], mitochondrial OS=Homo sapiens GN=SOD2 PE=1 SV=2	6	6	1	4	3	18	21.62	sp|P04179|SODM_HUMAN
238	sp|P00441|SODC_HUMAN	HUMAN	Superoxide dismutase [Cu-Zn] OS=Homo sapiens GN=SOD1 PE=1 SV=2	6	6	1	3	3	10	38.96	sp|P00441|SODC_HUMAN
239	sp|Q9BWD1|THIC_HUMAN	HUMAN	Acetyl-CoA acetyltransferase, cytosolic OS=Homo sapiens GN=ACAT2 PE=1 SV=2	6	6	1	3	3	9	18.64	sp|Q9BWD1|THIC_HUMAN
240	sp|Q9BRF8|CSTP1_HUMAN	HUMAN	Uncharacterized metallophosphoesterase CSTP1 OS=Homo sapiens GN=CSTP1 PE=1 SV=2	6	6	1	3	3	16	13.69	sp|Q9BRF8|CSTP1_HUMAN
241	sp|P49247|RPIA_HUMAN	HUMAN	Ribose-5-phosphate isomerase OS=Homo sapiens GN=RPIA PE=1 SV=3	6	6	1	3	3	6	15.76	sp|P49247|RPIA_HUMAN
242	sp|P02776|PLF4_HUMAN	HUMAN	Platelet factor 4 OS=Homo sapiens GN=PF4 PE=1 SV=2	5.99	5.99	1	3	3	60	34.65	sp|P02776|PLF4_HUMAN
243	sp|P67775|PP2AA_HUMAN	HUMAN	Serine/threonine-protein phosphatase 2A catalytic subunit alpha isoform OS=Homo sapiens GN=PPP2CA PE=1 SV=1	5.96	5.96	2	3	3	13	14.56	sp|P67775|PP2AA_HUMAN	sp|P62714|PP2AB_HUMAN
244	sp|P04275|VWF_HUMAN	HUMAN	von Willebrand factor OS=Homo sapiens GN=VWF PE=1 SV=2	5.95	6	1	3	3	9	1.529	sp|P04275|VWF_HUMAN
245	sp|P07602|SAP_HUMAN	HUMAN	Proactivator polypeptide OS=Homo sapiens GN=PSAP PE=1 SV=2	5.93	6	1	3	3	11	8.588	sp|P07602|SAP_HUMAN
246	sp|O60506|HNRPQ_HUMAN	HUMAN	Heterogeneous nuclear ribonucleoprotein Q OS=Homo sapiens GN=SYNCRIP PE=1 SV=2	5.88	5.88	1	3	3	10	6.26	sp|O60506|HNRPQ_HUMAN
247	sp|P00390|GSHR_HUMAN	HUMAN	Glutathione reductase, mitochondrial OS=Homo sapiens GN=GSR PE=1 SV=2	5.81	5.81	1	3	3	14	8.812	sp|P00390|GSHR_HUMAN
248	sp|P54920|SNAA_HUMAN	HUMAN	Alpha-soluble NSF attachment protein OS=Homo sapiens GN=NAPA PE=1 SV=3	5.7	5.7	1	3	3	13	13.56	sp|P54920|SNAA_HUMAN
249	sp|Q9HBI6|CP4FB_HUMAN	HUMAN	Cytochrome P450 4F11 OS=Homo sapiens GN=CYP4F11 PE=2 SV=2	5.69	5.69	3	3	3	16	8.206	sp|Q9HBI6|CP4FB_HUMAN	sp|Q08477|CP4F3_HUMAN	sp|P78329|CP4F2_HUMAN
250	sp|Q01813|K6PP_HUMAN	HUMAN	6-phosphofructokinase type C OS=Homo sapiens GN=PFKP PE=1 SV=2	5.64	5.87	1	3	3	7	6.25	sp|Q01813|K6PP_HUMAN
251	sp|P09917|LOX5_HUMAN	HUMAN	Arachidonate 5-lipoxygenase OS=Homo sapiens GN=ALOX5 PE=1 SV=2	5.64	5.65	1	3	2	5	5.786	sp|P09917|LOX5_HUMAN
252	sp|Q14204|DYHC1_HUMAN	HUMAN	Cytoplasmic dynein 1 heavy chain 1 OS=Homo sapiens GN=DYNC1H1 PE=1 SV=5	5.63	6.66	1	3	3	4	0.861	sp|Q14204|DYHC1_HUMAN
253	sp|P61026|RAB10_HUMAN	HUMAN	Ras-related protein Rab-10 OS=Homo sapiens GN=RAB10 PE=1 SV=1	5.62	7.47	1	3	3	7	19.5	sp|P61026|RAB10_HUMAN
254	sp|Q6WKZ4|RFIP1_HUMAN	HUMAN	Rab11 family-interacting protein 1 OS=Homo sapiens GN=RAB11FIP1 PE=1 SV=2	5.56	5.62	1	3	3	6	4.365	sp|Q6WKZ4|RFIP1_HUMAN
255	sp|P04632|CPNS1_HUMAN	HUMAN	Calpain small subunit 1 OS=Homo sapiens GN=CAPNS1 PE=1 SV=1	5.54	5.54	1	4	3	18	18.28	sp|P04632|CPNS1_HUMAN
256	sp|P12956|KU70_HUMAN	HUMAN	ATP-dependent DNA helicase 2 subunit 1 OS=Homo sapiens GN=XRCC6 PE=1 SV=2	5.52	5.52	1	2	2	7	6.404	sp|P12956|KU70_HUMAN
257	sp|P55263|ADK_HUMAN	HUMAN	Adenosine kinase OS=Homo sapiens GN=ADK PE=1 SV=2	5.45	5.45	1	3	3	8	19.89	sp|P55263|ADK_HUMAN
258	sp|P48059|LIMS1_HUMAN	HUMAN	LIM and senescent cell antigen-like-containing domain protein 1 OS=Homo sapiens GN=LIMS1 PE=1 SV=4	5.42	5.42	1	3	3	3	12.31	sp|P48059|LIMS1_HUMAN
259	sp|P13489|RINI_HUMAN	HUMAN	Ribonuclease inhibitor OS=Homo sapiens GN=RNH1 PE=1 SV=2	5.4	5.4	1	5	3	19	12.15	sp|P13489|RINI_HUMAN
260	sp|Q96AP7|ESAM_HUMAN	HUMAN	Endothelial cell-selective adhesion molecule OS=Homo sapiens GN=ESAM PE=1 SV=1	5.33	5.33	1	3	3	8	12.05	sp|Q96AP7|ESAM_HUMAN
261	sp|P14598|NCF1_HUMAN	HUMAN	Neutrophil cytosol factor 1 OS=Homo sapiens GN=NCF1 PE=1 SV=2	5.28	5.34	3	3	3	11	7.436	sp|P14598|NCF1_HUMAN	sp|A6NI72|NCF1B_HUMAN	sp|A8MVU1|NCF1C_HUMAN
262	sp|P52565|GDIR1_HUMAN	HUMAN	Rho GDP-dissociation inhibitor 1 OS=Homo sapiens GN=ARHGDIA PE=1 SV=3	5.24	5.34	1	2	2	9	18.63	sp|P52565|GDIR1_HUMAN
263	sp|Q12913|PTPRJ_HUMAN	HUMAN	Receptor-type tyrosine-protein phosphatase eta OS=Homo sapiens GN=PTPRJ PE=1 SV=3	5.1	5.17	1	3	3	5	3.515	sp|Q12913|PTPRJ_HUMAN
264	sp|P40121|CAPG_HUMAN	HUMAN	Macrophage-capping protein OS=Homo sapiens GN=CAPG PE=1 SV=1	5.08	5.1	1	2	2	20	8.333	sp|P40121|CAPG_HUMAN
265	sp|P31949|S10AB_HUMAN	HUMAN	Protein S100-A11 OS=Homo sapiens GN=S100A11 PE=1 SV=2	5.05	5.05	1	2	2	22	25.71	sp|P31949|S10AB_HUMAN
266	sp|P25786|PSA1_HUMAN	HUMAN	Proteasome subunit alpha type-1 OS=Homo sapiens GN=PSMA1 PE=1 SV=1	4.98	4.98	1	2	2	7	20.53	sp|P25786|PSA1_HUMAN
267	sp|Q07021|C1QBP_HUMAN	HUMAN	Complement component 1 Q subcomponent-binding protein, mitochondrial OS=Homo sapiens GN=C1QBP PE=1 SV=1	4.97	4.97	1	2	2	4	21.63	sp|Q07021|C1QBP_HUMAN
268	sp|P30740|ILEU_HUMAN	HUMAN	Leukocyte elastase inhibitor OS=Homo sapiens GN=SERPINB1 PE=1 SV=1	4.92	4.92	1	2	2	8	11.08	sp|P30740|ILEU_HUMAN
269	sp|P51692|STA5B_HUMAN	HUMAN	Signal transducer and activator of transcription 5B OS=Homo sapiens GN=STAT5B PE=1 SV=2	4.89	5.82	2	3	3	3	4.828	sp|P51692|STA5B_HUMAN	sp|P42229|STA5A_HUMAN
270	sp|Q5VW32|BROX_HUMAN	HUMAN	BRO1 domain-containing protein BROX OS=Homo sapiens GN=BROX PE=1 SV=1	4.81	4.85	1	2	2	8	11.44	sp|Q5VW32|BROX_HUMAN
271	sp|O00151|PDLI1_HUMAN	HUMAN	PDZ and LIM domain protein 1 OS=Homo sapiens GN=PDLIM1 PE=1 SV=4	4.52	4.52	1	3	3	7	10.94	sp|O00151|PDLI1_HUMAN
272	sp|Q01082|SPTB2_HUMAN	HUMAN	Spectrin beta chain, brain 1 OS=Homo sapiens GN=SPTBN1 PE=1 SV=2	4.5	6.21	1	2	2	5	1.438	sp|Q01082|SPTB2_HUMAN
273	sp|P11279|LAMP1_HUMAN	HUMAN	Lysosome-associated membrane glycoprotein 1 OS=Homo sapiens GN=LAMP1 PE=1 SV=3	4.49	4.49	1	3	2	9	5.755	sp|P11279|LAMP1_HUMAN
274	sp|P61978|HNRPK_HUMAN	HUMAN	Heterogeneous nuclear ribonucleoprotein K OS=Homo sapiens GN=HNRNPK PE=1 SV=1	4.47	4.47	1	2	2	7	6.048	sp|P61978|HNRPK_HUMAN
275	sp|O75563|SKAP2_HUMAN	HUMAN	Src kinase-associated phosphoprotein 2 OS=Homo sapiens GN=SKAP2 PE=1 SV=1	4.45	4.45	1	2	2	2	7.799	sp|O75563|SKAP2_HUMAN
276	sp|P30048|PRDX3_HUMAN	HUMAN	Thioredoxin-dependent peroxide reductase, mitochondrial OS=Homo sapiens GN=PRDX3 PE=1 SV=3	4.45	4.45	1	2	2	13	10.16	sp|P30048|PRDX3_HUMAN
277	sp|P78527|PRKDC_HUMAN	HUMAN	DNA-dependent protein kinase catalytic subunit OS=Homo sapiens GN=PRKDC PE=1 SV=3	4.35	4.4	1	2	2	3	0.6298	sp|P78527|PRKDC_HUMAN
278	sp|P15144|AMPN_HUMAN	HUMAN	Aminopeptidase N OS=Homo sapiens GN=ANPEP PE=1 SV=4	4.34	4.38	1	3	2	11	4.033	sp|P15144|AMPN_HUMAN
279	sp|P55008|AIF1_HUMAN	HUMAN	Allograft inflammatory factor 1 OS=Homo sapiens GN=AIF1 PE=1 SV=1	4.34	4.34	1	2	2	5	25.85	sp|P55008|AIF1_HUMAN
280	sp|O75390|CISY_HUMAN	HUMAN	Citrate synthase, mitochondrial OS=Homo sapiens GN=CS PE=1 SV=2	4.32	4.32	1	2	2	13	5.794	sp|O75390|CISY_HUMAN
281	sp|P50552|VASP_HUMAN	HUMAN	Vasodilator-stimulated phosphoprotein OS=Homo sapiens GN=VASP PE=1 SV=3	4.31	4.33	1	2	2	10	7.895	sp|P50552|VASP_HUMAN
282	sp|Q8WUM4|PDC6I_HUMAN	HUMAN	Programmed cell death 6-interacting protein OS=Homo sapiens GN=PDCD6IP PE=1 SV=1	4.3	4.62	1	3	2	9	3.802	sp|Q8WUM4|PDC6I_HUMAN
283	sp|O14818|PSA7_HUMAN	HUMAN	Proteasome subunit alpha type-7 OS=Homo sapiens GN=PSMA7 PE=1 SV=1	4.3	4.32	1	2	2	7	13.71	sp|O14818|PSA7_HUMAN
284	sp|Q27J81|INF2_HUMAN	HUMAN	Inverted formin-2 OS=Homo sapiens GN=INF2 PE=1 SV=2	4.26	4.86	1	2	2	7	2.162	sp|Q27J81|INF2_HUMAN
285	sp|P22234|PUR6_HUMAN	HUMAN	Multifunctional protein ADE2 OS=Homo sapiens GN=PAICS PE=1 SV=3	4.24	4.24	1	2	2	5	5.882	sp|P22234|PUR6_HUMAN
286	sp|Q9UBW5|BIN2_HUMAN	HUMAN	Bridging integrator 2 OS=Homo sapiens GN=BIN2 PE=1 SV=3	4.23	4.23	1	2	2	3	7.611	sp|Q9UBW5|BIN2_HUMAN
287	sp|P11216|PYGB_HUMAN	HUMAN	Glycogen phosphorylase, brain form OS=Homo sapiens GN=PYGB PE=1 SV=5	4.22	8.4	1	2	2	13	6.406	sp|P11216|PYGB_HUMAN
288	sp|Q15907|RB11B_HUMAN	HUMAN	Ras-related protein Rab-11B OS=Homo sapiens GN=RAB11B PE=1 SV=4	4.18	4.2	2	2	2	16	10.55	sp|Q15907|RB11B_HUMAN	sp|P62491|RB11A_HUMAN
289	sp|P09467|F16P1_HUMAN	HUMAN	Fructose-1,6-bisphosphatase 1 OS=Homo sapiens GN=FBP1 PE=1 SV=4	4.16	4.16	1	3	2	17	9.763	sp|P09467|F16P1_HUMAN
290	sp|P38606|VATA_HUMAN	HUMAN	Vacuolar ATP synthase catalytic subunit A OS=Homo sapiens GN=ATP6V1A PE=1 SV=2	4.13	4.23	1	2	2	9	2.755	sp|P38606|VATA_HUMAN
291	sp|Q9BSJ8|ESYT1_HUMAN	HUMAN	Extended-synaptotagmin-1 OS=Homo sapiens GN=FAM62A PE=1 SV=1	4.11	4.57	1	2	2	6	3.442	sp|Q9BSJ8|ESYT1_HUMAN
292	sp|P55060|XPO2_HUMAN	HUMAN	Exportin-2 OS=Homo sapiens GN=CSE1L PE=1 SV=3	4.1	4.1	1	2	2	5	3.296	sp|P55060|XPO2_HUMAN
293	sp|P45974|UBP5_HUMAN	HUMAN	Ubiquitin carboxyl-terminal hydrolase 5 OS=Homo sapiens GN=USP5 PE=1 SV=2	4.09	4.12	1	2	2	3	5.245	sp|P45974|UBP5_HUMAN
294	sp|P42331|RHG25_HUMAN	HUMAN	Rho GTPase-activating protein 25 OS=Homo sapiens GN=ARHGAP25 PE=1 SV=1	4.09	4.09	1	2	2	4	3.918	sp|P42331|RHG25_HUMAN
295	sp|Q92882|OSTF1_HUMAN	HUMAN	Osteoclast-stimulating factor 1 OS=Homo sapiens GN=OSTF1 PE=1 SV=2	4.08	4.14	1	2	2	16	14.49	sp|Q92882|OSTF1_HUMAN
296	sp|Q99598|TSNAX_HUMAN	HUMAN	Translin-associated protein X OS=Homo sapiens GN=TSNAX PE=1 SV=1	4.08	4.11	1	2	2	5	14.14	sp|Q99598|TSNAX_HUMAN
297	sp|Q13011|ECH1_HUMAN	HUMAN	Delta(3,5)-Delta(2,4)-dienoyl-CoA isomerase, mitochondrial OS=Homo sapiens GN=ECH1 PE=1 SV=2	4.08	4.11	1	2	2	12	10.37	sp|Q13011|ECH1_HUMAN
298	sp|P51148|RAB5C_HUMAN	HUMAN	Ras-related protein Rab-5C OS=Homo sapiens GN=RAB5C PE=1 SV=2	4.08	4.09	2	2	2	7	11.57	sp|P51148|RAB5C_HUMAN	sp|P20339|RAB5A_HUMAN
299	sp|P49748|ACADV_HUMAN	HUMAN	Very long-chain specific acyl-CoA dehydrogenase, mitochondrial OS=Homo sapiens GN=ACADVL PE=1 SV=1	4.08	4.08	1	2	2	8	6.26	sp|P49748|ACADV_HUMAN
300	sp|P49327|FAS_HUMAN	HUMAN	Fatty acid synthase OS=Homo sapiens GN=FASN PE=1 SV=2	4.06	4.2	1	2	2	4	1.673	sp|P49327|FAS_HUMAN
301	sp|P54727|RD23B_HUMAN	HUMAN	UV excision repair protein RAD23 homolog B OS=Homo sapiens GN=RAD23B PE=1 SV=1	4.06	4.16	1	2	2	9	7.824	sp|P54727|RD23B_HUMAN
302	sp|P23229|ITA6_HUMAN	HUMAN	Integrin alpha-6 OS=Homo sapiens GN=ITGA6 PE=1 SV=3	4.06	4.1	1	2	2	7	2.124	sp|P23229|ITA6_HUMAN
303	sp|P62879|GBB2_HUMAN	HUMAN	Guanine nucleotide-binding protein G(I)/G(S)/G(T) subunit beta-2 OS=Homo sapiens GN=GNB2 PE=1 SV=3	4.05	4.4	1	3	2	13	12.06	sp|P62879|GBB2_HUMAN
304	sp|P55786|PSA_HUMAN	HUMAN	Puromycin-sensitive aminopeptidase OS=Homo sapiens GN=NPEPPS PE=1 SV=2	4.05	4.11	1	2	2	7	2.72	sp|P55786|PSA_HUMAN
305	sp|P25325|THTM_HUMAN	HUMAN	3-mercaptopyruvate sulfurtransferase OS=Homo sapiens GN=MPST PE=1 SV=3	4.05	4.09	1	2	2	6	9.764	sp|P25325|THTM_HUMAN
306	sp|P00918|CAH2_HUMAN	HUMAN	Carbonic anhydrase 2 OS=Homo sapiens GN=CA2 PE=1 SV=2	4.05	4.06	1	2	2	11	9.615	sp|P00918|CAH2_HUMAN
307	sp|P41250|SYG_HUMAN	HUMAN	Glycyl-tRNA synthetase OS=Homo sapiens GN=GARS PE=1 SV=2	4.05	4.05	1	2	2	7	6.36	sp|P41250|SYG_HUMAN
308	sp|P23526|SAHH_HUMAN	HUMAN	Adenosylhomocysteinase OS=Homo sapiens GN=AHCY PE=1 SV=4	4.04	4.04	1	3	2	11	7.407	sp|P23526|SAHH_HUMAN
309	sp|P68371|TBB2C_HUMAN	HUMAN	Tubulin beta-2C chain OS=Homo sapiens GN=TUBB2C PE=1 SV=1	4.03	4.08	5	2	2	16	5.393	sp|P68371|TBB2C_HUMAN	sp|P04350|TBB4_HUMAN	sp|Q9BVA1|TBB2B_HUMAN	sp|Q13885|TBB2A_HUMAN	sp|P07437|TBB5_HUMAN
310	sp|P36959|GMPR1_HUMAN	HUMAN	GMP reductase 1 OS=Homo sapiens GN=GMPR PE=1 SV=1	4.03	4.03	1	3	2	10	6.377	sp|P36959|GMPR1_HUMAN
311	sp|P10155|RO60_HUMAN	HUMAN	60 kDa SS-A/Ro ribonucleoprotein OS=Homo sapiens GN=TROVE2 PE=1 SV=2	4.02	4.06	1	2	2	6	5.576	sp|P10155|RO60_HUMAN
312	sp|Q13043|STK4_HUMAN	HUMAN	Serine/threonine-protein kinase 4 OS=Homo sapiens GN=STK4 PE=1 SV=2	4.02	4.02	1	2	2	10	6.571	sp|Q13043|STK4_HUMAN
313	sp|P52907|CAZA1_HUMAN	HUMAN	F-actin-capping protein subunit alpha-1 OS=Homo sapiens GN=CAPZA1 PE=1 SV=3	4.02	4.02	2	2	2	12	9.091	sp|P52907|CAZA1_HUMAN	sp|P47755|CAZA2_HUMAN
314	sp|Q9UIQ6|LCAP_HUMAN	HUMAN	Leucyl-cystinyl aminopeptidase OS=Homo sapiens GN=LNPEP PE=1 SV=3	4.01	4.1	1	2	2	2	2.049	sp|Q9UIQ6|LCAP_HUMAN
315	sp|P09622|DLDH_HUMAN	HUMAN	Dihydrolipoyl dehydrogenase, mitochondrial OS=Homo sapiens GN=DLD PE=1 SV=1	4.01	4.03	1	2	2	3	8.841	sp|P09622|DLDH_HUMAN
316	sp|Q99685|MGLL_HUMAN	HUMAN	Monoglyceride lipase OS=Homo sapiens GN=MGLL PE=2 SV=2	4.01	4.03	1	2	2	5	10.23	sp|Q99685|MGLL_HUMAN
317	sp|P17174|AATC_HUMAN	HUMAN	Aspartate aminotransferase, cytoplasmic OS=Homo sapiens GN=GOT1 PE=1 SV=3	4.01	4.01	1	2	2	6	8.232	sp|P17174|AATC_HUMAN
318	sp|P60842|IF4A1_HUMAN	HUMAN	Eukaryotic initiation factor 4A-I OS=Homo sapiens GN=EIF4A1 PE=1 SV=1	4.01	4.01	1	2	2	2	8.374	sp|P60842|IF4A1_HUMAN
319	sp|P27348|1433T_HUMAN	HUMAN	14-3-3 protein theta OS=Homo sapiens GN=YWHAQ PE=1 SV=1	4	7.78	1	3	2	10	24.9	sp|P27348|1433T_HUMAN
320	sp|Q4V328|GRAP1_HUMAN	HUMAN	GRIP1-associated protein 1 OS=Homo sapiens GN=GRIPAP1 PE=1 SV=1	4	4.47	5	2	2	4	2.735	sp|Q4V328|GRAP1_HUMAN	RRRRRsp|A6NNM8|TTL13_HUMAN	RRRRRsp|Q15853|USF2_HUMAN	sp|Q16254|E2F4_HUMAN	RRRRRsp|Q9BVL2|NUPL1_HUMAN
321	sp|Q92888|ARHG1_HUMAN	HUMAN	Rho guanine nucleotide exchange factor 1 OS=Homo sapiens GN=ARHGEF1 PE=1 SV=2	4	4.38	1	2	2	2	4.057	sp|Q92888|ARHG1_HUMAN
322	sp|Q9NPP4|NLRC4_HUMAN	HUMAN	NLR family CARD domain-containing protein 4 OS=Homo sapiens GN=NLRC4 PE=1 SV=2	4	4.27	1	2	2	4	3.223	sp|Q9NPP4|NLRC4_HUMAN
323	sp|Q9UBF2|COPG2_HUMAN	HUMAN	Coatomer subunit gamma-2 OS=Homo sapiens GN=COPG2 PE=1 SV=1	4	4.11	1	2	2	3	4.592	sp|Q9UBF2|COPG2_HUMAN
324	sp|Q0VD83|AB48R_HUMAN	HUMAN	Apolipoprotein B-100 receptor OS=Homo sapiens GN=APOB48R PE=1 SV=1	4	4.09	1	2	2	6	3.033	sp|Q0VD83|AB48R_HUMAN
325	sp|P49354|FNTA_HUMAN	HUMAN	Protein farnesyltransferase/geranylgeranyltransferase type-1 subunit alpha OS=Homo sapiens GN=FNTA PE=1 SV=1	4	4.08	1	2	2	15	7.388	sp|P49354|FNTA_HUMAN
326	sp|Q9HD89|RETN_HUMAN	HUMAN	Resistin OS=Homo sapiens GN=RETN PE=2 SV=1	4	4.07	1	3	2	25	21.3	sp|Q9HD89|RETN_HUMAN
327	sp|P35527|K1C9_HUMAN	HUMAN	Keratin, type I cytoskeletal 9 OS=Homo sapiens GN=KRT9 PE=1 SV=2	4	4.06	1	2	2	2	6.26	sp|P35527|K1C9_HUMAN
328	sp|P31323|KAP3_HUMAN	HUMAN	cAMP-dependent protein kinase type II-beta regulatory subunit OS=Homo sapiens GN=PRKAR2B PE=1 SV=3	4	4.05	1	2	2	3	7.177	sp|P31323|KAP3_HUMAN
329	sp|Q16543|CDC37_HUMAN	HUMAN	Hsp90 co-chaperone Cdc37 OS=Homo sapiens GN=CDC37 PE=1 SV=1	4	4.03	1	2	2	8	9.259	sp|Q16543|CDC37_HUMAN
330	sp|P33121|ACSL1_HUMAN	HUMAN	Long-chain-fatty-acid--CoA ligase 1 OS=Homo sapiens GN=ACSL1 PE=1 SV=1	4	4.03	1	2	2	6	2.722	sp|P33121|ACSL1_HUMAN
331	sp|P30153|2AAA_HUMAN	HUMAN	Serine/threonine-protein phosphatase 2A 65 kDa regulatory subunit A alpha isoform OS=Homo sapiens GN=PPP2R1A PE=1 SV=4	4	4.03	2	3	2	21	5.772	sp|P30153|2AAA_HUMAN	sp|P30154|2AAB_HUMAN
332	sp|O00571|DDX3X_HUMAN	HUMAN	ATP-dependent RNA helicase DDX3X OS=Homo sapiens GN=DDX3X PE=1 SV=3	4	4.02	2	2	2	4	3.323	sp|O00571|DDX3X_HUMAN	sp|O15523|DDX3Y_HUMAN
333	sp|O43143|DHX15_HUMAN	HUMAN	Putative pre-mRNA-splicing factor ATP-dependent RNA helicase DHX15 OS=Homo sapiens GN=DHX15 PE=1 SV=2	4	4.02	1	2	2	3	3.522	sp|O43143|DHX15_HUMAN
334	sp|P21283|VATC1_HUMAN	HUMAN	Vacuolar proton pump subunit C 1 OS=Homo sapiens GN=ATP6V1C1 PE=1 SV=4	4	4.01	1	2	2	10	6.806	sp|P21283|VATC1_HUMAN
335	sp|P50990|TCPQ_HUMAN	HUMAN	T-complex protein 1 subunit theta OS=Homo sapiens GN=CCT8 PE=1 SV=4	4	4.01	1	2	2	5	4.38	sp|P50990|TCPQ_HUMAN
336	sp|Q9NYU2|UGGG1_HUMAN	HUMAN	UDP-glucose:glycoprotein glucosyltransferase 1 OS=Homo sapiens GN=UGCGL1 PE=1 SV=2	4	4	1	3	2	13	2.613	sp|Q9NYU2|UGGG1_HUMAN
337	sp|P51659|DHB4_HUMAN	HUMAN	Peroxisomal multifunctional enzyme type 2 OS=Homo sapiens GN=HSD17B4 PE=1 SV=3	4	4	1	2	2	3	5.571	sp|P51659|DHB4_HUMAN
338	sp|P07910|HNRPC_HUMAN	HUMAN	Heterogeneous nuclear ribonucleoproteins C1/C2 OS=Homo sapiens GN=HNRNPC PE=1 SV=4	4	4	2	2	2	5	8.497	sp|P07910|HNRPC_HUMAN	sp|O60812|HNRCL_HUMAN
339	sp|Q3LXA3|DHAK_HUMAN	HUMAN	Dihydroxyacetone kinase OS=Homo sapiens GN=DAK PE=2 SV=1	4	4	1	2	2	3	5.913	sp|Q3LXA3|DHAK_HUMAN
340	sp|Q16769|QPCT_HUMAN	HUMAN	Glutaminyl-peptide cyclotransferase OS=Homo sapiens GN=QPCT PE=1 SV=1	4	4	1	3	2	12	12.19	sp|Q16769|QPCT_HUMAN
341	sp|P61970|NTF2_HUMAN	HUMAN	Nuclear transport factor 2 OS=Homo sapiens GN=NUTF2 PE=1 SV=1	4	4	1	2	2	6	23.62	sp|P61970|NTF2_HUMAN
342	sp|P13688|CEAM1_HUMAN	HUMAN	Carcinoembryonic antigen-related cell adhesion molecule 1 OS=Homo sapiens GN=CEACAM1 PE=1 SV=2	4	4	1	2	2	5	6.844	sp|P13688|CEAM1_HUMAN
343	sp|P04844|RPN2_HUMAN	HUMAN	Dolichyl-diphosphooligosaccharide--protein glycosyltransferase subunit 2 OS=Homo sapiens GN=RPN2 PE=1 SV=3	4	4	1	2	2	9	4.12	sp|P04844|RPN2_HUMAN
344	sp|P00915|CAH1_HUMAN	HUMAN	Carbonic anhydrase 1 OS=Homo sapiens GN=CA1 PE=1 SV=2	4	4	1	2	2	6	9.962	sp|P00915|CAH1_HUMAN
345	sp|O94903|PROSC_HUMAN	HUMAN	Proline synthetase co-transcribed bacterial homolog protein OS=Homo sapiens GN=PROSC PE=1 SV=1	4	4	1	2	2	4	9.455	sp|O94903|PROSC_HUMAN
346	sp|Q14103|HNRPD_HUMAN	HUMAN	Heterogeneous nuclear ribonucleoprotein D0 OS=Homo sapiens GN=HNRNPD PE=1 SV=1	4	4	2	2	2	9	5.634	sp|Q14103|HNRPD_HUMAN	sp|O14979|HNRDL_HUMAN
347	sp|P06132|DCUP_HUMAN	HUMAN	Uroporphyrinogen decarboxylase OS=Homo sapiens GN=UROD PE=1 SV=2	4	4	1	2	2	5	14.99	sp|P06132|DCUP_HUMAN
348	sp|P04264|K2C1_HUMAN	HUMAN	Keratin, type II cytoskeletal 1 OS=Homo sapiens GN=KRT1 PE=1 SV=5	4	4	1	2	2	6	4.348	sp|P04264|K2C1_HUMAN
349	sp|P01857|IGHG1_HUMAN	HUMAN	Ig gamma-1 chain C region OS=Homo sapiens GN=IGHG1 PE=1 SV=1	4	4	3	2	2	10	10	sp|P01857|IGHG1_HUMAN	sp|P01861|IGHG4_HUMAN	sp|P01860|IGHG3_HUMAN
350	sp|O14579|COPE_HUMAN	HUMAN	Coatomer subunit epsilon OS=Homo sapiens GN=COPE PE=2 SV=3	4	4	1	2	2	7	12.99	sp|O14579|COPE_HUMAN
351	sp|Q9Y333|LSM2_HUMAN	HUMAN	U6 snRNA-associated Sm-like protein LSm2 OS=Homo sapiens GN=LSM2 PE=1 SV=1	4	4	1	2	2	5	28.42	sp|Q9Y333|LSM2_HUMAN
352	sp|Q96CN7|ISOC1_HUMAN	HUMAN	Isochorismatase domain-containing protein 1 OS=Homo sapiens GN=ISOC1 PE=1 SV=3	4	4	1	2	2	3	11.07	sp|Q96CN7|ISOC1_HUMAN
353	sp|P28070|PSB4_HUMAN	HUMAN	Proteasome subunit beta type-4 OS=Homo sapiens GN=PSMB4 PE=1 SV=4	4	4	1	2	2	12	16.67	sp|P28070|PSB4_HUMAN
354	sp|P16930|FAAA_HUMAN	HUMAN	Fumarylacetoacetase OS=Homo sapiens GN=FAH PE=1 SV=2	4	4	1	2	2	8	9.785	sp|P16930|FAAA_HUMAN
355	sp|P09486|SPRC_HUMAN	HUMAN	SPARC OS=Homo sapiens GN=SPARC PE=1 SV=1	4	4	1	2	2	7	14.85	sp|P09486|SPRC_HUMAN
356	sp|O95777|LSM8_HUMAN	HUMAN	U6 snRNA-associated Sm-like protein LSm8 OS=Homo sapiens GN=LSM8 PE=1 SV=3	4	4	1	2	2	7	41.67	sp|O95777|LSM8_HUMAN
357	sp|Q13555|KCC2G_HUMAN	HUMAN	Calcium/calmodulin-dependent protein kinase type II gamma chain OS=Homo sapiens GN=CAMK2G PE=1 SV=3	3.94	4.05	1	3	2	3	3.943	sp|Q13555|KCC2G_HUMAN
358	sp|Q16555|DPYL2_HUMAN	HUMAN	Dihydropyrimidinase-related protein 2 OS=Homo sapiens GN=DPYSL2 PE=1 SV=1	3.93	3.94	1	2	2	2	8.566	sp|Q16555|DPYL2_HUMAN
359	sp|P15153|RAC2_HUMAN	HUMAN	Ras-related C3 botulinum toxin substrate 2 OS=Homo sapiens GN=RAC2 PE=1 SV=1	3.87	3.88	7	2	2	12	9.896	sp|P15153|RAC2_HUMAN	sp|P60953|CDC42_HUMAN	sp|P63000|RAC1_HUMAN	sp|P60763|RAC3_HUMAN	sp|Q9H4E5|RHOJ_HUMAN	sp|P84095|RHOG_HUMAN	sp|P17081|RHOQ_HUMAN
360	sp|P25705|ATPA_HUMAN	HUMAN	ATP synthase subunit alpha, mitochondrial OS=Homo sapiens GN=ATP5A1 PE=1 SV=1	3.86	3.86	1	2	2	2	5.606	sp|P25705|ATPA_HUMAN
361	sp|Q96HE7|ERO1A_HUMAN	HUMAN	ERO1-like protein alpha OS=Homo sapiens GN=ERO1L PE=1 SV=2	3.85	3.86	1	2	2	5	5.556	sp|Q96HE7|ERO1A_HUMAN
362	sp|P30086|PEBP1_HUMAN	HUMAN	Phosphatidylethanolamine-binding protein 1 OS=Homo sapiens GN=PEBP1 PE=1 SV=3	3.81	3.81	1	2	2	3	20.32	sp|P30086|PEBP1_HUMAN
363	sp|Q15942|ZYX_HUMAN	HUMAN	Zyxin OS=Homo sapiens GN=ZYX PE=1 SV=1	3.81	3.81	1	3	2	13	6.993	sp|Q15942|ZYX_HUMAN
364	sp|Q96C19|EFHD2_HUMAN	HUMAN	EF-hand domain-containing protein D2 OS=Homo sapiens GN=EFHD2 PE=1 SV=1	3.79	3.79	2	2	2	2	9.167	sp|Q96C19|EFHD2_HUMAN	sp|Q9BUP0|EFHD1_HUMAN
365	sp|P28062|PSB8_HUMAN	HUMAN	Proteasome subunit beta type-8 OS=Homo sapiens GN=PSMB8 PE=1 SV=2	3.74	3.74	1	2	2	2	14.13	sp|P28062|PSB8_HUMAN
366	sp|Q9BRA2|TXD17_HUMAN	HUMAN	Thioredoxin domain-containing protein 17 OS=Homo sapiens GN=TXNDC17 PE=1 SV=1	3.74	3.74	1	2	2	3	23.58	sp|Q9BRA2|TXD17_HUMAN
367	sp|P02750|A2GL_HUMAN	HUMAN	Leucine-rich alpha-2-glycoprotein OS=Homo sapiens GN=LRG1 PE=1 SV=2	3.72	3.74	1	2	2	2	11.24	sp|P02750|A2GL_HUMAN
368	sp|P54108|CRIS3_HUMAN	HUMAN	Cysteine-rich secretory protein 3 OS=Homo sapiens GN=CRISP3 PE=1 SV=1	3.67	3.69	1	2	2	4	15.1	sp|P54108|CRIS3_HUMAN
369	sp|P28838|AMPL_HUMAN	HUMAN	Cytosol aminopeptidase OS=Homo sapiens GN=LAP3 PE=1 SV=3	3.62	3.74	1	3	2	4	5.588	sp|P28838|AMPL_HUMAN
370	sp|Q06323|PSME1_HUMAN	HUMAN	Proteasome activator complex subunit 1 OS=Homo sapiens GN=PSME1 PE=1 SV=1	3.6	3.6	1	2	2	3	10.04	sp|Q06323|PSME1_HUMAN
371	sp|Q9Y376|CAB39_HUMAN	HUMAN	Calcium-binding protein 39 OS=Homo sapiens GN=CAB39 PE=1 SV=1	3.58	3.6	1	2	2	3	6.452	sp|Q9Y376|CAB39_HUMAN
372	sp|Q06830|PRDX1_HUMAN	HUMAN	Peroxiredoxin-1 OS=Homo sapiens GN=PRDX1 PE=1 SV=1	3.58	3.59	1	2	2	2	9.045	sp|Q06830|PRDX1_HUMAN
373	sp|P35232|PHB_HUMAN	HUMAN	Prohibitin OS=Homo sapiens GN=PHB PE=1 SV=1	3.54	3.58	1	2	2	4	11.4	sp|P35232|PHB_HUMAN
374	sp|P49902|5NTC_HUMAN	HUMAN	Cytosolic purine 5'-nucleotidase OS=Homo sapiens GN=NT5C2 PE=1 SV=1	3.52	3.52	1	2	2	5	5.526	sp|P49902|5NTC_HUMAN
375	sp|Q29963|1C06_HUMAN	HUMAN	HLA class I histocompatibility antigen, Cw-6 alpha chain OS=Homo sapiens GN=HLA-C PE=2 SV=2	3.5	3.55	31	1	1	6	9.836	sp|Q29963|1C06_HUMAN	sp|Q29940|1B59_HUMAN	sp|P30493|1B55_HUMAN	sp|P30462|1B14_HUMAN	sp|P18463|1B37_HUMAN	sp|P30466|1B18_HUMAN	sp|P30492|1B54_HUMAN	sp|P30479|1B41_HUMAN	sp|P30460|1B08_HUMAN	sp|P30480|1B42_HUMAN
376	sp|P28066|PSA5_HUMAN	HUMAN	Proteasome subunit alpha type-5 OS=Homo sapiens GN=PSMA5 PE=1 SV=3	3.46	3.47	1	2	2	9	12.86	sp|P28066|PSA5_HUMAN
377	sp|Q9Y624|JAM1_HUMAN	HUMAN	Junctional adhesion molecule A OS=Homo sapiens GN=F11R PE=1 SV=1	3.42	3.42	1	2	2	3	10.37	sp|Q9Y624|JAM1_HUMAN
378	sp|P07814|SYEP_HUMAN	HUMAN	Bifunctional aminoacyl-tRNA synthetase OS=Homo sapiens GN=EPRS PE=1 SV=3	3.41	3.41	1	2	2	5	1.72	sp|P07814|SYEP_HUMAN
379	sp|Q13404|UB2V1_HUMAN	HUMAN	Ubiquitin-conjugating enzyme E2 variant 1 OS=Homo sapiens GN=UBE2V1 PE=1 SV=1	3.37	3.42	2	2	2	3	14.03	sp|Q13404|UB2V1_HUMAN	sp|Q15819|UB2V2_HUMAN
380	sp|Q00325|MPCP_HUMAN	HUMAN	Phosphate carrier protein, mitochondrial OS=Homo sapiens GN=SLC25A3 PE=1 SV=2	3.32	3.32	1	2	2	2	6.63	sp|Q00325|MPCP_HUMAN
381	sp|Q6ICL3|CV025_HUMAN	HUMAN	Uncharacterized protein C22orf25 OS=Homo sapiens GN=C22orf25 PE=2 SV=1	3.29	3.29	1	2	2	2	13.77	sp|Q6ICL3|CV025_HUMAN
382	sp|P08238|HS90B_HUMAN	HUMAN	Heat shock protein HSP 90-beta OS=Homo sapiens GN=HSP90AB1 PE=1 SV=4	3.28	10	1	1	1	3	8.564	sp|P08238|HS90B_HUMAN
383	sp|P26640|SYVC_HUMAN	HUMAN	Valyl-tRNA synthetase OS=Homo sapiens GN=VARS PE=1 SV=4	3.27	3.32	1	2	2	4	2.057	sp|P26640|SYVC_HUMAN
384	sp|Q04917|1433F_HUMAN	HUMAN	14-3-3 protein eta OS=Homo sapiens GN=YWHAH PE=1 SV=4	3.25	6.85	1	2	2	2	18.7	sp|Q04917|1433F_HUMAN
385	sp|Q9ULH1|DDEF1_HUMAN	HUMAN	130 kDa phosphatidylinositol 4,5-biphosphate-dependent ARF1 GTPase-activating protein OS=Homo sapiens GN=DDEF1 PE=1 SV=3	3.25	3.58	1	2	2	2	1.683	sp|Q9ULH1|DDEF1_HUMAN
386	sp|Q9NQR4|NIT2_HUMAN	HUMAN	Nitrilase homolog 2 OS=Homo sapiens GN=NIT2 PE=1 SV=1	3.23	3.23	1	1	1	3	15.22	sp|Q9NQR4|NIT2_HUMAN
387	sp|Q6DD88|ATLA3_HUMAN	HUMAN	Atlastin-3 OS=Homo sapiens GN=ATL3 PE=1 SV=1	3.21	3.24	2	2	2	6	2.957	sp|Q6DD88|ATLA3_HUMAN	sp|Q8NHH9|ATLA2_HUMAN
388	sp|P18054|LOX12_HUMAN	HUMAN	Arachidonate 12-lipoxygenase, 12S-type OS=Homo sapiens GN=ALOX12 PE=1 SV=4	3.19	3.19	1	2	2	2	6.787	sp|P18054|LOX12_HUMAN
389	sp|P10619|PPGB_HUMAN	HUMAN	Lysosomal protective protein OS=Homo sapiens GN=CTSA PE=1 SV=2	3.1	3.1	1	2	1	2	6.042	sp|P10619|PPGB_HUMAN
390	sp|P19338|NUCL_HUMAN	HUMAN	Nucleolin OS=Homo sapiens GN=NCL PE=1 SV=3	3.04	3.04	1	2	2	2	3.944	sp|P19338|NUCL_HUMAN
391	sp|Q9Y5Z4|HEBP2_HUMAN	HUMAN	Heme-binding protein 2 OS=Homo sapiens GN=HEBP2 PE=1 SV=1	3.03	3.04	1	2	2	4	10.24	sp|Q9Y5Z4|HEBP2_HUMAN
392	sp|P28676|GRAN_HUMAN	HUMAN	Grancalcin OS=Homo sapiens GN=GCA PE=1 SV=2	3.03	3.03	1	2	2	4	8.295	sp|P28676|GRAN_HUMAN
393	sp|P42574|CASP3_HUMAN	HUMAN	Caspase-3 OS=Homo sapiens GN=CASP3 PE=1 SV=2	2.97	2.97	1	2	2	3	11.55	sp|P42574|CASP3_HUMAN
394	sp|P11233|RALA_HUMAN	HUMAN	Ras-related protein Ral-A OS=Homo sapiens GN=RALA PE=1 SV=1	2.97	2.97	2	2	2	2	15.05	sp|P11233|RALA_HUMAN	sp|P11234|RALB_HUMAN
395	sp|P60981|DEST_HUMAN	HUMAN	Destrin OS=Homo sapiens GN=DSTN PE=1 SV=3	2.95	3.37	1	2	2	5	18.18	sp|P60981|DEST_HUMAN
396	sp|O15145|ARPC3_HUMAN	HUMAN	Actin-related protein 2/3 complex subunit 3 OS=Homo sapiens GN=ARPC3 PE=1 SV=3	2.9	2.96	1	1	1	3	3.933	sp|O15145|ARPC3_HUMAN
397	sp|P08637|FCG3A_HUMAN	HUMAN	Low affinity immunoglobulin gamma Fc region receptor III-A OS=Homo sapiens GN=FCGR3A PE=2 SV=2	2.9	2.9	1	1	1	7	9.055	sp|P08637|FCG3A_HUMAN
398	sp|Q6IBS0|TWF2_HUMAN	HUMAN	Twinfilin-2 OS=Homo sapiens GN=TWF2 PE=1 SV=2	2.88	2.88	1	1	1	1	11.17	sp|Q6IBS0|TWF2_HUMAN
399	sp|P26447|S10A4_HUMAN	HUMAN	Protein S100-A4 OS=Homo sapiens GN=S100A4 PE=1 SV=1	2.87	3	1	2	2	4	18.81	sp|P26447|S10A4_HUMAN
400	sp|Q93084|AT2A3_HUMAN	HUMAN	Sarcoplasmic/endoplasmic reticulum calcium ATPase 3 OS=Homo sapiens GN=ATP2A3 PE=1 SV=2	2.86	2.96	1	1	1	1	2.685	sp|Q93084|AT2A3_HUMAN
401	sp|P16435|NCPR_HUMAN	HUMAN	NADPH--cytochrome P450 reductase OS=Homo sapiens GN=POR PE=1 SV=2	2.86	2.86	1	1	1	1	4.284	sp|P16435|NCPR_HUMAN
402	sp|O75947|ATP5H_HUMAN	HUMAN	ATP synthase subunit d, mitochondrial OS=Homo sapiens GN=ATP5H PE=1 SV=3	2.84	2.84	1	1	1	1	23.6	sp|O75947|ATP5H_HUMAN
403	sp|Q9UL46|PSME2_HUMAN	HUMAN	Proteasome activator complex subunit 2 OS=Homo sapiens GN=PSME2 PE=1 SV=3	2.8	2.84	1	2	1	7	12.13	sp|Q9UL46|PSME2_HUMAN
404	sp|Q9Y224|CN166_HUMAN	HUMAN	UPF0568 protein C14orf166 OS=Homo sapiens GN=C14orf166 PE=1 SV=1	2.8	2.8	1	2	1	2	13.93	sp|Q9Y224|CN166_HUMAN
405	sp|Q7LDG7|GRP2_HUMAN	HUMAN	RAS guanyl-releasing protein 2 OS=Homo sapiens GN=RASGRP2 PE=1 SV=1	2.76	2.76	1	1	1	4	6.404	sp|Q7LDG7|GRP2_HUMAN
406	sp|P61088|UBE2N_HUMAN	HUMAN	Ubiquitin-conjugating enzyme E2 N OS=Homo sapiens GN=UBE2N PE=1 SV=1	2.74	2.74	1	1	1	5	14.47	sp|P61088|UBE2N_HUMAN
407	sp|P31943|HNRH1_HUMAN	HUMAN	Heterogeneous nuclear ribonucleoprotein H OS=Homo sapiens GN=HNRNPH1 PE=1 SV=4	2.73	2.74	2	1	1	1	5.122	sp|P31943|HNRH1_HUMAN	sp|P52597|HNRPF_HUMAN
408	sp|P10809|CH60_HUMAN	HUMAN	60 kDa heat shock protein, mitochondrial OS=Homo sapiens GN=HSPD1 PE=1 SV=2	2.62	2.64	1	1	1	5	2.967	sp|P10809|CH60_HUMAN
409	sp|O95498|VNN2_HUMAN	HUMAN	Vascular non-inflammatory molecule 2 OS=Homo sapiens GN=VNN2 PE=1 SV=3	2.6	2.6	1	1	1	4	2.5	sp|O95498|VNN2_HUMAN
410	sp|Q92598|HS105_HUMAN	HUMAN	Heat shock protein 105 kDa OS=Homo sapiens GN=HSPH1 PE=1 SV=1	2.59	2.87	1	1	1	3	1.515	sp|Q92598|HS105_HUMAN
411	sp|Q8TDB8|GTR14_HUMAN	HUMAN	Solute carrier family 2, facilitated glucose transporter member 14 OS=Homo sapiens GN=SLC2A14 PE=2 SV=1	2.56	2.58	2	1	1	1	5.577	sp|Q8TDB8|GTR14_HUMAN	sp|P11169|GTR3_HUMAN
412	sp|Q96KP4|CNDP2_HUMAN	HUMAN	Cytosolic non-specific dipeptidase OS=Homo sapiens GN=CNDP2 PE=1 SV=2	2.51	2.51	1	1	1	1	6.316	sp|Q96KP4|CNDP2_HUMAN
413	sp|P50225|ST1A1_HUMAN	HUMAN	Sulfotransferase 1A1 OS=Homo sapiens GN=SULT1A1 PE=1 SV=2	2.49	2.49	3	2	1	12	7.119	sp|P50225|ST1A1_HUMAN	sp|P50226|ST1A2_HUMAN	sp|P50224|ST1A3_HUMAN
414	sp|Q9Y2J8|PADI2_HUMAN	HUMAN	Protein-arginine deiminase type-2 OS=Homo sapiens GN=PADI2 PE=1 SV=2	2.48	2.5	1	2	1	10	2.556	sp|Q9Y2J8|PADI2_HUMAN
415	sp|P19878|NCF2_HUMAN	HUMAN	Neutrophil cytosol factor 2 OS=Homo sapiens GN=NCF2 PE=1 SV=2	2.43	2.43	1	2	2	8	5.703	sp|P19878|NCF2_HUMAN
416	sp|P02042|HBD_HUMAN	HUMAN	Hemoglobin subunit delta OS=Homo sapiens GN=HBD PE=1 SV=2	2.41	14.08	1	1	1	1	42.18	sp|P02042|HBD_HUMAN
417	sp|Q96P48|CEND2_HUMAN	HUMAN	Centaurin-delta-2 OS=Homo sapiens GN=CENTD2 PE=1 SV=2	2.41	2.43	1	1	1	2	1.074	sp|Q96P48|CEND2_HUMAN
418	sp|P25815|S100P_HUMAN	HUMAN	Protein S100-P OS=Homo sapiens GN=S100P PE=1 SV=2	2.41	2.43	1	1	1	5	10.53	sp|P25815|S100P_HUMAN
419	sp|Q16836|HCDH_HUMAN	HUMAN	Hydroxyacyl-coenzyme A dehydrogenase, mitochondrial OS=Homo sapiens GN=HADH PE=1 SV=2	2.4	2.42	1	1	1	8	3.503	sp|Q16836|HCDH_HUMAN
420	sp|P28482|MK01_HUMAN	HUMAN	Mitogen-activated protein kinase 1 OS=Homo sapiens GN=MAPK1 PE=1 SV=3	2.4	2.4	2	1	1	5	4.167	sp|P28482|MK01_HUMAN	sp|P27361|MK03_HUMAN
421	sp|P08962|CD63_HUMAN	HUMAN	CD63 antigen OS=Homo sapiens GN=CD63 PE=1 SV=2	2.38	2.4	1	1	1	1	2.521	sp|P08962|CD63_HUMAN
422	sp|Q9HBI1|PARVB_HUMAN	HUMAN	Beta-parvin OS=Homo sapiens GN=PARVB PE=1 SV=1	2.36	2.36	1	2	1	11	3.846	sp|Q9HBI1|PARVB_HUMAN
423	sp|P28799|GRN_HUMAN	HUMAN	Granulins OS=Homo sapiens GN=GRN PE=1 SV=2	2.32	2.32	1	1	1	2	2.53	sp|P28799|GRN_HUMAN
424	sp|Q99798|ACON_HUMAN	HUMAN	Aconitate hydratase, mitochondrial OS=Homo sapiens GN=ACO2 PE=1 SV=2	2.31	2.34	1	2	1	2	2.051	sp|Q99798|ACON_HUMAN
425	sp|Q86UT6|NLRX1_HUMAN	HUMAN	NLR family member X1 OS=Homo sapiens GN=NLRX1 PE=2 SV=1	2.31	2.33	1	1	1	1	1.026	sp|Q86UT6|NLRX1_HUMAN
426	sp|Q15067|ACOX1_HUMAN	HUMAN	Peroxisomal acyl-coenzyme A oxidase 1 OS=Homo sapiens GN=ACOX1 PE=1 SV=3	2.31	2.33	1	2	2	5	5.606	sp|Q15067|ACOX1_HUMAN
427	sp|P41439|FOLR3_HUMAN	HUMAN	Folate receptor gamma OS=Homo sapiens GN=FOLR3 PE=1 SV=1	2.31	2.31	1	1	1	1	4.527	sp|P41439|FOLR3_HUMAN
428	sp|P62826|RAN_HUMAN	HUMAN	GTP-binding nuclear protein Ran OS=Homo sapiens GN=RAN PE=1 SV=3	2.29	2.29	1	1	1	13	6.481	sp|P62826|RAN_HUMAN
429	sp|O94973|AP2A2_HUMAN	HUMAN	AP-2 complex subunit alpha-2 OS=Homo sapiens GN=AP2A2 PE=1 SV=2	2.28	4.38	1	1	1	3	4.047	sp|O94973|AP2A2_HUMAN
430	sp|P05455|LA_HUMAN	HUMAN	Lupus La protein OS=Homo sapiens GN=SSB PE=1 SV=2	2.28	2.33	1	1	1	1	3.431	sp|P05455|LA_HUMAN
431	sp|Q8N6Q3|CD177_HUMAN	HUMAN	CD177 antigen OS=Homo sapiens GN=CD177 PE=1 SV=2	2.27	2.27	1	2	1	14	6.178	sp|Q8N6Q3|CD177_HUMAN
432	sp|Q16181|SEPT7_HUMAN	HUMAN	Septin-7 OS=Homo sapiens GN=SEPT7 PE=1 SV=2	2.26	2.26	1	1	1	2	6.636	sp|Q16181|SEPT7_HUMAN
433	sp|Q8NFP9|NBEA_HUMAN	HUMAN	Neurobeachin OS=Homo sapiens GN=NBEA PE=1 SV=1	2.25	2.34	2	1	1	1	0.4073	sp|Q8NFP9|NBEA_HUMAN	sp|P50851|LRBA_HUMAN
434	sp|P07203|GPX1_HUMAN	HUMAN	Glutathione peroxidase 1 OS=Homo sapiens GN=GPX1 PE=1 SV=3	2.24	2.24	1	1	1	5	10.45	sp|P07203|GPX1_HUMAN
435	sp|Q01432|AMPD3_HUMAN	HUMAN	AMP deaminase 3 OS=Homo sapiens GN=AMPD3 PE=1 SV=1	2.22	2.24	1	2	1	12	1.434	sp|Q01432|AMPD3_HUMAN
436	sp|P42785|PCP_HUMAN	HUMAN	Lysosomal Pro-X carboxypeptidase OS=Homo sapiens GN=PRCP PE=1 SV=1	2.21	2.29	1	1	1	6	3.831	sp|P42785|PCP_HUMAN
437	sp|Q8IZ83|A16A1_HUMAN	HUMAN	Aldehyde dehydrogenase family 16 member A1 OS=Homo sapiens GN=ALDH16A1 PE=1 SV=1	2.2	2.25	1	2	2	2	2.993	sp|Q8IZ83|A16A1_HUMAN
438	sp|P48637|GSHB_HUMAN	HUMAN	Glutathione synthetase OS=Homo sapiens GN=GSS PE=1 SV=1	2.2	2.2	1	1	1	2	5.907	sp|P48637|GSHB_HUMAN
439	sp|P13224|GP1BB_HUMAN	HUMAN	Platelet glycoprotein Ib beta chain OS=Homo sapiens GN=GP1BB PE=1 SV=1	2.19	2.23	1	1	1	31	5.34	sp|P13224|GP1BB_HUMAN
440	sp|Q93100|KPBB_HUMAN	HUMAN	Phosphorylase b kinase regulatory subunit beta OS=Homo sapiens GN=PHKB PE=1 SV=3	2.18	3.36	1	1	1	3	1.555	sp|Q93100|KPBB_HUMAN
441	sp|P25788|PSA3_HUMAN	HUMAN	Proteasome subunit alpha type-3 OS=Homo sapiens GN=PSMA3 PE=1 SV=2	2.18	2.2	1	1	1	3	4.706	sp|P25788|PSA3_HUMAN
442	sp|P07332|FES_HUMAN	HUMAN	Proto-oncogene tyrosine-protein kinase Fes/Fps OS=Homo sapiens GN=FES PE=1 SV=3	2.18	2.18	1	1	1	1	3.041	sp|P07332|FES_HUMAN
443	sp|Q9NVJ2|ARL8B_HUMAN	HUMAN	ADP-ribosylation factor-like protein 8B OS=Homo sapiens GN=ARL8B PE=1 SV=1	2.17	2.26	2	1	1	5	8.065	sp|Q9NVJ2|ARL8B_HUMAN	sp|Q96BM9|ARL8A_HUMAN
444	sp|P40616|ARL1_HUMAN	HUMAN	ADP-ribosylation factor-like protein 1 OS=Homo sapiens GN=ARL1 PE=1 SV=1	2.17	2.19	1	1	1	5	8.84	sp|P40616|ARL1_HUMAN
445	sp|Q01469|FABP5_HUMAN	HUMAN	Fatty acid-binding protein, epidermal OS=Homo sapiens GN=FABP5 PE=1 SV=3	2.16	2.16	1	1	1	12	6.667	sp|Q01469|FABP5_HUMAN
446	sp|P09769|FGR_HUMAN	HUMAN	Proto-oncogene tyrosine-protein kinase FGR OS=Homo sapiens GN=FGR PE=1 SV=2	2.15	4.24	1	1	1	3	4.348	sp|P09769|FGR_HUMAN
447	sp|Q9Y6D6|BIG1_HUMAN	HUMAN	Brefeldin A-inhibited guanine nucleotide-exchange protein 1 OS=Homo sapiens GN=ARFGEF1 PE=1 SV=2	2.15	2.35	1	1	1	1	0.9194	sp|Q9Y6D6|BIG1_HUMAN
448	sp|P11277|SPTB1_HUMAN	HUMAN	Spectrin beta chain, erythrocyte OS=Homo sapiens GN=SPTB PE=1 SV=4	2.14	2.24	1	1	1	1	0.7019	sp|P11277|SPTB1_HUMAN
449	sp|P20292|AL5AP_HUMAN	HUMAN	Arachidonate 5-lipoxygenase-activating protein OS=Homo sapiens GN=ALOX5AP PE=1 SV=2	2.14	2.14	1	1	1	4	8.075	sp|P20292|AL5AP_HUMAN
450	sp|O95210|STBD1_HUMAN	HUMAN	Starch-binding domain-containing protein 1 OS=Homo sapiens GN=STBD1 PE=1 SV=1	2.14	2.14	1	1	1	2	5.307	sp|O95210|STBD1_HUMAN
451	sp|Q7L1Q6|BZW1_HUMAN	HUMAN	Basic leucine zipper and W2 domain-containing protein 1 OS=Homo sapiens GN=BZW1 PE=1 SV=1	2.13	2.14	9	1	1	1	1.432	sp|Q7L1Q6|BZW1_HUMAN	sp|Q9Y6E2|BZW2_HUMAN	RRRRRsp|Q9C0I4|THS7B_HUMAN	sp|P00747|PLMN_HUMAN	sp|Q86TM6|SYVN1_HUMAN	sp|Q16609|LPAL2_HUMAN	sp|Q15195|PLGA_HUMAN	sp|Q02325|PLGB_HUMAN	sp|P08519|APOA_HUMAN
452	sp|A6NL28|TPM3L_HUMAN	HUMAN	Putative tropomyosin alpha-3 chain-like protein OS=Homo sapiens PE=5 SV=2	2.12	6.16	1	1	1	8	13.9	sp|A6NL28|TPM3L_HUMAN
453	sp|Q6ZNJ1|NBEL2_HUMAN	HUMAN	Neurobeachin-like protein 2 OS=Homo sapiens GN=NBEAL2 PE=2 SV=2	2.12	2.27	1	1	1	1	0.3631	sp|Q6ZNJ1|NBEL2_HUMAN
454	sp|P35754|GLRX1_HUMAN	HUMAN	Glutaredoxin-1 OS=Homo sapiens GN=GLRX PE=1 SV=2	2.11	2.21	1	1	1	7	10.38	sp|P35754|GLRX1_HUMAN
455	sp|Q9H2G2|SLK_HUMAN	HUMAN	STE20-like serine/threonine-protein kinase OS=Homo sapiens GN=SLK PE=1 SV=1	2.1	2.12	1	1	1	4	1.7	sp|Q9H2G2|SLK_HUMAN
456	sp|P98171|RHG04_HUMAN	HUMAN	Rho GTPase-activating protein 4 OS=Homo sapiens GN=ARHGAP4 PE=1 SV=2	2.09	2.13	1	1	1	2	1.163	sp|P98171|RHG04_HUMAN
457	sp|P02730|B3AT_HUMAN	HUMAN	Band 3 anion transport protein OS=Homo sapiens GN=SLC4A1 PE=1 SV=3	2.09	2.12	1	1	1	3	0.8782	sp|P02730|B3AT_HUMAN
458	sp|P01842|LAC_HUMAN	HUMAN	Ig lambda chain C regions OS=Homo sapiens GN=IGLC1 PE=1 SV=1	2.09	2.09	1	1	1	1	19.05	sp|P01842|LAC_HUMAN
459	sp|Q9HC38|GLOD4_HUMAN	HUMAN	Glyoxalase domain-containing protein 4 OS=Homo sapiens GN=GLOD4 PE=1 SV=1	2.09	2.09	1	2	1	6	3.834	sp|Q9HC38|GLOD4_HUMAN
460	sp|P31689|DNJA1_HUMAN	HUMAN	DnaJ homolog subfamily A member 1 OS=Homo sapiens GN=DNAJA1 PE=1 SV=2	2.08	2.13	1	1	1	1	6.045	sp|P31689|DNJA1_HUMAN
461	sp|Q12906|ILF3_HUMAN	HUMAN	Interleukin enhancer-binding factor 3 OS=Homo sapiens GN=ILF3 PE=1 SV=3	2.08	2.08	2	1	1	1	1.119	sp|Q12906|ILF3_HUMAN	sp|Q96SI9|STRBP_HUMAN
462	sp|O60664|M6PBP_HUMAN	HUMAN	Mannose-6-phosphate receptor-binding protein 1 OS=Homo sapiens GN=M6PRBP1 PE=1 SV=2	2.08	2.08	1	1	1	6	4.378	sp|O60664|M6PBP_HUMAN
463	sp|Q15386|UBE3C_HUMAN	HUMAN	Ubiquitin-protein ligase E3C OS=Homo sapiens GN=UBE3C PE=1 SV=3	2.07	2.42	1	1	1	1	1.754	sp|Q15386|UBE3C_HUMAN
464	sp|Q15020|SART3_HUMAN	HUMAN	Squamous cell carcinoma antigen recognized by T-cells 3 OS=Homo sapiens GN=SART3 PE=1 SV=1	2.07	2.17	1	1	1	1	1.454	sp|Q15020|SART3_HUMAN
465	sp|P35573|GDE_HUMAN	HUMAN	Glycogen debranching enzyme OS=Homo sapiens GN=AGL PE=1 SV=3	2.07	2.1	1	1	1	1	1.893	sp|P35573|GDE_HUMAN
466	sp|P49721|PSB2_HUMAN	HUMAN	Proteasome subunit beta type-2 OS=Homo sapiens GN=PSMB2 PE=1 SV=1	2.07	2.07	1	1	1	6	5.473	sp|P49721|PSB2_HUMAN
467	sp|P02774|VTDB_HUMAN	HUMAN	Vitamin D-binding protein OS=Homo sapiens GN=GC PE=1 SV=1	2.07	2.07	1	1	1	4	4.641	sp|P02774|VTDB_HUMAN
468	sp|P01834|IGKC_HUMAN	HUMAN	Ig kappa chain C region OS=Homo sapiens GN=IGKC PE=1 SV=1	2.07	2.07	1	1	1	2	13.21	sp|P01834|IGKC_HUMAN
469	sp|P56537|IF6_HUMAN	HUMAN	Eukaryotic translation initiation factor 6 OS=Homo sapiens GN=EIF6 PE=1 SV=1	2.07	2.07	1	1	1	4	9.796	sp|P56537|IF6_HUMAN
470	sp|P14550|AK1A1_HUMAN	HUMAN	Alcohol dehydrogenase [NADP+] OS=Homo sapiens GN=AKR1A1 PE=1 SV=3	2.06	4.08	1	1	1	1	6.769	sp|P14550|AK1A1_HUMAN
471	sp|Q15149|PLEC1_HUMAN	HUMAN	Plectin-1 OS=Homo sapiens GN=PLEC1 PE=1 SV=2	2.06	2.23	1	1	1	1	0.4483	sp|Q15149|PLEC1_HUMAN
472	sp|P26885|FKBP2_HUMAN	HUMAN	FK506-binding protein 2 OS=Homo sapiens GN=FKBP2 PE=1 SV=2	2.06	2.23	1	1	1	2	19.72	sp|P26885|FKBP2_HUMAN
473	sp|O43149|ZZEF1_HUMAN	HUMAN	Zinc finger ZZ-type and EF-hand domain-containing protein 1 OS=Homo sapiens GN=ZZEF1 PE=1 SV=5	2.06	2.12	1	1	1	1	0.3377	sp|O43149|ZZEF1_HUMAN
474	sp|P22061|PIMT_HUMAN	HUMAN	Protein-L-isoaspartate(D-aspartate) O-methyltransferase OS=Homo sapiens GN=PCMT1 PE=1 SV=3	2.06	2.09	1	1	1	9	7.489	sp|P22061|PIMT_HUMAN
475	sp|Q96JJ7|TXD10_HUMAN	HUMAN	Protein disulfide-isomerase TXNDC10 OS=Homo sapiens GN=TXNDC10 PE=1 SV=2	2.06	2.07	1	1	1	1	6.167	sp|Q96JJ7|TXD10_HUMAN
476	sp|P48426|PI42A_HUMAN	HUMAN	Phosphatidylinositol-5-phosphate 4-kinase type-2 alpha OS=Homo sapiens GN=PIP4K2A PE=1 SV=2	2.06	2.06	2	1	1	1	2.217	sp|P48426|PI42A_HUMAN	sp|P78356|PI42B_HUMAN
477	sp|Q92614|MY18A_HUMAN	HUMAN	Myosin-XVIIIa OS=Homo sapiens GN=MYO18A PE=1 SV=3	2.05	3.75	1	1	1	3	1.461	sp|Q92614|MY18A_HUMAN
478	sp|Q14571|ITPR2_HUMAN	HUMAN	Inositol 1,4,5-trisphosphate receptor type 2 OS=Homo sapiens GN=ITPR2 PE=2 SV=1	2.05	2.17	1	1	1	1	0.4813	sp|Q14571|ITPR2_HUMAN
479	sp|O43242|PSMD3_HUMAN	HUMAN	26S proteasome non-ATPase regulatory subunit 3 OS=Homo sapiens GN=PSMD3 PE=1 SV=2	2.05	2.05	1	1	1	2	2.434	sp|O43242|PSMD3_HUMAN
480	sp|P43243|MATR3_HUMAN	HUMAN	Matrin-3 OS=Homo sapiens GN=MATR3 PE=1 SV=2	2.05	2.05	1	1	1	3	1.653	sp|P43243|MATR3_HUMAN
481	sp|Q2TAA2|IAH1_HUMAN	HUMAN	Isoamyl acetate-hydrolyzing esterase 1 homolog OS=Homo sapiens GN=IAH1 PE=2 SV=1	2.05	2.05	1	1	1	4	6.048	sp|Q2TAA2|IAH1_HUMAN
482	sp|P09972|ALDOC_HUMAN	HUMAN	Fructose-bisphosphate aldolase C OS=Homo sapiens GN=ALDOC PE=1 SV=2	2.04	13.24	1	3	3	11	23.08	sp|P09972|ALDOC_HUMAN
483	sp|Q9H0U4|RAB1B_HUMAN	HUMAN	Ras-related protein Rab-1B OS=Homo sapiens GN=RAB1B PE=1 SV=1	2.04	4.73	2	2	1	8	13.93	sp|Q9H0U4|RAB1B_HUMAN	sp|Q92928|RAB1C_HUMAN
484	sp|Q92930|RAB8B_HUMAN	HUMAN	Ras-related protein Rab-8B OS=Homo sapiens GN=RAB8B PE=1 SV=2	2.04	4.67	1	1	1	4	12.08	sp|Q92930|RAB8B_HUMAN
485	sp|Q8NF91|SYNE1_HUMAN	HUMAN	Nesprin-1 OS=Homo sapiens GN=SYNE1 PE=1 SV=2	2.04	2.28	1	1	1	1	0.1023	sp|Q8NF91|SYNE1_HUMAN
486	sp|Q07666|KHDR1_HUMAN	HUMAN	KH domain-containing, RNA-binding, signal transduction-associated protein 1 OS=Homo sapiens GN=KHDRBS1 PE=1 SV=1	2.04	2.04	1	1	1	1	4.515	sp|Q07666|KHDR1_HUMAN
487	sp|P99999|CYC_HUMAN	HUMAN	Cytochrome c OS=Homo sapiens GN=CYCS PE=1 SV=2	2.04	2.04	1	1	1	6	16.19	sp|P99999|CYC_HUMAN
488	sp|O14980|XPO1_HUMAN	HUMAN	Exportin-1 OS=Homo sapiens GN=XPO1 PE=1 SV=1	2.03	2.34	1	1	1	3	1.027	sp|O14980|XPO1_HUMAN
489	sp|Q00839|HNRPU_HUMAN	HUMAN	Heterogeneous nuclear ribonucleoprotein U OS=Homo sapiens GN=HNRNPU PE=1 SV=5	2.03	2.22	1	1	1	3	2.67	sp|Q00839|HNRPU_HUMAN
490	sp|A6NC98|CC88B_HUMAN	HUMAN	Coiled-coil domain-containing protein 88B OS=Homo sapiens GN=CCDC88B PE=2 SV=1	2.03	2.08	1	1	1	5	0.813	sp|A6NC98|CC88B_HUMAN
491	sp|P22681|CBL_HUMAN	HUMAN	E3 ubiquitin-protein ligase CBL OS=Homo sapiens GN=CBL PE=1 SV=1	2.03	2.06	1	1	1	1	1.104	sp|P22681|CBL_HUMAN
492	sp|Q13464|ROCK1_HUMAN	HUMAN	Rho-associated protein kinase 1 OS=Homo sapiens GN=ROCK1 PE=1 SV=1	2.03	2.04	2	2	1	2	1.256	sp|Q13464|ROCK1_HUMAN	sp|O75116|ROCK2_HUMAN
493	sp|Q9UIJ7|KAD3_HUMAN	HUMAN	GTP:AMP phosphotransferase mitochondrial OS=Homo sapiens GN=AK3 PE=1 SV=4	2.03	2.04	1	1	1	1	6.167	sp|Q9UIJ7|KAD3_HUMAN
494	sp|Q6NUK1|SCMC1_HUMAN	HUMAN	Calcium-binding mitochondrial carrier protein SCaMC-1 OS=Homo sapiens GN=SLC25A24 PE=1 SV=2	2.03	2.04	1	1	1	3	3.354	sp|Q6NUK1|SCMC1_HUMAN
495	sp|Q08211|DHX9_HUMAN	HUMAN	ATP-dependent RNA helicase A OS=Homo sapiens GN=DHX9 PE=1 SV=4	2.03	2.03	1	1	1	10	0.9449	sp|Q08211|DHX9_HUMAN
496	sp|P16152|CBR1_HUMAN	HUMAN	Carbonyl reductase [NADPH] 1 OS=Homo sapiens GN=CBR1 PE=1 SV=3	2.03	2.03	1	1	1	1	5.415	sp|P16152|CBR1_HUMAN
497	sp|P22102|PUR2_HUMAN	HUMAN	Trifunctional purine biosynthetic protein adenosine-3 OS=Homo sapiens GN=GART PE=1 SV=1	2.03	2.03	1	1	1	1	1.386	sp|P22102|PUR2_HUMAN
498	sp|P16109|LYAM3_HUMAN	HUMAN	P-selectin OS=Homo sapiens GN=SELP PE=1 SV=2	2.03	2.03	1	1	1	2	2.169	sp|P16109|LYAM3_HUMAN
499	sp|P11310|ACADM_HUMAN	HUMAN	Medium-chain specific acyl-CoA dehydrogenase, mitochondrial OS=Homo sapiens GN=ACADM PE=1 SV=1	2.03	2.03	1	1	1	7	7.363	sp|P11310|ACADM_HUMAN
500	sp|Q32P51|ROA1L_HUMAN	HUMAN	Heterogeneous nuclear ribonucleoprotein A1-like protein OS=Homo sapiens GN=HNRNPA1L PE=2 SV=2	2.03	2.03	3	1	1	3	5	sp|Q32P51|ROA1L_HUMAN	sp|P0C7M2|RA1L3_HUMAN	sp|P09651|ROA1_HUMAN
501	sp|P41226|UBA7_HUMAN	HUMAN	Ubiquitin-like modifier-activating enzyme 7 OS=Homo sapiens GN=UBA7 PE=1 SV=1	2.03	2.03	1	1	1	1	1.78	sp|P41226|UBA7_HUMAN
502	sp|P04080|CYTB_HUMAN	HUMAN	Cystatin-B OS=Homo sapiens GN=CSTB PE=1 SV=2	2.03	2.03	1	1	1	3	12.24	sp|P04080|CYTB_HUMAN
503	sp|O14656|TOR1A_HUMAN	HUMAN	Torsin-1A OS=Homo sapiens GN=TOR1A PE=1 SV=1	2.03	2.03	1	2	1	3	4.518	sp|O14656|TOR1A_HUMAN
504	sp|Q9P1F3|CF115_HUMAN	HUMAN	Uncharacterized protein C6orf115 OS=Homo sapiens GN=C6orf115 PE=1 SV=1	2.03	2.03	1	1	1	6	16.05	sp|Q9P1F3|CF115_HUMAN
505	sp|Q3ZCW2|LEGL_HUMAN	HUMAN	Galectin-related protein OS=Homo sapiens GN=GRP PE=1 SV=2	2.03	2.03	1	1	1	8	11.05	sp|Q3ZCW2|LEGL_HUMAN
506	sp|Q15691|MARE1_HUMAN	HUMAN	Microtubule-associated protein RP/EB family member 1 OS=Homo sapiens GN=MAPRE1 PE=1 SV=3	2.02	2.76	1	1	1	4	6.716	sp|Q15691|MARE1_HUMAN
507	sp|Q9Y262|IF3EI_HUMAN	HUMAN	Eukaryotic translation initiation factor 3 subunit E-interacting protein OS=Homo sapiens GN=EIF3EIP PE=1 SV=1	2.02	2.17	1	1	1	5	2.305	sp|Q9Y262|IF3EI_HUMAN
508	sp|Q13724|GCS1_HUMAN	HUMAN	Mannosyl-oligosaccharide glucosidase OS=Homo sapiens GN=GCS1 PE=1 SV=5	2.02	2.08	1	1	1	1	2.151	sp|Q13724|GCS1_HUMAN
509	sp|Q92608|DOCK2_HUMAN	HUMAN	Dedicator of cytokinesis protein 2 OS=Homo sapiens GN=DOCK2 PE=1 SV=2	2.02	2.07	1	1	1	1	0.8743	sp|Q92608|DOCK2_HUMAN
510	sp|O95166|GBRAP_HUMAN	HUMAN	Gamma-aminobutyric acid receptor-associated protein OS=Homo sapiens GN=GABARAP PE=1 SV=1	2.02	2.05	2	1	1	3	14.53	sp|O95166|GBRAP_HUMAN	sp|Q9H0R8|GBRL1_HUMAN
511	sp|Q8NHP6|MSPD2_HUMAN	HUMAN	Motile sperm domain-containing protein 2 OS=Homo sapiens GN=MOSPD2 PE=1 SV=1	2.02	2.04	1	1	1	1	2.896	sp|Q8NHP6|MSPD2_HUMAN
512	sp|P12268|IMDH2_HUMAN	HUMAN	Inosine-5'-monophosphate dehydrogenase 2 OS=Homo sapiens GN=IMPDH2 PE=1 SV=2	2.02	2.04	1	1	1	2	3.696	sp|P12268|IMDH2_HUMAN
513	sp|Q13492|PICAL_HUMAN	HUMAN	Phosphatidylinositol-binding clathrin assembly protein OS=Homo sapiens GN=PICALM PE=1 SV=2	2.02	2.03	1	1	1	3	4.141	sp|Q13492|PICAL_HUMAN
514	sp|O00232|PSD12_HUMAN	HUMAN	26S proteasome non-ATPase regulatory subunit 12 OS=Homo sapiens GN=PSMD12 PE=1 SV=3	2.02	2.03	1	1	1	6	2.851	sp|O00232|PSD12_HUMAN
515	sp|P13598|ICAM2_HUMAN	HUMAN	Intercellular adhesion molecule 2 OS=Homo sapiens GN=ICAM2 PE=1 SV=2	2.02	2.03	1	1	1	1	5.818	sp|P13598|ICAM2_HUMAN
516	sp|P36776|LONM_HUMAN	HUMAN	Lon protease homolog, mitochondrial OS=Homo sapiens GN=LONP1 PE=2 SV=2	2.02	2.02	1	1	1	1	1.356	sp|P36776|LONM_HUMAN
517	sp|Q02218|ODO1_HUMAN	HUMAN	2-oxoglutarate dehydrogenase E1 component, mitochondrial OS=Homo sapiens GN=OGDH PE=1 SV=3	2.02	2.02	1	1	1	2	1.173	sp|Q02218|ODO1_HUMAN
518	sp|P11766|ADHX_HUMAN	HUMAN	Alcohol dehydrogenase class-3 OS=Homo sapiens GN=ADH5 PE=1 SV=4	2.02	2.02	1	1	1	2	4.545	sp|P11766|ADHX_HUMAN
519	sp|Q9Y678|COPG_HUMAN	HUMAN	Coatomer subunit gamma OS=Homo sapiens GN=COPG PE=1 SV=1	2.02	2.02	1	1	1	3	1.716	sp|Q9Y678|COPG_HUMAN
520	sp|Q13303|KCAB2_HUMAN	HUMAN	Voltage-gated potassium channel subunit beta-2 OS=Homo sapiens GN=KCNAB2 PE=1 SV=2	2.02	2.02	1	1	1	5	5.177	sp|Q13303|KCAB2_HUMAN
521	sp|Q01105|SET_HUMAN	HUMAN	Protein SET OS=Homo sapiens GN=SET PE=1 SV=3	2.02	2.02	1	1	1	4	4.828	sp|Q01105|SET_HUMAN
522	sp|P46734|MP2K3_HUMAN	HUMAN	Dual specificity mitogen-activated protein kinase kinase 3 OS=Homo sapiens GN=MAP2K3 PE=1 SV=2	2.02	2.02	1	1	1	3	5.187	sp|P46734|MP2K3_HUMAN
523	sp|O43294|TGFI1_HUMAN	HUMAN	Transforming growth factor beta-1-induced transcript 1 protein OS=Homo sapiens GN=TGFB1I1 PE=1 SV=2	2.02	2.02	1	1	1	3	3.471	sp|O43294|TGFI1_HUMAN
524	sp|Q9UHQ9|NB5R1_HUMAN	HUMAN	NADH-cytochrome b5 reductase 1 OS=Homo sapiens GN=CYB5R1 PE=1 SV=1	2.02	2.02	2	1	1	1	5.902	sp|Q9UHQ9|NB5R1_HUMAN	sp|Q6BCY4|NB5R2_HUMAN
525	sp|Q9H1E5|TXD13_HUMAN	HUMAN	Thioredoxin domain-containing protein 13 OS=Homo sapiens GN=TXNDC13 PE=1 SV=1	2.02	2.02	1	1	1	1	4.298	sp|Q9H1E5|TXD13_HUMAN
526	sp|O94979|SC31A_HUMAN	HUMAN	Protein transport protein Sec31A OS=Homo sapiens GN=SEC31A PE=1 SV=3	2.01	2.66	1	1	1	5	1.639	sp|O94979|SC31A_HUMAN
527	sp|O00194|RB27B_HUMAN	HUMAN	Ras-related protein Rab-27B OS=Homo sapiens GN=RAB27B PE=1 SV=4	2.01	2.55	1	1	1	31	5.046	sp|O00194|RB27B_HUMAN
528	sp|Q93009|UBP7_HUMAN	HUMAN	Ubiquitin carboxyl-terminal hydrolase 7 OS=Homo sapiens GN=USP7 PE=1 SV=1	2.01	2.13	1	1	1	1	1.18	sp|Q93009|UBP7_HUMAN
529	sp|Q9UIA9|XPO7_HUMAN	HUMAN	Exportin-7 OS=Homo sapiens GN=XPO7 PE=1 SV=3	2.01	2.09	1	2	1	2	1.472	sp|Q9UIA9|XPO7_HUMAN
530	sp|Q9UBS4|DJB11_HUMAN	HUMAN	DnaJ homolog subfamily B member 11 OS=Homo sapiens GN=DNAJB11 PE=1 SV=1	2.01	2.07	1	1	1	3	3.073	sp|Q9UBS4|DJB11_HUMAN
531	sp|Q86VS8|HOOK3_HUMAN	HUMAN	Protein Hook homolog 3 OS=Homo sapiens GN=HOOK3 PE=1 SV=2	2.01	2.05	1	1	1	1	3.343	sp|Q86VS8|HOOK3_HUMAN
532	sp|P36957|ODO2_HUMAN	HUMAN	Dihydrolipoyllysine-residue succinyltransferase component of 2-oxoglutarate dehydrogenase complex, mitochondrial OS=Homo sapiens GN=DLST PE=1 SV=3	2.01	2.05	6	1	1	4	1.325	sp|P36957|ODO2_HUMAN	RRRRRsp|P02730|B3AT_HUMAN	sp|P16473|TSHR_HUMAN	sp|P0C7U3|ZH11B_HUMAN	RRRRRsp|Q8IY26|PPAC2_HUMAN	RRRRRsp|Q8NGK3|O52K2_HUMAN
533	sp|Q92673|SORL_HUMAN	HUMAN	Sortilin-related receptor OS=Homo sapiens GN=SORL1 PE=1 SV=1	2.01	2.04	1	1	1	6	0.9033	sp|Q92673|SORL_HUMAN
534	sp|Q9UJU6|DBNL_HUMAN	HUMAN	Drebrin-like protein OS=Homo sapiens GN=DBNL PE=1 SV=1	2.01	2.03	1	2	1	5	4.651	sp|Q9UJU6|DBNL_HUMAN
535	sp|P13861|KAP2_HUMAN	HUMAN	cAMP-dependent protein kinase type II-alpha regulatory subunit OS=Homo sapiens GN=PRKAR2A PE=1 SV=2	2.01	2.03	1	1	1	2	2.475	sp|P13861|KAP2_HUMAN
536	sp|Q32MZ4|LRRF1_HUMAN	HUMAN	Leucine-rich repeat flightless-interacting protein 1 OS=Homo sapiens GN=LRRFIP1 PE=1 SV=2	2.01	2.02	1	1	1	7	1.733	sp|Q32MZ4|LRRF1_HUMAN
537	sp|P42126|D3D2_HUMAN	HUMAN	3,2-trans-enoyl-CoA isomerase, mitochondrial OS=Homo sapiens GN=DCI PE=1 SV=1	2.01	2.02	1	1	1	3	4.305	sp|P42126|D3D2_HUMAN
538	sp|P31948|STIP1_HUMAN	HUMAN	Stress-induced-phosphoprotein 1 OS=Homo sapiens GN=STIP1 PE=1 SV=1	2.01	2.01	1	1	1	6	1.657	sp|P31948|STIP1_HUMAN
539	sp|P55209|NP1L1_HUMAN	HUMAN	Nucleosome assembly protein 1-like 1 OS=Homo sapiens GN=NAP1L1 PE=1 SV=1	2.01	2.01	1	1	1	4	2.813	sp|P55209|NP1L1_HUMAN
540	sp|P00492|HPRT_HUMAN	HUMAN	Hypoxanthine-guanine phosphoribosyltransferase OS=Homo sapiens GN=HPRT1 PE=1 SV=2	2.01	2.01	1	1	1	13	4.587	sp|P00492|HPRT_HUMAN
541	sp|P83916|CBX1_HUMAN	HUMAN	Chromobox protein homolog 1 OS=Homo sapiens GN=CBX1 PE=1 SV=1	2.01	2.01	1	1	1	6	15.68	sp|P83916|CBX1_HUMAN
542	sp|P00813|ADA_HUMAN	HUMAN	Adenosine deaminase OS=Homo sapiens GN=ADA PE=1 SV=3	2.01	2.01	1	1	1	1	8.54	sp|P00813|ADA_HUMAN
543	sp|Q9Y2S2|CRYL1_HUMAN	HUMAN	Lambda-crystallin homolog OS=Homo sapiens GN=CRYL1 PE=2 SV=3	2.01	2.01	1	1	1	2	7.21	sp|Q9Y2S2|CRYL1_HUMAN
544	sp|Q12912|LRMP_HUMAN	HUMAN	Lymphoid-restricted membrane protein OS=Homo sapiens GN=LRMP PE=1 SV=1	2.01	2.01	1	1	1	1	3.243	sp|Q12912|LRMP_HUMAN
545	sp|Q01629|IFM2_HUMAN	HUMAN	Interferon-induced transmembrane protein 2 OS=Homo sapiens GN=IFITM2 PE=1 SV=1	2.01	2.01	3	1	1	6	12.12	sp|Q01629|IFM2_HUMAN	sp|Q01628|IFM3_HUMAN	sp|P13164|IFM1_HUMAN
546	sp|P80217|IN35_HUMAN	HUMAN	Interferon-induced 35 kDa protein OS=Homo sapiens GN=IFI35 PE=1 SV=4	2.01	2.01	1	1	1	2	5.594	sp|P80217|IN35_HUMAN
547	sp|P53634|CATC_HUMAN	HUMAN	Dipeptidyl-peptidase 1 OS=Homo sapiens GN=CTSC PE=1 SV=1	2.01	2.01	2	1	1	5	1.296	sp|P53634|CATC_HUMAN	RRRRRsp|Q8NCN5|PDPR_HUMAN
548	sp|O75663|TIPRL_HUMAN	HUMAN	TIP41-like protein OS=Homo sapiens GN=TIPRL PE=1 SV=2	2.01	2.01	1	1	1	3	7.721	sp|O75663|TIPRL_HUMAN
549	sp|O15260|SURF4_HUMAN	HUMAN	Surfeit locus protein 4 OS=Homo sapiens GN=SURF4 PE=2 SV=3	2.01	2.01	1	1	1	2	5.948	sp|O15260|SURF4_HUMAN
550	sp|P24844|MYL9_HUMAN	HUMAN	Myosin regulatory light polypeptide 9 OS=Homo sapiens GN=MYL9 PE=1 SV=4	2	10.82	1	1	1	1	50.58	sp|P24844|MYL9_HUMAN
551	sp|P15531|NDKA_HUMAN	HUMAN	Nucleoside diphosphate kinase A OS=Homo sapiens GN=NME1 PE=1 SV=1	2	8.3	1	1	1	1	46.05	sp|P15531|NDKA_HUMAN
552	sp|P09104|ENOG_HUMAN	HUMAN	Gamma-enolase OS=Homo sapiens GN=ENO2 PE=1 SV=3	2	7.28	1	1	1	1	14.29	sp|P09104|ENOG_HUMAN
553	sp|P35241|RADI_HUMAN	HUMAN	Radixin OS=Homo sapiens GN=RDX PE=1 SV=1	2	7.22	1	1	1	4	9.091	sp|P35241|RADI_HUMAN
554	sp|P15311|EZRI_HUMAN	HUMAN	Ezrin OS=Homo sapiens GN=EZR PE=1 SV=4	2	7.2	1	1	1	12	9.044	sp|P15311|EZRI_HUMAN
555	sp|P63010|AP2B1_HUMAN	HUMAN	AP-2 complex subunit beta-1 OS=Homo sapiens GN=AP2B1 PE=1 SV=1	2	6.6	1	1	1	1	4.696	sp|P63010|AP2B1_HUMAN
556	sp|P62873|GBB1_HUMAN	HUMAN	Guanine nucleotide-binding protein G(I)/G(S)/G(T) subunit beta-1 OS=Homo sapiens GN=GNB1 PE=1 SV=3	2	4.4	1	1	1	7	12.06	sp|P62873|GBB1_HUMAN
557	sp|P61020|RAB5B_HUMAN	HUMAN	Ras-related protein Rab-5B OS=Homo sapiens GN=RAB5B PE=1 SV=1	2	4.09	1	1	1	1	11.63	sp|P61020|RAB5B_HUMAN
558	sp|Q96FN4|CPNE2_HUMAN	HUMAN	Copine-2 OS=Homo sapiens GN=CPNE2 PE=2 SV=3	2	4.04	1	1	1	1	4.38	sp|Q96FN4|CPNE2_HUMAN
559	sp|P12931|SRC_HUMAN	HUMAN	Proto-oncogene tyrosine-protein kinase Src OS=Homo sapiens GN=SRC PE=1 SV=3	2	4.01	1	1	1	1	5.224	sp|P12931|SRC_HUMAN
560	sp|O75015|FCG3B_HUMAN	HUMAN	Low affinity immunoglobulin gamma Fc region receptor III-B OS=Homo sapiens GN=FCGR3B PE=1 SV=2	2	2.9	1	1	1	9	11.59	sp|O75015|FCG3B_HUMAN
561	sp|P55795|HNRH2_HUMAN	HUMAN	Heterogeneous nuclear ribonucleoprotein H2 OS=Homo sapiens GN=HNRNPH2 PE=1 SV=1	2	2.73	1	1	1	4	5.122	sp|P55795|HNRH2_HUMAN
562	sp|Q9H993|CF211_HUMAN	HUMAN	UPF0364 protein C6orf211 OS=Homo sapiens GN=C6orf211 PE=1 SV=1	2	2.69	1	1	1	4	6.576	sp|Q9H993|CF211_HUMAN
563	sp|P62942|FKB1A_HUMAN	HUMAN	Peptidyl-prolyl cis-trans isomerase FKBP1A OS=Homo sapiens GN=FKBP1A PE=1 SV=2	2	2.5	1	1	1	7	12.96	sp|P62942|FKB1A_HUMAN
564	sp|P54136|SYRC_HUMAN	HUMAN	Arginyl-tRNA synthetase, cytoplasmic OS=Homo sapiens GN=RARS PE=1 SV=2	2	2.48	1	1	1	1	1.515	sp|P54136|SYRC_HUMAN
565	sp|P35611|ADDA_HUMAN	HUMAN	Alpha-adducin OS=Homo sapiens GN=ADD1 PE=1 SV=2	2	2.38	1	1	1	1	1.764	sp|P35611|ADDA_HUMAN
566	sp|Q14739|LBR_HUMAN	HUMAN	Lamin-B receptor OS=Homo sapiens GN=LBR PE=1 SV=2	2	2.34	1	1	1	2	0.9756	sp|Q14739|LBR_HUMAN
567	sp|Q8NBM8|PCYXL_HUMAN	HUMAN	Prenylcysteine oxidase-like OS=Homo sapiens GN=PCYOX1L PE=1 SV=1	2	2.34	1	1	1	1	2.227	sp|Q8NBM8|PCYXL_HUMAN
568	sp|P49588|SYAC_HUMAN	HUMAN	Alanyl-tRNA synthetase, cytoplasmic OS=Homo sapiens GN=AARS PE=1 SV=2	2	2.32	1	1	1	8	1.963	sp|P49588|SYAC_HUMAN
569	sp|Q8IV04|TB10C_HUMAN	HUMAN	Carabin OS=Homo sapiens GN=TBC1D10C PE=1 SV=1	2	2.31	1	1	1	4	3.139	sp|Q8IV04|TB10C_HUMAN
570	sp|P26599|PTBP1_HUMAN	HUMAN	Polypyrimidine tract-binding protein 1 OS=Homo sapiens GN=PTBP1 PE=1 SV=1	2	2.29	1	1	1	4	3.013	sp|P26599|PTBP1_HUMAN
571	sp|Q15418|KS6A1_HUMAN	HUMAN	Ribosomal protein S6 kinase alpha-1 OS=Homo sapiens GN=RPS6KA1 PE=1 SV=2	2	2.28	1	2	1	7	2.177	sp|Q15418|KS6A1_HUMAN
572	sp|O95571|ETHE1_HUMAN	HUMAN	Protein ETHE1, mitochondrial OS=Homo sapiens GN=ETHE1 PE=1 SV=2	2	2.28	1	1	1	4	3.937	sp|O95571|ETHE1_HUMAN
573	sp|P78371|TCPB_HUMAN	HUMAN	T-complex protein 1 subunit beta OS=Homo sapiens GN=CCT2 PE=1 SV=4	2	2.28	1	1	1	2	3.364	sp|P78371|TCPB_HUMAN
574	sp|P24539|AT5F1_HUMAN	HUMAN	ATP synthase subunit b, mitochondrial OS=Homo sapiens GN=ATP5F1 PE=1 SV=2	2	2.28	1	1	1	10	5.859	sp|P24539|AT5F1_HUMAN
575	sp|P05166|PCCB_HUMAN	HUMAN	Propionyl-CoA carboxylase beta chain, mitochondrial OS=Homo sapiens GN=PCCB PE=1 SV=3	2	2.24	1	1	1	2	3.154	sp|P05166|PCCB_HUMAN
576	sp|A6NMY6|AXA2L_HUMAN	HUMAN	Putative annexin A2-like protein OS=Homo sapiens GN=ANXA2P2 PE=5 SV=2	2	2.22	2	1	1	2	2.95	sp|A6NMY6|AXA2L_HUMAN	sp|P07355|ANXA2_HUMAN
577	sp|P61758|PFD3_HUMAN	HUMAN	Prefoldin subunit 3 OS=Homo sapiens GN=VBP1 PE=1 SV=3	2	2.17	1	1	1	6	6.599	sp|P61758|PFD3_HUMAN
578	sp|P08236|BGLR_HUMAN	HUMAN	Beta-glucuronidase OS=Homo sapiens GN=GUSB PE=1 SV=2	2	2.15	1	1	1	1	1.382	sp|P08236|BGLR_HUMAN
579	sp|P46379|BAT3_HUMAN	HUMAN	Large proline-rich protein BAT3 OS=Homo sapiens GN=BAT3 PE=1 SV=2	2	2.13	1	1	1	1	1.502	sp|P46379|BAT3_HUMAN
580	sp|O00391|QSOX1_HUMAN	HUMAN	Sulfhydryl oxidase 1 OS=Homo sapiens GN=QSOX1 PE=1 SV=3	2	2.11	1	1	1	10	2.142	sp|O00391|QSOX1_HUMAN
581	sp|O95837|GNA14_HUMAN	HUMAN	Guanine nucleotide-binding protein alpha-14 subunit OS=Homo sapiens GN=GNA14 PE=2 SV=1	2	2.09	3	1	1	6	4.225	sp|O95837|GNA14_HUMAN	sp|P29992|GNA11_HUMAN	sp|P50148|GNAQ_HUMAN
582	sp|O00241|SIRB1_HUMAN	HUMAN	Signal regulatory protein beta-1 OS=Homo sapiens GN=SIRPB1 PE=1 SV=3	2	2.09	1	1	1	1	3.266	sp|O00241|SIRB1_HUMAN
583	sp|Q16539|MK14_HUMAN	HUMAN	Mitogen-activated protein kinase 14 OS=Homo sapiens GN=MAPK14 PE=1 SV=3	2	2.09	1	1	1	1	2.222	sp|Q16539|MK14_HUMAN
584	sp|P39687|AN32A_HUMAN	HUMAN	Acidic leucine-rich nuclear phosphoprotein 32 family member A OS=Homo sapiens GN=ANP32A PE=1 SV=1	2	2.09	2	1	1	1	4.418	sp|P39687|AN32A_HUMAN	sp|O43423|AN32C_HUMAN
585	sp|Q99623|PHB2_HUMAN	HUMAN	Prohibitin-2 OS=Homo sapiens GN=PHB2 PE=1 SV=2	2	2.07	1	1	1	3	3.679	sp|Q99623|PHB2_HUMAN
586	sp|Q14344|GNA13_HUMAN	HUMAN	Guanine nucleotide-binding protein alpha-13 subunit OS=Homo sapiens GN=GNA13 PE=1 SV=2	2	2.07	1	1	1	1	3.979	sp|Q14344|GNA13_HUMAN
587	sp|Q9H0E2|TOLIP_HUMAN	HUMAN	Toll-interacting protein OS=Homo sapiens GN=TOLLIP PE=1 SV=1	2	2.07	1	1	1	4	5.109	sp|Q9H0E2|TOLIP_HUMAN
588	sp|Q05655|KPCD_HUMAN	HUMAN	Protein kinase C delta type OS=Homo sapiens GN=PRKCD PE=1 SV=2	2	2.06	1	1	1	1	1.775	sp|Q05655|KPCD_HUMAN
589	sp|Q06187|BTK_HUMAN	HUMAN	Tyrosine-protein kinase BTK OS=Homo sapiens GN=BTK PE=1 SV=3	2	2.06	1	1	1	2	3.642	sp|Q06187|BTK_HUMAN
590	sp|P48960|CD97_HUMAN	HUMAN	CD97 antigen OS=Homo sapiens GN=CD97 PE=1 SV=4	2	2.06	1	1	1	9	2.395	sp|P48960|CD97_HUMAN
591	sp|O95352|ATG7_HUMAN	HUMAN	Autophagy-related protein 7 OS=Homo sapiens GN=ATG7 PE=1 SV=1	2	2.06	1	2	1	11	2.134	sp|O95352|ATG7_HUMAN
592	sp|O60884|DNJA2_HUMAN	HUMAN	DnaJ homolog subfamily A member 2 OS=Homo sapiens GN=DNAJA2 PE=1 SV=1	2	2.06	1	2	1	2	6.068	sp|O60884|DNJA2_HUMAN
593	sp|P25098|ARBK1_HUMAN	HUMAN	Beta-adrenergic receptor kinase 1 OS=Homo sapiens GN=ADRBK1 PE=1 SV=2	2	2.06	1	1	1	2	2.758	sp|P25098|ARBK1_HUMAN
594	sp|P01019|ANGT_HUMAN	HUMAN	Angiotensinogen OS=Homo sapiens GN=AGT PE=1 SV=1	2	2.06	1	1	1	1	3.505	sp|P01019|ANGT_HUMAN
595	sp|P08571|CD14_HUMAN	HUMAN	Monocyte differentiation antigen CD14 OS=Homo sapiens GN=CD14 PE=1 SV=2	2	2.06	1	1	1	1	4	sp|P08571|CD14_HUMAN
596	sp|P30085|KCY_HUMAN	HUMAN	UMP-CMP kinase OS=Homo sapiens GN=CMPK1 PE=1 SV=3	2	2.05	1	1	1	2	8.673	sp|P30085|KCY_HUMAN
597	sp|A1L0T0|ILVBL_HUMAN	HUMAN	Acetolactate synthase-like protein OS=Homo sapiens GN=ILVBL PE=1 SV=2	2	2.05	1	1	1	1	3.006	sp|A1L0T0|ILVBL_HUMAN
598	sp|Q9P126|CLC1B_HUMAN	HUMAN	C-type lectin domain family 1 member B OS=Homo sapiens GN=CLEC1B PE=1 SV=2	2	2.05	1	1	1	2	8.297	sp|Q9P126|CLC1B_HUMAN
599	sp|Q9BRR9|RHG09_HUMAN	HUMAN	Rho GTPase-activating protein 9 OS=Homo sapiens GN=ARHGAP9 PE=1 SV=2	2	2.05	1	1	1	5	2.133	sp|Q9BRR9|RHG09_HUMAN
600	sp|P13284|GILT_HUMAN	HUMAN	Gamma-interferon-inducible lysosomal thiol reductase OS=Homo sapiens GN=IFI30 PE=1 SV=2	2	2.05	1	2	1	5	9.962	sp|P13284|GILT_HUMAN
601	sp|Q8TDZ2|MICA1_HUMAN	HUMAN	NEDD9-interacting protein with calponin homology and LIM domains OS=Homo sapiens GN=MICAL1 PE=1 SV=2	2	2.04	1	1	1	1	1.218	sp|Q8TDZ2|MICA1_HUMAN
602	sp|Q66K74|MAP1S_HUMAN	HUMAN	Microtubule-associated protein 1S OS=Homo sapiens GN=MAP1S PE=1 SV=2	2	2.04	1	1	1	1	1.7	sp|Q66K74|MAP1S_HUMAN
603	sp|Q9NY33|DPP3_HUMAN	HUMAN	Dipeptidyl-peptidase 3 OS=Homo sapiens GN=DPP3 PE=1 SV=2	2	2.04	1	1	1	2	2.849	sp|Q9NY33|DPP3_HUMAN
604	sp|Q8WWI5|CTL1_HUMAN	HUMAN	Choline transporter-like protein 1 OS=Homo sapiens GN=SLC44A1 PE=2 SV=1	2	2.04	1	1	1	1	2.283	sp|Q8WWI5|CTL1_HUMAN
605	sp|Q9UHA4|MK1I1_HUMAN	HUMAN	Mitogen-activated protein kinase kinase 1-interacting protein 1 OS=Homo sapiens GN=MAP2K1IP1 PE=1 SV=1	2	2.04	1	1	1	3	8.065	sp|Q9UHA4|MK1I1_HUMAN
606	sp|P04217|A1BG_HUMAN	HUMAN	Alpha-1B-glycoprotein OS=Homo sapiens GN=A1BG PE=1 SV=3	2	2.04	1	1	1	5	4.04	sp|P04217|A1BG_HUMAN
607	sp|Q15435|PP1R7_HUMAN	HUMAN	Protein phosphatase 1 regulatory subunit 7 OS=Homo sapiens GN=PPP1R7 PE=1 SV=1	2	2.03	1	1	1	7	5	sp|Q15435|PP1R7_HUMAN
608	sp|P17980|PRS6A_HUMAN	HUMAN	26S protease regulatory subunit 6A OS=Homo sapiens GN=PSMC3 PE=1 SV=3	2	2.03	1	1	1	2	3.645	sp|P17980|PRS6A_HUMAN
609	sp|Q7Z4H8|KDEL2_HUMAN	HUMAN	KDEL motif-containing protein 2 OS=Homo sapiens GN=KDELC2 PE=2 SV=2	2	2.03	1	1	1	1	1.775	sp|Q7Z4H8|KDEL2_HUMAN
610	sp|Q8WZA0|LZIC_HUMAN	HUMAN	Protein LZIC OS=Homo sapiens GN=LZIC PE=1 SV=1	2	2.03	1	1	1	1	11.58	sp|Q8WZA0|LZIC_HUMAN
611	sp|P78380|OLR1_HUMAN	HUMAN	Oxidized low-density lipoprotein receptor 1 OS=Homo sapiens GN=OLR1 PE=1 SV=1	2	2.03	1	1	1	2	7.692	sp|P78380|OLR1_HUMAN
612	sp|P46439|GSTM5_HUMAN	HUMAN	Glutathione S-transferase Mu 5 OS=Homo sapiens GN=GSTM5 PE=2 SV=3	2	2.03	3	1	1	3	7.798	sp|P46439|GSTM5_HUMAN	sp|Q03013|GSTM4_HUMAN	sp|P09488|GSTM1_HUMAN
613	sp|P20073|ANXA7_HUMAN	HUMAN	Annexin A7 OS=Homo sapiens GN=ANXA7 PE=1 SV=2	2	2.03	1	1	1	6	1.639	sp|P20073|ANXA7_HUMAN
614	sp|Q04941|PLP2_HUMAN	HUMAN	Proteolipid protein 2 OS=Homo sapiens GN=PLP2 PE=1 SV=1	2	2.03	1	1	1	5	9.868	sp|Q04941|PLP2_HUMAN
615	sp|P61225|RAP2B_HUMAN	HUMAN	Ras-related protein Rap-2b OS=Homo sapiens GN=RAP2B PE=1 SV=1	2	2.03	1	1	1	3	6.557	sp|P61225|RAP2B_HUMAN
616	sp|P78344|IF4G2_HUMAN	HUMAN	Eukaryotic translation initiation factor 4 gamma 2 OS=Homo sapiens GN=EIF4G2 PE=1 SV=1	2	2.02	1	1	1	5	1.103	sp|P78344|IF4G2_HUMAN
617	sp|Q86VP6|CAND1_HUMAN	HUMAN	Cullin-associated NEDD8-dissociated protein 1 OS=Homo sapiens GN=CAND1 PE=1 SV=2	2	2.02	1	1	1	5	1.138	sp|Q86VP6|CAND1_HUMAN
618	sp|Q9UL25|RAB21_HUMAN	HUMAN	Ras-related protein Rab-21 OS=Homo sapiens GN=RAB21 PE=1 SV=3	2	2.02	1	1	1	8	4.889	sp|Q9UL25|RAB21_HUMAN
619	sp|Q9NYL9|TMOD3_HUMAN	HUMAN	Tropomodulin-3 OS=Homo sapiens GN=TMOD3 PE=1 SV=1	2	2.02	1	1	1	3	3.977	sp|Q9NYL9|TMOD3_HUMAN
620	sp|Q9NUV9|GIMA4_HUMAN	HUMAN	GTPase IMAP family member 4 OS=Homo sapiens GN=GIMAP4 PE=1 SV=1	2	2.02	1	1	1	7	4.863	sp|Q9NUV9|GIMA4_HUMAN
621	sp|P15374|UCHL3_HUMAN	HUMAN	Ubiquitin carboxyl-terminal hydrolase isozyme L3 OS=Homo sapiens GN=UCHL3 PE=1 SV=1	2	2.02	1	1	1	2	6.957	sp|P15374|UCHL3_HUMAN
622	sp|P05023|AT1A1_HUMAN	HUMAN	Sodium/potassium-transporting ATPase subunit alpha-1 OS=Homo sapiens GN=ATP1A1 PE=1 SV=1	2	2.02	1	1	1	4	2.444	sp|P05023|AT1A1_HUMAN
623	sp|O75695|XRP2_HUMAN	HUMAN	Protein XRP2 OS=Homo sapiens GN=RP2 PE=1 SV=4	2	2.02	1	1	1	1	2.857	sp|O75695|XRP2_HUMAN
624	sp|Q9Y336|SIGL9_HUMAN	HUMAN	Sialic acid-binding Ig-like lectin 9 OS=Homo sapiens GN=SIGLEC9 PE=1 SV=2	2	2.02	1	1	1	1	4.968	sp|Q9Y336|SIGL9_HUMAN
625	sp|P27695|APEX1_HUMAN	HUMAN	DNA-(apurinic or apyrimidinic site) lyase OS=Homo sapiens GN=APEX1 PE=1 SV=2	2	2.02	1	1	1	6	5.346	sp|P27695|APEX1_HUMAN
626	sp|O00584|RNT2_HUMAN	HUMAN	Ribonuclease T2 OS=Homo sapiens GN=RNASET2 PE=1 SV=2	2	2.02	1	1	1	9	6.641	sp|O00584|RNT2_HUMAN
627	sp|Q9Y4H4|GPSM3_HUMAN	HUMAN	G-protein-signaling modulator 3 OS=Homo sapiens GN=GPSM3 PE=1 SV=1	2	2.02	1	1	1	16	11.25	sp|Q9Y4H4|GPSM3_HUMAN
628	sp|Q15555|MARE2_HUMAN	HUMAN	Microtubule-associated protein RP/EB family member 2 OS=Homo sapiens GN=MAPRE2 PE=1 SV=1	2	2.02	1	1	1	4	3.67	sp|Q15555|MARE2_HUMAN
629	sp|P53801|PTTG_HUMAN	HUMAN	Pituitary tumor-transforming gene 1 protein-interacting protein OS=Homo sapiens GN=PTTG1IP PE=1 SV=1	2	2.02	1	1	1	5	10	sp|P53801|PTTG_HUMAN
630	sp|Q13057|COASY_HUMAN	HUMAN	Bifunctional coenzyme A synthase OS=Homo sapiens GN=COASY PE=1 SV=4	2	2.01	1	1	1	1	2.128	sp|Q13057|COASY_HUMAN
631	sp|Q07020|RL18_HUMAN	HUMAN	60S ribosomal protein L18 OS=Homo sapiens GN=RPL18 PE=1 SV=2	2	2.01	1	1	1	2	6.915	sp|Q07020|RL18_HUMAN
632	sp|P35998|PRS7_HUMAN	HUMAN	26S protease regulatory subunit 7 OS=Homo sapiens GN=PSMC2 PE=1 SV=3	2	2.01	1	2	1	5	3.464	sp|P35998|PRS7_HUMAN
633	sp|P34897|GLYM_HUMAN	HUMAN	Serine hydroxymethyltransferase, mitochondrial OS=Homo sapiens GN=SHMT2 PE=1 SV=3	2	2.01	1	1	1	1	4.167	sp|P34897|GLYM_HUMAN
634	sp|Q8N6C8|LIRA3_HUMAN	HUMAN	Leukocyte immunoglobulin-like receptor subfamily A member 3 OS=Homo sapiens GN=LILRA3 PE=1 SV=3	2	2.01	1	1	1	6	4.784	sp|Q8N6C8|LIRA3_HUMAN
635	sp|Q7L5D6|CG020_HUMAN	HUMAN	UPF0363 protein C7orf20 OS=Homo sapiens GN=C7orf20 PE=1 SV=1	2	2.01	1	1	1	1	4.587	sp|Q7L5D6|CG020_HUMAN
636	sp|P30084|ECHM_HUMAN	HUMAN	Enoyl-CoA hydratase, mitochondrial OS=Homo sapiens GN=ECHS1 PE=1 SV=4	2	2.01	1	1	1	5	5.862	sp|P30084|ECHM_HUMAN
637	sp|O75367|H2AY_HUMAN	HUMAN	Core histone macro-H2A.1 OS=Homo sapiens GN=H2AFY PE=1 SV=4	2	2.01	1	1	1	4	2.688	sp|O75367|H2AY_HUMAN
638	sp|O60603|TLR2_HUMAN	HUMAN	Toll-like receptor 2 OS=Homo sapiens GN=TLR2 PE=1 SV=1	2	2.01	1	2	1	4	1.531	sp|O60603|TLR2_HUMAN
639	sp|O14975|S27A2_HUMAN	HUMAN	Very long-chain acyl-CoA synthetase OS=Homo sapiens GN=SLC27A2 PE=1 SV=1	2	2.01	1	1	1	3	3.226	sp|O14975|S27A2_HUMAN
640	sp|Q9BX68|HINT2_HUMAN	HUMAN	Histidine triad nucleotide-binding protein 2 OS=Homo sapiens GN=HINT2 PE=1 SV=1	2	2.01	1	1	1	6	12.27	sp|Q9BX68|HINT2_HUMAN
641	sp|Q16621|NFE2_HUMAN	HUMAN	Transcription factor NF-E2 45 kDa subunit OS=Homo sapiens GN=NFE2 PE=2 SV=1	2	2.01	1	1	1	1	3.485	sp|Q16621|NFE2_HUMAN
642	sp|P58546|MTPN_HUMAN	HUMAN	Myotrophin OS=Homo sapiens GN=MTPN PE=1 SV=2	2	2.01	1	1	1	1	14.41	sp|P58546|MTPN_HUMAN
643	sp|P33241|LSP1_HUMAN	HUMAN	Lymphocyte-specific protein 1 OS=Homo sapiens GN=LSP1 PE=1 SV=1	2	2.01	1	1	1	2	7.965	sp|P33241|LSP1_HUMAN
644	sp|P17655|CAN2_HUMAN	HUMAN	Calpain-2 catalytic subunit OS=Homo sapiens GN=CAPN2 PE=1 SV=5	2	2.01	1	1	1	2	2.143	sp|P17655|CAN2_HUMAN
645	sp|O00170|AIP_HUMAN	HUMAN	AH receptor-interacting protein OS=Homo sapiens GN=AIP PE=1 SV=1	2	2.01	1	1	1	1	3.636	sp|O00170|AIP_HUMAN
646	sp|Q9UL15|BAG5_HUMAN	HUMAN	BAG family molecular chaperone regulator 5 OS=Homo sapiens GN=BAG5 PE=1 SV=1	2	2.01	1	1	1	1	3.356	sp|Q9UL15|BAG5_HUMAN
647	sp|Q9BRP8|WIBG_HUMAN	HUMAN	Protein wibg homolog OS=Homo sapiens GN=WIBG PE=1 SV=1	2	2.01	1	1	1	3	6.373	sp|Q9BRP8|WIBG_HUMAN
648	sp|Q8N668|COMD1_HUMAN	HUMAN	COMM domain-containing protein 1 OS=Homo sapiens GN=COMMD1 PE=1 SV=1	2	2.01	1	1	1	4	11.05	sp|Q8N668|COMD1_HUMAN
649	sp|Q05209|PTN12_HUMAN	HUMAN	Tyrosine-protein phosphatase non-receptor type 12 OS=Homo sapiens GN=PTPN12 PE=1 SV=2	2	2.01	1	1	1	6	1.923	sp|Q05209|PTN12_HUMAN
650	sp|Q13200|PSMD2_HUMAN	HUMAN	26S proteasome non-ATPase regulatory subunit 2 OS=Homo sapiens GN=PSMD2 PE=1 SV=3	2	2	1	1	1	1	2.423	sp|Q13200|PSMD2_HUMAN
651	sp|P30040|ERP29_HUMAN	HUMAN	Endoplasmic reticulum protein ERp29 OS=Homo sapiens GN=ERP29 PE=1 SV=4	2	2	1	1	1	4	3.831	sp|P30040|ERP29_HUMAN
652	sp|P83111|LACTB_HUMAN	HUMAN	Serine beta-lactamase-like protein LACTB, mitochondrial OS=Homo sapiens GN=LACTB PE=1 SV=2	2	2	1	1	1	3	2.742	sp|P83111|LACTB_HUMAN
653	sp|P63151|2ABA_HUMAN	HUMAN	Serine/threonine-protein phosphatase 2A 55 kDa regulatory subunit B alpha isoform OS=Homo sapiens GN=PPP2R2A PE=1 SV=1	2	2	3	1	1	6	3.132	sp|P63151|2ABA_HUMAN	sp|Q66LE6|2ABD_HUMAN	sp|Q00005|2ABB_HUMAN
654	sp|P31040|DHSA_HUMAN	HUMAN	Succinate dehydrogenase [ubiquinone] flavoprotein subunit, mitochondrial OS=Homo sapiens GN=SDHA PE=1 SV=2	2	2	1	1	1	4	2.108	sp|P31040|DHSA_HUMAN
655	sp|P21399|ACOC_HUMAN	HUMAN	Cytoplasmic aconitate hydratase OS=Homo sapiens GN=ACO1 PE=1 SV=3	2	2	1	1	1	5	2.137	sp|P21399|ACOC_HUMAN
656	sp|P20810|ICAL_HUMAN	HUMAN	Calpastatin OS=Homo sapiens GN=CAST PE=1 SV=4	2	2	1	1	1	6	2.119	sp|P20810|ICAL_HUMAN
657	sp|Q86V81|THOC4_HUMAN	HUMAN	THO complex subunit 4 OS=Homo sapiens GN=THOC4 PE=1 SV=3	2	2	1	1	1	1	10.12	sp|Q86V81|THOC4_HUMAN
658	sp|Q6NVY1|HIBCH_HUMAN	HUMAN	3-hydroxyisobutyryl-CoA hydrolase, mitochondrial OS=Homo sapiens GN=HIBCH PE=1 SV=2	2	2	1	1	1	1	3.109	sp|Q6NVY1|HIBCH_HUMAN
659	sp|Q1KMD3|HNRL2_HUMAN	HUMAN	Heterogeneous nuclear ribonucleoprotein U-like protein 2 OS=Homo sapiens GN=HNRNPUL2 PE=1 SV=1	2	2	1	1	1	1	1.74	sp|Q1KMD3|HNRL2_HUMAN
660	sp|Q15008|PSMD6_HUMAN	HUMAN	26S proteasome non-ATPase regulatory subunit 6 OS=Homo sapiens GN=PSMD6 PE=1 SV=1	2	2	1	1	1	5	3.856	sp|Q15008|PSMD6_HUMAN
661	sp|P63208|SKP1_HUMAN	HUMAN	S-phase kinase-associated protein 1 OS=Homo sapiens GN=SKP1 PE=1 SV=2	2	2	1	1	1	2	17.18	sp|P63208|SKP1_HUMAN
662	sp|P29692|EF1D_HUMAN	HUMAN	Elongation factor 1-delta OS=Homo sapiens GN=EEF1D PE=1 SV=5	2	2	1	1	1	5	4.27	sp|P29692|EF1D_HUMAN
663	sp|O94804|STK10_HUMAN	HUMAN	Serine/threonine-protein kinase 10 OS=Homo sapiens GN=STK10 PE=1 SV=1	2	2	1	1	1	5	2.169	sp|O94804|STK10_HUMAN
664	sp|O75915|PRAF3_HUMAN	HUMAN	PRA1 family protein 3 OS=Homo sapiens GN=ARL6IP5 PE=1 SV=1	2	2	1	1	1	5	5.851	sp|O75915|PRAF3_HUMAN
665	sp|O60496|DOK2_HUMAN	HUMAN	Docking protein 2 OS=Homo sapiens GN=DOK2 PE=1 SV=2	2	2	1	1	1	2	5.825	sp|O60496|DOK2_HUMAN
666	sp|O43813|LANC1_HUMAN	HUMAN	LanC-like protein 1 OS=Homo sapiens GN=LANCL1 PE=1 SV=1	2	2	1	1	1	11	5.514	sp|O43813|LANC1_HUMAN
667	sp|Q9Y251|HPSE_HUMAN	HUMAN	Heparanase OS=Homo sapiens GN=HPSE PE=1 SV=1	2	2	1	1	1	2	3.315	sp|Q9Y251|HPSE_HUMAN
668	sp|Q9ULZ9|MMP17_HUMAN	HUMAN	Matrix metalloproteinase-17 OS=Homo sapiens GN=MMP17 PE=1 SV=3	2	2	1	0	0	0	1.155	sp|Q9ULZ9|MMP17_HUMAN
669	sp|Q9UFN0|NPS3A_HUMAN	HUMAN	Protein NipSnap homolog 3A OS=Homo sapiens GN=NIPSNAP3A PE=1 SV=2	2	2	1	1	1	3	9.312	sp|Q9UFN0|NPS3A_HUMAN
670	sp|Q9UBQ0|VPS29_HUMAN	HUMAN	Vacuolar protein sorting-associated protein 29 OS=Homo sapiens GN=VPS29 PE=1 SV=1	2	2	1	1	1	2	12.64	sp|Q9UBQ0|VPS29_HUMAN
671	sp|Q9NR12|PDLI7_HUMAN	HUMAN	PDZ and LIM domain protein 7 OS=Homo sapiens GN=PDLIM7 PE=1 SV=1	2	2	1	1	1	2	2.626	sp|Q9NR12|PDLI7_HUMAN
672	sp|Q93079|H2B1H_HUMAN	HUMAN	Histone H2B type 1-H OS=Homo sapiens GN=HIST1H2BH PE=1 SV=3	2	2	14	1	1	7	11.9	sp|Q93079|H2B1H_HUMAN	sp|Q5QNW6|H2B2F_HUMAN	sp|P23527|H2B1O_HUMAN	sp|Q99880|H2B1L_HUMAN	sp|Q99879|H2B1M_HUMAN	sp|Q99877|H2B1N_HUMAN	sp|Q8N257|H2B3B_HUMAN	sp|Q16778|H2B2E_HUMAN	sp|P62807|H2B1C_HUMAN	sp|P58876|H2B1D_HUMAN
673	sp|Q92688|AN32B_HUMAN	HUMAN	Acidic leucine-rich nuclear phosphoprotein 32 family member B OS=Homo sapiens GN=ANP32B PE=1 SV=1	2	2	1	1	1	1	4.382	sp|Q92688|AN32B_HUMAN
674	sp|Q3YEC7|PARF_HUMAN	HUMAN	Putative GTP-binding protein Parf OS=Homo sapiens GN=PARF PE=1 SV=2	2	2	1	1	1	3	1.509	sp|Q3YEC7|PARF_HUMAN
675	sp|Q16881|TRXR1_HUMAN	HUMAN	Thioredoxin reductase 1, cytoplasmic OS=Homo sapiens GN=TXNRD1 PE=1 SV=3	2	2	1	1	1	2	2.311	sp|Q16881|TRXR1_HUMAN
676	sp|Q15437|SC23B_HUMAN	HUMAN	Protein transport protein Sec23B OS=Homo sapiens GN=SEC23B PE=1 SV=2	2	2	2	2	1	4	1.825	sp|Q15437|SC23B_HUMAN	sp|Q15436|SC23A_HUMAN
677	sp|Q14012|KCC1A_HUMAN	HUMAN	Calcium/calmodulin-dependent protein kinase type 1 OS=Homo sapiens GN=CAMK1 PE=1 SV=1	2	2	1	1	1	1	2.703	sp|Q14012|KCC1A_HUMAN
678	sp|Q13867|BLMH_HUMAN	HUMAN	Bleomycin hydrolase OS=Homo sapiens GN=BLMH PE=1 SV=1	2	2	1	1	1	3	2.418	sp|Q13867|BLMH_HUMAN
679	sp|P54578|UBP14_HUMAN	HUMAN	Ubiquitin carboxyl-terminal hydrolase 14 OS=Homo sapiens GN=USP14 PE=1 SV=3	2	2	1	1	1	2	3.644	sp|P54578|UBP14_HUMAN
680	sp|P50991|TCPD_HUMAN	HUMAN	T-complex protein 1 subunit delta OS=Homo sapiens GN=CCT4 PE=1 SV=4	2	2	1	1	1	5	2.412	sp|P50991|TCPD_HUMAN
681	sp|P49585|PCY1A_HUMAN	HUMAN	Choline-phosphate cytidylyltransferase A OS=Homo sapiens GN=PCYT1A PE=1 SV=2	2	2	1	1	1	1	4.632	sp|P49585|PCY1A_HUMAN
682	sp|P34059|GALNS_HUMAN	HUMAN	N-acetylgalactosamine-6-sulfatase OS=Homo sapiens GN=GALNS PE=1 SV=1	2	2	1	1	1	6	2.874	sp|P34059|GALNS_HUMAN
683	sp|P30038|AL4A1_HUMAN	HUMAN	Delta-1-pyrroline-5-carboxylate dehydrogenase, mitochondrial OS=Homo sapiens GN=ALDH4A1 PE=1 SV=3	2	2	1	1	1	3	3.375	sp|P30038|AL4A1_HUMAN
684	sp|P21796|VDAC1_HUMAN	HUMAN	Voltage-dependent anion-selective channel protein 1 OS=Homo sapiens GN=VDAC1 PE=1 SV=2	2	2	1	1	1	1	3.18	sp|P21796|VDAC1_HUMAN
685	sp|P20674|COX5A_HUMAN	HUMAN	Cytochrome c oxidase subunit 5A, mitochondrial OS=Homo sapiens GN=COX5A PE=1 SV=1	2	2	1	1	1	2	20	sp|P20674|COX5A_HUMAN
686	sp|O75340|PDCD6_HUMAN	HUMAN	Programmed cell death protein 6 OS=Homo sapiens GN=PDCD6 PE=1 SV=1	2	2	1	1	1	1	5.236	sp|O75340|PDCD6_HUMAN
687	sp|O60711|LPXN_HUMAN	HUMAN	Leupaxin OS=Homo sapiens GN=LPXN PE=1 SV=1	2	2	1	1	1	1	6.218	sp|O60711|LPXN_HUMAN
688	sp|Q9Y287|ITM2B_HUMAN	HUMAN	Integral membrane protein 2B OS=Homo sapiens GN=ITM2B PE=1 SV=1	2	2	1	1	1	4	3.759	sp|Q9Y287|ITM2B_HUMAN
689	sp|Q96AT9|RPE_HUMAN	HUMAN	Ribulose-phosphate 3-epimerase OS=Homo sapiens GN=RPE PE=1 SV=1	2	2	1	1	1	1	8.333	sp|Q96AT9|RPE_HUMAN
690	sp|Q92820|GGH_HUMAN	HUMAN	Gamma-glutamyl hydrolase OS=Homo sapiens GN=GGH PE=1 SV=2	2	2	1	1	1	1	4.403	sp|Q92820|GGH_HUMAN
691	sp|Q8NBS9|TXND5_HUMAN	HUMAN	Thioredoxin domain-containing protein 5 OS=Homo sapiens GN=TXNDC5 PE=1 SV=2	2	2	1	1	1	1	4.63	sp|Q8NBS9|TXND5_HUMAN
692	sp|Q08623|HDD1A_HUMAN	HUMAN	Haloacid dehalogenase-like hydrolase domain-containing protein 1A OS=Homo sapiens GN=HDHD1A PE=2 SV=2	2	2	1	1	1	4	10.28	sp|Q08623|HDD1A_HUMAN
693	sp|Q04760|LGUL_HUMAN	HUMAN	Lactoylglutathione lyase OS=Homo sapiens GN=GLO1 PE=1 SV=4	2	2	1	1	1	6	10.87	sp|Q04760|LGUL_HUMAN
694	sp|P67812|SC11A_HUMAN	HUMAN	Signal peptidase complex catalytic subunit SEC11A OS=Homo sapiens GN=SEC11A PE=1 SV=1	2	2	1	1	1	4	6.145	sp|P67812|SC11A_HUMAN
695	sp|P63172|DYLT1_HUMAN	HUMAN	Dynein light chain Tctex-type 1 OS=Homo sapiens GN=DYNLT1 PE=1 SV=1	2	2	1	1	1	2	15.93	sp|P63172|DYLT1_HUMAN
696	sp|P61916|NPC2_HUMAN	HUMAN	Epididymal secretory protein E1 OS=Homo sapiens GN=NPC2 PE=1 SV=1	2	2	1	2	1	15	15.23	sp|P61916|NPC2_HUMAN
697	sp|P61457|PHS_HUMAN	HUMAN	Pterin-4-alpha-carbinolamine dehydratase OS=Homo sapiens GN=PCBD1 PE=1 SV=2	2	2	1	1	1	6	15.38	sp|P61457|PHS_HUMAN
698	sp|P56134|ATPK_HUMAN	HUMAN	ATP synthase subunit f, mitochondrial OS=Homo sapiens GN=ATP5J2 PE=2 SV=3	2	2	1	1	1	5	13.83	sp|P56134|ATPK_HUMAN
699	sp|P54619|AAKG1_HUMAN	HUMAN	5'-AMP-activated protein kinase subunit gamma-1 OS=Homo sapiens GN=PRKAG1 PE=1 SV=1	2	2	1	1	1	8	5.74	sp|P54619|AAKG1_HUMAN
700	sp|P40306|PSB10_HUMAN	HUMAN	Proteasome subunit beta type-10 OS=Homo sapiens GN=PSMB10 PE=1 SV=1	2	2	1	1	1	6	7.326	sp|P40306|PSB10_HUMAN
701	sp|P40227|TCPZ_HUMAN	HUMAN	T-complex protein 1 subunit zeta OS=Homo sapiens GN=CCT6A PE=1 SV=3	2	2	1	1	1	4	2.26	sp|P40227|TCPZ_HUMAN
702	sp|P30046|DOPD_HUMAN	HUMAN	D-dopachrome decarboxylase OS=Homo sapiens GN=DDT PE=1 SV=3	2	2	1	1	1	5	6.78	sp|P30046|DOPD_HUMAN
703	sp|P25774|CATS_HUMAN	HUMAN	Cathepsin S OS=Homo sapiens GN=CTSS PE=1 SV=3	2	2	1	1	1	13	5.438	sp|P25774|CATS_HUMAN
704	sp|P16083|NQO2_HUMAN	HUMAN	Ribosyldihydronicotinamide dehydrogenase [quinone] OS=Homo sapiens GN=NQO2 PE=1 SV=4	2	2	1	1	1	4	7.792	sp|P16083|NQO2_HUMAN
705	sp|P14174|MIF_HUMAN	HUMAN	Macrophage migration inhibitory factor OS=Homo sapiens GN=MIF PE=1 SV=4	2	2	1	1	1	41	7.826	sp|P14174|MIF_HUMAN
706	sp|P11177|ODPB_HUMAN	HUMAN	Pyruvate dehydrogenase E1 component subunit beta, mitochondrial OS=Homo sapiens GN=PDHB PE=1 SV=3	2	2	1	1	1	1	4.457	sp|P11177|ODPB_HUMAN
707	sp|P01137|TGFB1_HUMAN	HUMAN	Transforming growth factor beta-1 OS=Homo sapiens GN=TGFB1 PE=1 SV=2	2	2	1	1	1	5	5.128	sp|P01137|TGFB1_HUMAN
708	sp|P00568|KAD1_HUMAN	HUMAN	Adenylate kinase isoenzyme 1 OS=Homo sapiens GN=AK1 PE=1 SV=3	2	2	1	1	1	6	7.216	sp|P00568|KAD1_HUMAN
709	sp|P00403|COX2_HUMAN	HUMAN	Cytochrome c oxidase subunit 2 OS=Homo sapiens GN=MT-CO2 PE=1 SV=1	2	2	1	1	1	2	4.405	sp|P00403|COX2_HUMAN
710	sp|O95866|G6B_HUMAN	HUMAN	Protein G6b OS=Homo sapiens GN=G6B PE=1 SV=1	2	2	1	1	1	1	4.564	sp|O95866|G6B_HUMAN
711	sp|O95685|PPR3D_HUMAN	HUMAN	Protein phosphatase 1 regulatory subunit 3D OS=Homo sapiens GN=PPP1R3D PE=1 SV=1	2	2	1	1	1	1	9.365	sp|O95685|PPR3D_HUMAN
712	sp|O95671|ASML_HUMAN	HUMAN	N-acetylserotonin O-methyltransferase-like protein OS=Homo sapiens GN=ASMTL PE=1 SV=3	2	2	1	1	1	1	2.093	sp|O95671|ASML_HUMAN
713	sp|O95372|LYPA2_HUMAN	HUMAN	Acyl-protein thioesterase 2 OS=Homo sapiens GN=LYPLA2 PE=2 SV=1	2	2	1	1	1	4	10.39	sp|O95372|LYPA2_HUMAN
714	sp|O60613|SEP15_HUMAN	HUMAN	15 kDa selenoprotein OS=Homo sapiens GN=SEP15 PE=1 SV=3	2	2	1	1	1	1	9.877	sp|O60613|SEP15_HUMAN
715	sp|O14773|TPP1_HUMAN	HUMAN	Tripeptidyl-peptidase 1 OS=Homo sapiens GN=TPP1 PE=1 SV=2	2	2	1	1	1	3	4.796	sp|O14773|TPP1_HUMAN
716	sp|A6NDG6|PGP_HUMAN	HUMAN	Phosphoglycolate phosphatase OS=Homo sapiens GN=PGP PE=1 SV=1	2	2	1	1	1	2	5.919	sp|A6NDG6|PGP_HUMAN
717	sp|Q9Y3D6|FIS1_HUMAN	HUMAN	Mitochondrial fission 1 protein OS=Homo sapiens GN=FIS1 PE=1 SV=2	2	2	1	1	1	1	7.237	sp|Q9Y3D6|FIS1_HUMAN
718	sp|Q9Y2B0|CNPY2_HUMAN	HUMAN	Protein canopy homolog 2 OS=Homo sapiens GN=CNPY2 PE=1 SV=1	2	2	1	1	1	6	8.791	sp|Q9Y2B0|CNPY2_HUMAN
719	sp|Q9ULC4|MCTS1_HUMAN	HUMAN	Malignant T cell amplified sequence 1 OS=Homo sapiens GN=MCTS1 PE=1 SV=1	2	2	1	1	1	1	9.392	sp|Q9ULC4|MCTS1_HUMAN
720	sp|Q9UK45|LSM7_HUMAN	HUMAN	U6 snRNA-associated Sm-like protein LSm7 OS=Homo sapiens GN=LSM7 PE=1 SV=1	2	2	1	1	1	2	24.27	sp|Q9UK45|LSM7_HUMAN
721	sp|Q9NP72|RAB18_HUMAN	HUMAN	Ras-related protein Rab-18 OS=Homo sapiens GN=RAB18 PE=1 SV=1	2	2	1	1	1	2	9.223	sp|Q9NP72|RAB18_HUMAN
722	sp|Q9H0W9|CK054_HUMAN	HUMAN	Ester hydrolase C11orf54 OS=Homo sapiens GN=C11orf54 PE=1 SV=1	2	2	1	1	1	2	5.397	sp|Q9H0W9|CK054_HUMAN
723	sp|Q96C86|DCPS_HUMAN	HUMAN	Scavenger mRNA-decapping enzyme DcpS OS=Homo sapiens GN=DCPS PE=1 SV=2	2	2	1	1	1	2	5.638	sp|Q96C86|DCPS_HUMAN
724	sp|Q8WWA1|TMM40_HUMAN	HUMAN	Transmembrane protein 40 OS=Homo sapiens GN=TMEM40 PE=1 SV=2	2	2	1	1	1	2	6.009	sp|Q8WWA1|TMM40_HUMAN
725	sp|Q86V88|MGDP1_HUMAN	HUMAN	Magnesium-dependent phosphatase 1 OS=Homo sapiens GN=MDP1 PE=2 SV=1	2	2	1	2	1	4	10.23	sp|Q86V88|MGDP1_HUMAN
726	sp|Q5VYJ4|RUEL1_HUMAN	HUMAN	Putative small nuclear ribonucleoprotein polypeptide E-like protein 1 OS=Homo sapiens GN=SNRPEL1 PE=5 SV=1	2	2	2	1	1	3	11.96	sp|Q5VYJ4|RUEL1_HUMAN	sp|P62304|RUXE_HUMAN
727	sp|Q13185|CBX3_HUMAN	HUMAN	Chromobox protein homolog 3 OS=Homo sapiens GN=CBX3 PE=1 SV=4	2	2	1	2	1	12	15.85	sp|Q13185|CBX3_HUMAN
728	sp|Q12905|ILF2_HUMAN	HUMAN	Interleukin enhancer-binding factor 2 OS=Homo sapiens GN=ILF2 PE=1 SV=2	2	2	1	1	1	2	3.59	sp|Q12905|ILF2_HUMAN
729	sp|P68036|UB2L3_HUMAN	HUMAN	Ubiquitin-conjugating enzyme E2 L3 OS=Homo sapiens GN=UBE2L3 PE=1 SV=1	2	2	1	1	1	1	14.29	sp|P68036|UB2L3_HUMAN
730	sp|P62318|SMD3_HUMAN	HUMAN	Small nuclear ribonucleoprotein Sm D3 OS=Homo sapiens GN=SNRPD3 PE=1 SV=1	2	2	1	1	1	1	7.143	sp|P62318|SMD3_HUMAN
731	sp|P62314|SMD1_HUMAN	HUMAN	Small nuclear ribonucleoprotein Sm D1 OS=Homo sapiens GN=SNRPD1 PE=1 SV=1	2	2	1	1	1	6	16.81	sp|P62314|SMD1_HUMAN
732	sp|P62244|RS15A_HUMAN	HUMAN	40S ribosomal protein S15a OS=Homo sapiens GN=RPS15A PE=1 SV=2	2	2	1	1	1	7	4.615	sp|P62244|RS15A_HUMAN
733	sp|P59768|GBG2_HUMAN	HUMAN	Guanine nucleotide-binding protein G(I)/G(S)/G(O) subunit gamma-2 OS=Homo sapiens GN=GNG2 PE=1 SV=2	2	2	1	1	1	1	22.54	sp|P59768|GBG2_HUMAN
734	sp|P55957|BID_HUMAN	HUMAN	BH3-interacting domain death agonist OS=Homo sapiens GN=BID PE=1 SV=1	2	2	1	1	1	11	7.692	sp|P55957|BID_HUMAN
735	sp|P51452|DUS3_HUMAN	HUMAN	Dual specificity protein phosphatase 3 OS=Homo sapiens GN=DUSP3 PE=1 SV=1	2	2	1	1	1	4	9.73	sp|P51452|DUS3_HUMAN
736	sp|P28072|PSB6_HUMAN	HUMAN	Proteasome subunit beta type-6 OS=Homo sapiens GN=PSMB6 PE=1 SV=4	2	2	1	1	1	1	9.205	sp|P28072|PSB6_HUMAN
737	sp|P17900|SAP3_HUMAN	HUMAN	Ganglioside GM2 activator OS=Homo sapiens GN=GM2A PE=1 SV=4	2	2	1	1	1	6	10.36	sp|P17900|SAP3_HUMAN
738	sp|P14406|CX7A2_HUMAN	HUMAN	Cytochrome c oxidase polypeptide 7A2, mitochondrial OS=Homo sapiens GN=COX7A2 PE=1 SV=1	2	2	1	1	1	2	15.66	sp|P14406|CX7A2_HUMAN
739	sp|P13804|ETFA_HUMAN	HUMAN	Electron transfer flavoprotein subunit alpha, mitochondrial OS=Homo sapiens GN=ETFA PE=1 SV=1	2	2	1	1	1	2	4.805	sp|P13804|ETFA_HUMAN
740	sp|P13693|TCTP_HUMAN	HUMAN	Translationally-controlled tumor protein OS=Homo sapiens GN=TPT1 PE=1 SV=1	2	2	1	1	1	1	7.558	sp|P13693|TCTP_HUMAN
741	sp|P05121|PAI1_HUMAN	HUMAN	Plasminogen activator inhibitor 1 OS=Homo sapiens GN=SERPINE1 PE=1 SV=1	2	2	1	1	1	2	4.975	sp|P05121|PAI1_HUMAN
742	sp|P04004|VTNC_HUMAN	HUMAN	Vitronectin OS=Homo sapiens GN=VTN PE=1 SV=1	2	2	1	1	1	2	3.138	sp|P04004|VTNC_HUMAN
743	sp|P02652|APOA2_HUMAN	HUMAN	Apolipoprotein A-II OS=Homo sapiens GN=APOA2 PE=1 SV=1	2	2	1	1	1	3	20	sp|P02652|APOA2_HUMAN
744	sp|O75558|STX11_HUMAN	HUMAN	Syntaxin-11 OS=Homo sapiens GN=STX11 PE=1 SV=1	2	2	1	1	1	5	3.136	sp|O75558|STX11_HUMAN
745	sp|O75531|BAF_HUMAN	HUMAN	Barrier-to-autointegration factor OS=Homo sapiens GN=BANF1 PE=1 SV=1	2	2	1	1	1	3	7.865	sp|O75531|BAF_HUMAN
746	sp|O60888|CUTA_HUMAN	HUMAN	Protein CutA OS=Homo sapiens GN=CUTA PE=1 SV=2	2	2	1	2	1	10	10.06	sp|O60888|CUTA_HUMAN
747	sp|O43772|MCAT_HUMAN	HUMAN	Mitochondrial carnitine/acylcarnitine carrier protein OS=Homo sapiens GN=SLC25A20 PE=1 SV=1	2	2	1	1	1	2	2.99	sp|O43772|MCAT_HUMAN
748	sp|O43681|ARSA1_HUMAN	HUMAN	Arsenical pump-driving ATPase OS=Homo sapiens GN=ASNA1 PE=2 SV=2	2	2	1	1	1	1	7.759	sp|O43681|ARSA1_HUMAN
749	sp|O14653|GOSR2_HUMAN	HUMAN	Golgi SNAP receptor complex member 2 OS=Homo sapiens GN=GOSR2 PE=1 SV=2	2	2	1	1	1	2	7.547	sp|O14653|GOSR2_HUMAN
750	sp|P46108|CRK_HUMAN	HUMAN	Proto-oncogene C-crk OS=Homo sapiens GN=CRK PE=1 SV=2	1.92	2	1	1	1	1	5.592	sp|P46108|CRK_HUMAN
751	sp|Q96FW1|OTUB1_HUMAN	HUMAN	Ubiquitin thioesterase OTUB1 OS=Homo sapiens GN=OTUB1 PE=1 SV=2	1.89	2	1	1	1	1	5.535	sp|Q96FW1|OTUB1_HUMAN
752	sp|O75223|CG024_HUMAN	HUMAN	Uncharacterized protein C7orf24 OS=Homo sapiens GN=C7orf24 PE=1 SV=1	1.85	2.47	1	1	1	1	5.319	sp|O75223|CG024_HUMAN
753	sp|Q96M27|PRRC1_HUMAN	HUMAN	Protein PPRC1 OS=Homo sapiens GN=PRRC1 PE=2 SV=1	1.83	1.84	1	1	1	1	2.921	sp|Q96M27|PRRC1_HUMAN
754	sp|P61981|1433G_HUMAN	HUMAN	14-3-3 protein gamma OS=Homo sapiens GN=YWHAG PE=1 SV=2	1.82	6.88	1	1	1	1	18.62	sp|P61981|1433G_HUMAN
755	sp|P17301|ITA2_HUMAN	HUMAN	Integrin alpha-2 OS=Homo sapiens GN=ITGA2 PE=1 SV=1	1.82	1.82	1	1	1	1	1.439	sp|P17301|ITA2_HUMAN
756	sp|P46782|RS5_HUMAN	HUMAN	40S ribosomal protein S5 OS=Homo sapiens GN=RPS5 PE=1 SV=4	1.82	1.82	1	1	1	1	7.353	sp|P46782|RS5_HUMAN
757	sp|Q92835|SHIP1_HUMAN	HUMAN	Phosphatidylinositol-3,4,5-trisphosphate 5-phosphatase 1 OS=Homo sapiens GN=INPP5D PE=1 SV=2	1.8	2.52	1	1	1	1	0.9251	sp|Q92835|SHIP1_HUMAN
758	sp|P00480|OTC_HUMAN	HUMAN	Ornithine carbamoyltransferase, mitochondrial OS=Homo sapiens GN=OTC PE=1 SV=3	1.8	1.8	1	1	1	5	2.26	sp|P00480|OTC_HUMAN
759	sp|Q6PI73|LIRA6_HUMAN	HUMAN	Leukocyte immunoglobulin-like receptor subfamily A member 6 OS=Homo sapiens GN=LILRA6 PE=2 SV=2	1.8	1.8	1	1	1	1	2.079	sp|Q6PI73|LIRA6_HUMAN
760	sp|Q9NZA1|CLIC5_HUMAN	HUMAN	Chloride intracellular channel protein 5 OS=Homo sapiens GN=CLIC5 PE=1 SV=2	1.77	2.45	2	1	1	1	4.146	sp|Q9NZA1|CLIC5_HUMAN	sp|Q96NY7|CLIC6_HUMAN
761	sp|P61769|B2MG_HUMAN	HUMAN	Beta-2-microglobulin OS=Homo sapiens GN=B2M PE=1 SV=1	1.77	1.77	1	1	1	1	19.33	sp|P61769|B2MG_HUMAN
762	sp|Q03519|TAP2_HUMAN	HUMAN	Antigen peptide transporter 2 OS=Homo sapiens GN=TAP2 PE=1 SV=1	1.74	1.77	1	1	1	1	1.312	sp|Q03519|TAP2_HUMAN
763	sp|P84077|ARF1_HUMAN	HUMAN	ADP-ribosylation factor 1 OS=Homo sapiens GN=ARF1 PE=1 SV=2	1.73	1.77	2	1	1	2	8.287	sp|P84077|ARF1_HUMAN	sp|P61204|ARF3_HUMAN
764	sp|P49773|HINT1_HUMAN	HUMAN	Histidine triad nucleotide-binding protein 1 OS=Homo sapiens GN=HINT1 PE=1 SV=2	1.72	1.73	1	1	1	2	15.87	sp|P49773|HINT1_HUMAN
765	sp|Q9NZN4|EHD2_HUMAN	HUMAN	EH domain-containing protein 2 OS=Homo sapiens GN=EHD2 PE=1 SV=2	1.7	3.23	1	0	0	0	4.42	sp|Q9NZN4|EHD2_HUMAN

## Sheet: Quantified Proteins n=354
Supplementary Table 2C: Summary of quantified proteins using iTRAQ
Protein N	Representative Accession	Name	# times detected out of 6 8-plex runs	Detected in 8-plex run #	Total samples n	Mann Whitney U test p value	Ratio
295	sp|P02768|ALBU_HUMAN	Serum albumin OS=Homo sapiens GN=ALB PE=1 SV=2	6	1,2,3,4,5,6	40	0.005	0.554626
58	sp|P07384|CAN1_HUMAN	Calpain-1 catalytic subunit OS=Homo sapiens GN=CAPN1 PE=1 SV=1	2	1,5	14	0.00506168	0.751623
306	sp|P50226|ST1A2_HUMAN	Sulfotransferase 1A2 OS=Homo sapiens GN=SULT1A2 PE=1 SV=1	3	1,4,5	21	0.011	0.583445
140	sp|Q14103|HNRPD_HUMAN	Heterogeneous nuclear ribonucleoprotein D0 OS=Homo sapiens GN=HNRNPD PE=1 SV=1	3	2,3,5	21	0.018	1.16413
282	sp|P61224|RAP1B_HUMAN	Ras-related protein Rap-1b OS=Homo sapiens GN=RAP1B PE=1 SV=1	2	3,5	14	0.026	0.685488
144	sp|P52790|HXK3_HUMAN	Hexokinase-3 OS=Homo sapiens GN=HK3 PE=2 SV=2	6	1,2,3,4,5,6	40	0.031	0.78343
6	sp|P62244|RS15A_HUMAN	40S ribosomal protein S15a OS=Homo sapiens GN=RPS15A PE=1 SV=2	2	2,3	14	0.032	1.05682
339	sp|P62988|UBIQ_HUMAN	Ubiquitin OS=Homo sapiens GN=RPS27A PE=1 SV=1	6	1,2,3,4,5,6	40	0.032	1.49279
84	sp|P20674|COX5A_HUMAN	Cytochrome c oxidase subunit 5A, mitochondrial OS=Homo sapiens GN=COX5A PE=1 SV=1	1	2	7	0.0338949	1.87068
34	sp|P35611|ADDA_HUMAN	Alpha-adducin OS=Homo sapiens GN=ADD1 PE=1 SV=2	1	1	7	0.034	1.83654
338	sp|Q9UMX0|UBQL1_HUMAN	Ubiquilin-1 OS=Homo sapiens GN=UBQLN1 PE=1 SV=2	1	2	7	0.034	0.630957
177	sp|P14174|MIF_HUMAN	Macrophage migration inhibitory factor OS=Homo sapiens GN=MIF PE=1 SV=4	6	1,2,3,4,5,6	40	0.042	0.679204
271	sp|Q13576|IQGA2_HUMAN	Ras GTPase-activating-like protein IQGAP2 OS=Homo sapiens GN=IQGAP2 PE=1 SV=3	1	2	7	0.05	3.22107
305	sp|P50225|ST1A1_HUMAN	Sulfotransferase 1A1 OS=Homo sapiens GN=SULT1A1 PE=1 SV=2	1	3	7	0.05	1.23027
159	sp|Q9Y624|JAM1_HUMAN	Junctional adhesion molecule A OS=Homo sapiens GN=F11R PE=1 SV=1	1	5	7	0.051	0.78343
223	sp|P13796|PLSL_HUMAN	Plastin-2 OS=Homo sapiens GN=LCP1 PE=1 SV=5	6	1,2,3,4,5,6	40	0.053	1.42561
73	sp|Q00610|CLH1_HUMAN	Clathrin heavy chain 1 OS=Homo sapiens GN=CLTC PE=1 SV=5	6	1,2,3,4,5,6	40	0.0532691	1.41254
240	sp|P40306|PSB10_HUMAN	Proteasome subunit beta type-10 OS=Homo sapiens GN=PSMB10 PE=1 SV=1	2	3,6	12	0.061	1.5417
16	sp|P61160|ARP2_HUMAN	Actin-related protein 2 OS=Homo sapiens GN=ACTR2 PE=1 SV=1	4	1,2,3,6	26	0.065	0.787046
107	sp|P02751|FINC_HUMAN	Fibronectin OS=Homo sapiens GN=FN1 PE=1 SV=3	3	1,2,5	21	0.07	0.717794
280	sp|P51149|RAB7A_HUMAN	Ras-related protein Rab-7a OS=Homo sapiens GN=RAB7A PE=1 SV=1	2	3,5	14	0.072	0.654636
4	sp|P63104|1433Z_HUMAN	14-3-3 protein zeta/delta OS=Homo sapiens GN=YWHAZ PE=1 SV=1	6	1,2,3,4,5,6	40	0.075	1.30017
183	sp|P14780|MMP9_HUMAN	Matrix metalloproteinase-9 OS=Homo sapiens GN=MMP9 PE=1 SV=2	6	1,2,3,4,5,6	40	0.077	0.801678
250	sp|Q96M27|PRRC1_HUMAN	Protein PPRC1 OS=Homo sapiens GN=PRRC1 PE=2 SV=1	1	1	7	0.077	1.78649
40	sp|P09525|ANXA4_HUMAN	Annexin A4 OS=Homo sapiens GN=ANXA4 PE=1 SV=4	4	1,2,3,5	28	0.078	0.895365
156	sp|P05106|ITB3_HUMAN	Integrin beta-3 OS=Homo sapiens GN=ITGB3 PE=1 SV=2	6	1,2,3,4,5,6	40	0.08	0.608135
19	sp|P59998|ARPC4_HUMAN	Actin-related protein 2/3 complex subunit 4 OS=Homo sapiens GN=ARPC4 PE=1 SV=3	4	2,3,4,6	26	0.082	0.648634
310	sp|Q9Y490|TLN1_HUMAN	Talin-1 OS=Homo sapiens GN=TLN1 PE=1 SV=3	6	1,2,3,4,5,6	40	0.082	0.496592
168	sp|P48059|LIMS1_HUMAN	LIM and senescent cell antigen-like-containing domain protein 1 OS=Homo sapiens GN=LIMS1 PE=1 SV=4	1	6	5	0.083	1.57036
191	sp|P35579|MYH9_HUMAN	Myosin-9 OS=Homo sapiens GN=MYH9 PE=1 SV=4	6	1,2,3,4,5,6	40	0.084	1.47911
69	sp|Q13231|CHIT1_HUMAN	Chitotriosidase-1 OS=Homo sapiens GN=CHIT1 PE=1 SV=1	6	1,2,3,4,5,6	40	0.0894995	1.62181
28	sp|Q10588|BST1_HUMAN	ADP-ribosyl cyclase 2 OS=Homo sapiens GN=BST1 PE=1 SV=2	6	1,2,3,4,5,6	40	0.095	1.38676
165	sp|P08246|ELNE_HUMAN	Leukocyte elastase OS=Homo sapiens GN=ELA2 PE=1 SV=1	6	1,2,3,4,5,6	40	0.095	1.2942
42	sp|P08133|ANXA6_HUMAN	Annexin A6 OS=Homo sapiens GN=ANXA6 PE=1 SV=3	6	1,2,3,4,5,6	40	0.103	1.1272
276	sp|O00194|RB27B_HUMAN	Ras-related protein Rab-27B OS=Homo sapiens GN=RAB27B PE=1 SV=4	1	2	7	0.108	1.72982
21	sp|P07741|APT_HUMAN	Adenine phosphoribosyltransferase OS=Homo sapiens GN=APRT PE=1 SV=2	2	2,5	14	0.109	0.870964
170	sp|P07195|LDHB_HUMAN	L-lactate dehydrogenase B chain OS=Homo sapiens GN=LDHB PE=1 SV=2	6	1,2,3,4,5,6	40	0.109	1.1695
300	sp|Q8TDB8|GTR14_HUMAN	Solute carrier family 2, facilitated glucose transporter member 14 OS=Homo sapiens GN=SLC2A14 PE=2 SV=1	1	5	7	0.121	0.78343
94	sp|O94919|ENDD1_HUMAN	Endonuclease domain-containing 1 protein OS=Homo sapiens GN=ENDOD1 PE=1 SV=2	2	1,2	14	0.121335	1.62181
22	sp|P23526|SAHH_HUMAN	Adenosylhomocysteinase OS=Homo sapiens GN=AHCY PE=1 SV=4	5	1,2,3,5,6	33	0.122	0.874984
89	sp|P04844|RPN2_HUMAN	Dolichyl-diphosphooligosaccharide--protein glycosyltransferase subunit 2 OS=Homo sapiens GN=RPN2 PE=1 SV=3	3	1,2,3	21	0.126035	1.12202
105	sp|P02675|FIBB_HUMAN	Fibrinogen beta chain OS=Homo sapiens GN=FGB PE=1 SV=2	6	1,2,3,4,5,6	40	0.132	0.572796
129	sp|Q9NUV9|GIMA4_HUMAN	GTPase IMAP family member 4 OS=Homo sapiens GN=GIMAP4 PE=1 SV=1	3	1,2,3	21	0.135	1.54882
45	sp|P02647|APOA1_HUMAN	Apolipoprotein A-I OS=Homo sapiens GN=APOA1 PE=1 SV=1	3	2,3,5	21	0.137	0.737904
149	sp|P01834|IGKC_HUMAN	Ig kappa chain C region OS=Homo sapiens GN=IGKC PE=1 SV=1	2	1,3	14	0.137	1.39316
216	sp|P30041|PRDX6_HUMAN	Peroxiredoxin-6 OS=Homo sapiens GN=PRDX6 PE=1 SV=3	4	1,4,5,6	26	0.14	0.912011
36	sp|P54920|SNAA_HUMAN	Alpha-soluble NSF attachment protein OS=Homo sapiens GN=NAPA PE=1 SV=3	2	1,5	14	0.142	0.895365
154	sp|P11215|ITAM_HUMAN	Integrin alpha-M OS=Homo sapiens GN=ITGAM PE=1 SV=2	5	1,2,3,5,6	33	0.145	0.605341
95	sp|Q96AP7|ESAM_HUMAN	Endothelial cell-selective adhesion molecule OS=Homo sapiens GN=ESAM PE=1 SV=1	1	1	7	0.153576	0.972747
296	sp|P10768|ESTD_HUMAN	S-formylglutathione hydrolase OS=Homo sapiens GN=ESD PE=1 SV=2	2	1,3	14	0.156	1.37404
302	sp|P38646|GRP75_HUMAN	Stress-70 protein, mitochondrial OS=Homo sapiens GN=HSPA9 PE=1 SV=2	2	3,4	14	0.156	1.24165
48	sp|Q8NHH9|ATLA2_HUMAN	Atlastin-2 OS=Homo sapiens GN=ARL6IP2 PE=2 SV=2	1	1	7	0.157	1.52757
126	sp|Q9HC38|GLOD4_HUMAN	Glyoxalase domain-containing protein 4 OS=Homo sapiens GN=GLOD4 PE=1 SV=1	1	3	7	0.157	0.534564
145	sp|Q9BX68|HINT2_HUMAN	Histidine triad nucleotide-binding protein 2 OS=Homo sapiens GN=HINT2 PE=1 SV=1	1	2	7	0.157	1.28825
147	sp|P30484|1B46_HUMAN	HLA class I histocompatibility antigen, B-46 alpha chain OS=Homo sapiens GN=HLA-B PE=2 SV=1	1	1	7	0.157	0.570164
186	sp|P08571|CD14_HUMAN	Monocyte differentiation antigen CD14 OS=Homo sapiens GN=CD14 PE=1 SV=2	1	1	7	0.157	1.99526
237	sp|P28066|PSA5_HUMAN	Proteasome subunit alpha type-5 OS=Homo sapiens GN=PSMA5 PE=1 SV=3	1	1	7	0.157	1.25893
249	sp|P05771|KPCB_HUMAN	Protein kinase C beta type OS=Homo sapiens GN=PRKCB1 PE=1 SV=4	1	2	7	0.157	1.34896
330	sp|Q13885|TBB2A_HUMAN	Tubulin beta-2A chain OS=Homo sapiens GN=TUBB2A PE=1 SV=1	1	3	7	0.157	0.698232
352	sp|Q13303|KCAB2_HUMAN	Voltage-gated potassium channel subunit beta-2 OS=Homo sapiens GN=KCNAB2 PE=1 SV=2	1	3	7	0.157	0.597035
39	sp|P12429|ANXA3_HUMAN	Annexin A3 OS=Homo sapiens GN=ANXA3 PE=1 SV=3	6	1,2,3,4,5,6	40	0.159	0.859014
150	sp|Q14974|IMB1_HUMAN	Importin subunit beta-1 OS=Homo sapiens GN=KPNB1 PE=1 SV=2	2	3,5	14	0.162	1.22462
205	sp|P10153|RNAS2_HUMAN	Non-secretory ribonuclease OS=Homo sapiens GN=RNASE2 PE=1 SV=2	2	1,5	14	0.162	1.22462
290	sp|Q16181|SEPT7_HUMAN	Septin-7 OS=Homo sapiens GN=SEPT7 PE=1 SV=2	2	1,5	14	0.162	0.483059
133	sp|P08107|HSP71_HUMAN	Heat shock 70 kDa protein 1 OS=Homo sapiens GN=HSPA1A PE=1 SV=5	6	1,2,3,4,5,6	40	0.163	0.91622
203	sp|P43490|NAMPT_HUMAN	Nicotinamide phosphoribosyltransferase OS=Homo sapiens GN=NAMPT PE=1 SV=1	6	1,2,3,4,5,6	40	0.167	0.843335
217	sp|Q15067|ACOX1_HUMAN	Peroxisomal acyl-coenzyme A oxidase 1 OS=Homo sapiens GN=ACOX1 PE=1 SV=3	1	5	7	0.171	1.37404
9	sp|P52209|6PGD_HUMAN	6-phosphogluconate dehydrogenase, decarboxylating OS=Homo sapiens GN=PGD PE=1 SV=3	6	1,2,3,4,5,6	40	0.172	1.24165
268	sp|P14618|KPYM_HUMAN	Pyruvate kinase isozymes M1/M2 OS=Homo sapiens GN=PKM2 PE=1 SV=4	6	1,2,3,4,5,6	40	0.172	0.903649
201	sp|P59666|DEF3_HUMAN	Neutrophil defensin 3 OS=Homo sapiens GN=DEFA3 PE=1 SV=1	6	1,2,3,4,5,6	40	0.185	0.827942
101	sp|P52907|CAZA1_HUMAN	F-actin-capping protein subunit alpha-1 OS=Homo sapiens GN=CAPZA1 PE=1 SV=3	2	3,6	12	0.193	1.1695
207	sp|P22392|NDKB_HUMAN	Nucleoside diphosphate kinase B OS=Homo sapiens GN=NME2 PE=1 SV=1	6	1,2,3,4,5,6	40	0.194	1.1324
82	sp|P04839|CY24B_HUMAN	Cytochrome b-245 heavy chain OS=Homo sapiens GN=CYBB PE=1 SV=2	5	1,2,3,4,5	35	0.200617	0.820352
15	sp|P63261|ACTG_HUMAN	Actin, cytoplasmic 2 OS=Homo sapiens GN=ACTG1 PE=1 SV=1	6	1,2,3,4,5,6	40	0.204	0.751623
14	sp|P68032|ACTC_HUMAN	Actin, alpha cardiac muscle 1 OS=Homo sapiens GN=ACTC1 PE=1 SV=1	2	3,5	14	0.205	0.192309
18	sp|O15145|ARPC3_HUMAN	Actin-related protein 2/3 complex subunit 3 OS=Homo sapiens GN=ARPC3 PE=1 SV=3	2	4,5	14	0.205	1.44544
233	sp|Q8WUM4|PDC6I_HUMAN	Programmed cell death 6-interacting protein OS=Homo sapiens GN=PDCD6IP PE=1 SV=1	1	2	7	0.212	1.51356
242	sp|P49720|PSB3_HUMAN	Proteasome subunit beta type-3 OS=Homo sapiens GN=PSMB3 PE=1 SV=2	4	1,2,3,5	28	0.212	1.1272
153	sp|P08514|ITA2B_HUMAN	Integrin alpha-IIb OS=Homo sapiens GN=ITGA2B PE=1 SV=2	6	1,2,3,4,5,6	40	0.214	0.835603
336	sp|P29350|PTN6_HUMAN	Tyrosine-protein phosphatase non-receptor type 6 OS=Homo sapiens GN=PTPN6 PE=1 SV=1	4	1,4,5,6	26	0.215	1.27057
97	sp|Q05315|LPPL_HUMAN	Eosinophil lysophospholipase OS=Homo sapiens GN=CLC PE=1 SV=2	5	1,2,3,4,5	35	0.219	1.18032
32	sp|P02763|A1AG1_HUMAN	Alpha-1-acid glycoprotein 1 OS=Homo sapiens GN=ORM1 PE=1 SV=1	2	1,5	14	0.23	0.83946
284	sp|Q9HD89|RETN_HUMAN	Resistin OS=Homo sapiens GN=RETN PE=2 SV=1	5	1,2,3,5,6	33	0.231	0.76913
313	sp|P07996|TSP1_HUMAN	Thrombospondin-1 OS=Homo sapiens GN=THBS1 PE=1 SV=2	6	1,2,3,4,5,6	40	0.241	0.835603
146	sp|P30480|1B42_HUMAN	HLA class I histocompatibility antigen, B-42 alpha chain OS=Homo sapiens GN=HLA-B PE=1 SV=1	1	5	7	0.245	0.701455
265	sp|Q5VYJ4|RUEL1_HUMAN	Putative small nuclear ribonucleoprotein polypeptide E-like protein 1 OS=Homo sapiens GN=SNRPEL1 PE=5 SV=1	1	5	7	0.245	1.93197
327	sp|P23381|SYWC_HUMAN	Tryptophanyl-tRNA synthetase, cytoplasmic OS=Homo sapiens GN=WARS PE=1 SV=2	1	5	7	0.245	0.76913
343	sp|Q9P1F3|CF115_HUMAN	Uncharacterized protein C6orf115 OS=Homo sapiens GN=C6orf115 PE=1 SV=1	2	1,2	14	0.245	0.907821
227	sp|P07359|GP1BA_HUMAN	Platelet glycoprotein Ib alpha chain OS=Homo sapiens GN=GP1BA PE=1 SV=1	5	1,2,3,5,6	33	0.246	0.820352
287	sp|P52565|GDIR1_HUMAN	Rho GDP-dissociation inhibitor 1 OS=Homo sapiens GN=ARHGDIA PE=1 SV=3	4	3,4,5,6	26	0.246	0.824138
285	sp|O95197|RTN3_HUMAN	Reticulon-3 OS=Homo sapiens GN=RTN3 PE=1 SV=2	1	6	5	0.248	0.688652
92	sp|Q9H4M9|EHD1_HUMAN	EH domain-containing protein 1 OS=Homo sapiens GN=EHD1 PE=1 SV=2	1	6	5	0.248213	1.19124
77	sp|P23528|COF1_HUMAN	Cofilin-1 OS=Homo sapiens GN=CFL1 PE=1 SV=3	5	2,3,4,5,6	33	0.261005	0.950605
158	sp|P48735|IDHP_HUMAN	Isocitrate dehydrogenase [NADP], mitochondrial OS=Homo sapiens GN=IDH2 PE=1 SV=2	3	1,2,6	19	0.265	1.0617
106	sp|P02679|FIBG_HUMAN	Fibrinogen gamma chain OS=Homo sapiens GN=FGG PE=1 SV=3	6	1,2,3,4,5,6	40	0.282	0.669885
345	sp|P21283|VATC1_HUMAN	Vacuolar proton pump subunit C 1 OS=Homo sapiens GN=ATP6V1C1 PE=1 SV=4	1	1	7	0.285	1.55597
278	sp|P61020|RAB5B_HUMAN	Ras-related protein Rab-5B OS=Homo sapiens GN=RAB5B PE=1 SV=1	2	2,5	14	0.286	0.83946
72	sp|Q13185|CBX3_HUMAN	Chromobox protein homolog 3 OS=Homo sapiens GN=CBX3 PE=1 SV=4	6	1,2,3,4,5,6	40	0.287758	1.1749
63	sp|P16152|CBR1_HUMAN	Carbonyl reductase [NADPH] 1 OS=Homo sapiens GN=CBR1 PE=1 SV=3	1	2	7	0.288844	1.58489
83	sp|P99999|CYC_HUMAN	Cytochrome c OS=Homo sapiens GN=CYCS PE=1 SV=2	1	1	7	0.288844	0.508159
87	sp|P28838|AMPL_HUMAN	Cytosol aminopeptidase OS=Homo sapiens GN=LAP3 PE=1 SV=3	1	1	7	0.288844	1.71396
98	sp|P61916|NPC2_HUMAN	Epididymal secretory protein E1 OS=Homo sapiens GN=NPC2 PE=1 SV=1	1	4	7	0.288844	0.928966
7	sp|P10809|CH60_HUMAN	60 kDa heat shock protein, mitochondrial OS=Homo sapiens GN=HSPD1 PE=1 SV=2	1	1	7	0.289	1.52757
172	sp|P08637|FCG3A_HUMAN	Low affinity immunoglobulin gamma Fc region receptor III-A OS=Homo sapiens GN=FCGR3A PE=2 SV=2	1	1	7	0.289	0.731139
209	sp|Q92882|OSTF1_HUMAN	Osteoclast-stimulating factor 1 OS=Homo sapiens GN=OSTF1 PE=1 SV=2	1	1	7	0.289	0.639735
272	sp|Q7LDG7|GRP2_HUMAN	RAS guanyl-releasing protein 2 OS=Homo sapiens GN=RASGRP2 PE=1 SV=1	1	3	7	0.289	0.762079
283	sp|P61225|RAP2B_HUMAN	Ras-related protein Rap-2b OS=Homo sapiens GN=RAP2B PE=1 SV=1	1	2	7	0.289	1.34896
348	sp|O14975|S27A2_HUMAN	Very long-chain acyl-CoA synthetase OS=Homo sapiens GN=SLC27A2 PE=1 SV=1	1	3	7	0.289	0.724436
354	sp|Q15942|ZYX_HUMAN	Zyxin OS=Homo sapiens GN=ZYX PE=1 SV=1	1	3	7	0.289	0.77983
85	sp|Q9HBI6|CP4FB_HUMAN	Cytochrome P450 4F11 OS=Homo sapiens GN=CYP4F11 PE=2 SV=2	2	1,6	12	0.291152	0.737904
26	sp|Q01518|CAP1_HUMAN	Adenylyl cyclase-associated protein 1 OS=Homo sapiens GN=CAP1 PE=1 SV=4	6	1,2,3,4,5,6	40	0.294	0.92045
30	sp|O43488|ARK72_HUMAN	Aflatoxin B1 aldehyde reductase member 2 OS=Homo sapiens GN=AKR7A2 PE=1 SV=3	3	3,4,5	21	0.294	1.00925
181	sp|P40926|MDHM_HUMAN	Malate dehydrogenase, mitochondrial OS=Homo sapiens GN=MDH2 PE=1 SV=2	6	1,2,3,4,5,6	40	0.307	0.797995
125	sp|P46976|GLYG_HUMAN	Glycogenin-1 OS=Homo sapiens GN=GYG1 PE=1 SV=4	2	5,6	12	0.308	1.27644
141	sp|P61978|HNRPK_HUMAN	Heterogeneous nuclear ribonucleoprotein K OS=Homo sapiens GN=HNRNPK PE=1 SV=1	2	5,6	12	0.308	0.567545
341	sp|P22314|UBA1_HUMAN	Ubiquitin-like modifier-activating enzyme 1 OS=Homo sapiens GN=UBA1 PE=1 SV=3	3	1,2,5	21	0.311	0.963829
113	sp|P06396|GELS_HUMAN	Gelsolin OS=Homo sapiens GN=GSN PE=1 SV=1	6	1,2,3,4,5,6	40	0.313	0.907821
190	sp|P19105|MRLC3_HUMAN	Myosin regulatory light chain MRLC3 OS=Homo sapiens GN=MRLC3 PE=1 SV=2	6	1,2,3,4,5,6	40	0.313	1.09648
131	sp|P04899|GNAI2_HUMAN	Guanine nucleotide-binding protein G(i), alpha-2 subunit OS=Homo sapiens GN=GNAI2 PE=1 SV=3	5	1,2,3,5,6	33	0.32	0.843335
167	sp|P09960|LKHA4_HUMAN	Leukotriene A-4 hydrolase OS=Homo sapiens GN=LTA4H PE=1 SV=2	6	1,2,3,4,5,6	40	0.32	0.827942
65	sp|P49913|CAMP_HUMAN	Cathelicidin antimicrobial peptide OS=Homo sapiens GN=CAMP PE=1 SV=1	6	1,2,3,4,5,6	40	0.320234	0.859014
258	sp|Q70J99|UN13D_HUMAN	Protein unc-13 homolog D OS=Homo sapiens GN=UNC13D PE=1 SV=1	4	1,2,4,6	26	0.324	1.00925
269	sp|P50395|GDIB_HUMAN	Rab GDP dissociation inhibitor beta OS=Homo sapiens GN=GDI2 PE=1 SV=2	6	1,2,3,4,5,6	40	0.327	0.937562
8	sp|P17858|K6PL_HUMAN	6-phosphofructokinase, liver type OS=Homo sapiens GN=PFKL PE=1 SV=6	3	2,5,6	19	0.331	0.772681
127	sp|Q9Y4H4|GPSM3_HUMAN	G-protein-signaling modulator 3 OS=Homo sapiens GN=GPSM3 PE=1 SV=1	2	1,4	14	0.332	1.1272
132	sp|P00738|HPT_HUMAN	Haptoglobin OS=Homo sapiens GN=HP PE=1 SV=1	6	1,2,3,4,5,6	40	0.334	0.995405
254	sp|P05109|S10A8_HUMAN	Protein S100-A8 OS=Homo sapiens GN=S100A8 PE=1 SV=1	6	1,2,3,4,5,6	40	0.334	0.695024
50	sp|P12956|KU70_HUMAN	ATP-dependent DNA helicase 2 subunit 1 OS=Homo sapiens GN=XRCC6 PE=1 SV=2	4	1,2,4,5	28	0.346	1.1272
119	sp|P78417|GSTO1_HUMAN	Glutathione transferase omega-1 OS=Homo sapiens GN=GSTO1 PE=1 SV=2	6	1,2,3,4,5,6	40	0.362	1.30617
47	sp|P05089|ARGI1_HUMAN	Arginase-1 OS=Homo sapiens GN=ARG1 PE=1 SV=2	2	1,3	14	0.366	1.20781
179	sp|Q14764|MVP_HUMAN	Major vault protein OS=Homo sapiens GN=MVP PE=1 SV=4	2	1,3	14	0.366	1.25314
71	sp|P83916|CBX1_HUMAN	Chromobox protein homolog 1 OS=Homo sapiens GN=CBX1 PE=1 SV=1	2	1,2	14	0.366157	1.37404
91	sp|P22681|CBL_HUMAN	E3 ubiquitin-protein ligase CBL OS=Homo sapiens GN=CBL PE=1 SV=1	1	1	7	0.368066	0.583445
224	sp|P02775|CXCL7_HUMAN	Platelet basic protein OS=Homo sapiens GN=PPBP PE=1 SV=3	6	1,2,3,4,5,6	40	0.37	0.636796
246	sp|Q15084|PDIA6_HUMAN	Protein disulfide-isomerase A6 OS=Homo sapiens GN=PDIA6 PE=1 SV=1	1	2	7	0.372	1.08143
325	sp|P06753|TPM3_HUMAN	Tropomyosin alpha-3 chain OS=Homo sapiens GN=TPM3 PE=1 SV=1	6	1,2,3,4,5,6	40	0.377	1.20226
176	sp|P61626|LYSC_HUMAN	Lysozyme C OS=Homo sapiens GN=LYZ PE=1 SV=1	6	1,2,3,4,5,6	40	0.384	0.557186
178	sp|P40121|CAPG_HUMAN	Macrophage-capping protein OS=Homo sapiens GN=CAPG PE=1 SV=1	3	2,4,5	21	0.385	1.09648
229	sp|Q9H7M9|GI24_HUMAN	Platelet receptor Gi24 OS=Homo sapiens GN=C10orf54 PE=1 SV=2	2	3,5	14	0.386	1.23595
256	sp|P25815|S100P_HUMAN	Protein S100-P OS=Homo sapiens GN=S100P PE=1 SV=2	2	2,5	14	0.386	1.1272
337	sp|O95777|LSM8_HUMAN	U6 snRNA-associated Sm-like protein LSm8 OS=Homo sapiens GN=LSM8 PE=1 SV=3	2	2,5	14	0.386	0.642688
189	sp|P60660|MYL6_HUMAN	Myosin light polypeptide 6 OS=Homo sapiens GN=MYL6 PE=1 SV=2	6	1,2,3,4,5,6	40	0.392	0.92045
152	sp|P23229|ITA6_HUMAN	Integrin alpha-6 OS=Homo sapiens GN=ITGA6 PE=1 SV=3	4	2,3,4,5	28	0.397	0.92045
220	sp|Q96G03|PGM2_HUMAN	Phosphoglucomutase-2 OS=Homo sapiens GN=PGM2 PE=1 SV=4	5	1,2,4,5,6	33	0.397	0.94189
298	sp|O75368|SH3L1_HUMAN	SH3 domain-binding glutamic acid-rich-like protein OS=Homo sapiens GN=SH3BGRL PE=1 SV=1	4	1,2,5,6	26	0.399	0.912011
75	sp|P00488|F13A_HUMAN	Coagulation factor XIII A chain OS=Homo sapiens GN=F13A1 PE=1 SV=4	6	1,2,3,4,5,6	40	0.407449	0.954993
228	sp|P13224|GP1BB_HUMAN	Platelet glycoprotein Ib beta chain OS=Homo sapiens GN=GP1BB PE=1 SV=1	6	1,2,3,4,5,6	40	0.415	0.851138
303	sp|P31948|STIP1_HUMAN	Stress-induced-phosphoprotein 1 OS=Homo sapiens GN=STIP1 PE=1 SV=1	2	4,5	14	0.423	0.758578
288	sp|P52566|GDIR2_HUMAN	Rho GDP-dissociation inhibitor 2 OS=Homo sapiens GN=ARHGDIB PE=1 SV=3	6	1,2,3,4,5,6	40	0.431	1.18032
318	sp|P37837|TALDO_HUMAN	Transaldolase OS=Homo sapiens GN=TALDO1 PE=1 SV=2	6	1,2,3,4,5,6	40	0.431	1.1324
234	sp|P25786|PSA1_HUMAN	Proteasome subunit alpha type-1 OS=Homo sapiens GN=PSMA1 PE=1 SV=1	3	1,2,3	21	0.434	0.91622
128	sp|P28676|GRAN_HUMAN	Grancalcin OS=Homo sapiens GN=GCA PE=1 SV=2	1	5	7	0.439	1.2942
143	sp|Q00839|HNRPU_HUMAN	Heterogeneous nuclear ribonucleoprotein U OS=Homo sapiens GN=HNRNPU PE=1 SV=5	1	5	7	0.439	1.55597
200	sp|Q15080|NCF4_HUMAN	Neutrophil cytosol factor 4 OS=Homo sapiens GN=NCF4 PE=1 SV=2	2	1,2	14	0.439	0.78343
231	sp|P26599|PTBP1_HUMAN	Polypyrimidine tract-binding protein 1 OS=Homo sapiens GN=PTBP1 PE=1 SV=1	1	5	7	0.439	0.827942
266	sp|A6NL28|TPM3L_HUMAN	Putative tropomyosin alpha-3 chain-like protein OS=Homo sapiens PE=5 SV=2	1	5	7	0.439	0.724436
275	sp|Q9H0U4|RAB1B_HUMAN	Ras-related protein Rab-1B OS=Homo sapiens GN=RAB1B PE=1 SV=1	1	5	7	0.439	0.866962
340	sp|Q96FW1|OTUB1_HUMAN	Ubiquitin thioesterase OTUB1 OS=Homo sapiens GN=OTUB1 PE=1 SV=2	1	5	7	0.439	1.01859
346	sp|O95498|VNN2_HUMAN	Vascular non-inflammatory molecule 2 OS=Homo sapiens GN=VNN2 PE=1 SV=3	1	5	7	0.439	1.61436
56	sp|P27824|CALX_HUMAN	Calnexin OS=Homo sapiens GN=CANX PE=1 SV=2	6	1,2,3,4,5,6	40	0.447659	1
252	sp|P80511|S10AC_HUMAN	Protein S100-A12 OS=Homo sapiens GN=S100A12 PE=1 SV=2	5	2,3,4,5,6	33	0.45	1.16413
304	sp|O00391|QSOX1_HUMAN	Sulfhydryl oxidase 1 OS=Homo sapiens GN=QSOX1 PE=1 SV=3	2	3,5	14	0.463	1.14815
104	sp|P02671|FIBA_HUMAN	Fibrinogen alpha chain OS=Homo sapiens GN=FGA PE=1 SV=2	6	1,2,3,4,5,6	40	0.464	0.776247
99	sp|P27105|STOM_HUMAN	Erythrocyte band 7 integral membrane protein OS=Homo sapiens GN=STOM PE=1 SV=3	6	1,2,3,4,5,6	40	0.464303	0.977237
171	sp|P33121|ACSL1_HUMAN	Long-chain-fatty-acid--CoA ligase 1 OS=Homo sapiens GN=ACSL1 PE=1 SV=1	3	1,2,5	21	0.468	1.20226
103	sp|Q86UX7|URP2_HUMAN	Fermitin family homolog 3 OS=Homo sapiens GN=FERMT3 PE=1 SV=1	3	1,3,5	21	0.469	0.731139
114	sp|P11413|G6PD_HUMAN	Glucose-6-phosphate 1-dehydrogenase OS=Homo sapiens GN=G6PD PE=1 SV=4	5	2,3,4,5,6	33	0.472	0.968278
37	sp|P04083|ANXA1_HUMAN	Annexin A1 OS=Homo sapiens GN=ANXA1 PE=1 SV=2	6	1,2,3,4,5,6	40	0.473	0.78343
219	sp|P36871|PGM1_HUMAN	Phosphoglucomutase-1 OS=Homo sapiens GN=PGM1 PE=1 SV=3	1	3	7	0.476	1.18032
175	sp|P13473|LAMP2_HUMAN	Lysosome-associated membrane glycoprotein 2 OS=Homo sapiens GN=LAMP2 PE=1 SV=2	5	1,2,3,4,5	35	0.479	1.02329
3	sp|P27348|1433T_HUMAN	14-3-3 protein theta OS=Homo sapiens GN=YWHAQ PE=1 SV=1	1	2	7	0.48	0.707946
23	sp|P00568|KAD1_HUMAN	Adenylate kinase isoenzyme 1 OS=Homo sapiens GN=AK1 PE=1 SV=3	1	2	7	0.48	1.1272
24	sp|P54819|KAD2_HUMAN	Adenylate kinase isoenzyme 2, mitochondrial OS=Homo sapiens GN=AK2 PE=1 SV=2	1	1	7	0.48	1.30017
123	sp|P11216|PYGB_HUMAN	Glycogen phosphorylase, brain form OS=Homo sapiens GN=PYGB PE=1 SV=5	1	3	7	0.48	1.14815
257	sp|Q01105|SET_HUMAN	Protein SET OS=Homo sapiens GN=SET PE=1 SV=3	1	1	7	0.48	1.32434
274	sp|P63000|RAC1_HUMAN	Ras-related C3 botulinum toxin substrate 1 OS=Homo sapiens GN=RAC1 PE=1 SV=1	4	1,3,4,5	28	0.48	1.21339
291	sp|Q13043|STK4_HUMAN	Serine/threonine-protein kinase 4 OS=Homo sapiens GN=STK4 PE=1 SV=2	1	2	7	0.48	0.801678
292	sp|Q66LE6|2ABD_HUMAN	Serine/threonine-protein phosphatase 2A 55 kDa regulatory subunit B delta isoform OS=Homo sapiens GN=PPP2R2D PE=2 SV=1	1	1	7	0.48	0.78343
328	sp|Q71U36|TBA1A_HUMAN	Tubulin alpha-1A chain OS=Homo sapiens GN=TUBA1A PE=1 SV=1	1	2	7	0.48	1.23595
333	sp|Q6IBS0|TWF2_HUMAN	Twinfilin-2 OS=Homo sapiens GN=TWF2 PE=1 SV=2	1	2	7	0.48	0.887156
160	sp|P02788|TRFL_HUMAN	Lactotransferrin OS=Homo sapiens GN=LTF PE=1 SV=6	6	1,2,3,4,5,6	40	0.481	1.2942
238	sp|P60900|PSA6_HUMAN	Proteasome subunit alpha type-6 OS=Homo sapiens GN=PSMA6 PE=1 SV=1	6	1,2,3,4,5,6	40	0.481	1.0666
263	sp|P00491|PNPH_HUMAN	Purine nucleoside phosphorylase OS=Homo sapiens GN=NP PE=1 SV=2	6	1,2,3,4,5,6	40	0.481	0.907821
164	sp|P30740|ILEU_HUMAN	Leukocyte elastase inhibitor OS=Homo sapiens GN=SERPINB1 PE=1 SV=1	6	1,2,3,4,5,6	40	0.49	1.08643
17	sp|O15144|ARPC2_HUMAN	Actin-related protein 2/3 complex subunit 2 OS=Homo sapiens GN=ARPC2 PE=1 SV=1	6	1,2,3,4,5,6	40	0.499	0.928966
247	sp|P07237|PDIA1_HUMAN	Protein disulfide-isomerase OS=Homo sapiens GN=P4HB PE=1 SV=3	6	1,2,3,4,5,6	40	0.499	1.01859
270	sp|P46940|IQGA1_HUMAN	Ras GTPase-activating-like protein IQGAP1 OS=Homo sapiens GN=IQGAP1 PE=1 SV=1	6	1,2,3,4,5,6	40	0.508	0.895365
311	sp|P10599|THIO_HUMAN	Thioredoxin OS=Homo sapiens GN=TXN PE=1 SV=3	6	1,2,3,4,5,6	40	0.508	0.88308
184	sp|Q15691|MARE1_HUMAN	Microtubule-associated protein RP/EB family member 1 OS=Homo sapiens GN=MAPRE1 PE=1 SV=3	3	3,4,6	19	0.509	0.866962
204	sp|Q6XQN6|PNCB_HUMAN	Nicotinate phosphoribosyltransferase OS=Homo sapiens GN=NAPRT1 PE=1 SV=2	4	1,2,4,5	28	0.51	1.7378
124	sp|P06737|PYGL_HUMAN	Glycogen phosphorylase, liver form OS=Homo sapiens GN=PYGL PE=1 SV=4	6	1,2,3,4,5,6	40	0.516	0.959401
187	sp|P24158|PRTN3_HUMAN	Myeloblastin OS=Homo sapiens GN=PRTN3 PE=1 SV=3	6	1,2,3,4,5,6	40	0.516	1.5417
226	sp|P16671|CD36_HUMAN	Platelet glycoprotein 4 OS=Homo sapiens GN=CD36 PE=1 SV=2	2	1,2	14	0.518	0.797995
93	sp|P13639|EF2_HUMAN	Elongation factor 2 OS=Homo sapiens GN=EEF2 PE=1 SV=4	2	1,2	14	0.518145	1.11686
111	sp|P04075|ALDOA_HUMAN	Fructose-bisphosphate aldolase A OS=Homo sapiens GN=ALDOA PE=1 SV=2	6	1,2,3,4,5,6	40	0.525	0.887156
52	sp|P20160|CAP7_HUMAN	Azurocidin OS=Homo sapiens GN=AZU1 PE=1 SV=3	4	1,4,5,6	26	0.526877	1.04232
195	sp|P00387|NB5R3_HUMAN	NADH-cytochrome b5 reductase 3 OS=Homo sapiens GN=CYB5R3 PE=1 SV=3	5	1,2,3,4,5	35	0.544	0.990832
236	sp|P25789|PSA4_HUMAN	Proteasome subunit alpha type-4 OS=Homo sapiens GN=PSMA4 PE=1 SV=1	3	1,2,4	21	0.546	0.879023
244	sp|O60888|CUTA_HUMAN	Protein CutA OS=Homo sapiens GN=CUTA PE=1 SV=2	2	3,5	14	0.548	1.14815
182	sp|O43451|MGA_HUMAN	Maltase-glucoamylase, intestinal OS=Homo sapiens GN=MGAM PE=1 SV=4	2	1,5	14	0.549	1.11686
169	sp|P00338|LDHA_HUMAN	L-lactate dehydrogenase A chain OS=Homo sapiens GN=LDHA PE=1 SV=2	6	1,2,3,4,5,6	40	0.553	1.08643
188	sp|P05164|PERM_HUMAN	Myeloperoxidase OS=Homo sapiens GN=MPO PE=1 SV=1	6	1,2,3,4,5,6	40	0.553	1.05682
31	sp|Q8TBG4|AT2L1_HUMAN	Alanine--glyoxylate aminotransferase 2-like 1 OS=Homo sapiens GN=AGXT2L1 PE=2 SV=1	1	5	7	0.558	0.968278
13	sp|Q13510|ASAH1_HUMAN	Acid ceramidase OS=Homo sapiens GN=ASAH1 PE=1 SV=4	2	1,3	14	0.561	0.946237
134	sp|P11142|HSP7C_HUMAN	Heat shock cognate 71 kDa protein OS=Homo sapiens GN=HSPA8 PE=1 SV=1	6	1,2,3,4,5,6	40	0.562	1.03753
212	sp|P62937|PPIA_HUMAN	Peptidyl-prolyl cis-trans isomerase A OS=Homo sapiens GN=PPIA PE=1 SV=2	6	1,2,3,4,5,6	40	0.562	1.04713
1	sp|P31946|1433B_HUMAN	14-3-3 protein beta/alpha OS=Homo sapiens GN=YWHAB PE=1 SV=3	1	6	5	0.564	1.04713
29	sp|Q9NVJ2|ARL8B_HUMAN	ADP-ribosylation factor-like protein 8B OS=Homo sapiens GN=ARL8B PE=1 SV=1	1	6	5	0.564	1.3122
286	sp|Q9NQC3|RTN4_HUMAN	Reticulon-4 OS=Homo sapiens GN=RTN4 PE=1 SV=2	1	6	5	0.564	1.09144
197	sp|P22894|MMP8_HUMAN	Neutrophil collagenase OS=Homo sapiens GN=MMP8 PE=1 SV=1	5	1,2,3,4,5	35	0.567	1.02802
225	sp|P02776|PLF4_HUMAN	Platelet factor 4 OS=Homo sapiens GN=PF4 PE=1 SV=2	6	1,2,3,4,5,6	40	0.571	0.895365
142	sp|O60506|HNRPQ_HUMAN	Heterogeneous nuclear ribonucleoprotein Q OS=Homo sapiens GN=SYNCRIP PE=1 SV=2	4	1,3,4,5	28	0.572	1.23595
334	sp|P07948|LYN_HUMAN	Tyrosine-protein kinase Lyn OS=Homo sapiens GN=LYN PE=1 SV=3	4	1,2,4,5	28	0.572	1.1695
96	sp|P12724|ECP_HUMAN	Eosinophil cationic protein OS=Homo sapiens GN=RNASE3 PE=1 SV=2	6	1,2,3,4,5,6	40	0.580716	1.08143
253	sp|P06703|S10A6_HUMAN	Protein S100-A6 OS=Homo sapiens GN=S100A6 PE=1 SV=1	3	1,2,5	21	0.587	1.05682
199	sp|P19878|NCF2_HUMAN	Neutrophil cytosol factor 2 OS=Homo sapiens GN=NCF2 PE=1 SV=2	1	3	7	0.593	0.972747
279	sp|P51148|RAB5C_HUMAN	Ras-related protein Rab-5C OS=Homo sapiens GN=RAB5C PE=1 SV=2	1	3	7	0.593	1.01859
208	sp|Q6UX06|OLFM4_HUMAN	Olfactomedin-4 OS=Homo sapiens GN=OLFM4 PE=1 SV=1	6	1,2,3,4,5,6	40	0.6	0.907821
222	sp|P18669|PGAM1_HUMAN	Phosphoglycerate mutase 1 OS=Homo sapiens GN=PGAM1 PE=1 SV=2	6	1,2,3,4,5,6	40	0.6	1.00925
320	sp|P37802|TAGL2_HUMAN	Transgelin-2 OS=Homo sapiens GN=TAGLN2 PE=1 SV=3	6	1,2,3,4,5,6	40	0.6	0.977237
11	sp|P11021|GRP78_HUMAN	78 kDa glucose-regulated protein OS=Homo sapiens GN=HSPA5 PE=1 SV=2	4	1,2,4,5	28	0.605	0.870964
[truncated: 133 more rows]
